# Supplementary material for: Caenorhabditis elegans ETR-1/CELF has broad effects on the muscle cell transcriptome, including genes that regulate translation and neuroblast migration
Source: bioRxiv preprint, doi:10.1101/2021.06.08.447597, version 1 (2021-06-09)
Supplement: Supplemental File 1 [file 447597_file02.xlsx]

## Sheet: coding increased in muscle
WB_GeneID	baseMean	log2FoldChange	lfcSE	stat	pvalue	padj	symbol
WBGene00005967	8008.52	9.92666	0.380138	26.1133	2.57e-150	1.16e-146	srx-76
WBGene00004971	35.6929	9.37896	1.33114	7.04583	1.84e-12	9.58e-12	spe-17
WBGene00019243	8542.46	8.04057	0.34955	23.0026	4.39e-117	6.17e-114	fbxb-72
WBGene00010874	3932.12	8.01875	0.511415	15.6795	2.09e-55	1.29e-53	M05D6.1
WBGene00013483	9.72965	7.50786	1.77754	4.22375	2.4e-05	6.24e-05	nhr-241
WBGene00017833	1689.03	7.42942	0.582987	12.7437	3.38e-37	8.08e-36	F26F12.2
WBGene00021067	798.045	7.42827	0.580045	12.8064	1.51e-37	3.69e-36	W06H8.4
WBGene00021599	10926.1	7.17753	0.352606	20.3556	4.14e-92	1.94e-89	srt-42
WBGene00010876	3358.46	7.10631	0.493172	14.4094	4.52e-47	1.89e-45	M05D6.3
WBGene00014085	1283.88	6.9675	0.583488	11.9411	7.22e-33	1.38e-31	ZK809.1
WBGene00022822	6.59922	6.94709	1.703	4.07931	4.52e-05	0.000113375	ZK813.3
WBGene00009402	1995.36	6.82867	0.463653	14.728	4.26e-49	1.96e-47	F35C11.3
WBGene00022619	5.36974	6.64485	1.76224	3.77069	0.000162798	0.000380708	ZC477.4
WBGene00001736	19.7973	6.64025	1.30191	5.10041	3.39e-07	1.08e-06	grl-27
WBGene00009143	135.032	6.59173	0.876179	7.52326	5.34e-14	3.14e-13	F26A3.5
WBGene00020669	17.5798	6.51019	1.32961	4.89633	9.76e-07	2.99e-06	T22B2.5
WBGene00021384	4.82103	6.49058	2.66062	2.4395	0.0147075	0.0252276	Y37F4.3
WBGene00000012	254.957	6.37892	0.441341	14.4535	2.38e-47	1.01e-45	abf-1
WBGene00044235	4.42654	6.37006	1.84178	3.45865	0.000542899	0.00118092	C06A1.7
WBGene00016638	4.29544	6.32333	2.71948	2.3252	0.0200612	0.0335322	perm-4
WBGene00022889	31.2716	6.3133	1.10573	5.70961	1.13e-08	4.22e-08	ZK1290.7
WBGene00010880	1045.39	6.30632	0.548849	11.4901	1.48e-30	2.46e-29	M05D6.8
WBGene00010635	77.7966	6.26019	0.945525	6.62087	3.57e-11	1.66e-10	K07F5.7
WBGene00019594	7.83996	6.20681	1.80391	3.44075	0.000580112	0.00125532	K09H9.1
WBGene00022888	29.1186	6.20648	1.12671	5.50852	3.62e-08	1.28e-07	rnh-1.1
WBGene00004084	263.634	6.18529	0.690029	8.96382	3.14e-19	2.66e-18	pph-2
WBGene00043069	64.9257	6.17914	0.791174	7.81009	5.71e-15	3.61e-14	F20D6.12
WBGene00007259	3.85706	6.17196	1.9996	3.08659	0.00202465	0.00403103	C02B4.3
WBGene00022753	21.2521	6.14318	1.18495	5.18432	2.17e-07	7.07e-07	ZK484.7
WBGene00001839	381.115	6.1206	0.598295	10.2301	1.45e-24	1.7e-23	hdl-1
WBGene00017060	12052.6	6.1083	0.344525	17.7296	2.48e-70	3.34e-68	D2063.1
WBGene00044240	27.1345	6.09706	0.979202	6.22655	4.77e-10	2e-09	C47E12.14
WBGene00017872	13.6331	6.09405	1.29405	4.70928	2.49e-06	7.27e-06	F28A10.4
WBGene00011231	35428	6.06498	0.69222	8.76164	1.92e-18	1.56e-17	R11A5.3
WBGene00017294	735.826	6.03121	0.286636	21.0414	2.74e-98	1.63e-95	F09E10.1
WBGene00013055	715.251	5.9776	0.489544	12.2105	2.73e-34	5.67e-33	Y50E8A.12
WBGene00009043	153.039	5.95693	0.862434	6.90711	4.95e-12	2.48e-11	F22B5.5
WBGene00002026	26033.8	5.89354	0.315425	18.6845	6.62e-78	1.36e-75	hsp-70
WBGene00006555	502.943	5.8879	0.610629	9.64237	5.3e-22	5.31e-21	tbx-36
WBGene00005815	779.499	5.88002	0.493988	11.9032	1.14e-32	2.15e-31	srw-68
WBGene00018530	11.683	5.8643	1.41426	4.14655	3.38e-05	8.6e-05	F47B3.6
WBGene00005613	31.3809	5.72866	0.897453	6.38324	1.73e-10	7.58e-10	srj-25
WBGene00018525	10.3185	5.68141	1.4267	3.98221	6.83e-05	0.000167788	F47B3.6
WBGene00009615	138.256	5.66656	0.609758	9.29314	1.5e-20	1.38e-19	oac-25
WBGene00044230	19.318	5.60324	1.21954	4.59454	4.34e-06	1.23e-05	C36E8.6
WBGene00000649	87.4825	5.58537	1.17352	4.75948	1.94e-06	5.75e-06	col-73
WBGene00044370	41.7001	5.56309	0.823497	6.75545	1.42e-11	6.87e-11	C41H7.9
WBGene00044265	32.284	5.55438	0.837591	6.63138	3.33e-11	1.55e-10	Y105E8B.11
WBGene00044892	13.8512	5.54317	1.32372	4.18756	2.82e-05	7.26e-05	clec-257
WBGene00002015	293828	5.48838	0.606301	9.05225	1.4e-19	1.22e-18	hsp-16.1
WBGene00002017	297417	5.48422	0.605804	9.05279	1.39e-19	1.21e-18	hsp-16.1
WBGene00022874	290.481	5.44065	0.919696	5.91571	3.3e-09	1.29e-08	nep-25
WBGene00012411	4.52382	5.40878	1.6911	3.19839	0.00138198	0.00282672	Y7A5A.5
WBGene00009610	128.306	5.39521	0.661534	8.1556	3.47e-16	2.4e-15	oac-28
WBGene00004904	50.4455	5.38581	0.922072	5.84099	5.19e-09	2e-08	snf-5
WBGene00016637	294.982	5.38354	0.325476	16.5405	1.87e-61	1.58e-59	C44B12.3
WBGene00020667	157.471	5.36238	0.639823	8.38104	5.25e-17	3.85e-16	T22B2.3
WBGene00015998	42.1657	5.34364	1.2432	4.29829	1.72e-05	4.55e-05	srt-59
WBGene00003468	4.31727	5.3415	2.37565	2.24844	0.024548	0.0403636	msp-113
WBGene00011475	579.035	5.3409	0.457836	11.6655	1.91e-31	3.37e-30	T05D4.2
WBGene00003446	4.30297	5.3401	2.43521	2.19287	0.0283166	0.0459695	msp-53
WBGene00017910	31.8548	5.29724	0.826373	6.41024	1.45e-10	6.4e-10	F28H1.5
WBGene00012379	51.448	5.2908	0.780807	6.77606	1.23e-11	5.99e-11	Y1A5A.1
WBGene00000713	87.7681	5.26303	0.478127	11.0076	3.51e-28	5.12e-27	col-140
WBGene00009616	321.19	5.2494	0.520175	10.0916	6.02e-24	6.78e-23	F41D3.11
WBGene00255733	7.83181	5.24128	2.16966	2.41571	0.0157044	0.0268008	T02B11.13
WBGene00269355	634.881	5.20221	0.458065	11.3569	6.85e-30	1.1e-28	T28A11.25
WBGene00016161	10.745	5.1995	1.3066	3.97942	6.91e-05	0.000169582	C27D6.3
WBGene00009251	11.2167	5.19068	1.79445	2.89263	0.00382035	0.00727809	F29D10.2
WBGene00011266	1808.11	5.16397	0.635473	8.12619	4.43e-16	3.05e-15	R13H4.8
WBGene00020223	140.873	5.14561	0.787908	6.53073	6.55e-11	2.98e-10	T05A7.6
WBGene00003761	67.727	5.13656	0.692632	7.41601	1.21e-13	6.91e-13	nlp-23
WBGene00022754	10.7751	5.13134	1.40069	3.66343	0.000248864	0.00056679	nspd-1
WBGene00008759	17.1389	5.10475	1.24708	4.09337	4.25e-05	0.000107168	F13E9.10
WBGene00002019	253105	5.10204	0.614702	8.30002	1.04e-16	7.47e-16	hsp-16.48
WBGene00015489	58.592	5.10189	0.846554	6.02666	1.67e-09	6.74e-09	C05E4.7
WBGene00002020	253273	5.10141	0.614682	8.29926	1.05e-16	7.51e-16	hsp-16.48
WBGene00011714	3.59053	5.07255	1.95326	2.59697	0.00940511	0.0167274	T11F9.13
WBGene00021818	15258.4	5.05271	0.414457	12.1911	3.47e-34	7.13e-33	Y53G8B.2
WBGene00018359	118.609	5.04613	0.393469	12.8247	1.19e-37	2.92e-36	F42G8.8
WBGene00016185	32.627	5.0081	0.921706	5.43351	5.53e-08	1.91e-07	C28F5.4
WBGene00010792	2535.73	4.99542	0.175123	28.5252	5.71e-179	6.42e-175	K12G11.6
WBGene00002016	60298.1	4.95671	0.60073	8.25114	1.57e-16	1.11e-15	hsp-16.2
WBGene00017875	59.3687	4.91885	0.886102	5.55111	2.84e-08	1.01e-07	F28A10.7
WBGene00011004	873.143	4.91244	0.340827	14.4133	4.27e-47	1.79e-45	R04B5.6
WBGene00014007	176.806	4.87407	0.467549	10.4247	1.91e-25	2.35e-24	ZK596.2
WBGene00013356	17.3183	4.86137	0.989363	4.91364	8.94e-07	2.74e-06	Y59A8B.24
WBGene00020840	53.3428	4.85169	0.832266	5.8295	5.56e-09	2.14e-08	spch-3
WBGene00016835	242.925	4.82078	0.364377	13.2302	5.87e-40	1.63e-38	C50F2.1
WBGene00013081	16420.9	4.81522	0.291474	16.5202	2.62e-61	2.2e-59	Y51A2D.14
WBGene00002110	4337.88	4.80837	0.333114	14.4346	3.13e-47	1.32e-45	ins-27
WBGene00020886	27964.9	4.78214	0.397741	12.0233	2.68e-33	5.22e-32	ttr-6
WBGene00016636	5.35101	4.77426	1.63572	2.91876	0.00351429	0.00673376	perm-2
WBGene00022072	2501.9	4.77132	0.283994	16.8008	2.41e-63	2.25e-61	cpg-9
WBGene00009091	3431.09	4.75652	0.255409	18.6231	2.09e-77	4.09e-75	F23D12.7
WBGene00015864	3239.23	4.75574	0.417178	11.3998	4.19e-30	6.81e-29	C16D9.9
WBGene00000220	2441.56	4.75403	0.494163	9.62037	6.56e-22	6.55e-21	atf-2
WBGene00009612	27.1826	4.73825	0.884883	5.35467	8.57e-08	2.92e-07	F41D3.7
WBGene00001310	49.0208	4.73063	0.757005	6.24914	4.13e-10	1.74e-09	end-1
WBGene00009155	281.236	4.72693	0.602242	7.84888	4.2e-15	2.68e-14	lhfp-4
WBGene00017633	67.2712	4.72406	0.5991	7.88526	3.14e-15	2.03e-14	F20D6.1
WBGene00013573	159.129	4.72293	0.489926	9.64009	5.41e-22	5.43e-21	Y75B12B.11
WBGene00008696	7.94846	4.71313	2.16513	2.17684	0.0294926	0.0477205	clec-255
WBGene00000776	174420	4.68745	0.294118	15.9373	3.49e-57	2.4e-55	cpl-1
WBGene00009437	65.4417	4.68673	0.644523	7.27163	3.55e-13	1.95e-12	F35G2.3
WBGene00016053	23.7366	4.66609	1.21657	3.83544	0.000125339	0.000297684	ptp-5.1
WBGene00011172	46.8519	4.65644	0.790303	5.89197	3.82e-09	1.49e-08	R09E10.2
WBGene00018819	12614.3	4.65371	0.409244	11.3715	5.8e-30	9.34e-29	rog-1
WBGene00016987	38219.5	4.65024	0.41526	11.1984	4.15e-29	6.32e-28	CC8.2
WBGene00015199	1526.4	4.61693	0.270898	17.043	3.94e-65	4.03e-63	B0454.8
WBGene00021066	3055.44	4.59214	0.507383	9.05064	1.42e-19	1.23e-18	W06H8.2
WBGene00002012	7120.58	4.58316	0.442464	10.3583	3.84e-25	4.64e-24	hsp-12.3
WBGene00000693	167.614	4.56547	0.770462	5.92562	3.11e-09	1.22e-08	col-119
WBGene00007909	642.246	4.55536	0.571083	7.97671	1.5e-15	9.98e-15	C34B4.4
WBGene00013512	19.1999	4.55346	1.38875	3.27881	0.00104246	0.00217192	nhr-276
WBGene00008405	36076.8	4.55159	0.276308	16.4729	5.74e-61	4.65e-59	ttll-12
WBGene00000027	62.5455	4.55087	0.713449	6.37869	1.79e-10	7.8e-10	abu-4
WBGene00017148	18.9615	4.53499	0.824642	5.49934	3.81e-08	1.34e-07	EGAP2.2
WBGene00235390	13.8621	4.52041	1.09132	4.14216	3.44e-05	8.76e-05	F56A6.8
WBGene00019335	41.9387	4.51788	0.837958	5.39154	6.99e-08	2.4e-07	K02F6.1
WBGene00019437	911.919	4.51286	0.288369	15.6496	3.34e-55	2.06e-53	K06A9.3
WBGene00044392	76.8087	4.50651	0.512267	8.7972	1.4e-18	1.15e-17	C25H3.16
WBGene00008230	3681.12	4.50626	0.277004	16.2678	1.67e-59	1.28e-57	pfk-1.2
WBGene00022194	16140.6	4.48711	0.254723	17.6157	1.87e-69	2.38e-67	Y71H2B.4
WBGene00001385	386453	4.48392	0.278742	16.0863	3.18e-58	2.3e-56	far-1
WBGene00020670	94.2928	4.4608	0.474182	9.40736	5.09e-21	4.79e-20	T22B2.6
WBGene00007085	49.6055	4.44994	0.667756	6.66402	2.66e-11	1.26e-10	AH10.4
WBGene00219289	251.408	4.4114	0.395923	11.1421	7.83e-29	1.18e-27	T05C12.15
WBGene00022207	168.548	4.41136	0.369489	11.9391	7.4e-33	1.41e-31	elk-2
WBGene00009692	745986	4.40044	0.604069	7.28466	3.22e-13	1.78e-12	F44E5.4
WBGene00009691	742692	4.39382	0.605313	7.25876	3.91e-13	2.14e-12	F44E5.4
WBGene00001386	14708.6	4.38568	0.293465	14.9445	1.69e-50	8.49e-49	far-2
WBGene00045272	11252.1	4.37904	0.528226	8.29009	1.13e-16	8.1e-16	F59C12.4
WBGene00006624	889.591	4.36927	0.378526	11.5429	8.02e-31	1.36e-29	try-6
WBGene00020878	691.586	4.36744	0.595484	7.33427	2.23e-13	1.25e-12	T28A11.16
WBGene00012207	6.49285	4.36542	1.66855	2.61629	0.00888909	0.0158761	W02B12.12
WBGene00011855	74.3189	4.35294	0.633404	6.8723	6.32e-12	3.14e-11	clec-183
WBGene00020872	55.5745	4.34887	0.647705	6.71427	1.89e-11	9.03e-11	T28A11.5
WBGene00044683	6.22077	4.33836	1.75674	2.46955	0.0135281	0.023363	C36E6.8
WBGene00000632	94.691	4.33815	0.50675	8.56073	1.12e-17	8.62e-17	col-55
WBGene00003470	10.2137	4.3381	1.35095	3.21115	0.00132204	0.00271249	msp-152
WBGene00019038	13.6752	4.32487	1.43792	3.00772	0.00263217	0.00513884	irld-37
WBGene00015890	124.883	4.31484	0.663957	6.49867	8.1e-11	3.66e-10	C17C3.5
WBGene00002018	49668.8	4.30067	0.6053	7.10503	1.2e-12	6.35e-12	hsp-16.41
WBGene00017413	359.027	4.28573	0.502321	8.53185	1.44e-17	1.1e-16	F13A2.4
WBGene00009514	3188.67	4.27852	0.362098	11.8159	3.23e-32	5.96e-31	F37H8.5
WBGene00005612	29.1902	4.2778	0.825456	5.18234	2.19e-07	7.13e-07	srj-24
WBGene00003114	304.288	4.27595	0.28218	15.1533	7.21e-52	3.83e-50	mab-23
WBGene00003079	5890.93	4.2743	0.567337	7.53396	4.92e-14	2.9e-13	lsm-5
WBGene00018563	129.972	4.27385	0.493477	8.66069	4.69e-18	3.71e-17	F47D12.7
WBGene00007356	5.70545	4.27158	1.60604	2.6597	0.00782096	0.014114	C06A1.6
WBGene00022624	141.595	4.26325	0.43216	9.86497	5.91e-23	6.26e-22	ZC487.2
WBGene00000549	27164.9	4.25646	0.2316	18.3785	1.95e-75	3.54e-73	cls-2
WBGene00018022	75.5788	4.25512	0.680548	6.25249	4.04e-10	1.71e-09	ceh-87
WBGene00004185	9239.93	4.25319	0.312383	13.6153	3.25e-42	1.02e-40	pro-1
WBGene00015006	98.1471	4.25025	0.48387	8.78387	1.58e-18	1.29e-17	B0041.1
WBGene00009374	18212.1	4.23967	0.29024	14.6075	2.52e-48	1.12e-46	F34D10.4
WBGene00010999	37.6858	4.224	0.698834	6.04435	1.5e-09	6.06e-09	R03G8.4
WBGene00003429	72.892	4.22395	0.810889	5.20904	1.9e-07	6.23e-07	msp-31
WBGene00018527	575.646	4.21878	0.263173	16.0304	7.83e-58	5.58e-56	F47B3.3
WBGene00008410	8224.32	4.21786	0.589309	7.15731	8.23e-13	4.4e-12	D2023.6
WBGene00013077	97396.1	4.21488	0.229344	18.378	1.97e-75	3.55e-73	ttr-24
WBGene00010791	6463.36	4.20533	0.317517	13.2444	4.86e-40	1.36e-38	sodh-2
WBGene00020221	32.114	4.1969	0.726512	5.77678	7.61e-09	2.89e-08	T05A7.3
WBGene00005579	28.3463	4.18567	0.980042	4.27091	1.95e-05	5.12e-05	sri-67
WBGene00011909	13.109	4.18096	1.27424	3.28113	0.00103392	0.00215592	T22A3.6
WBGene00013078	19864.8	4.17155	0.234137	17.8167	5.24e-71	7.33e-69	ttr-25
WBGene00012979	201.315	4.1647	0.359127	11.5967	4.28e-31	7.36e-30	Y48B6A.5
WBGene00023478	10.5481	4.15836	1.47459	2.82001	0.00480219	0.00899188	srz-62
WBGene00000820	3707.6	4.15449	0.22874	18.1625	1.02e-73	1.66e-71	csp-2
WBGene00011300	73241.2	4.14967	0.454339	9.13341	6.64e-20	5.9e-19	R107.5
WBGene00000703	879.84	4.14695	0.221686	18.7064	4.39e-78	9.24e-76	col-129
WBGene00013181	41311.6	4.14612	0.372722	11.1239	9.6e-29	1.44e-27	Y53H1B.2
WBGene00012764	727.29	4.14481	0.282848	14.6538	1.27e-48	5.74e-47	Y41E3.6
WBGene00016462	182.093	4.14026	0.854024	4.84794	1.25e-06	3.77e-06	C35E7.10
WBGene00206374	372.508	4.13597	0.281133	14.7118	5.42e-49	2.47e-47	K10G6.9
WBGene00015097	632.66	4.13231	0.279181	14.8016	1.43e-49	6.8e-48	B0273.1
WBGene00012293	640.32	4.13037	0.396774	10.4099	2.24e-25	2.74e-24	W06A7.4
WBGene00008935	70.356	4.12941	0.528847	7.80832	5.8e-15	3.66e-14	F18C12.4
WBGene00006525	6755.21	4.10922	0.306908	13.3891	7e-41	2.05e-39	tax-2
WBGene00020899	10.8425	4.10683	1.11564	3.68113	0.000232203	0.000531641	T28D9.11
WBGene00018579	8280.23	4.10642	0.184886	22.2106	2.71e-109	2.91e-106	acs-16
WBGene00006509	445.125	4.09826	0.379125	10.8098	3.09e-27	4.22e-26	tag-164
WBGene00006789	1.24376e+06	4.09701	0.31703	12.9231	3.34e-38	8.43e-37	unc-54
WBGene00015891	83.3562	4.09006	0.645769	6.33363	2.39e-10	1.03e-09	C17C3.6
WBGene00014093	141.563	4.08806	0.435226	9.39297	5.83e-21	5.48e-20	ZK829.1
WBGene00008235	1041.15	4.08296	0.226781	18.004	1.81e-72	2.78e-70	C50F4.10
WBGene00249815	297.561	4.07497	0.382899	10.6424	1.89e-26	2.48e-25	F20D12.12
WBGene00013275	6347.38	4.07253	0.208883	19.4967	1.17e-84	3.71e-82	btb-14
WBGene00006692	2263.97	4.07052	0.232819	17.4837	1.91e-68	2.26e-66	twk-42
WBGene00003760	17.0435	4.06894	0.953828	4.26591	1.99e-05	5.22e-05	nlp-22
WBGene00017581	43.5627	4.06855	0.667041	6.0994	1.06e-09	4.35e-09	F18G5.5
WBGene00012165	359.723	4.0661	0.407563	9.97662	1.93e-23	2.11e-22	cutl-6
WBGene00004135	59408	4.06576	0.26057	15.6033	6.91e-55	4.16e-53	pqn-48
WBGene00008247	206.578	4.05451	0.310119	13.074	4.63e-39	1.22e-37	srsx-26
WBGene00006683	13846.7	4.05213	0.235998	17.1702	4.44e-66	4.7e-64	twk-31
WBGene00009589	819.187	4.04703	0.681222	5.94083	2.84e-09	1.12e-08	F40F11.4
WBGene00021526	647.86	4.03013	0.393288	10.2473	1.22e-24	1.43e-23	Y41G9A.2
WBGene00015623	642.612	4.02482	0.724361	5.55637	2.75e-08	9.86e-08	C09B8.4
WBGene00000779	69262.6	4.02173	0.271823	14.7954	1.57e-49	7.41e-48	cpn-3
WBGene00014247	3.35102	4.01536	1.85494	2.16469	0.0304117	0.0490841	ZK1307.4
WBGene00008079	471.883	4.01143	0.348907	11.4971	1.36e-30	2.27e-29	C44B9.2
WBGene00004249	19239.9	4.00743	0.210911	19.0006	1.69e-80	4.22e-78	pvf-1
WBGene00009291	11346.8	4.00629	0.236764	16.921	3.15e-64	3.07e-62	clec-264
WBGene00001765	38.4596	4.00505	0.974571	4.10955	3.96e-05	0.000100288	gst-17
WBGene00019357	63877.1	4.0043	0.397317	10.0784	6.89e-24	7.71e-23	cpg-8
WBGene00008538	17366.6	4.00393	0.256971	15.5812	9.76e-55	5.85e-53	sqrd-1
WBGene00002280	154647	4.00391	0.3652	10.9636	5.72e-28	8.21e-27	let-2
WBGene00007418	558.614	4.00158	0.341347	11.7229	9.73e-32	1.74e-30	C07E3.8
WBGene00011579	6788.57	4.00016	0.204066	19.6023	1.48e-85	4.97e-83	T07D4.2
WBGene00001079	263580	3.99275	0.187922	21.2468	3.53e-100	2.48e-97	dpy-20
WBGene00014079	63710.7	3.99259	0.240935	16.5712	1.13e-61	9.71e-60	ZK792.7
WBGene00008054	5.05107	3.97957	1.62129	2.45458	0.014105	0.02427	C41C4.9
WBGene00016327	92.5707	3.97293	0.750041	5.29695	1.18e-07	3.94e-07	C32E12.1
WBGene00236786	101	3.97129	0.630029	6.30333	2.91e-10	1.25e-09	C17H12.37
WBGene00000066	326916	3.9704	0.22295	17.8085	6.07e-71	8.44e-69	act-4
WBGene00012294	6.51087	3.95645	1.59964	2.47334	0.0133858	0.0231368	nspa-8
WBGene00012424	9327.54	3.95105	0.193825	20.3846	2.29e-92	1.1e-89	dlc-3
WBGene00015211	44.0383	3.9468	1.15738	3.41012	0.000649347	0.00139362	B0496.2
WBGene00021302	20.6186	3.94582	0.821835	4.80123	1.58e-06	4.72e-06	Y32G9A.3
WBGene00003242	126868	3.9458	0.266041	14.8316	9.16e-50	4.41e-48	mig-6
WBGene00012812	28072.1	3.93867	0.235902	16.6962	1.4e-62	1.27e-60	Y43F8B.1
WBGene00005818	1896.09	3.93173	0.336401	11.6876	1.47e-31	2.61e-30	srw-71
WBGene00044312	325.194	3.93069	0.37229	10.5581	4.66e-26	5.99e-25	K04C2.8
WBGene00003434	57.8473	3.9284	0.688075	5.70927	1.13e-08	4.22e-08	msp-38
WBGene00022884	79.7288	3.92658	0.8357	4.69855	2.62e-06	7.64e-06	ZK1248.17
WBGene00000861	30.3759	3.92254	0.773731	5.06964	3.99e-07	1.26e-06	cwp-3
WBGene00002194	262.263	3.91824	0.800986	4.89177	9.99e-07	3.06e-06	kin-6
WBGene00020869	7735.23	3.90913	0.3062	12.7666	2.52e-37	6.08e-36	T28A11.2
WBGene00003933	7837.23	3.90612	0.257516	15.1685	5.72e-52	3.07e-50	pat-9
WBGene00015032	42.0056	3.90223	1.18962	3.28022	0.00103725	0.00216185	B0207.9
WBGene00007749	10661.1	3.89561	0.179502	21.7023	1.95e-104	1.63e-101	ceh-79
WBGene00016574	2933.85	3.89064	0.282322	13.7808	3.32e-43	1.12e-41	lido-11
WBGene00009550	9.05274	3.89053	1.11526	3.48845	0.000485831	0.00106284	F38H4.6
WBGene00010234	2606.03	3.88971	0.722386	5.38453	7.26e-08	2.49e-07	ttr-50
WBGene00006983	1450.31	3.87667	0.329335	11.7712	5.49e-32	1e-30	zig-6
WBGene00044462	81.9472	3.87505	0.498089	7.77982	7.26e-15	4.56e-14	C44B12.9
WBGene00044737	13456.6	3.87204	0.233583	16.5768	1.03e-61	8.89e-60	ttr-45
WBGene00008191	21246.7	3.86766	0.194667	19.8681	7.69e-88	3.04e-85	C49A1.10
WBGene00006661	18.7227	3.86683	1.53655	2.51657	0.0118505	0.0206958	twk-6
WBGene00001805	2727.85	3.8661	0.316059	12.2322	2.09e-34	4.37e-33	gur-4
WBGene00001966	21.2515	3.86052	0.696204	5.5451	2.94e-08	1.05e-07	hlh-27
WBGene00004744	30012.5	3.85775	0.204412	18.8725	1.92e-79	4.41e-77	scp-1
WBGene00044449	7.54955	3.85517	1.34084	2.87518	0.00403793	0.00766472	fipr-20
WBGene00018720	1455.44	3.84753	0.314785	12.2227	2.35e-34	4.9e-33	F53A3.1
WBGene00019925	25.3705	3.84622	0.69631	5.52372	3.32e-08	1.18e-07	fbxc-31
WBGene00016578	73.4147	3.84171	0.704712	5.45145	5e-08	1.74e-07	sdz-5
WBGene00012180	40.1392	3.83979	0.686348	5.59452	2.21e-08	8.01e-08	W01D2.3
WBGene00044139	7.54133	3.83884	1.19518	3.21194	0.00131841	0.00270604	F42D1.4
WBGene00001892	120.184	3.83812	0.589819	6.50729	7.65e-11	3.46e-10	his-18
WBGene00003169	9697.56	3.83262	0.290435	13.1961	9.24e-40	2.54e-38	mec-5
WBGene00020761	1718.43	3.8207	0.415495	9.19552	3.73e-20	3.36e-19	T24C4.5
WBGene00006495	66964.5	3.81448	0.21803	17.4952	1.56e-68	1.87e-66	cpna-1
WBGene00001263	181411	3.80586	0.360146	10.5676	4.21e-26	5.43e-25	emb-9
WBGene00000788	47099.7	3.80487	0.201286	18.9028	1.08e-79	2.51e-77	cpz-1
WBGene00017061	71.5135	3.80462	0.422551	9.00394	2.18e-19	1.87e-18	oac-12
WBGene00018221	34477.2	3.79904	0.205914	18.4496	5.25e-76	9.69e-74	F40A3.6
WBGene00044521	86.7455	3.79723	0.57011	6.66053	2.73e-11	1.28e-10	Y5H2A.4
WBGene00044511	41.298	3.79646	0.939965	4.03894	5.37e-05	0.000133565	clec-181
WBGene00001572	19337.3	3.7943	0.235992	16.0781	3.63e-58	2.62e-56	gei-15
WBGene00195186	2053.1	3.79362	0.268386	14.1349	2.31e-45	8.8e-44	F19G12.10
WBGene00006210	37.6063	3.79331	0.629384	6.02702	1.67e-09	6.72e-09	str-165
WBGene00010958	2090.33	3.79175	0.380318	9.96993	2.06e-23	2.25e-22	ND4L
WBGene00000432	4.16927	3.79025	1.68598	2.24809	0.0245702	0.0403973	ceh-7
WBGene00005543	1768.54	3.77899	0.232767	16.2351	2.85e-59	2.17e-57	sri-31
WBGene00010382	98.0785	3.77864	0.404293	9.34629	9.08e-21	8.43e-20	H12D21.6
WBGene00018033	10233.2	3.77761	0.199608	18.9251	7.09e-80	1.68e-77	F35B3.7
WBGene00000964	29526.1	3.7722	0.214387	17.5953	2.68e-69	3.35e-67	dhp-2
WBGene00020568	2810.92	3.77106	0.176216	21.4002	1.33e-101	9.66e-99	T19D2.3
WBGene00004397	44.363	3.76044	0.707351	5.31622	1.06e-07	3.57e-07	rol-6
WBGene00016573	2728.27	3.75946	0.337061	11.1537	6.87e-29	1.04e-27	lido-12
WBGene00045209	21.3048	3.75935	0.822417	4.57109	4.85e-06	1.37e-05	F13E9.16
WBGene00005016	29.745	3.75913	0.93199	4.03345	5.5e-05	0.000136533	sqt-1
WBGene00021079	6056.3	3.75334	0.28786	13.0388	7.36e-39	1.93e-37	W08A12.2
WBGene00009018	1445.29	3.74943	0.219962	17.0459	3.75e-65	3.86e-63	F21D9.4
WBGene00044406	2861.55	3.74533	0.336681	11.1243	9.56e-29	1.43e-27	F02A9.7
WBGene00001948	3779.1	3.74398	0.217131	17.2429	1.26e-66	1.36e-64	hlh-1
WBGene00015393	30277.6	3.73928	0.235547	15.8749	9.46e-57	6.32e-55	C03G6.5
WBGene00003495	144219	3.73538	0.300872	12.4152	2.16e-35	4.74e-34	mup-2
WBGene00010634	47.9464	3.73122	0.543512	6.86502	6.65e-12	3.3e-11	K07F5.6
WBGene00044578	1791.09	3.72918	0.273992	13.6106	3.47e-42	1.08e-40	M02D8.6
WBGene00006764	105630	3.7245	0.265207	14.0437	8.41e-45	3.12e-43	unc-27
WBGene00002088	399.309	3.72221	0.415705	8.95396	3.43e-19	2.9e-18	ins-5
WBGene00008254	13472.6	3.72005	0.317821	11.7049	1.2e-31	2.14e-30	C51E3.9
WBGene00020898	479.778	3.71716	0.548252	6.78001	1.2e-11	5.83e-11	lido-16
WBGene00017440	234075	3.7121	0.216971	17.1087	1.28e-65	1.33e-63	upb-1
WBGene00044921	1737.32	3.70993	0.308327	12.0325	2.4e-33	4.68e-32	F53C11.9
WBGene00008155	167.838	3.70323	0.40571	9.12778	6.99e-20	6.2e-19	C47E12.12
WBGene00011303	9051.5	3.69859	0.293806	12.5886	2.44e-36	5.6e-35	R166.3
WBGene00022339	337.058	3.69472	0.360523	10.2482	1.21e-24	1.41e-23	Y82E9BR.6
WBGene00018257	13900.1	3.69346	0.200097	18.4584	4.47e-76	8.32e-74	F41B4.1
WBGene00015884	73.7274	3.69127	0.979378	3.76899	0.000163906	0.00038314	C17B7.10
WBGene00009268	15.2989	3.6905	1.11558	3.30814	0.000939189	0.00197079	F30A10.11
WBGene00005475	20.7922	3.68967	1.14148	3.23237	0.00122769	0.00253184	srh-269
WBGene00018620	78.7223	3.68622	0.593689	6.209	5.33e-10	2.23e-09	F48G7.9
WBGene00019282	9585.44	3.68435	0.255585	14.4153	4.14e-47	1.74e-45	mps-2
WBGene00019381	22008.7	3.67898	0.361477	10.1776	2.5e-24	2.88e-23	K04C2.3
WBGene00000768	16025.6	3.67873	0.269191	13.6659	1.62e-42	5.22e-41	cor-1
WBGene00012754	62.9301	3.67762	0.648435	5.67153	1.42e-08	5.22e-08	Y41C4A.7
WBGene00003812	24032.5	3.67742	0.201305	18.2679	1.49e-74	2.52e-72	nrf-5
WBGene00012544	33471	3.66706	0.196874	18.6264	1.96e-77	3.88e-75	Y37D8A.2
WBGene00006587	96992.7	3.66565	0.203532	18.0102	1.62e-72	2.52e-70	tnt-2
WBGene00011005	13.2158	3.65946	1.39331	2.62645	0.00862803	0.0154393	R04B5.7
WBGene00018407	10366.7	3.65871	0.161537	22.6493	1.42e-113	1.68e-110	F44B9.2
WBGene00012857	4168.69	3.65561	0.260843	14.0146	1.27e-44	4.66e-43	pbo-5
WBGene00235280	10.6016	3.65504	0.936053	3.90474	9.43e-05	0.000227533	F42A9.17
WBGene00011791	85.2329	3.65292	0.760237	4.80498	1.55e-06	4.63e-06	T15H9.6
WBGene00022071	61.5998	3.64506	0.458027	7.95818	1.75e-15	1.15e-14	Y67D8C.7
WBGene00017021	34.6002	3.64473	1.13651	3.20694	0.00134155	0.00274978	D1022.2
WBGene00044151	209.427	3.64424	0.479452	7.60084	2.94e-14	1.77e-13	W04G3.12
WBGene00020105	19.9537	3.64302	0.898575	4.05421	5.03e-05	0.000125646	R148.7
WBGene00017619	133.345	3.64193	0.343649	10.5978	3.05e-26	3.96e-25	F20A1.8
WBGene00016730	195.315	3.6414	0.299623	12.1533	5.51e-34	1.12e-32	C46H11.6
WBGene00019732	4536.76	3.64061	0.25511	14.2707	3.33e-46	1.32e-44	M02D8.6
WBGene00003555	3419.61	3.63977	0.268186	13.5718	5.88e-42	1.8e-40	nas-39
WBGene00014801	3751.19	3.63881	0.293174	12.4118	2.26e-35	4.93e-34	K08E5.1
WBGene00006318	4477.02	3.63582	0.205277	17.7117	3.41e-70	4.51e-68	sup-9
WBGene00017632	16.1407	3.62462	1.21436	2.98479	0.00283774	0.00550817	F20B6.9
WBGene00009633	216.589	3.62443	0.423296	8.56241	1.11e-17	8.5e-17	F42E11.3
WBGene00015816	1165.84	3.61881	0.333268	10.8585	1.82e-27	2.51e-26	C16A11.3
WBGene00015876	7.73797	3.61384	1.20566	2.99738	0.00272308	0.00530483	C17B7.2
WBGene00012649	6.29714	3.60914	1.39847	2.58078	0.0098576	0.0174729	Y39A1A.10
WBGene00014826	46488	3.60815	0.293486	12.2941	9.74e-35	2.08e-33	R13H4.2
WBGene00008460	48.6885	3.59858	0.725619	4.95932	7.07e-07	2.19e-06	E02H4.2
WBGene00021864	1291.87	3.59718	0.171903	20.9256	3.13e-97	1.64e-94	fbxa-1
WBGene00000822	124797	3.59632	0.179056	20.0849	9.99e-90	4.17e-87	csq-1
WBGene00004092	2505.51	3.59526	0.249262	14.4236	3.68e-47	1.55e-45	ppt-1
WBGene00007224	43.1509	3.5935	0.463955	7.74537	9.53e-15	5.93e-14	C01G6.2
WBGene00007747	24.2068	3.59087	0.686486	5.2308	1.69e-07	5.56e-07	C26E1.1
WBGene00016838	8429.42	3.58995	0.227314	15.7929	3.48e-56	2.28e-54	C50F2.4
WBGene00014262	39663.1	3.58859	0.23412	15.328	4.97e-53	2.78e-51	ZK1321.4
WBGene00019277	3053.19	3.58665	0.168989	21.2241	5.72e-100	3.79e-97	sgcb-1
WBGene00001885	401.614	3.58395	0.41501	8.63583	5.83e-18	4.59e-17	his-11
WBGene00005816	473.78	3.57331	0.563216	6.34448	2.23e-10	9.66e-10	srw-69
WBGene00019328	5790.32	3.57304	0.152444	23.4383	1.74e-121	3.27e-118	clec-149
WBGene00022048	133429	3.5727	0.237256	15.0584	3.04e-51	1.57e-49	fln-1
WBGene00020732	56182.3	3.56818	0.27058	13.1872	1.04e-39	2.85e-38	T23E7.2
WBGene00005291	56.0775	3.56574	0.682332	5.22581	1.73e-07	5.71e-07	srh-70
WBGene00077585	7.5815	3.56552	1.27393	2.79884	0.00512869	0.00956505	T01G5.8
WBGene00021893	22260.8	3.56221	0.266543	13.3645	9.75e-41	2.82e-39	ndnf-1
WBGene00004736	491531	3.55902	0.204337	17.4174	6.09e-68	7.04e-66	sca-1
WBGene00012850	50935.2	3.5554	0.356	9.98708	1.74e-23	1.9e-22	Y44A6C.1
WBGene00001766	47.6692	3.55423	0.540338	6.57779	4.78e-11	2.2e-10	gst-18
WBGene00016250	91247.3	3.55276	0.356526	9.96494	2.17e-23	2.36e-22	hsp-110
WBGene00010440	17935.7	3.55263	0.310174	11.4536	2.25e-30	3.72e-29	ttr-51
WBGene00050884	3160.52	3.55222	0.204793	17.3454	2.14e-67	2.38e-65	Y69H2.15
WBGene00012821	2416.78	3.55025	0.167979	21.1351	3.78e-99	2.3e-96	Y43F8B.11
WBGene00006754	380305	3.55012	0.296714	11.9648	5.43e-33	1.04e-31	unc-15
WBGene00001606	920.424	3.54895	0.377981	9.38924	6.04e-21	5.67e-20	gln-5
WBGene00043982	1521.36	3.54304	0.323961	10.9366	7.7e-28	1.09e-26	B0403.6
WBGene00021176	3684.52	3.54212	0.321115	11.0307	2.72e-28	3.99e-27	Y9C9A.1
WBGene00007196	687.811	3.53601	0.245785	14.3866	6.28e-47	2.61e-45	B0513.4
WBGene00044180	405.483	3.53299	0.74706	4.72919	2.25e-06	6.62e-06	C47E8.11
WBGene00019753	1683.52	3.52752	0.381614	9.2437	2.38e-20	2.16e-19	M03E7.1
WBGene00012382	122877	3.5274	0.187376	18.8252	4.69e-79	1.04e-76	ttr-16
WBGene00022214	34.059	3.52729	0.624476	5.6484	1.62e-08	5.94e-08	cal-6
WBGene00016946	24.4001	3.52707	0.666041	5.29558	1.19e-07	3.97e-07	C55B7.10
WBGene00005076	12.2513	3.52559	0.827309	4.26151	2.03e-05	5.32e-05	srb-11
WBGene00018485	8144.63	3.52497	0.255364	13.8037	2.42e-43	8.25e-42	F46C8.3
WBGene00017065	20566.1	3.52408	0.292979	12.0285	2.52e-33	4.9e-32	D2092.4
WBGene00001918	253.187	3.52326	0.435636	8.08761	6.08e-16	4.14e-15	his-15
WBGene00010719	96.831	3.52253	0.460872	7.64319	2.12e-14	1.29e-13	K09E4.1
WBGene00008916	442.807	3.52097	0.372176	9.46048	3.07e-21	2.93e-20	clec-221
WBGene00018184	2730.04	3.51952	0.221563	15.8849	8.06e-57	5.43e-55	F38E9.1
WBGene00044078	18021.2	3.51814	0.179497	19.6	1.55e-85	5.12e-83	tag-243
WBGene00006643	3956.58	3.51478	0.36762	9.56093	1.17e-21	1.15e-20	tsp-17
WBGene00000065	299775	3.51282	0.355509	9.8811	5.03e-23	5.37e-22	act-3
WBGene00021720	1313.66	3.51072	0.232652	15.09	1.88e-51	9.85e-50	Y49F6B.8
WBGene00018490	18.1979	3.5074	0.775235	4.52431	6.06e-06	1.69e-05	F46E10.3
WBGene00020877	178.479	3.50618	0.306527	11.4384	2.69e-30	4.41e-29	srt-63
WBGene00004130	78002.8	3.50332	0.490178	7.14702	8.87e-13	4.73e-12	ketn-1
WBGene00015954	22378.9	3.49605	0.293324	11.9187	9.45e-33	1.8e-31	C18B2.3
WBGene00020812	13824.3	3.49529	0.320031	10.9217	9.08e-28	1.28e-26	acdh-7
WBGene00219296	42.4481	3.49194	0.917553	3.80571	0.000141397	0.000333325	C54C6.11
WBGene00016251	158.289	3.49115	0.302366	11.5461	7.73e-31	1.31e-29	C30E1.2
WBGene00010053	891.854	3.48875	0.286551	12.175	4.23e-34	8.67e-33	F54D5.9
WBGene00017250	5220.61	3.48709	0.252631	13.8031	2.44e-43	8.31e-42	F08D12.7
WBGene00022218	27.9518	3.48475	0.673833	5.17153	2.32e-07	7.55e-07	Y73B3A.16
WBGene00019337	1005.91	3.47535	0.487331	7.1314	9.94e-13	5.27e-12	K02F6.3
WBGene00001066	54.4381	3.47512	1.09865	3.16308	0.00156112	0.00316638	dpy-4
WBGene00022849	276.419	3.473	0.447368	7.76318	8.28e-15	5.17e-14	acs-6
WBGene00008754	379.233	3.47078	0.272596	12.7323	3.91e-37	9.3e-36	F13E9.5
WBGene00002881	12838.8	3.46933	0.252478	13.7411	5.76e-43	1.91e-41	let-756
WBGene00006517	13071.7	3.4677	0.337077	10.2876	8.02e-25	9.53e-24	madd-3
WBGene00004131	92950.9	3.46733	0.250694	13.8309	1.66e-43	5.72e-42	pqn-44
WBGene00000063	304493	3.46592	0.36662	9.45373	3.27e-21	3.12e-20	act-3
WBGene00006824	8192.51	3.45755	0.331345	10.4349	1.72e-25	2.13e-24	unc-95
WBGene00015472	15437.8	3.45711	0.245768	14.0666	6.1e-45	2.28e-43	C05D9.3
WBGene00000706	25.685	3.44736	0.746522	4.61789	3.88e-06	1.11e-05	col-132
WBGene00011692	16619.5	3.44646	0.166135	20.7449	1.36e-95	6.97e-93	T10G3.1
WBGene00023490	4337.44	3.44548	0.392703	8.77376	1.73e-18	1.41e-17	F36A2.14
WBGene00020808	150981	3.4406	0.262753	13.0944	3.54e-39	9.43e-38	clik-1
WBGene00010837	717.304	3.44014	0.286735	11.9976	3.66e-33	7.05e-32	M03B6.5
WBGene00011774	3948.05	3.43904	0.242712	14.1692	1.42e-45	5.46e-44	ttr-54
WBGene00011572	215.593	3.43845	0.708148	4.85554	1.2e-06	3.64e-06	mam-5
WBGene00019036	120.655	3.43839	0.344095	9.99257	1.64e-23	1.8e-22	irld-36
WBGene00003611	1209.75	3.43826	0.375294	9.16151	5.12e-20	4.57e-19	nhr-12
WBGene00018763	11535	3.435	0.194018	17.7045	3.87e-70	5.1e-68	F53F10.1
WBGene00022745	22605.8	3.43488	0.346968	9.89972	4.17e-23	4.47e-22	ZK470.2
WBGene00000256	19.5285	3.43349	0.972384	3.531	0.00041399	0.000914922	bli-6
WBGene00016413	16.2923	3.43259	1.05426	3.25593	0.0011302	0.00234279	C34F11.1
WBGene00009180	113775	3.42762	0.270398	12.6762	8.01e-37	1.88e-35	nurf-1
WBGene00017009	459.997	3.42016	0.32324	10.5809	3.66e-26	4.73e-25	D1007.13
WBGene00006819	136955	3.41534	0.214254	15.9406	3.31e-57	2.28e-55	unc-87
WBGene00002254	33388.5	3.40968	0.254849	13.3792	8e-41	2.33e-39	lbp-2
WBGene00016042	7.94319	3.40963	1.55459	2.19327	0.028288	0.0459265	C24A11.5
WBGene00019880	4671.84	3.40913	0.249146	13.6833	1.28e-42	4.13e-41	R05D3.6
WBGene00016539	16400.5	3.40907	0.316632	10.7666	4.95e-27	6.71e-26	madd-2
WBGene00016513	28763.1	3.40743	0.206214	16.5238	2.47e-61	2.08e-59	C38C3.4
WBGene00043050	5535.52	3.40652	0.200806	16.9642	1.51e-64	1.5e-62	oig-4
WBGene00019406	12.6002	3.40436	1.14644	2.96951	0.00298277	0.00577625	acdh-8
WBGene00021036	22151.2	3.40006	0.25941	13.1069	3.01e-39	8.02e-38	W05F2.4
WBGene00044477	260	3.39403	0.447952	7.57677	3.54e-14	2.11e-13	F49F1.14
WBGene00219272	8.82206	3.39188	1.26828	2.6744	0.00748629	0.013548	C17C3.24
WBGene00003934	234758	3.39175	0.23815	14.2421	5.02e-46	1.98e-44	pat-10
WBGene00019299	786.476	3.38716	0.369917	9.15654	5.36e-20	4.78e-19	snai-1
WBGene00002140	3606.68	3.387	0.240393	14.0894	4.41e-45	1.66e-43	inx-18
WBGene00011474	65988.6	3.38601	0.235388	14.3848	6.44e-47	2.67e-45	aldo-1
WBGene00016111	1445.73	3.38358	0.343015	9.86422	5.95e-23	6.31e-22	C25H3.1
WBGene00008897	594.879	3.38349	0.438936	7.70839	1.27e-14	7.86e-14	F16H6.7
WBGene00005228	902.338	3.38104	0.438496	7.71053	1.25e-14	7.73e-14	srh-2
WBGene00008188	74.4777	3.37882	0.533382	6.33471	2.38e-10	1.03e-09	clec-115
WBGene00020145	12.3602	3.37793	1.41177	2.39269	0.0167254	0.0283884	got-1.1
WBGene00001889	329.827	3.37731	0.44343	7.61633	2.61e-14	1.57e-13	his-15
WBGene00001890	108.732	3.37462	0.433691	7.78117	7.19e-15	4.51e-14	his-16
WBGene00017909	3545.77	3.37252	0.352732	9.56114	1.16e-21	1.15e-20	F28H1.4
WBGene00007155	20371.8	3.36789	0.219331	15.3553	3.26e-53	1.84e-51	B0379.1
WBGene00020881	154.168	3.36727	0.43259	7.78398	7.03e-15	4.42e-14	T28A11.19
WBGene00003597	14266.1	3.36629	0.283458	11.8758	1.58e-32	2.96e-31	nhl-1
WBGene00021509	9299.13	3.36143	0.198402	16.9425	2.19e-64	2.15e-62	Y41D4A.7
WBGene00195185	1983.08	3.35977	0.238186	14.1057	3.51e-45	1.32e-43	F19G12.9
WBGene00006822	7389.58	3.3543	0.294407	11.3934	4.51e-30	7.3e-29	unc-93
WBGene00020846	3437.56	3.35097	0.456072	7.34745	2.02e-13	1.13e-12	T27A10.6
WBGene00008510	5607.79	3.34829	0.171938	19.4738	1.83e-84	5.73e-82	lipl-7
WBGene00004129	1916.56	3.34014	0.240277	13.9012	6.23e-44	2.2e-42	pqn-42
WBGene00014207	16853.3	3.33959	0.235585	14.1757	1.3e-45	5e-44	ZK1058.9
WBGene00003249	4262.56	3.33928	0.344994	9.67924	3.69e-22	3.74e-21	mig-18
WBGene00008248	659.546	3.33906	0.363048	9.19729	3.67e-20	3.3e-19	srsx-27
WBGene00011790	60.703	3.33884	0.508581	6.56502	5.2e-11	2.39e-10	T15H9.5
WBGene00077728	78.6938	3.33701	0.386962	8.62361	6.49e-18	5.1e-17	T23G11.11
WBGene00017038	1995.93	3.33142	0.279597	11.915	9.88e-33	1.87e-31	dmsr-4
WBGene00016918	20022.8	3.32829	0.20254	16.4327	1.12e-60	8.91e-59	test-1
WBGene00016575	5307.74	3.32821	0.272906	12.1954	3.29e-34	6.77e-33	lido-10
WBGene00017342	12138.6	3.3259	0.277755	11.9742	4.85e-33	9.3e-32	F10D7.5
WBGene00009108	8.71288	3.32503	1.1688	2.84482	0.0044437	0.00837322	F25D1.3
WBGene00018273	303.295	3.32395	0.371645	8.9439	3.76e-19	3.16e-18	F41C3.7
WBGene00044525	63.6789	3.3206	0.704356	4.71438	2.42e-06	7.1e-06	Y73C8B.5
WBGene00022100	11320.7	3.31481	0.281834	11.7616	6.16e-32	1.12e-30	Y69A2AR.31
WBGene00017978	23.0789	3.31407	1.10787	2.99139	0.00277711	0.00540212	msrp-1
WBGene00022507	37.8432	3.3123	0.632555	5.23637	1.64e-07	5.41e-07	ZC21.8
WBGene00014130	165.488	3.30456	0.446418	7.40239	1.34e-13	7.63e-13	ZK892.6
WBGene00012219	114.615	3.30326	0.480062	6.8809	5.95e-12	2.96e-11	W03C9.1
WBGene00016497	44.6873	3.30054	0.669348	4.93098	8.18e-07	2.52e-06	vps-32.2
WBGene00044283	5317.17	3.30006	0.238419	13.8414	1.43e-43	4.95e-42	spp-22
WBGene00005423	138.999	3.2931	0.383719	8.58208	9.32e-18	7.23e-17	srh-213
WBGene00003095	180.098	3.29168	0.306709	10.7322	7.18e-27	9.65e-26	lys-6
WBGene00044032	468.642	3.29029	0.238727	13.7827	3.24e-43	1.09e-41	ceh-99
WBGene00007763	439.051	3.28655	0.285416	11.515	1.11e-30	1.86e-29	C27B7.6
WBGene00021042	222.372	3.28565	0.296465	11.0827	1.52e-28	2.26e-27	btb-5
WBGene00010142	228.015	3.28437	0.550612	5.96494	2.45e-09	9.71e-09	F56A8.8
WBGene00017127	23478.8	3.28301	0.311218	10.5489	5.14e-26	6.58e-25	E04F6.8
WBGene00000114	364654	3.28125	0.215574	15.221	2.57e-52	1.4e-50	alh-8
WBGene00006672	36579.7	3.28007	0.198831	16.4968	3.87e-61	3.19e-59	twk-18
WBGene00018347	132.731	3.27604	0.380847	8.60198	7.84e-18	6.11e-17	F42C5.5
WBGene00014116	30.1359	3.2753	0.704922	4.64633	3.38e-06	9.71e-06	ZK858.2
WBGene00009221	148692	3.27263	1.0801	3.02994	0.002446	0.00480494	acs-2
WBGene00007563	218.024	3.27147	0.235788	13.8746	9.03e-44	3.17e-42	C14A4.13
WBGene00009361	961.245	3.26007	0.379729	8.58525	9.06e-18	7.03e-17	F33E2.5
WBGene00011540	964.25	3.25798	0.374162	8.7074	3.11e-18	2.49e-17	T06E6.10
WBGene00017563	33418.3	3.25768	0.408923	7.96648	1.63e-15	1.08e-14	F18C5.10
WBGene00006863	36171.2	3.25524	0.287093	11.3387	8.44e-30	1.35e-28	gyg-1
WBGene00006760	27826.1	3.25173	0.334193	9.73008	2.24e-22	2.3e-21	unc-23
WBGene00003370	453461	3.25073	0.237706	13.6754	1.42e-42	4.59e-41	mlc-2
WBGene00003601	225.007	3.24989	0.506119	6.4212	1.35e-10	5.97e-10	nhr-2
WBGene00020330	2652.69	3.24926	0.268227	12.1138	8.92e-34	1.79e-32	T07H6.1
WBGene00022581	16.5128	3.24641	0.782802	4.14717	3.37e-05	8.58e-05	ZC262.4
WBGene00013568	394.84	3.24483	0.40956	7.92273	2.32e-15	1.52e-14	Y75B12B.3
WBGene00021163	748.194	3.24467	0.237875	13.6402	2.31e-42	7.27e-41	nhr-275
WBGene00009501	15.7897	3.24422	1.19366	2.71789	0.00657004	0.0120203	F37A8.1
WBGene00019332	24700	3.24286	0.244959	13.2384	5.27e-40	1.47e-38	K02F3.9
WBGene00010380	44.313	3.23963	0.756438	4.28274	1.85e-05	4.87e-05	mpst-2
WBGene00014008	232.89	3.23895	0.611206	5.29929	1.16e-07	3.89e-07	ZK596.3
WBGene00010432	1179	3.23889	0.31487	10.2864	8.11e-25	9.63e-24	H39E23.2
WBGene00004905	4893.93	3.23838	0.372598	8.69136	3.58e-18	2.86e-17	snf-6
WBGene00044799	155.709	3.23763	0.298246	10.8556	1.88e-27	2.59e-26	ZK686.6
WBGene00019721	110.499	3.23502	0.579292	5.58444	2.34e-08	8.47e-08	M01H9.5
WBGene00008392	8602.47	3.23399	0.258987	12.4871	8.78e-36	1.97e-34	D1086.5
WBGene00086569	3111.51	3.23108	0.186032	17.3684	1.43e-67	1.61e-65	F38A6.5
WBGene00018271	31199.3	3.23051	0.285171	11.3283	9.5e-30	1.51e-28	ctsa-1.1
WBGene00003931	8793.79	3.2292	0.296884	10.877	1.48e-27	2.06e-26	pat-4
WBGene00003893	115891	3.22817	0.282563	11.4246	3.15e-30	5.14e-29	ost-1
WBGene00022397	5800.3	3.22612	0.296518	10.88	1.44e-27	2e-26	Y97E10AR.2
WBGene00044698	17246.5	3.22554	0.277939	11.6052	3.88e-31	6.68e-30	K09F5.6
WBGene00006771	48618.7	3.22499	0.324131	9.94963	2.53e-23	2.75e-22	tln-1
WBGene00001886	189.92	3.22455	0.45806	7.03957	1.93e-12	1e-11	his-12
WBGene00011374	16293.3	3.22111	0.208695	15.4346	9.58e-54	5.56e-52	T02D1.8
WBGene00015137	10187.6	3.21955	0.270801	11.889	1.35e-32	2.54e-31	B0310.1
WBGene00022026	13809.5	3.21869	0.195824	16.4366	1.05e-60	8.38e-59	Y65B4A.2
WBGene00009548	16.5461	3.21811	1.11304	2.89128	0.00383671	0.0073074	F38H4.4
WBGene00012875	11756.6	3.2139	0.155783	20.6306	1.46e-94	7.29e-92	Y45F10B.13
WBGene00008894	10.838	3.21309	1.43229	2.24333	0.0248757	0.0408488	F16H6.4
WBGene00017979	25619.9	3.21276	0.229856	13.9773	2.15e-44	7.76e-43	F32B5.6
WBGene00006984	8230.46	3.21243	0.217503	14.7696	2.3e-49	1.07e-47	zig-7
WBGene00019735	89.2011	3.21207	0.477081	6.73277	1.66e-11	7.98e-11	M02F4.1
WBGene00206371	295.448	3.21073	0.460398	6.97383	3.08e-12	1.57e-11	F28B12.6
WBGene00022203	829.324	3.21072	0.331399	9.68837	3.38e-22	3.43e-21	Y73B3A.1
WBGene00044122	47.7065	3.20985	0.645217	4.97483	6.53e-07	2.03e-06	T28B8.6
WBGene00012383	61945.9	3.20846	0.286262	11.2081	3.72e-29	5.7e-28	ttr-17
WBGene00006135	25.6083	3.20829	0.683937	4.69092	2.72e-06	7.91e-06	str-74
WBGene00016626	2237.23	3.20516	0.281359	11.3917	4.6e-30	7.44e-29	clhm-1
WBGene00017375	1348.36	3.20288	0.278047	11.5192	1.06e-30	1.77e-29	pbo-6
WBGene00002198	1522.2	3.20273	0.364408	8.78884	1.51e-18	1.23e-17	kin-14
WBGene00007126	8245.14	3.19753	0.327114	9.77498	1.44e-22	1.49e-21	dhcr-7
WBGene00022582	3104.96	3.19695	0.238943	13.3796	7.96e-41	2.32e-39	R05D3.6
WBGene00008423	141.105	3.19081	0.456941	6.98297	2.89e-12	1.48e-11	D2045.5
WBGene00020260	4881.83	3.19025	0.299679	10.6456	1.83e-26	2.39e-25	T05E7.4
WBGene00021271	166.185	3.19021	0.304138	10.4893	9.67e-26	1.22e-24	spe-47
WBGene00001564	378460	3.18988	0.668523	4.77153	1.83e-06	5.43e-06	icl-1
WBGene00007419	3577.88	3.18514	0.351902	9.05121	1.41e-19	1.23e-18	C07E3.9
WBGene00001000	43585.2	3.18485	0.322442	9.87726	5.22e-23	5.57e-22	dim-1
WBGene00235391	6.00679	3.18271	1.32343	2.4049	0.0161769	0.0275341	F38A5.22
WBGene00022180	6504.08	3.18167	0.391501	8.12685	4.41e-16	3.03e-15	Y71H2AM.15
WBGene00012648	1181.94	3.17893	0.499726	6.36136	2e-10	8.69e-10	Y39A1A.9
WBGene00016252	152.827	3.17711	0.342096	9.28719	1.58e-20	1.45e-19	C30E1.3
WBGene00007024	20297.4	3.1763	0.369019	8.60742	7.47e-18	5.84e-17	plin-1
WBGene00044081	9.8453	3.17408	1.43236	2.21598	0.0266932	0.0435696	D1086.11
WBGene00006321	22129.9	3.17344	0.240179	13.2128	7.4e-40	2.04e-38	sup-12
WBGene00008395	8947.04	3.16936	0.202551	15.6472	3.47e-55	2.13e-53	D1086.8
WBGene00019727	11871.6	3.16893	0.228802	13.8501	1.27e-43	4.41e-42	zig-12
WBGene00006977	1123.25	3.16876	0.233418	13.5755	5.6e-42	1.72e-40	zif-1
WBGene00003376	568.606	3.16678	0.303664	10.4286	1.84e-25	2.26e-24	mls-1
WBGene00015633	9620.28	3.16522	0.260786	12.1372	6.7e-34	1.36e-32	C09D4.2
WBGene00005971	321.85	3.16508	0.463971	6.82172	9e-12	4.42e-11	srx-80
WBGene00022761	35.8874	3.1625	0.490764	6.44405	1.16e-10	5.17e-10	ZK546.4
WBGene00006288	499.375	3.15927	0.462035	6.83772	8.05e-12	3.97e-11	str-262
WBGene00008269	68.1279	3.15753	0.433825	7.27834	3.38e-13	1.86e-12	C53A5.11
WBGene00010269	1730.14	3.15673	0.377212	8.36858	5.83e-17	4.27e-16	F58G1.7
WBGene00012291	9924.89	3.15543	0.256483	12.3027	8.76e-35	1.88e-33	W06A7.2
WBGene00020836	12680.3	3.15327	0.297952	10.5832	3.57e-26	4.62e-25	lgc-34
WBGene00002227	115.328	3.15197	0.459425	6.86069	6.85e-12	3.4e-11	klp-17
WBGene00044558	21.7843	3.15143	0.725997	4.34083	1.42e-05	3.79e-05	F56C3.10
WBGene00000676	21.2311	3.14832	1.30186	2.41832	0.0155924	0.0266299	col-102
WBGene00012960	2912.39	3.1467	0.214491	14.6706	9.95e-49	4.5e-47	Y47H10A.4
WBGene00000663	14.8778	3.14306	1.22676	2.56208	0.0104048	0.0183647	col-88
WBGene00000070	9932.13	3.14192	0.286371	10.9715	5.24e-28	7.55e-27	acy-3
WBGene00005661	108.601	3.13607	0.564872	5.55183	2.83e-08	1.01e-07	srr-10
WBGene00021968	38.9605	3.13536	0.672918	4.65935	3.17e-06	9.15e-06	Y57G7A.5
WBGene00015033	247.831	3.13297	0.318995	9.82139	9.11e-23	9.55e-22	B0207.10
WBGene00007919	10462.4	3.13257	0.256153	12.2293	2.17e-34	4.53e-33	cup-16
WBGene00194915	411.255	3.12954	0.277566	11.2749	1.75e-29	2.73e-28	JC8.16
WBGene00011331	16212.7	3.12872	0.195671	15.9897	1.51e-57	1.05e-55	T01E8.1
WBGene00013884	26219.1	3.12515	0.276075	11.3199	1.05e-29	1.66e-28	ZC412.3
WBGene00008389	22308.1	3.12452	0.247211	12.6391	1.29e-36	2.99e-35	D1086.2
WBGene00012252	4206.13	3.12446	0.393464	7.94092	2.01e-15	1.32e-14	W04E12.7
WBGene00001917	133.634	3.12221	0.460024	6.78704	1.14e-11	5.57e-11	his-12
WBGene00021974	1961.14	3.11918	0.215466	14.4765	1.71e-47	7.29e-46	Y57G7A.11
WBGene00001113	25571.2	3.11816	0.429974	7.25198	4.11e-13	2.25e-12	dur-1
WBGene00018055	84.9582	3.11794	0.706502	4.4132	1.02e-05	2.77e-05	F35F10.5
WBGene00006452	6923.22	3.11711	0.283704	10.9872	4.4e-28	6.38e-27	heh-1
WBGene00004451	218.132	3.1137	0.311242	10.0041	1.46e-23	1.61e-22	rpl-37
WBGene00000674	2421.82	3.11315	0.326132	9.54569	1.35e-21	1.33e-20	col-99
WBGene00016722	26083.2	3.1125	0.229088	13.5865	4.82e-42	1.49e-40	C46G7.2
WBGene00194886	92.3055	3.11107	0.387342	8.03183	9.6e-16	6.46e-15	C05B5.12
WBGene00018528	12.9947	3.10875	1.05909	2.9353	0.0033323	0.0064074	F47B3.4
WBGene00009658	26.6852	3.10651	0.886813	3.50301	0.000460036	0.00101053	F43G6.5
WBGene00017351	82.3222	3.10604	0.655201	4.7406	2.13e-06	6.28e-06	cutl-5
WBGene00017593	168.418	3.10602	0.326359	9.51719	1.78e-21	1.73e-20	F19C7.3
WBGene00000217	50883.3	3.10502	0.217034	14.3066	1.99e-46	7.99e-45	asp-4
WBGene00020381	369.29	3.10478	0.261163	11.8883	1.36e-32	2.56e-31	T09B4.7
WBGene00020106	7918.89	3.10416	0.249563	12.4384	1.62e-35	3.57e-34	R151.1
WBGene00004238	15732.9	3.10415	0.20922	14.8367	8.48e-50	4.1e-48	ptr-24
WBGene00007981	10435.1	3.10361	0.240149	12.9237	3.31e-38	8.37e-37	glb-11
WBGene00003246	3465.31	3.10072	0.23731	13.0661	5.14e-39	1.35e-37	mig-14
WBGene00006584	34326.2	3.1006	0.282462	10.9771	4.93e-28	7.11e-27	tni-1
WBGene00007177	70.2839	3.1006	0.507117	6.11418	9.71e-10	3.98e-09	oac-1
WBGene00005000	7522.87	3.09965	0.238474	12.9978	1.26e-38	3.24e-37	spp-15
WBGene00006999	56907.3	3.09891	0.227816	13.6027	3.86e-42	1.2e-40	zyx-1
WBGene00011934	74.3121	3.09832	0.393295	7.87784	3.33e-15	2.15e-14	T22H2.4
WBGene00017128	21708.9	3.09807	0.560795	5.52442	3.31e-08	1.17e-07	E04F6.9
WBGene00012852	36.4981	3.09793	0.559793	5.53407	3.13e-08	1.11e-07	Y44A6D.1
WBGene00044486	22.3101	3.09374	0.748036	4.13582	3.54e-05	9e-05	Y54G2A.42
WBGene00008706	8673.97	3.09189	0.171693	18.0083	1.68e-72	2.59e-70	gba-3
WBGene00006634	19417.1	3.08986	0.257369	12.0056	3.32e-33	6.42e-32	tsp-8
WBGene00014092	19291.8	3.0867	0.438629	7.03716	1.96e-12	1.02e-11	ZK822.5
WBGene00017299	4205.7	3.08228	0.216206	14.2562	4.1e-46	1.62e-44	molo-1
WBGene00008802	1106.43	3.08079	0.377867	8.15312	3.55e-16	2.45e-15	acp-2
WBGene00013049	37.2186	3.07962	0.854699	3.60317	0.000314363	0.000706532	Y50E8A.6
WBGene00008770	1744.56	3.07814	0.260309	11.8249	2.9e-32	5.38e-31	F13G3.12
WBGene00020471	888.045	3.07691	0.357062	8.6173	6.85e-18	5.38e-17	pho-14
WBGene00016576	3684.47	3.07235	0.368738	8.33206	7.94e-17	5.75e-16	lido-9
WBGene00004393	1848.04	3.07233	0.260007	11.8163	3.21e-32	5.94e-31	rnt-1
WBGene00020531	115.856	3.07161	0.408464	7.51992	5.48e-14	3.22e-13	T15B12.2
WBGene00021596	595.33	3.06785	0.39061	7.85401	4.03e-15	2.58e-14	spsb-2
WBGene00003991	3001.03	3.06441	0.431125	7.10794	1.18e-12	6.22e-12	pfn-3
WBGene00013698	802.094	3.06368	0.272872	11.2276	2.99e-29	4.6e-28	Y106G6D.1
WBGene00021891	7.36056	3.06236	1.22565	2.49857	0.0124697	0.0217049	Y54G2A.27
WBGene00000631	670.89	3.06156	0.381071	8.0341	9.43e-16	6.35e-15	col-54
WBGene00011573	9165.54	3.06126	0.451467	6.78068	1.2e-11	5.81e-11	anmt-3
WBGene00020195	21705.7	3.05993	0.202877	15.0827	2.11e-51	1.1e-49	T03G6.3
WBGene00005134	6.23231	3.05992	1.3548	2.25857	0.02391	0.0393779	srd-56
WBGene00018675	496.07	3.05658	0.399368	7.65352	1.96e-14	1.19e-13	F52C9.5
WBGene00016997	17378.5	3.05583	0.487599	6.2671	3.68e-10	1.56e-09	cebp-1
WBGene00021983	7730.42	3.05572	0.233416	13.0913	3.69e-39	9.81e-38	npr-5
WBGene00195250	129.329	3.05119	0.347296	8.78556	1.56e-18	1.27e-17	C13C4.8
WBGene00009531	12492.8	3.04994	0.278247	10.9612	5.87e-28	8.42e-27	F38B2.4
WBGene00019801	9127.74	3.03398	0.430917	7.04074	1.91e-12	9.92e-12	aak-1
WBGene00008378	45.907	3.03111	0.517918	5.8525	4.84e-09	1.87e-08	ule-3
WBGene00016039	224.891	3.02897	0.328149	9.23047	2.69e-20	2.44e-19	C24A8.5
WBGene00018993	32.113	3.02815	0.671625	4.50869	6.52e-06	1.81e-05	nhr-266
WBGene00000598	24.286	3.02624	0.833202	3.63206	0.000281171	0.000635612	col-9
WBGene00014032	21.8885	3.02253	1.11709	2.70571	0.0068158	0.0124335	ZK637.15
WBGene00008272	126.233	3.02204	0.534219	5.65693	1.54e-08	5.67e-08	C53B4.2
WBGene00011879	3849.28	3.02112	0.283632	10.6515	1.71e-26	2.25e-25	pho-7
WBGene00005591	79.9532	3.02105	0.411882	7.33476	2.22e-13	1.24e-12	srj-1
WBGene00008998	1499.36	3.02058	0.3663	8.24619	1.64e-16	1.16e-15	ncs-4
WBGene00013811	25.1231	3.01782	0.913319	3.30423	0.00095237	0.00199659	Y116A8C.38
WBGene00018870	22.5172	3.01553	0.790717	3.81367	0.00013692	0.000323518	F55C12.2
WBGene00000286	22380.3	3.01505	0.344762	8.74532	2.22e-18	1.79e-17	cal-2
WBGene00194793	37.1982	3.01474	0.54174	5.56491	2.62e-08	9.42e-08	W04G3.13
WBGene00017532	57.2914	3.01444	0.805444	3.74258	0.000182144	0.000423748	ent-5
WBGene00008040	22059.1	3.00923	0.241348	12.4684	1.11e-35	2.47e-34	ttr-5
WBGene00010447	192.119	3.00623	0.421426	7.13349	9.79e-13	5.2e-12	K01A6.5
WBGene00002976	4542.89	3.00551	0.356052	8.44122	3.14e-17	2.35e-16	lev-9
WBGene00008521	9985.69	3.00473	0.315131	9.53486	1.5e-21	1.47e-20	F02D8.4
WBGene00010187	752.042	3.00214	0.306865	9.78326	1.33e-22	1.38e-21	F57B1.1
WBGene00044200	199.918	3.00109	0.487519	6.15585	7.47e-10	3.09e-09	H37A05.4
WBGene00206479	32.133	2.99797	0.567816	5.27982	1.29e-07	4.31e-07	C44C11.6
WBGene00017149	5489.61	2.9977	0.373332	8.02959	9.78e-16	6.57e-15	EGAP4.1
WBGene00019640	107.86	2.99577	0.417563	7.17443	7.26e-13	3.89e-12	dos-2
WBGene00016212	3569.86	2.9951	0.217472	13.7724	3.74e-43	1.26e-41	C29F5.3
WBGene00018712	49.3532	2.9941	0.604634	4.95192	7.35e-07	2.27e-06	F52G3.4
WBGene00020479	2183.91	2.99282	0.344187	8.69533	3.46e-18	2.76e-17	T13C2.3
WBGene00009377	19.0546	2.99238	0.633165	4.72607	2.29e-06	6.72e-06	F34D10.8
WBGene00022344	85.6647	2.99221	0.423732	7.06156	1.65e-12	8.6e-12	pals-40
WBGene00044664	29.0681	2.99062	0.807655	3.70285	0.000213195	0.000491116	F59A6.11
WBGene00002069	13152.8	2.98963	0.309555	9.65783	4.55e-22	4.59e-21	ikb-1
WBGene00001101	19302.5	2.98622	0.260841	11.4484	2.39e-30	3.94e-29	dsh-1
WBGene00013636	1860.98	2.9849	0.392616	7.6026	2.9e-14	1.74e-13	Y105C5A.13
WBGene00020200	9713.56	2.98235	0.272986	10.9249	8.76e-28	1.24e-26	T04A6.1
WBGene00004995	45032.6	2.98225	0.208752	14.2861	2.67e-46	1.07e-44	spp-10
WBGene00009356	91.1933	2.98046	0.671962	4.43547	9.19e-06	2.51e-05	F33A8.10
WBGene00011726	15156	2.97989	0.258297	11.5367	8.62e-31	1.46e-29	lpr-2
WBGene00010648	4445.82	2.9791	0.172264	17.2938	5.24e-67	5.79e-65	K08C7.6
WBGene00020895	4671.14	2.97868	0.28286	10.5306	6.24e-26	7.96e-25	plpp-1.2
WBGene00001894	140.718	2.97638	0.361937	8.22347	1.98e-16	1.39e-15	his-52
WBGene00009358	5382.96	2.97606	0.256004	11.625	3.07e-31	5.35e-30	F33C8.4
WBGene00016440	33.3921	2.97242	0.93237	3.18802	0.00143249	0.00292313	gipc-1
WBGene00022746	12.1359	2.97224	0.824356	3.60553	0.000311518	0.000700489	ZK470.4
WBGene00017780	100.418	2.96793	0.680198	4.36334	1.28e-05	3.44e-05	F25E2.2
WBGene00008768	5116.56	2.96391	0.238448	12.43	1.8e-35	3.95e-34	F13G3.10
WBGene00017866	4376.99	2.96363	0.232596	12.7415	3.47e-37	8.29e-36	stn-2
WBGene00003525	1274.29	2.96183	0.289917	10.2161	1.68e-24	1.95e-23	nas-6
WBGene00001188	4636.67	2.9612	0.275744	10.7389	6.68e-27	8.98e-26	egl-20
WBGene00002268	48545.6	2.95991	0.225522	13.1247	2.38e-39	6.38e-38	lec-5
WBGene00009304	11976.2	2.95782	0.256128	11.5482	7.54e-31	1.28e-29	eva-1
WBGene00016624	5219.19	2.95771	0.224374	13.182	1.11e-39	3.04e-38	hrpl-1
WBGene00045511	151.896	2.95625	0.322185	9.17565	4.49e-20	4.02e-19	F11A5.18
WBGene00008263	135.968	2.95591	0.583527	5.06559	4.07e-07	1.29e-06	C53A5.2
WBGene00009848	2716.61	2.95547	0.240236	12.3024	8.8e-35	1.88e-33	F48F5.6
WBGene00005211	104.833	2.953	0.579916	5.09212	3.54e-07	1.13e-06	srg-54
WBGene00001555	4879.67	2.95254	0.262907	11.2304	2.89e-29	4.47e-28	gcy-35
WBGene00003371	374482	2.95023	0.239401	12.3234	6.78e-35	1.46e-33	mlc-3
WBGene00023417	4241.91	2.94921	0.309754	9.52113	1.71e-21	1.67e-20	swm-1
WBGene00044391	91.4797	2.9478	0.644728	4.57216	4.83e-06	1.36e-05	C25H3.15
WBGene00002974	5074.03	2.94735	0.237166	12.4274	1.86e-35	4.07e-34	lev-1
WBGene00019511	8013.06	2.94295	0.344774	8.53588	1.39e-17	1.06e-16	lido-8
WBGene00006637	2314.46	2.94014	0.270039	10.8878	1.32e-27	1.84e-26	tsp-11
WBGene00018739	11490.4	2.93912	0.253997	11.5715	5.75e-31	9.81e-30	F53B1.8
WBGene00023408	16849.1	2.937	0.30353	9.67613	3.81e-22	3.85e-21	cex-2
WBGene00009721	12.6242	2.93465	0.732131	4.00837	6.11e-05	0.000151054	F45D3.1
WBGene00016210	5004.83	2.93163	0.294052	9.96976	2.07e-23	2.26e-22	C29F5.1
WBGene00009688	24287.7	2.92531	0.248777	11.7588	6.37e-32	1.16e-30	F44E5.1
WBGene00044605	3620.22	2.92502	0.223723	13.0743	4.62e-39	1.22e-37	ttr-36
WBGene00004213	16997.7	2.92421	0.22048	13.2629	3.8e-40	1.07e-38	ptp-1
WBGene00018236	41.8938	2.9225	0.524835	5.56841	2.57e-08	9.23e-08	fbxb-71
WBGene00004790	5094.88	2.92193	0.205416	14.2245	6.46e-46	2.54e-44	sgn-1
WBGene00017688	3888.02	2.92162	0.229848	12.7111	5.13e-37	1.22e-35	ttr-35
WBGene00009459	773.465	2.92123	0.321711	9.08027	1.08e-19	9.48e-19	F36A2.12
WBGene00013637	1952.72	2.91985	0.397376	7.34782	2.01e-13	1.13e-12	Y105C5A.13
WBGene00000860	22.0287	2.91958	0.905145	3.22554	0.00125736	0.00258923	cwp-2
WBGene00022801	5023.34	2.91937	0.152177	19.184	5.03e-82	1.37e-79	pcp-5
WBGene00016941	17.4991	2.91776	0.811051	3.5975	0.000321285	0.000721442	C55B6.5
WBGene00006547	46.404	2.91631	0.652456	4.46974	7.83e-06	2.15e-05	tbx-11
WBGene00006408	6699	2.91301	0.285	10.2211	1.6e-24	1.86e-23	tag-18
WBGene00077698	650.848	2.90945	0.646439	4.50073	6.77e-06	1.87e-05	lurp-4
WBGene00020366	18379.6	2.9081	0.32357	8.98757	2.53e-19	2.16e-18	acdh-10
WBGene00255598	103.486	2.90593	0.387976	7.48996	6.89e-14	4.02e-13	BE0003N10.6
WBGene00018251	371.98	2.90505	0.271922	10.6834	1.22e-26	1.61e-25	F40H3.3
WBGene00021897	2085.38	2.90435	0.381584	7.6113	2.71e-14	1.63e-13	ser-6
WBGene00003369	202283	2.90385	0.337235	8.61076	7.26e-18	5.68e-17	mlc-1
WBGene00016531	3308.07	2.90352	0.334344	8.68423	3.81e-18	3.03e-17	pcyt-2.2
WBGene00022655	44.2271	2.90175	0.611904	4.74216	2.11e-06	6.23e-06	srsx-40
WBGene00017822	59.8129	2.90137	0.464182	6.25049	4.09e-10	1.73e-09	clec-216
WBGene00001115	6030.45	2.89978	0.175937	16.4819	4.95e-61	4.05e-59	dyb-1
WBGene00206486	54.9531	2.89458	0.419627	6.89799	5.27e-12	2.64e-11	Y54F10BM.20
WBGene00008086	98.0509	2.89412	0.387048	7.47742	7.58e-14	4.4e-13	C44C10.5
WBGene00012452	5610.25	2.89373	0.327814	8.82738	1.07e-18	8.82e-18	Y17D7B.4
WBGene00002184	4349.59	2.89268	0.195804	14.7734	2.18e-49	1.01e-47	kel-1
WBGene00016414	10.7122	2.89073	1.26785	2.28003	0.0226059	0.0374242	C34F11.2
WBGene00005602	6293.72	2.88711	0.276838	10.4289	1.83e-25	2.26e-24	srj-14
WBGene00011968	71.4355	2.88648	0.434205	6.64773	2.98e-11	1.4e-10	T23G11.1
WBGene00017428	6823.84	2.88571	0.198166	14.5621	4.9e-48	2.15e-46	F13D11.3
WBGene00022519	8429.84	2.88316	0.261905	11.0084	3.48e-28	5.08e-27	ZC123.4
WBGene00006067	4740.92	2.87943	0.223365	12.8912	5.05e-38	1.27e-36	sto-5
WBGene00011978	11453.8	2.8772	0.28438	10.1174	4.62e-24	5.23e-23	T24B8.4
WBGene00013255	15911.7	2.87641	0.232079	12.3941	2.81e-35	6.12e-34	tric-1B.1
WBGene00002114	22.8808	2.87535	1.3126	2.19057	0.0284827	0.0462159	ins-31
WBGene00011479	5669.04	2.87519	0.231117	12.4404	1.58e-35	3.49e-34	T05E11.2
WBGene00008883	58.6143	2.87316	0.615269	4.66976	3.02e-06	8.73e-06	F16B12.7
WBGene00001882	36.4025	2.86782	0.496879	5.77167	7.85e-09	2.97e-08	his-8
WBGene00015293	15015	2.86668	0.314687	9.10964	8.27e-20	7.31e-19	C01C4.3
WBGene00000263	8609.3	2.86636	0.22163	12.9331	2.93e-38	7.44e-37	F23H11.5
WBGene00008964	357.31	2.8653	0.635686	4.50741	6.56e-06	1.82e-05	mltn-9
WBGene00010872	8355.05	2.86449	0.194752	14.7084	5.69e-49	2.6e-47	M05B5.4
WBGene00010593	9613.27	2.86377	0.338426	8.46203	2.63e-17	1.98e-16	gsnl-1
WBGene00021441	545.201	2.86231	0.19664	14.5561	5.34e-48	2.34e-46	Y39A3CL.3
WBGene00009156	198.211	2.85892	0.765248	3.73594	0.000187016	0.000434364	clec-196
WBGene00021510	4284.25	2.85879	0.275549	10.3749	3.23e-25	3.92e-24	frpr-19
WBGene00000047	2257.96	2.85715	0.394232	7.24738	4.25e-13	2.32e-12	acr-8
WBGene00013987	35.392	2.85487	0.492356	5.79838	6.7e-09	2.55e-08	ZK512.8
WBGene00022209	8.79179	2.85157	0.946176	3.01378	0.00258013	0.0050438	Y73B3A.7
WBGene00008563	924.468	2.85142	0.5789	4.92558	8.41e-07	2.59e-06	F07H5.13
WBGene00018783	39.4468	2.8497	0.51151	5.57115	2.53e-08	9.1e-08	cbs-2
WBGene00018926	26.3063	2.84732	0.707353	4.02532	5.69e-05	0.000141029	F56A11.6
WBGene00022102	109.685	2.84473	0.515984	5.51322	3.52e-08	1.25e-07	Y69F12A.1
WBGene00003515	91443.3	2.83964	0.494408	5.74352	9.27e-09	3.48e-08	myo-3
WBGene00008744	1908.6	2.83955	0.259516	10.9417	7.28e-28	1.04e-26	F13D12.10
WBGene00044741	33.39	2.83792	0.501766	5.65586	1.55e-08	5.7e-08	Y57G11C.52
WBGene00009880	9782.23	2.83667	0.209997	13.5082	1.4e-41	4.24e-40	F49C12.11
WBGene00000737	38.0116	2.83574	0.556004	5.10021	3.39e-07	1.08e-06	col-164
WBGene00007319	47.3005	2.83417	0.526596	5.38206	7.36e-08	2.52e-07	C05B5.1
WBGene00015689	7.91723	2.83399	0.953949	2.9708	0.00297029	0.00575356	spch-2
WBGene00023407	5313.48	2.83188	0.533504	5.30808	1.11e-07	3.72e-07	cex-1
WBGene00019998	10847.2	2.82912	0.223303	12.6694	8.74e-37	2.05e-35	R10H1.1
WBGene00018249	10273.7	2.8279	0.283753	9.96607	2.15e-23	2.34e-22	F40H3.1
WBGene00002990	5898.87	2.82711	0.234207	12.071	1.5e-33	2.97e-32	lin-1
WBGene00013683	13003	2.82404	0.331939	8.50771	1.77e-17	1.35e-16	zoo-1
WBGene00018196	23.631	2.82166	0.616489	4.57698	4.72e-06	1.33e-05	nep-13
WBGene00010675	963.328	2.82135	0.265927	10.6095	2.69e-26	3.5e-25	K08E7.8
WBGene00020230	12591.2	2.82064	0.350864	8.03913	9.05e-16	6.11e-15	nep-2
WBGene00045484	107.54	2.81832	0.426053	6.61494	3.72e-11	1.73e-10	F34D10.9
WBGene00077563	29.3286	2.80565	0.562641	4.98658	6.15e-07	1.92e-06	peel-1
WBGene00009715	3437.5	2.80539	0.247882	11.3174	1.08e-29	1.7e-28	F44G4.6
WBGene00006893	7500.61	2.80075	0.390456	7.17303	7.34e-13	3.93e-12	spon-1
WBGene00000088	16017.1	2.7991	0.230481	12.1446	6.13e-34	1.24e-32	aex-5
WBGene00022014	4766.79	2.79903	0.263349	10.6286	2.19e-26	2.87e-25	Y61A9LA.1
WBGene00005518	454.977	2.79873	0.413592	6.76689	1.32e-11	6.37e-11	sri-6
WBGene00015407	3627.84	2.79764	0.319247	8.76327	1.9e-18	1.54e-17	C03H5.5
WBGene00020767	4120.83	2.79746	0.213052	13.1304	2.2e-39	5.92e-38	lgc-40
WBGene00006510	5145.79	2.79439	0.297577	9.39047	5.97e-21	5.61e-20	mtrr-1
WBGene00008285	21.8253	2.79085	0.940258	2.96817	0.00299578	0.00580044	C53D6.8
WBGene00012197	5814.68	2.7874	0.23585	11.8185	3.13e-32	5.79e-31	W02B8.1
WBGene00010888	6002.67	2.78691	0.261391	10.6618	1.54e-26	2.02e-25	dlc-2
WBGene00019497	2765.92	2.78527	0.234672	11.8688	1.72e-32	3.22e-31	K07E8.6
WBGene00020627	118.015	2.78238	0.418205	6.65314	2.87e-11	1.35e-10	T20F5.5
WBGene00206474	36.2446	2.78211	0.652229	4.26553	1.99e-05	5.23e-05	T22A3.12
WBGene00003024	4315.96	2.77995	0.291969	9.52137	1.71e-21	1.67e-20	lin-39
WBGene00017559	23.7369	2.7799	0.584933	4.75251	2.01e-06	5.94e-06	mpz-3
WBGene00018529	9.88823	2.7788	1.13301	2.45258	0.0141837	0.0243868	F47B3.5
WBGene00002978	237410	2.77728	0.310422	8.94678	3.66e-19	3.08e-18	lev-11
WBGene00012159	25.8346	2.77693	0.524709	5.29231	1.21e-07	4.04e-07	VY10G11R.1
WBGene00007924	14148.7	2.77595	0.243202	11.4142	3.55e-30	5.79e-29	rsu-1
WBGene00018310	832.326	2.77421	0.331506	8.36849	5.84e-17	4.27e-16	F41G4.7
WBGene00014084	8.38231	2.77346	0.964603	2.87524	0.0040372	0.00766397	snb-7
WBGene00018782	47389.4	2.77279	0.22017	12.5939	2.28e-36	5.24e-35	cct-3
WBGene00000118	32217	2.77196	0.177499	15.6168	5.59e-55	3.41e-53	alh-12
WBGene00001896	143.234	2.76547	0.357086	7.74455	9.59e-15	5.97e-14	his-52
WBGene00021871	261.493	2.76461	0.334865	8.25587	1.51e-16	1.07e-15	dml-1
WBGene00012907	33827.5	2.76336	0.315959	8.74595	2.21e-18	1.79e-17	cpt-1
WBGene00015590	781.864	2.76221	0.223037	12.3846	3.17e-35	6.87e-34	bath-15
WBGene00012146	2696.84	2.76097	0.27664	9.98037	1.86e-23	2.03e-22	B0393.8
WBGene00017752	53.2707	2.75983	0.729695	3.78216	0.000155472	0.000364672	sdz-15
WBGene00016266	23411.8	2.75974	0.288459	9.56717	1.1e-21	1.08e-20	idhg-2
WBGene00013273	10206.8	2.7591	0.242046	11.3991	4.23e-30	6.86e-29	2021-03-05
WBGene00011026	10877	2.75908	0.280902	9.82225	9.03e-23	9.48e-22	R05D7.1
WBGene00009714	66.8566	2.75524	0.620847	4.43788	9.08e-06	2.48e-05	F44G4.5
WBGene00006412	9128.53	2.75011	0.259964	10.5788	3.74e-26	4.83e-25	nlg-1
WBGene00018989	2541.4	2.74915	0.179574	15.3093	6.63e-53	3.68e-51	F56F11.2
WBGene00000857	4269.56	2.74685	0.226089	12.1494	5.78e-34	1.17e-32	cwn-1
WBGene00017600	3746.29	2.74606	0.266492	10.3045	6.73e-25	8.02e-24	ttr-10
WBGene00010599	19.2855	2.74429	0.846181	3.24314	0.00118219	0.00244335	K06B4.4
WBGene00014088	40760.5	2.74413	0.243616	11.2642	1.97e-29	3.08e-28	ZK809.8
WBGene00020860	12.6304	2.7438	0.949803	2.8888	0.00386711	0.00736157	nspd-10
WBGene00043120	35.8479	2.74033	0.532604	5.14516	2.67e-07	8.62e-07	C09H10.4
WBGene00044239	381.266	2.73807	0.323272	8.46988	2.46e-17	1.85e-16	C33D9.10
WBGene00044427	124.411	2.7339	0.347205	7.87402	3.43e-15	2.21e-14	F56A6.5
WBGene00008912	440.052	2.73219	0.477754	5.71882	1.07e-08	4e-08	F17C8.7
WBGene00012920	659.375	2.732	0.440534	6.20157	5.59e-10	2.33e-09	alkb-7
WBGene00006701	18572.8	2.7316	0.188034	14.5272	8.15e-48	3.52e-46	ubc-1
WBGene00000936	7894.56	2.73101	0.297027	9.19447	3.77e-20	3.39e-19	dbl-1
WBGene00017639	5132.31	2.73073	0.202118	13.5106	1.35e-41	4.11e-40	F20D6.10
WBGene00003124	5782.33	2.72856	0.266364	10.2437	1.26e-24	1.48e-23	mai-1
WBGene00017050	30.6812	2.7277	0.94292	2.89282	0.00381801	0.00727425	D2024.1
WBGene00044401	3100.74	2.72677	0.223514	12.1995	3.13e-34	6.46e-33	Y55B1BR.6
WBGene00006784	9724.6	2.72676	0.215676	12.6429	1.23e-36	2.85e-35	unc-49
WBGene00022752	160.752	2.72486	0.423558	6.43328	1.25e-10	5.54e-10	ZK484.6
WBGene00007173	2571.29	2.72426	0.284248	9.58409	9.33e-22	9.25e-21	B0393.8
WBGene00015741	1072.79	2.72392	0.210622	12.9328	2.94e-38	7.46e-37	C13F10.1
WBGene00015177	4031.6	2.72346	0.356852	7.6319	2.31e-14	1.4e-13	tmc-2
WBGene00019771	3465.61	2.72309	0.315521	8.63047	6.11e-18	4.81e-17	M04F3.5
WBGene00011407	3073.42	2.72267	0.407413	6.68283	2.34e-11	1.11e-10	ppat-1
WBGene00013747	16.352	2.7218	0.797739	3.4119	0.000645125	0.00138509	spe-19
WBGene00008371	15790	2.7199	0.23335	11.6559	2.14e-31	3.76e-30	D1054.3
WBGene00003394	528.033	2.71966	0.235872	11.5303	9.29e-31	1.57e-29	mom-1
WBGene00022116	33.1656	2.7182	0.477485	5.69273	1.25e-08	4.64e-08	Y71F9AL.11
WBGene00007139	6700.86	2.71776	0.304377	8.92893	4.3e-19	3.61e-18	mnp-1
WBGene00013310	98.2838	2.71671	0.372891	7.28552	3.2e-13	1.77e-12	Y57G11C.14
WBGene00019624	5146.49	2.71642	0.212911	12.7585	2.8e-37	6.71e-36	rnst-2
WBGene00017724	5544.57	2.71381	0.389792	6.96219	3.35e-12	1.7e-11	F22F7.7
WBGene00005017	40.3531	2.71346	0.996821	2.72211	0.00648665	0.0118764	sqt-2
WBGene00016612	33.7753	2.71338	0.48689	5.57287	2.51e-08	9.02e-08	C43G2.3
WBGene00019436	8361.59	2.71253	0.221615	12.2398	1.9e-34	3.99e-33	K06A9.2
WBGene00021493	3836.86	2.71106	0.274666	9.87041	5.59e-23	5.95e-22	Y40B10A.9
WBGene00001390	2381.6	2.71087	0.359303	7.5448	4.53e-14	2.68e-13	far-6
WBGene00012106	2059.86	2.70726	0.192789	14.0426	8.55e-45	3.17e-43	T27F6.7
WBGene00022077	5114.85	2.70639	0.237253	11.4072	3.85e-30	6.26e-29	vamp-7
WBGene00022395	50.2274	2.70639	0.419792	6.44697	1.14e-10	5.08e-10	ceh-76
WBGene00044070	19304.2	2.70492	0.210718	12.8366	1.02e-37	2.52e-36	set-18
WBGene00011528	7013.13	2.70476	0.233379	11.5896	4.65e-31	7.98e-30	fndc-1
WBGene00020064	357.446	2.70381	0.322171	8.39248	4.76e-17	3.51e-16	kbp-1
WBGene00021439	6753.66	2.70319	0.206634	13.082	4.17e-39	1.11e-37	ckr-2
WBGene00019926	26.0698	2.7016	0.969682	2.78607	0.00533512	0.00991803	fbxc-27
WBGene00010877	5311.46	2.69965	0.463966	5.81865	5.93e-09	2.27e-08	lact-4
WBGene00017681	1524.44	2.69842	0.300704	8.97365	2.87e-19	2.44e-18	slc-17.5
WBGene00022343	17.2372	2.69141	0.734473	3.6644	0.000247914	0.00056497	Y82E9BR.10
WBGene00013223	8999	2.69035	0.366434	7.34197	2.1e-13	1.18e-12	efa-6
WBGene00021589	536.122	2.68957	0.29641	9.07383	1.15e-19	1e-18	Y46D2A.1
WBGene00008870	31.6036	2.68587	0.671205	4.00157	6.29e-05	0.00015524	F15H9.1
WBGene00077684	78.9722	2.68565	0.546043	4.91837	8.73e-07	2.68e-06	Y26D4A.21
WBGene00020679	82049.8	2.68487	0.247988	10.8266	2.58e-27	3.53e-26	ogdh-1
WBGene00008275	3421.82	2.68442	0.29551	9.08402	1.05e-19	9.17e-19	nstp-1
WBGene00007796	477.349	2.68438	0.239179	11.2233	3.13e-29	4.82e-28	C28D4.10
WBGene00022011	13.1298	2.67744	0.860218	3.11251	0.00185504	0.00371668	Y59H11AR.3
WBGene00011027	416.895	2.67642	0.262023	10.2144	1.71e-24	1.98e-23	R05D7.2
WBGene00010488	10678.3	2.6731	0.165708	16.1314	1.54e-58	1.13e-56	endu-1
WBGene00021676	1798.89	2.67153	0.252112	10.5966	3.09e-26	4.01e-25	pid-2
WBGene00001942	88.0101	2.66937	0.445624	5.99018	2.1e-09	8.37e-09	his-68
WBGene00010649	1990.02	2.6682	0.261519	10.2027	1.93e-24	2.23e-23	K08C7.7
WBGene00019203	8790.49	2.6677	0.22333	11.9451	6.89e-33	1.31e-31	ttr-47
WBGene00010856	2899.86	2.66522	0.169571	15.7174	1.15e-55	7.19e-54	M04C9.1
WBGene00012409	24.0072	2.66485	0.646957	4.11906	3.8e-05	9.65e-05	Y7A5A.3
WBGene00022352	36.7572	2.66197	0.587408	4.53173	5.85e-06	1.63e-05	Y82E9BR.20
WBGene00001928	131.148	2.66167	0.345109	7.71256	1.23e-14	7.61e-14	his-54
WBGene00020884	11838.5	2.66163	0.164679	16.1625	9.27e-59	6.91e-57	T28B4.1
WBGene00012662	1094.19	2.65966	0.214585	12.3944	2.8e-35	6.1e-34	Y39A1C.1
WBGene00016084	332.371	2.65933	0.570345	4.66266	3.12e-06	9.02e-06	cht-3
WBGene00009462	167.316	2.65877	0.558111	4.76388	1.9e-06	5.63e-06	sre-22
WBGene00008409	2722.6	2.65874	0.540457	4.91943	8.68e-07	2.67e-06	mpst-1
WBGene00004113	10730.4	2.65802	0.251661	10.5619	4.47e-26	5.76e-25	pqn-24
WBGene00022823	4919.24	2.65758	0.243513	10.9135	9.94e-28	1.4e-26	ZK813.4
WBGene00006987	2379.37	2.6572	0.287332	9.24785	2.29e-20	2.08e-19	zmp-1
WBGene00008529	40.7984	2.65708	0.578613	4.59216	4.39e-06	1.24e-05	F02E9.3
WBGene00015334	3959.61	2.65598	0.26903	9.87245	5.48e-23	5.83e-22	sup-18
WBGene00015210	64.5741	2.65418	0.678589	3.91133	9.18e-05	0.000221748	B0496.1
WBGene00015351	53.777	2.65313	0.49501	5.35975	8.33e-08	2.84e-07	C02F5.10
WBGene00001603	17.0706	2.65294	0.739665	3.58668	0.000334915	0.000750028	gln-2
WBGene00006810	5333.33	2.64852	0.156241	16.9515	1.88e-64	1.85e-62	unc-78
WBGene00022766	6671.09	2.64794	0.230669	11.4794	1.67e-30	2.78e-29	cblc-1
WBGene00019904	13804.5	2.64765	0.245692	10.7763	4.45e-27	6.04e-26	twk-49
WBGene00012198	352.364	2.64696	0.395819	6.68731	2.27e-11	1.08e-10	W02B8.2
WBGene00020382	13654.7	2.64657	0.194526	13.6052	3.73e-42	1.16e-40	T09B4.8
WBGene00005150	165.645	2.64363	0.362919	7.28437	3.23e-13	1.79e-12	sre-2
WBGene00001174	1144.65	2.63692	0.309849	8.51036	1.73e-17	1.32e-16	egl-5
WBGene00010385	2018.16	2.63612	0.292915	8.9996	2.27e-19	1.94e-18	H12D21.9
WBGene00001926	124.733	2.63499	0.342317	7.69751	1.39e-14	8.54e-14	his-52
WBGene00021577	14.8899	2.63348	0.747718	3.52202	0.000428276	0.000944547	Y46B2A.2
WBGene00001880	45.9115	2.6334	0.597429	4.4079	1.04e-05	2.83e-05	his-59
WBGene00006169	22.3309	2.63037	0.652171	4.03325	5.5e-05	0.000136618	str-118
WBGene00004910	16250.3	2.63005	0.253118	10.3906	2.74e-25	3.34e-24	snf-11
WBGene00003520	274.281	2.62512	0.252532	10.3952	2.61e-25	3.19e-24	nas-1
WBGene00008854	21.7923	2.6244	0.79617	3.29628	0.000979733	0.00204995	F15D3.4
WBGene00012242	134.997	2.6244	0.387769	6.76795	1.31e-11	6.33e-11	srt-39
WBGene00009578	48269.8	2.6234	0.19182	13.6763	1.41e-42	4.54e-41	F40F8.5
WBGene00020187	69.7797	2.62288	0.413009	6.35066	2.14e-10	9.29e-10	gsp-4
WBGene00011288	487.624	2.62095	0.342918	7.64309	2.12e-14	1.29e-13	R102.1
WBGene00000228	40858	2.61975	0.330093	7.93641	2.08e-15	1.37e-14	atn-1
WBGene00019303	119.981	2.61958	0.5094	5.14248	2.71e-07	8.74e-07	K02D10.3
WBGene00009600	1350.61	2.6192	0.756457	3.46245	0.000535278	0.00116524	F40G12.5
WBGene00001031	29514	2.61779	0.255385	10.2504	1.18e-24	1.38e-23	dnj-13
WBGene00013801	77.0197	2.61677	0.528077	4.95528	7.22e-07	2.24e-06	Y116A8C.24
WBGene00001964	14.8037	2.61676	0.818775	3.19594	0.00139374	0.00284845	hlh-25
WBGene00000684	44.4203	2.61612	0.532349	4.91429	8.91e-07	2.74e-06	col-110
WBGene00000832	24148.1	2.6155	0.17358	15.068	2.63e-51	1.36e-49	ctn-1
WBGene00021984	4420.19	2.61415	0.212936	12.2767	1.21e-34	2.57e-33	Y59C2A.1
WBGene00014171	22274.7	2.61275	0.190617	13.7068	9.24e-43	3.02e-41	nep-26
WBGene00021355	33605.7	2.61158	0.238606	10.9452	7.01e-28	9.98e-27	Y37E3.17
WBGene00001793	22648.5	2.61003	0.313242	8.33231	7.93e-17	5.74e-16	gsy-1
WBGene00003860	1240	2.60954	0.265063	9.84497	7.21e-23	7.6e-22	oig-2
WBGene00008915	20113.9	2.60954	0.41071	6.35372	2.1e-10	9.11e-10	F17C11.4
WBGene00003740	3827.6	2.6093	0.290926	8.96892	2.99e-19	2.54e-18	nlp-2
WBGene00021161	6421.27	2.60754	0.278866	9.35052	8.72e-21	8.11e-20	Y4C6B.7
WBGene00001955	64718.4	2.60638	0.270094	9.64989	4.92e-22	4.95e-21	hlh-11
WBGene00018784	4021.98	2.60584	0.227361	11.4613	2.06e-30	3.41e-29	F54A3.5
WBGene00012987	10694.6	2.60363	0.187164	13.9109	5.44e-44	1.93e-42	Y48C3A.3
WBGene00006796	10462.7	2.60207	0.325836	7.98581	1.4e-15	9.3e-15	unc-62
WBGene00002130	29.3847	2.60183	0.827796	3.14308	0.00167179	0.00337384	inx-8
WBGene00015980	4181.73	2.598	0.228601	11.3648	6.26e-30	1.01e-28	C18G1.1
WBGene00009797	12968.6	2.59785	0.328462	7.90912	2.59e-15	1.68e-14	F46G10.2
WBGene00006826	15078.9	2.5939	0.316752	8.18906	2.63e-16	1.84e-15	unc-97
WBGene00004498	26631.3	2.59345	0.274977	9.43151	4.04e-21	3.84e-20	rps-29
WBGene00001404	22614.1	2.59036	0.430427	6.01812	1.76e-09	7.09e-09	fbp-1
WBGene00000425	904.536	2.58907	0.301698	8.58165	9.35e-18	7.25e-17	ced-11
WBGene00016160	14.5801	2.58771	0.877585	2.94867	0.00319144	0.00615493	C27D6.1
WBGene00008153	15.8059	2.5876	0.769469	3.36284	0.000771443	0.00163694	C47E12.10
WBGene00021080	1951.16	2.58654	0.249321	10.3744	3.24e-25	3.94e-24	W08A12.3
WBGene00002040	12026.6	2.58286	0.307955	8.38714	4.98e-17	3.67e-16	hum-7
WBGene00008447	646.92	2.58184	0.343302	7.52062	5.45e-14	3.2e-13	E01G4.5
WBGene00044526	57.2696	2.58115	0.585315	4.40984	1.03e-05	2.81e-05	T28A11.22
WBGene00009325	2666.37	2.57827	0.235775	10.9353	7.82e-28	1.11e-26	F32D8.15
WBGene00195246	19.9361	2.57809	0.765164	3.36933	0.000753521	0.00160088	ZK546.19
WBGene00017054	10424.2	2.57706	0.246962	10.435	1.72e-25	2.12e-24	gstk-2
WBGene00195146	48.0789	2.57554	0.54038	4.76617	1.88e-06	5.57e-06	F54D5.17
WBGene00010106	24.4934	2.5754	0.649878	3.9629	7.4e-05	0.000181052	fbxb-61
WBGene00008910	9924.54	2.57435	0.22191	11.6009	4.08e-31	7.02e-30	F17C8.3
WBGene00014108	15060	2.57357	0.268937	9.56942	1.08e-21	1.06e-20	ZK856.7
WBGene00005532	38.0322	2.57316	0.59222	4.34494	1.39e-05	3.72e-05	sri-20
WBGene00206377	131.477	2.57311	0.397624	6.47122	9.72e-11	4.36e-10	F44E5.15
WBGene00235129	17.6532	2.57178	0.752313	3.4185	0.000629678	0.00135386	ZC518.8
WBGene00016706	7411.41	2.56858	0.233914	10.9809	4.72e-28	6.83e-27	C46C11.3
WBGene00014127	16.1425	2.56764	1.07134	2.39667	0.016545	0.0281097	ZK892.3
WBGene00194642	304.13	2.56663	0.315423	8.1371	4.05e-16	2.79e-15	C25H3.17
WBGene00001909	16963.8	2.56509	0.475583	5.39358	6.91e-08	2.37e-07	his-35
WBGene00006765	3111.71	2.55995	0.208146	12.2988	9.19e-35	1.97e-33	unc-29
WBGene00008053	12020.2	2.55265	0.166273	15.3521	3.43e-53	1.93e-51	cdc-48.2
WBGene00007190	25.6474	2.55247	0.736177	3.46719	0.000525923	0.00114654	rmd-3
WBGene00003391	9164.47	2.55184	0.339838	7.50899	5.96e-14	3.48e-13	mog-3
WBGene00006663	13417.6	2.55123	0.403981	6.3152	2.7e-10	1.16e-09	twk-8
WBGene00010692	63.0001	2.54976	0.425605	5.9909	2.09e-09	8.34e-09	K08H2.5
WBGene00016319	836.134	2.54441	0.268327	9.4825	2.48e-21	2.39e-20	C32D5.12
WBGene00010879	13244.3	2.54396	0.331583	7.67219	1.69e-14	1.03e-13	M05D6.6
WBGene00017362	1479.23	2.54089	0.226294	11.2283	2.96e-29	4.57e-28	F10G2.1
WBGene00011460	51.5427	2.54024	0.954022	2.66266	0.00775258	0.0139995	ttr-14
WBGene00009645	2469.47	2.54001	0.280136	9.06703	1.22e-19	1.07e-18	F42G10.1
WBGene00020023	2058.65	2.53968	0.290451	8.74389	2.25e-18	1.82e-17	frpr-16
WBGene00206493	47.0367	2.53948	0.579501	4.38218	1.17e-05	3.17e-05	Y38H8A.12
WBGene00000772	297.92	2.53928	0.448921	5.65641	1.55e-08	5.68e-08	cpb-3
WBGene00020134	581.541	2.53732	0.277413	9.14637	5.89e-20	5.24e-19	T01B6.1
WBGene00011795	193.389	2.53708	0.320728	7.91039	2.57e-15	1.67e-14	T16A9.5
WBGene00011050	19028.1	2.53693	0.245787	10.3216	5.62e-25	6.73e-24	agl-1
WBGene00018207	135.083	2.53456	0.344687	7.35321	1.94e-13	1.09e-12	F39G3.2
WBGene00013455	2587.3	2.53275	0.236031	10.7306	7.31e-27	9.82e-26	ssu-2
WBGene00018999	252.944	2.53035	0.277982	9.10256	8.82e-20	7.77e-19	F57B9.8
WBGene00194866	41.9888	2.5285	0.503888	5.01798	5.22e-07	1.64e-06	Y41C4A.22
WBGene00022354	6262.68	2.52849	0.277009	9.12781	6.99e-20	6.2e-19	Y82E9BR.22
WBGene00022671	50.2699	2.52803	0.568581	4.44621	8.74e-06	2.39e-05	ZK177.3
WBGene00008139	2855.86	2.5274	0.466242	5.42079	5.93e-08	2.05e-07	C47D12.5
WBGene00015817	2205.02	2.52625	0.247421	10.2103	1.78e-24	2.07e-23	C16A11.4
WBGene00016988	3893.67	2.52487	0.193808	13.0277	8.51e-39	2.22e-37	CD4.1
WBGene00002255	3806.79	2.52163	0.349609	7.21271	5.48e-13	2.97e-12	lbp-3
WBGene00006662	13144.1	2.51902	0.244432	10.3056	6.65e-25	7.93e-24	twk-7
WBGene00020897	2102.62	2.51861	0.370926	6.79006	1.12e-11	5.46e-11	del-10
WBGene00017266	710.146	2.51694	0.363194	6.93002	4.21e-12	2.12e-11	F08F3.10
WBGene00044156	265.669	2.51539	0.483102	5.20675	1.92e-07	6.3e-07	Y66C5A.1
WBGene00004830	8011.99	2.51341	0.321798	7.81054	5.69e-15	3.6e-14	slo-1
WBGene00017922	29.3173	2.51064	0.832964	3.01411	0.00257734	0.00503921	F29B9.7
WBGene00185089	260.338	2.5093	0.344475	7.28444	3.23e-13	1.79e-12	C16A11.10
WBGene00006645	78.5325	2.50856	0.348376	7.20074	5.99e-13	3.24e-12	tsp-19
WBGene00011261	2458.37	2.50664	0.381155	6.57642	4.82e-11	2.22e-10	nphp-4
WBGene00021041	13.3344	2.50569	0.977094	2.56443	0.0103344	0.0182492	clp-10
WBGene00013107	95.8347	2.505	0.546702	4.58201	4.61e-06	1.3e-05	Y51H4A.13
WBGene00012854	7827.13	2.50267	0.155238	16.1215	1.8e-58	1.32e-56	Y44A6D.3
WBGene00007959	5571.24	2.49879	0.533902	4.68025	2.87e-06	8.31e-06	C35C5.10
WBGene00022233	22959.5	2.49842	0.353095	7.07576	1.49e-12	7.78e-12	ipla-6
WBGene00015313	525.33	2.49816	0.375307	6.65631	2.81e-11	1.32e-10	hpo-32
WBGene00012602	2361.51	2.49734	0.21956	11.3743	5.61e-30	9.06e-29	Y38E10A.24
WBGene00000285	9402.87	2.49724	0.2621	9.52779	1.61e-21	1.57e-20	cal-1
WBGene00013479	610.968	2.49709	0.264823	9.42928	4.13e-21	3.92e-20	Y69H2.1
WBGene00011736	41921	2.49677	0.343286	7.27315	3.51e-13	1.93e-12	T12D8.9
WBGene00021527	2535.12	2.49655	0.286384	8.71747	2.84e-18	2.28e-17	aakg-3
WBGene00018954	976.13	2.49608	0.285647	8.73835	2.37e-18	1.9e-17	F56C9.11
WBGene00019782	857.534	2.49582	0.520738	4.79285	1.64e-06	4.9e-06	M60.7
WBGene00021043	61685.2	2.49577	0.221119	11.287	1.52e-29	2.38e-28	pck-1
WBGene00001951	161.433	2.49374	0.334983	7.44439	9.74e-14	5.61e-13	hlh-4
WBGene00044197	52.5945	2.49104	0.564778	4.41065	1.03e-05	2.8e-05	fbxb-63
WBGene00009333	3667.94	2.48404	0.238581	10.4117	2.19e-25	2.69e-24	F32D8.10
WBGene00022770	1352.92	2.48299	0.308447	8.04997	8.28e-16	5.61e-15	acp-1
WBGene00022199	26009.7	2.48257	0.35443	7.00442	2.48e-12	1.27e-11	pfk-1.1
WBGene00020937	1978.86	2.48161	0.271496	9.1405	6.22e-20	5.54e-19	W02D3.12
WBGene00008965	25.3039	2.47183	0.952044	2.59635	0.00942213	0.0167538	mltn-10
WBGene00020391	35303.3	2.46982	0.234222	10.5448	5.37e-26	6.87e-25	cct-7
WBGene00014989	6983.25	2.46616	0.21071	11.7041	1.22e-31	2.16e-30	best-23
WBGene00009685	40.11	2.465	0.45126	5.46248	4.7e-08	1.64e-07	F44D12.8
WBGene00235277	31.4982	2.46401	0.770964	3.196	0.00139345	0.00284837	T04C4.3
WBGene00011279	9132.84	2.46386	0.287201	8.57887	9.58e-18	7.43e-17	asd-1
WBGene00016766	1854.64	2.46248	0.215045	11.451	2.32e-30	3.83e-29	C49C8.2
WBGene00016923	563.459	2.46162	0.681777	3.61059	0.000305503	0.000687993	C54F6.5
WBGene00003932	9916.77	2.45924	0.284103	8.65616	4.88e-18	3.86e-17	pat-6
WBGene00019035	31.6882	2.4588	0.845703	2.90741	0.00364441	0.00696884	fbxb-26
WBGene00006667	3476.15	2.45878	0.297528	8.26404	1.41e-16	1e-15	twk-12
WBGene00004467	10879.4	2.45766	0.206067	11.9265	8.61e-33	1.64e-31	rpn-11
WBGene00006593	6279.2	2.45597	0.338503	7.2554	4e-13	2.19e-12	tol-1
WBGene00012113	36756.3	2.45594	0.429748	5.71483	1.1e-08	4.09e-08	T28B8.1
WBGene00011466	112.633	2.45581	0.564139	4.3532	1.34e-05	3.59e-05	T05C12.1
WBGene00017297	4553.81	2.45541	0.17126	14.3374	1.28e-46	5.18e-45	F09E10.7
WBGene00000170	61301.7	2.45521	0.203689	12.0537	1.85e-33	3.64e-32	aqp-2
WBGene00255457	74.2158	2.45313	0.490762	4.99861	5.77e-07	1.8e-06	F23C8.14
WBGene00019842	3262.88	2.45277	0.197883	12.395	2.78e-35	6.06e-34	R02F11.4
WBGene00001131	32483.8	2.45273	0.410161	5.97991	2.23e-09	8.88e-09	dys-1
WBGene00006853	2379.54	2.45005	0.276665	8.85565	8.32e-19	6.88e-18	unc-130
WBGene00005938	115.572	2.44815	0.6087	4.02193	5.77e-05	0.000143012	srx-47
WBGene00017120	615.01	2.447	0.254267	9.62375	6.35e-22	6.35e-21	tctn-1
WBGene00014202	38331.3	2.44676	0.149964	16.3156	7.65e-60	5.9e-58	mmcm-1
WBGene00007096	1225.86	2.44642	0.208137	11.7539	6.74e-32	1.22e-30	B0024.3
WBGene00009819	1656.39	2.44555	0.309679	7.89702	2.86e-15	1.85e-14	F47B10.8
WBGene00004786	1072.16	2.44554	0.233987	10.4516	1.44e-25	1.79e-24	sex-1
WBGene00012164	837.709	2.44464	0.449319	5.44078	5.3e-08	1.84e-07	W01A8.2
WBGene00011313	127.4	2.44357	0.574035	4.25683	2.07e-05	5.43e-05	T01B7.8
WBGene00004398	34.7606	2.44075	0.967703	2.52221	0.0116622	0.0204065	rol-8
WBGene00206356	42.1633	2.44017	0.634954	3.84306	0.00012151	0.000289078	T08B2.15
WBGene00009889	292.945	2.43824	0.267169	9.12617	7.1e-20	6.29e-19	F49E11.2
WBGene00017160	6461.6	2.43463	0.360383	6.75569	1.42e-11	6.86e-11	F01F1.3
WBGene00011728	333.6	2.43409	0.312067	7.79989	6.2e-15	3.91e-14	T12A7.7
WBGene00003107	50.7188	2.43247	0.540107	4.50368	6.68e-06	1.85e-05	mab-10
WBGene00022805	2119.71	2.43235	0.331832	7.33006	2.3e-13	1.29e-12	nhr-256
WBGene00021558	1558.84	2.43182	0.201026	12.0971	1.09e-33	2.18e-32	Y45G5AM.6
WBGene00014094	163.375	2.4318	0.661599	3.67564	0.000237253	0.000542374	ZK829.3
WBGene00012103	446.838	2.4308	0.320067	7.59467	3.09e-14	1.85e-13	clec-12
WBGene00017538	47.1765	2.43037	0.797241	3.04848	0.00230004	0.00454	ceh-49
WBGene00007365	36565.4	2.42959	0.411139	5.90941	3.43e-09	1.34e-08	C06B3.6
WBGene00018834	6.18029	2.42887	1.03578	2.34496	0.0190292	0.0319446	F54F2.6
WBGene00001815	2675.54	2.42791	0.240645	10.0892	6.17e-24	6.94e-23	hmt-1
WBGene00004773	13520.2	2.42635	0.341714	7.10052	1.24e-12	6.55e-12	sem-4
WBGene00013925	5466.22	2.42548	0.146381	16.5696	1.16e-61	9.94e-60	coa-7
WBGene00044452	682.756	2.42471	0.230276	10.5296	6.31e-26	8.04e-25	Y102E9.5
WBGene00016330	6435.12	2.42331	0.682243	3.55198	0.000382342	0.000849984	C32E12.4
WBGene00001749	12747.9	2.42224	0.275447	8.79386	1.45e-18	1.18e-17	gst-1
WBGene00006127	119.451	2.42161	0.506047	4.78535	1.71e-06	5.08e-06	str-64
WBGene00017885	18290.9	2.41886	0.309608	7.81265	5.6e-15	3.55e-14	dip-2
WBGene00012891	6882.37	2.41799	0.287604	8.40738	4.19e-17	3.1e-16	sorb-1
WBGene00004458	13036.3	2.41763	0.251649	9.60712	7.46e-22	7.42e-21	rpn-1
WBGene00018701	40834.5	2.41451	0.205972	11.7225	9.77e-32	1.75e-30	pccb-1
WBGene00015409	834.617	2.4097	0.255395	9.4352	3.9e-21	3.71e-20	C03H5.7
WBGene00010703	11707.8	2.40883	0.35179	6.84736	7.52e-12	3.72e-11	K09A9.6
WBGene00014095	317673	2.40848	0.272647	8.83369	1.01e-18	8.35e-18	gdh-1
WBGene00007642	92.4211	2.40777	0.439275	5.48124	4.22e-08	1.48e-07	C17E4.2
WBGene00008572	6002.33	2.40761	0.295489	8.14788	3.7e-16	2.56e-15	F08B12.4
WBGene00011884	65625.7	2.40715	0.234466	10.2665	9.97e-25	1.18e-23	enol-1
WBGene00017374	13015.4	2.40631	0.254367	9.45996	3.08e-21	2.94e-20	ttr-41
WBGene00017195	17139.9	2.40513	0.349361	6.88435	5.81e-12	2.9e-11	glo-4
WBGene00009057	4967.22	2.40509	0.24577	9.78596	1.29e-22	1.34e-21	cept-1
WBGene00001668	832.226	2.40425	0.232097	10.3588	3.82e-25	4.61e-24	gpa-6
WBGene00045501	7.31543	2.4042	0.899431	2.67303	0.00751701	0.0135992	Y6G8.8
WBGene00013744	12.5538	2.40362	0.87788	2.73798	0.00618169	0.0113605	Y111B2A.27
WBGene00008436	18713.9	2.40004	0.339052	7.07869	1.46e-12	7.63e-12	DH11.2
WBGene00044514	542.016	2.39939	0.411588	5.82959	5.56e-09	2.13e-08	R09E12.9
WBGene00004507	8853.6	2.39871	0.307997	7.78809	6.8e-15	4.28e-14	rpy-1
WBGene00004334	54.534	2.39869	0.618764	3.87658	0.000105936	0.000253633	ref-1
WBGene00206372	11.5912	2.39846	0.71992	3.33157	0.000863586	0.00182148	B0454.26
WBGene00007584	35.6474	2.39762	0.62487	3.83699	0.000124551	0.000295968	C14C10.1
WBGene00001863	19351.9	2.39714	0.562966	4.25805	2.06e-05	5.4e-05	him-4
WBGene00004462	13889.2	2.39672	0.161455	14.8445	7.55e-50	3.66e-48	rpn-6.1
WBGene00086561	30.1516	2.39273	0.476558	5.02086	5.14e-07	1.62e-06	K01A2.9
WBGene00008603	8651.33	2.39098	0.373712	6.39791	1.58e-10	6.92e-10	F09B9.4
WBGene00044358	21.0512	2.38886	0.837845	2.85119	0.00435554	0.00822117	Y71G12B.33
WBGene00015778	32501.3	2.38798	0.301401	7.92294	2.32e-15	1.51e-14	got-2.2
WBGene00015026	185.628	2.38709	0.255255	9.35176	8.62e-21	8.02e-20	B0207.1
WBGene00005642	538.159	2.3854	0.588934	4.05038	5.11e-05	0.000127513	srp-1
WBGene00002247	15470.2	2.38483	0.381951	6.2438	4.27e-10	1.8e-09	lam-1
WBGene00006319	1366.09	2.38009	0.474818	5.01264	5.37e-07	1.68e-06	sup-10
WBGene00022030	32.1975	2.37877	0.504389	4.71613	2.4e-06	7.04e-06	Y65B4A.7
WBGene00003567	93951.4	2.37851	0.252968	9.40244	5.33e-21	5.02e-20	ncx-2
WBGene00015619	12561.1	2.37538	0.236186	10.0572	8.54e-24	9.51e-23	C08G9.1
WBGene00004258	78919	2.3751	0.481018	4.93764	7.91e-07	2.44e-06	pyc-1
WBGene00016737	21.5773	2.37364	0.571214	4.15543	3.25e-05	8.29e-05	miro-2
WBGene00012042	197.264	2.37013	0.316841	7.4805	7.4e-14	4.31e-13	T26E3.10
WBGene00019407	5902.85	2.36906	0.287996	8.22599	1.94e-16	1.36e-15	lect-2
WBGene00004453	21614.2	2.36897	0.252669	9.37578	6.87e-21	6.42e-20	rpl-39
WBGene00020244	25.9293	2.36738	0.649995	3.64215	0.000270366	0.000612624	T05B4.13
WBGene00195073	1595.71	2.36704	0.216461	10.9352	7.82e-28	1.11e-26	F02E11.7
WBGene00011219	39.5075	2.36693	0.490107	4.82942	1.37e-06	4.12e-06	srxa-10
WBGene00018531	16.7728	2.36646	0.80275	2.94795	0.00319891	0.00616777	F47B3.7
WBGene00009058	14344.1	2.3662	0.386719	6.11866	9.44e-10	3.87e-09	F22E12.1
WBGene00020696	36080.7	2.36578	0.371846	6.36224	1.99e-10	8.64e-10	pygl-1
WBGene00022287	160.815	2.36488	0.39413	6.00025	1.97e-09	7.89e-09	Y75B7AR.1
WBGene00017186	324.511	2.36341	0.379398	6.22939	4.68e-10	1.97e-09	F07B7.2
WBGene00018711	72.5495	2.36313	0.586924	4.0263	5.67e-05	0.000140544	F52G3.3
WBGene00007950	3057.08	2.36292	0.189653	12.4592	1.25e-35	2.77e-34	C35A5.6
WBGene00017179	24.8517	2.36205	0.864314	2.73286	0.00627863	0.0115236	wht-4
WBGene00206516	52.5278	2.36105	0.885145	2.66742	0.00764365	0.013815	F53E4.2
WBGene00019770	5014.46	2.35999	0.590428	3.99709	6.41e-05	0.000158032	M04F3.4
WBGene00011702	123.854	2.35722	0.587271	4.01386	5.97e-05	0.000147759	srab-18
WBGene00007208	2108.17	2.35678	0.237749	9.91291	3.66e-23	3.93e-22	B0564.9
WBGene00044508	5197.47	2.35651	0.211647	11.1342	8.55e-29	1.29e-27	nsy-7
WBGene00007551	2002.39	2.3528	0.270082	8.71144	3e-18	2.41e-17	C13C4.7
WBGene00000942	40674.9	2.35215	0.348713	6.74522	1.53e-11	7.35e-11	deb-1
WBGene00004202	4870.47	2.35044	0.336716	6.98046	2.94e-12	1.5e-11	pry-1
WBGene00007273	24.5524	2.34982	0.742482	3.16482	0.00155178	0.00314886	C03C10.7
WBGene00019716	11454.9	2.34898	0.191356	12.2754	1.23e-34	2.61e-33	M01G5.3
WBGene00020007	26523.2	2.34661	0.365565	6.41913	1.37e-10	6.05e-10	R11F4.1
WBGene00008183	11342	2.34549	0.318545	7.36313	1.8e-13	1.01e-12	rin-1
WBGene00000428	181.771	2.3454	0.414202	5.66245	1.49e-08	5.5e-08	ceh-1
WBGene00020285	17.149	2.34483	0.748881	3.13111	0.00174145	0.00350437	T06A10.2
WBGene00016843	21.667	2.34414	0.753	3.11307	0.00185154	0.00371033	C50F7.3
WBGene00019843	995.187	2.34396	0.307946	7.61158	2.71e-14	1.63e-13	R03E9.2
WBGene00004460	15012.3	2.34289	0.207415	11.2957	1.38e-29	2.16e-28	rpn-3
WBGene00003930	17129.4	2.34289	0.238188	9.8363	7.85e-23	8.28e-22	pat-3
WBGene00021438	23.4477	2.34167	0.572703	4.08881	4.34e-05	0.000109102	Y39A3B.3
WBGene00011270	16744.1	2.34143	0.236911	9.88314	4.93e-23	5.27e-22	R31.2
WBGene00009308	22.1172	2.33873	0.638769	3.6613	0.000250939	0.000571399	F32A11.3
WBGene00007702	513.323	2.33715	0.23644	9.88475	4.85e-23	5.18e-22	C24H11.5
WBGene00016627	63.4664	2.33707	0.497503	4.69759	2.63e-06	7.68e-06	C44B7.5
WBGene00011789	90.6264	2.33662	0.685416	3.40905	0.000651893	0.00139815	T15H9.4
WBGene00015271	2389.68	2.33613	0.397869	5.87159	4.32e-09	1.68e-08	Y19D10A.4
WBGene00017303	14364.1	2.33584	0.525519	4.44483	8.8e-06	2.41e-05	F09F7.6
WBGene00006827	8853.77	2.33579	0.26573	8.79008	1.49e-18	1.22e-17	unc-98
WBGene00017170	31.1951	2.33566	0.678709	3.44133	0.000578856	0.00125272	F01G12.1
WBGene00013577	28784.3	2.33524	0.239992	9.73049	2.24e-22	2.29e-21	Y76A2B.5
WBGene00001864	1940.31	2.334	0.237448	9.82955	8.4e-23	8.84e-22	him-5
WBGene00003922	3746.59	2.3338	0.224926	10.3758	3.19e-25	3.88e-24	pas-1
WBGene00050885	501.419	2.33337	0.240428	9.7051	2.87e-22	2.92e-21	Y94H6A.12
WBGene00022336	208510	2.33336	0.24662	9.46138	3.04e-21	2.91e-20	Y82E9BR.3
WBGene00007353	3782.2	2.33241	0.303704	7.67989	1.59e-14	9.74e-14	C06A1.2
WBGene00012606	1423.04	2.33136	0.317253	7.34859	2e-13	1.12e-12	Y38F1A.2
WBGene00022491	2362.44	2.33097	0.213873	10.8988	1.17e-27	1.64e-26	Y119D3B.14
WBGene00006717	1233.81	2.32863	0.207812	11.2054	3.83e-29	5.87e-28	ubc-22
WBGene00012172	17.9995	2.32777	0.915519	2.54257	0.011004	0.0193359	W01B6.5
WBGene00018340	2451.61	2.32631	0.25031	9.29369	1.49e-20	1.37e-19	anmt-2
WBGene00017821	140.5	2.32377	0.250199	9.28766	1.58e-20	1.45e-19	F26D11.4
WBGene00016727	10.4771	2.32346	0.777276	2.98924	0.00279675	0.00543648	C46H11.1
WBGene00018519	202036	2.32189	0.21995	10.5564	4.74e-26	6.1e-25	F46H5.3
WBGene00001054	4631.05	2.32168	0.279371	8.3104	9.54e-17	6.87e-16	dpf-1
WBGene00021328	2209.65	2.32077	0.323086	7.18314	6.81e-13	3.67e-12	npr-23
WBGene00001248	3691.18	2.32037	0.182196	12.7356	3.75e-37	8.93e-36	elp-1
WBGene00010957	7562.28	2.32002	0.276901	8.37852	5.36e-17	3.93e-16	ND6
WBGene00009401	194.232	2.32	0.5552	4.17868	2.93e-05	7.53e-05	F35C11.2
WBGene00019326	17557.8	2.31628	0.221827	10.4419	1.6e-25	1.98e-24	K02F3.2
WBGene00013749	193.759	2.31296	0.283298	8.16441	3.23e-16	2.24e-15	Y113G7A.12
WBGene00004503	8001.75	2.31106	0.173325	13.3337	1.47e-40	4.23e-39	rpt-3
WBGene00000289	11006.6	2.31056	0.289234	7.98856	1.37e-15	9.1e-15	cam-1
WBGene00006978	9376.97	2.31036	0.163739	14.1101	3.29e-45	1.25e-43	zig-1
WBGene00005644	1617.03	2.30944	0.368204	6.27217	3.56e-10	1.51e-09	srp-3
WBGene00010738	2009.82	2.30939	0.245107	9.42196	4.43e-21	4.19e-20	K10D3.4
WBGene00017952	2460.85	2.30545	0.308761	7.46678	8.22e-14	4.76e-13	F31E3.6
WBGene00017041	1559	2.30447	0.226454	10.1763	2.53e-24	2.91e-23	D2007.1
WBGene00011003	1918.03	2.30329	0.391676	5.88061	4.09e-09	1.59e-08	R04B5.5
WBGene00007449	489.103	2.30298	0.233557	9.86046	6.18e-23	6.54e-22	C08F8.9
WBGene00010681	43318.3	2.2983	0.4034	5.69731	1.22e-08	4.52e-08	mak-1
WBGene00044233	826.092	2.29759	0.352799	6.51246	7.39e-11	3.35e-10	dolk-1
WBGene00003732	4160.94	2.29592	0.241626	9.50197	2.06e-21	2e-20	nhx-4
WBGene00003969	7236.59	2.28941	0.266201	8.6003	7.95e-18	6.2e-17	pef-1
WBGene00004209	503.037	2.28759	0.32423	7.05547	1.72e-12	8.98e-12	ptc-2
WBGene00006680	749.157	2.2874	0.397442	5.7553	8.65e-09	3.26e-08	twk-28
WBGene00000010	2187.43	2.28703	0.230938	9.90322	4.03e-23	4.32e-22	aat-9
WBGene00000612	91.2091	2.28559	0.414286	5.51694	3.45e-08	1.22e-07	col-35
WBGene00010579	28122.1	2.28483	0.234728	9.73393	2.16e-22	2.22e-21	K05C4.2
WBGene00020904	204.51	2.2842	0.231194	9.88002	5.08e-23	5.42e-22	T28F12.1
WBGene00019927	84.6132	2.28396	0.670568	3.406	0.000659214	0.00141305	fbxc-24
WBGene00018680	595.547	2.2819	0.25244	9.03939	1.58e-19	1.37e-18	tsen-54
WBGene00018240	675.173	2.2817	0.27245	8.37474	5.53e-17	4.05e-16	cox-17
WBGene00009161	15546.9	2.27864	0.267495	8.51842	1.62e-17	1.23e-16	cox-7C
WBGene00017925	13136	2.27861	0.231837	9.82853	8.49e-23	8.91e-22	F29B9.11
WBGene00011226	3520.17	2.27791	0.319541	7.1287	1.01e-12	5.37e-12	slc-25A21
WBGene00010409	1414.97	2.2774	0.290405	7.84215	4.43e-15	2.83e-14	H21P03.2
WBGene00018067	1129.56	2.27684	0.267362	8.51592	1.65e-17	1.26e-16	npr-7
WBGene00012657	336.009	2.27491	0.285557	7.96658	1.63e-15	1.08e-14	Y39A1A.20
WBGene00206366	389.009	2.27313	0.2541	8.94578	3.69e-19	3.11e-18	C03H5.9
WBGene00019001	47048.5	2.27284	0.219452	10.3569	3.89e-25	4.7e-24	ipgm-1
WBGene00011880	37136.9	2.27257	0.443889	5.11968	3.06e-07	9.82e-07	T21B6.3
WBGene00010912	13114	2.27031	0.16027	14.1656	1.5e-45	5.74e-44	gmps-1
WBGene00016679	276.961	2.269	0.424891	5.34019	9.28e-08	3.15e-07	C45G9.8
WBGene00018373	5919.83	2.26759	0.274981	8.24635	1.63e-16	1.15e-15	F43B10.1
WBGene00011409	11991	2.26758	0.210966	10.7486	6.02e-27	8.13e-26	T04A8.7
WBGene00020078	5.6141	2.26545	1.01567	2.23049	0.0257149	0.0420949	R52.6
WBGene00009044	29.6425	2.26475	0.753578	3.00533	0.00265294	0.0051776	F22B5.6
WBGene00003948	4627.53	2.26288	0.291076	7.7742	7.59e-15	4.76e-14	pbs-2
WBGene00015788	1662.78	2.26274	0.486597	4.65012	3.32e-06	9.54e-06	C15B12.8
WBGene00010179	1572.32	2.26255	0.229558	9.85614	6.45e-23	6.82e-22	F57A8.4
WBGene00021837	15.1845	2.26218	0.678991	3.33169	0.000863217	0.00182087	Y54E10BL.1
WBGene00010309	746.09	2.26015	0.272134	8.30526	9.96e-17	7.16e-16	rpn-6.2
WBGene00010442	197.542	2.25736	0.47235	4.77901	1.76e-06	5.24e-06	bus-12
WBGene00004401	1421.71	2.25704	0.254816	8.85751	8.18e-19	6.76e-18	rom-2
WBGene00009359	22.7495	2.25639	0.846724	2.66485	0.00770231	0.0139166	clec-102
WBGene00044979	50.23	2.25537	0.60016	3.75795	0.000171312	0.000399456	Y41E3.19
WBGene00020722	2192.31	2.25411	0.259637	8.68178	3.9e-18	3.1e-17	T23B12.8
WBGene00008979	7062.15	2.25105	0.197237	11.4129	3.6e-30	5.87e-29	slc-25A18.1
WBGene00000998	43055	2.2486	0.581419	3.86744	0.000109982	0.000262791	dig-1
WBGene00007352	14357.5	2.24788	0.160085	14.0419	8.64e-45	3.2e-43	cdc-48.1
WBGene00008925	13593.8	2.24696	0.304023	7.39075	1.46e-13	8.3e-13	F17H10.1
WBGene00018238	4908.32	2.24581	0.175634	12.7869	1.94e-37	4.72e-36	F40F4.7
WBGene00019646	8.90416	2.24553	0.881063	2.54866	0.0108136	0.0190252	K11D12.6
WBGene00077696	29.2637	2.24526	0.615069	3.65041	0.000261822	0.000594438	2021-03-01
WBGene00022380	17415.2	2.2418	0.24019	9.33342	1.03e-20	9.5e-20	Y94H6A.8
WBGene00021776	1939.05	2.24008	0.240901	9.29875	1.42e-20	1.31e-19	Y51H7BR.4
WBGene00017874	13015.6	2.2356	0.204114	10.9527	6.45e-28	9.2e-27	acdh-9
WBGene00014058	49132.3	2.23473	0.416517	5.36526	8.08e-08	2.76e-07	ZK673.2
WBGene00010030	31.0525	2.23393	0.700283	3.19004	0.00142255	0.00290442	F54B11.7
WBGene00007993	9831.35	2.23377	0.287276	7.77569	7.5e-15	4.71e-14	idhb-1
WBGene00003952	5871.43	2.23336	0.204811	10.9045	1.1e-27	1.55e-26	pbs-6
WBGene00019466	86796.6	2.23278	0.420409	5.31098	1.09e-07	3.66e-07	tos-1
WBGene00000518	8025.69	2.23088	0.221786	10.0587	8.41e-24	9.37e-23	ckk-1
WBGene00016509	134402	2.23055	0.249044	8.95647	3.35e-19	2.84e-18	adss-1
WBGene00004497	17452.6	2.22437	0.257673	8.6325	6e-18	4.72e-17	rps-28
WBGene00020802	43.3035	2.22386	0.657516	3.38221	0.000719043	0.00153298	btb-2
WBGene00013828	29.91	2.22311	0.645207	3.44558	0.000569843	0.001235	Y116F11B.13
WBGene00022062	433.777	2.22138	0.315045	7.05098	1.78e-12	9.25e-12	Y67D8B.2
WBGene00013805	3950.54	2.22116	0.31091	7.14406	9.06e-13	4.83e-12	bca-2
WBGene00006794	25151.6	2.22033	0.228343	9.72366	2.39e-22	2.45e-21	unc-60
WBGene00003048	19962.4	2.22009	0.240013	9.24985	2.25e-20	2.04e-19	lit-1
WBGene00022158	1067.91	2.21952	0.160518	13.8272	1.75e-43	6.01e-42	Y71G12B.23
WBGene00001824	4038.02	2.21867	0.363792	6.09873	1.07e-09	4.36e-09	hbl-1
WBGene00020146	25709.6	2.21863	0.211654	10.4823	1.04e-25	1.31e-24	got-1.2
WBGene00044243	22.8189	2.21776	0.800957	2.76889	0.00562479	0.0104076	F16C3.4
WBGene00001480	1970.92	2.21703	0.243123	9.11895	7.59e-20	6.72e-19	fmo-5
WBGene00001160	41133.9	2.21691	0.333721	6.64301	3.07e-11	1.44e-10	efk-1
WBGene00012225	402.287	2.21536	0.325183	6.81265	9.58e-12	4.7e-11	W03G11.3
WBGene00000380	90773.6	2.21387	0.267591	8.2733	1.3e-16	9.29e-16	cct-5
WBGene00020827	9086.1	2.21347	0.20969	10.5559	4.77e-26	6.13e-25	T26A8.4
WBGene00001340	9230.29	2.2134	0.171445	12.9103	3.94e-38	9.93e-37	etr-1
WBGene00007357	2055.24	2.21298	0.227565	9.72463	2.37e-22	2.42e-21	C06A12.3
WBGene00000636	33.9441	2.2126	0.59521	3.71735	0.000201327	0.000465539	col-60
WBGene00219283	215.109	2.21211	0.260705	8.48514	2.15e-17	1.63e-16	F55H12.7
WBGene00003547	613.073	2.2107	0.277488	7.96682	1.63e-15	1.08e-14	nas-29
WBGene00003102	1981.85	2.20913	0.24559	8.99522	2.36e-19	2.02e-18	mab-5
WBGene00021098	23.1088	2.20798	0.66148	3.33794	0.000844027	0.00178257	fbxb-14
WBGene00022123	197.385	2.20499	0.378101	5.83174	5.49e-09	2.11e-08	Y71F9AR.2
WBGene00021557	24.8115	2.20404	0.678195	3.24986	0.00115461	0.00238922	Y45G5AM.5
WBGene00021107	293.407	2.20283	0.382858	5.75363	8.73e-09	3.29e-08	F07B7.2
WBGene00000685	299.192	2.20199	0.393088	5.60176	2.12e-08	7.7e-08	col-111
WBGene00018491	52996.7	2.20144	0.261231	8.4272	3.54e-17	2.64e-16	mdh-1
WBGene00009664	48776.1	2.19908	0.207355	10.6054	2.81e-26	3.66e-25	idha-1
WBGene00011913	677.884	2.1989	0.235988	9.31786	1.19e-20	1.09e-19	glb-26
WBGene00021554	6123.54	2.19757	0.247471	8.88012	6.68e-19	5.56e-18	Y45G5AL.1
WBGene00185006	18.7974	2.19625	0.625351	3.51202	0.000444713	0.000978977	F59B2.15
WBGene00016913	10704.4	2.19416	0.470781	4.66067	3.15e-06	9.1e-06	lam-2
WBGene00007878	2446.6	2.19236	0.320407	6.8424	7.79e-12	3.84e-11	C33A11.2
WBGene00002991	8422.76	2.19172	0.320921	6.82946	8.52e-12	4.19e-11	lin-2
WBGene00001510	7586.91	2.19127	0.159425	13.7448	5.47e-43	1.81e-41	fzr-1
WBGene00019888	11901.1	2.19122	0.169879	12.8987	4.58e-38	1.15e-36	btbd-10
WBGene00007360	12.989	2.19076	0.907867	2.41309	0.0158181	0.0269784	C06B3.1
WBGene00022111	95.6074	2.18886	0.365912	5.98192	2.21e-09	8.78e-09	Y71F9AL.6
WBGene00006308	245.26	2.18735	0.395761	5.52695	3.26e-08	1.16e-07	sul-1
WBGene00012983	13428.6	2.18483	0.197649	11.0541	2.09e-28	3.09e-27	men-1
WBGene00009739	8364.31	2.18417	0.194173	11.2486	2.35e-29	3.65e-28	F45H10.2
WBGene00001879	120.103	2.18392	0.693445	3.14938	0.00163617	0.00330789	his-5
WBGene00004466	7878.68	2.18389	0.205068	10.6496	1.75e-26	2.3e-25	rpn-10
WBGene00010778	13132.7	2.18258	0.185048	11.7947	4.16e-32	7.63e-31	gpdh-2
WBGene00016033	5096.51	2.18182	0.401549	5.43351	5.53e-08	1.91e-07	C24A3.2
WBGene00016081	500.687	2.18097	0.431003	5.06023	4.19e-07	1.33e-06	C25A6.1
WBGene00006781	6570.58	2.18072	0.229549	9.50004	2.1e-21	2.03e-20	unc-45
WBGene00003929	15470.6	2.18058	0.421777	5.16998	2.34e-07	7.6e-07	pat-2
WBGene00000370	44098.6	2.17995	0.274892	7.93021	2.19e-15	1.43e-14	ccg-1
WBGene00009260	1866	2.17831	0.237352	9.17754	4.41e-20	3.95e-19	calm-1
WBGene00018392	2736.66	2.17715	0.281224	7.74168	9.81e-15	6.1e-14	insc-1
WBGene00206416	86.2564	2.17604	0.555166	3.91961	8.87e-05	0.000214582	W04H10.5
WBGene00044895	36.1687	2.17556	0.557203	3.90443	9.44e-05	0.000227802	R06A10.5
WBGene00008446	5343.78	2.1752	0.500278	4.34797	1.37e-05	3.67e-05	E01G4.3
WBGene00018204	2443.75	2.17496	0.200156	10.8663	1.67e-27	2.31e-26	F39F10.4
WBGene00016187	129.332	2.17452	0.296426	7.33579	2.2e-13	1.23e-12	C28G1.2
WBGene00021219	2127.81	2.174	0.408366	5.32367	1.02e-07	3.43e-07	Y19D10A.4
WBGene00009140	25065.7	2.17394	0.23577	9.2206	2.95e-20	2.67e-19	F26A3.1
WBGene00011526	3213.39	2.17369	0.233037	9.32767	1.08e-20	1e-19	cox-15
WBGene00007554	10025.3	2.17344	0.222438	9.77099	1.5e-22	1.55e-21	pptr-2
WBGene00020400	32.782	2.17305	0.57147	3.80256	0.000143206	0.000337449	T10B11.4
WBGene00019157	5757.29	2.17225	0.361421	6.01031	1.85e-09	7.43e-09	H05C05.1
WBGene00011000	14.3178	2.17214	0.73393	2.9596	0.00308036	0.005955	R03G8.6
WBGene00001096	246.734	2.17038	0.38143	5.69013	1.27e-08	4.7e-08	dsc-1
WBGene00021867	447.178	2.17033	0.276149	7.85929	3.86e-15	2.48e-14	Y54F10BM.13
WBGene00011302	4270.22	2.16922	0.21105	10.2782	8.83e-25	1.05e-23	R166.2
WBGene00006544	25.0177	2.16715	0.630605	3.43661	0.000589037	0.00127256	tbx-7
WBGene00017647	74.5248	2.16624	0.696288	3.11113	0.00186373	0.00373276	F20H11.4
WBGene00019018	13651.2	2.16603	0.30114	7.19275	6.35e-13	3.43e-12	abts-3
WBGene00020447	2858.66	2.16442	0.228772	9.46104	3.05e-21	2.92e-20	mob-3
WBGene00004506	6388.25	2.16426	0.197453	10.9609	5.89e-28	8.45e-27	rpt-6
WBGene00018562	1273.48	2.16355	0.301541	7.17499	7.23e-13	3.88e-12	F47D12.6
WBGene00022405	177.378	2.16316	0.542775	3.98538	6.74e-05	0.000165638	srsx-6
WBGene00008210	176.193	2.16301	0.378371	5.71665	1.09e-08	4.05e-08	C49F5.6
WBGene00009089	167.303	2.16007	0.338958	6.37267	1.86e-10	8.09e-10	jmjd-3.2
WBGene00021239	3879.55	2.15521	0.253467	8.50293	1.85e-17	1.4e-16	Y20F4.4
WBGene00003951	10968	2.15192	0.232705	9.24742	2.3e-20	2.09e-19	pbs-5
WBGene00022127	8933.99	2.15189	0.245369	8.77001	1.79e-18	1.45e-17	yop-1
WBGene00013969	21919.1	2.15153	0.264549	8.1328	4.19e-16	2.89e-15	tep-1
WBGene00003979	873.607	2.15149	0.257826	8.34473	7.14e-17	5.19e-16	pes-5
WBGene00017121	92977.6	2.15127	0.251201	8.56395	1.09e-17	8.39e-17	cyc-2.1
WBGene00044238	682.897	2.1501	0.211881	10.1477	3.39e-24	3.88e-23	C30H6.12
WBGene00001149	51422.4	2.14974	0.241823	8.88972	6.13e-19	5.1e-18	bcat-1
WBGene00004505	8230.1	2.14854	0.197678	10.8689	1.62e-27	2.25e-26	rpt-5
WBGene00044638	57.4954	2.14764	0.53197	4.03714	5.41e-05	0.000134563	F23A7.8
WBGene00018163	12.8976	2.14735	0.905837	2.37057	0.0177607	0.0299874	F38A5.6
WBGene00001726	55.1071	2.14713	0.641864	3.34514	0.000822412	0.00173893	grl-17
WBGene00009069	97.841	2.14663	0.31765	6.75782	1.4e-11	6.76e-11	F23A7.4
WBGene00044482	825.981	2.14563	0.255156	8.4091	4.13e-17	3.06e-16	F29B9.12
WBGene00009586	2242.36	2.14513	0.172205	12.4569	1.28e-35	2.85e-34	F40F9.10
WBGene00009706	170.26	2.14497	0.243698	8.80175	1.35e-18	1.1e-17	argk-1
WBGene00001854	11235.9	2.14402	0.199344	10.7553	5.59e-27	7.56e-26	hil-3
WBGene00011337	8364.3	2.14324	0.314651	6.8115	9.66e-12	4.74e-11	T01G1.2
WBGene00019613	7.89854	2.14319	0.966447	2.2176	0.026582	0.0433977	K10B4.1
WBGene00045488	285.976	2.14128	0.309202	6.92518	4.35e-12	2.19e-11	F57B1.9
WBGene00019170	6416.01	2.14063	0.222899	9.60358	7.72e-22	7.68e-21	H06I04.6
WBGene00000112	16426.4	2.13875	0.273721	7.81361	5.56e-15	3.52e-14	alh-6
WBGene00012354	45588.7	2.1375	0.248755	8.5928	8.49e-18	6.61e-17	cox-4
WBGene00009509	177.467	2.13714	0.284363	7.51552	5.67e-14	3.32e-13	F37D6.3
WBGene00012942	768.098	2.13648	0.598885	3.56744	0.000360489	0.000803863	Y47D3B.6
WBGene00006820	39194.2	2.13596	0.679613	3.14291	0.0016728	0.00337557	unc-89
WBGene00009404	868.977	2.13296	0.318288	6.70135	2.07e-11	9.83e-11	F35C11.5
WBGene00004271	22278.1	2.13246	0.242201	8.8045	1.31e-18	1.08e-17	rab-7
WBGene00022783	947.069	2.13245	0.274381	7.77188	7.73e-15	4.84e-14	tomm-7
WBGene00019061	37436.5	2.13205	0.248154	8.59164	8.57e-18	6.67e-17	F58F12.1
WBGene00015936	1513.28	2.13186	0.253125	8.42217	3.7e-17	2.75e-16	C17H12.11
WBGene00003082	1396.34	2.13157	0.216835	9.83038	8.33e-23	8.77e-22	lsm-8
WBGene00001671	2834.95	2.13111	0.186958	11.3989	4.24e-30	6.87e-29	gpa-9
WBGene00004502	7033.52	2.12876	0.209237	10.1739	2.59e-24	2.98e-23	rpt-2
WBGene00016630	156263	2.12831	0.692483	3.07344	0.00211604	0.00420111	acer-1
WBGene00009978	16090.9	2.12813	0.406992	5.22892	1.71e-07	5.62e-07	F53E4.1
WBGene00019768	436.266	2.12799	0.272169	7.81864	5.34e-15	3.39e-14	M04F3.2
WBGene00012560	854.547	2.12751	0.28727	7.40597	1.3e-13	7.43e-13	Y37D8A.25
WBGene00003153	43463.5	2.1266	0.330529	6.43393	1.24e-10	5.52e-10	mca-3
WBGene00010790	327186	2.12457	0.652203	3.25752	0.0011239	0.00233059	sodh-1
WBGene00021044	1246.58	2.12393	0.404213	5.25449	1.48e-07	4.92e-07	W05H7.1
WBGene00006729	1305.27	2.12371	0.280734	7.56486	3.88e-14	2.31e-13	ucp-4
WBGene00013542	1481.85	2.12274	0.255851	8.29675	1.07e-16	7.67e-16	lron-12
WBGene00206473	42.0351	2.1227	0.394828	5.37626	7.6e-08	2.6e-07	B0273.115
WBGene00000006	12419.3	2.12194	0.19463	10.9024	1.12e-27	1.58e-26	aat-5
WBGene00004954	709.242	2.1208	0.312538	6.78574	1.15e-11	5.62e-11	spd-3
WBGene00017864	35473.7	2.11783	0.204527	10.3547	3.98e-25	4.8e-24	pcca-1
WBGene00009439	6949.15	2.11742	0.433095	4.88903	1.01e-06	3.1e-06	mlcd-1
WBGene00001764	1054.78	2.11736	0.327455	6.46611	1.01e-10	4.5e-10	gst-16
WBGene00011777	83.4819	2.11722	0.363126	5.83054	5.52e-09	2.12e-08	T14G10.8
WBGene00022457	2119.34	2.11673	0.356576	5.93626	2.92e-09	1.15e-08	Y110A7A.7
WBGene00008332	1901.88	2.11418	0.252963	8.35768	6.4e-17	4.66e-16	C55A6.3
WBGene00000113	4765.21	2.11377	0.243285	8.68845	3.67e-18	2.93e-17	alh-7
WBGene00013701	545.708	2.11349	0.256603	8.23641	1.77e-16	1.25e-15	Y106G6D.4
WBGene00019611	3789.01	2.11083	0.34288	6.15618	7.45e-10	3.09e-09	K10B3.5
WBGene00015714	153.32	2.10931	0.485588	4.34382	1.4e-05	3.74e-05	C12D12.3
WBGene00020999	3825.22	2.10872	0.221551	9.51796	1.77e-21	1.72e-20	W03F9.1
WBGene00019650	1034.7	2.10847	0.202152	10.4301	1.81e-25	2.23e-24	K11D12.11
WBGene00017690	308.873	2.10813	0.264058	7.98359	1.42e-15	9.45e-15	ceh-60
WBGene00015611	2376.48	2.10763	0.313278	6.72766	1.72e-11	8.25e-11	C08F1.8
WBGene00015782	34.4082	2.10726	0.542539	3.88407	0.000102722	0.000246542	C14F11.7
WBGene00022165	352.201	2.10399	0.321204	6.55033	5.74e-11	2.62e-10	Y71H2AL.2
WBGene00015755	8611.08	2.10352	0.234775	8.95976	3.25e-19	2.76e-18	C14B9.10
WBGene00009812	10733.8	2.10166	0.292992	7.17308	7.33e-13	3.93e-12	suca-1
WBGene00016734	9945.78	2.10142	0.168232	12.4912	8.34e-36	1.87e-34	C46H11.10
WBGene00007206	1890.69	2.0995	0.220531	9.52019	1.73e-21	1.68e-20	B0564.9
WBGene00001748	94635.5	2.0954	0.225626	9.28707	1.59e-20	1.45e-19	gsp-2
WBGene00013408	15.7657	2.09532	0.723527	2.89598	0.00377971	0.00720431	fbxb-93
WBGene00017980	10099.7	2.09528	0.230385	9.09469	9.49e-20	8.34e-19	F32B5.7
WBGene00016406	5013.75	2.09502	0.370909	5.64833	1.62e-08	5.95e-08	C34D10.1
WBGene00004310	7542.61	2.0946	0.177404	11.807	3.59e-32	6.61e-31	ras-1
WBGene00011527	7321.09	2.09421	0.209543	9.99419	1.62e-23	1.78e-22	cchl-1
WBGene00010828	6709.74	2.09279	0.305774	6.84424	7.69e-12	3.8e-11	M02B1.3
WBGene00002214	1925.88	2.09211	0.322848	6.48016	9.16e-11	4.12e-10	klc-1
WBGene00007197	14115.3	2.09196	0.257579	8.12163	4.6e-16	3.16e-15	prdh-1
WBGene00003947	5193.95	2.09143	0.249613	8.3787	5.35e-17	3.93e-16	pbs-1
WBGene00003578	2889.37	2.09052	0.234812	8.90294	5.44e-19	4.55e-18	ndx-1
WBGene00021855	9533.12	2.08988	0.277238	7.5382	4.77e-14	2.81e-13	Y54F10AR.2
WBGene00019478	8246.23	2.08967	0.245784	8.50203	1.86e-17	1.41e-16	cri-2
WBGene00001875	15.2082	2.08933	0.904511	2.3099	0.0208936	0.0347918	his-18
WBGene00021055	939.08	2.08824	0.231505	9.02029	1.88e-19	1.62e-18	W06A11.4
WBGene00020490	4361.98	2.08657	0.329826	6.32627	2.51e-10	1.08e-09	tmc-1
WBGene00014214	2269.85	2.08651	0.224731	9.28449	1.62e-20	1.49e-19	ZK1073.2
WBGene00004112	9626.55	2.08649	0.386803	5.39418	6.88e-08	2.36e-07	pqn-22
WBGene00013732	9811.03	2.08349	0.272135	7.65609	1.92e-14	1.17e-13	aakg-1
WBGene00010665	29951.1	2.08203	0.223099	9.3323	1.04e-20	9.6e-20	K08E3.5
WBGene00004272	12064.4	2.08107	0.265073	7.85093	4.13e-15	2.64e-14	rab-8
WBGene00043998	246.693	2.07883	0.319036	6.51596	7.22e-11	3.28e-10	T21C12.8
WBGene00021640	1593.44	2.07822	0.243697	8.52789	1.49e-17	1.14e-16	Y47G6A.14
WBGene00001685	148297	2.07728	0.206278	10.0703	7.47e-24	8.34e-23	gpd-3
WBGene00021185	2348.48	2.07606	0.212719	9.75964	1.68e-22	1.73e-21	Y9C12A.1
WBGene00010423	59.4355	2.07563	0.478383	4.33884	1.43e-05	3.82e-05	zmp-5
WBGene00009666	6964.53	2.07252	0.454351	4.56149	5.08e-06	1.43e-05	slc-25A42
WBGene00019353	9903.88	2.07065	0.188575	10.9805	4.74e-28	6.86e-27	K03B4.1
WBGene00015152	216.273	2.06929	0.325853	6.3504	2.15e-10	9.3e-10	B0348.2
WBGene00001328	12178.4	2.06826	0.612276	3.37799	0.000730189	0.00155453	epi-1
WBGene00002266	21778.1	2.06629	0.26105	7.91529	2.47e-15	1.61e-14	lec-3
WBGene00014226	1480.83	2.06604	0.226583	9.11827	7.63e-20	6.76e-19	ZK1098.11
WBGene00019082	700.696	2.06547	0.218341	9.45981	3.08e-21	2.95e-20	pup-3
WBGene00004047	6295.65	2.06536	0.349665	5.90669	3.49e-09	1.36e-08	plx-1
WBGene00015185	10991	2.0652	0.253785	8.1376	4.03e-16	2.78e-15	mrpl-41
WBGene00021943	2775.86	2.06377	0.21642	9.53595	1.49e-21	1.45e-20	Y55F3BR.6
WBGene00011215	808.972	2.06331	0.236595	8.72086	2.76e-18	2.22e-17	R10E9.3
WBGene00013509	1627.01	2.06213	0.182235	11.3158	1.1e-29	1.73e-28	Y71A12B.12
WBGene00044049	9636.43	2.0616	0.152534	13.5156	1.26e-41	3.84e-40	sfxn-5
WBGene00045396	69.177	2.06113	0.41487	4.96814	6.76e-07	2.1e-06	ZC334.12
WBGene00008604	1242.91	2.05976	0.209847	9.81555	9.65e-23	1.01e-21	F09B9.5
WBGene00004443	16440.9	2.05946	0.264522	7.78558	6.94e-15	4.37e-14	rpl-29
WBGene00021260	4429.54	2.0592	0.238638	8.62894	6.19e-18	4.87e-17	Y22D7AR.6
WBGene00004282	1318.88	2.05874	0.263337	7.81789	5.37e-15	3.41e-14	rab-30
WBGene00008426	1620.51	2.05831	0.232258	8.86218	7.85e-19	6.5e-18	D2045.9
WBGene00020030	5221.97	2.05796	0.330182	6.23281	4.58e-10	1.93e-09	kel-20
WBGene00007122	11310.3	2.05784	0.256333	8.02799	9.91e-16	6.66e-15	B0250.5
WBGene00012323	167.527	2.0558	0.816316	2.51838	0.0117895	0.0206004	oac-54
WBGene00000177	3023.87	2.0551	0.287384	7.15104	8.61e-13	4.6e-12	aqp-9
WBGene00012259	3767.47	2.05508	0.233182	8.81321	1.22e-18	9.98e-18	sulp-7
WBGene00004504	9794.9	2.05293	0.168683	12.1703	4.47e-34	9.16e-33	rpt-4
WBGene00013924	7047.52	2.05046	0.268048	7.64961	2.02e-14	1.23e-13	rad-23
WBGene00009952	11173.3	2.04908	0.21339	9.60252	7.8e-22	7.76e-21	acaa-2
WBGene00017288	2263.4	2.04855	0.238121	8.60298	7.77e-18	6.07e-17	F09E5.10
WBGene00009668	1757.94	2.04815	0.390185	5.24918	1.53e-07	5.06e-07	cfim-1
WBGene00021358	36.3378	2.04667	0.436286	4.69113	2.72e-06	7.91e-06	Y37E11AL.2
WBGene00008851	985.589	2.04483	0.488804	4.18333	2.87e-05	7.39e-05	F15B9.8
WBGene00009793	9314.36	2.0445	0.301057	6.79108	1.11e-11	5.43e-11	pkn-1
WBGene00016739	18627.6	2.04426	0.295851	6.90976	4.85e-12	2.44e-11	pitr-1
WBGene00001745	3385.83	2.04399	0.325424	6.28101	3.36e-10	1.43e-09	gsa-1
WBGene00008623	25.1306	2.04262	0.768676	2.65732	0.0078764	0.0142083	spe-43
WBGene00007664	4473.91	2.04243	0.262897	7.76894	7.91e-15	4.95e-14	seb-3
WBGene00021546	2457.29	2.04178	0.234414	8.71013	3.04e-18	2.43e-17	laat-1
WBGene00001987	1277.39	2.04067	0.250843	8.13523	4.11e-16	2.83e-15	hot-2
WBGene00012347	4308.55	2.04021	0.276961	7.36641	1.75e-13	9.89e-13	W08G11.3
WBGene00016249	3852.87	2.03656	0.207105	9.83343	8.08e-23	8.51e-22	mrpl-32
WBGene00007855	3616.34	2.0357	0.190306	10.697	1.05e-26	1.4e-25	C31H5.4
WBGene00009332	198.875	2.03539	0.323495	6.29186	3.14e-10	1.34e-09	F32D8.8
WBGene00007616	1324.22	2.03468	0.283585	7.17486	7.24e-13	3.89e-12	rpoa-12
WBGene00006875	4252.59	2.03305	0.233935	8.69066	3.6e-18	2.87e-17	vab-9
WBGene00006962	17.8627	2.03287	0.638353	3.18455	0.00144977	0.00295572	xol-1
WBGene00017663	17325.4	2.03233	0.184933	10.9896	4.29e-28	6.22e-27	F21D12.3
WBGene00013222	3886.77	2.03218	0.242675	8.37409	5.57e-17	4.08e-16	dmsr-6
WBGene00019923	42.7375	2.03071	0.518879	3.91366	9.09e-05	0.000219781	fbxc-29
WBGene00022608	3451.42	2.0282	0.380879	5.32505	1.01e-07	3.41e-07	madf-9
WBGene00019255	115.983	2.02616	0.312532	6.48305	8.99e-11	4.04e-10	H32C10.1
WBGene00009632	11588.5	2.0255	0.208968	9.69285	3.23e-22	3.28e-21	ttyh-1
WBGene00005138	35.1458	2.02463	0.547967	3.69481	0.000220054	0.000505675	srd-61
WBGene00008310	1053.03	2.02431	0.24785	8.16745	3.15e-16	2.19e-15	C54E10.6
WBGene00004360	2763.06	2.02337	0.227506	8.89367	5.91e-19	4.93e-18	rib-1
WBGene00012984	653.889	2.02173	0.227747	8.87709	6.86e-19	5.7e-18	Y48B6A.13
WBGene00015300	240.982	2.01963	0.275662	7.32647	2.36e-13	1.32e-12	C01F1.5
WBGene00017923	3819.91	2.01947	0.249524	8.09331	5.81e-16	3.96e-15	F29B9.8
WBGene00008424	826.692	2.01947	0.242275	8.33545	7.72e-17	5.6e-16	D2045.7
WBGene00010045	7798.68	2.01887	0.323141	6.24764	4.17e-10	1.76e-09	F54C9.11
WBGene00022101	178.167	2.01799	0.353778	5.70411	1.17e-08	4.35e-08	Y69A2AR.32
WBGene00003600	9310.7	2.01701	0.246459	8.18396	2.75e-16	1.91e-15	nhr-1
WBGene00010823	8.29617	2.01598	0.865958	2.32804	0.0199101	0.0333067	M01G12.10
WBGene00013700	194.999	2.01562	0.293758	6.86148	6.82e-12	3.38e-11	Y106G6D.3
WBGene00022569	3862.94	2.0147	0.272639	7.38965	1.47e-13	8.37e-13	ZC239.6
WBGene00022242	2799.58	2.01342	0.309244	6.5108	7.48e-11	3.38e-10	sfrp-1
WBGene00017887	4967.05	2.01319	0.166068	12.1227	8.01e-34	1.61e-32	F28B3.6
WBGene00002023	9427.42	2.0129	0.30547	6.58952	4.41e-11	2.04e-10	hsp-25
WBGene00007668	2039.82	2.01255	0.20841	9.65668	4.61e-22	4.64e-21	C18B12.6
WBGene00008921	916.856	2.0122	0.241122	8.34516	7.11e-17	5.17e-16	ctf-4
WBGene00000996	3085.43	2.0119	0.408542	4.92458	8.45e-07	2.6e-06	dif-1
WBGene00013265	1309.45	2.0087	0.214089	9.38256	6.44e-21	6.03e-20	parn-2
WBGene00004463	7147.09	2.00689	0.209539	9.57765	9.93e-22	9.82e-21	rpn-7
WBGene00013366	1526.46	2.00669	0.301804	6.64899	2.95e-11	1.38e-10	Y60A3A.21
WBGene00003225	9450.31	2.00569	0.28062	7.14735	8.85e-13	4.72e-12	mev-1
WBGene00044690	193.944	2.00307	0.282502	7.09045	1.34e-12	7.03e-12	M02B7.7
WBGene00007492	12487.6	2.00234	0.208285	9.61344	7.02e-22	6.99e-21	C09G9.1
WBGene00044774	2085.59	2.00099	0.245631	8.14633	3.75e-16	2.59e-15	F16B3.3
WBGene00019002	741.191	1.99983	0.375782	5.32178	1.03e-07	3.46e-07	F57B10.4
WBGene00012988	4709.13	1.99934	0.229338	8.71787	2.83e-18	2.28e-17	ztf-22
WBGene00007597	252.659	1.99869	0.342908	5.82865	5.59e-09	2.15e-08	C15A11.2
WBGene00000210	21982.4	1.9973	0.190313	10.4948	9.13e-26	1.15e-24	asg-2
WBGene00019259	7458.98	1.99712	0.201145	9.92876	3.12e-23	3.37e-22	H34C03.2
WBGene00013696	30.4104	1.99692	0.544826	3.66523	0.000247112	0.000563312	Y106G6A.4
WBGene00010857	435.291	1.99469	0.194438	10.2588	1.08e-24	1.27e-23	M04C9.2
WBGene00219209	21.8385	1.9944	0.545453	3.65641	0.000255768	0.00058169	F29F11.20
WBGene00006852	8986.02	1.99034	0.269879	7.37494	1.64e-13	9.3e-13	unc-129
WBGene00022059	6079.01	1.99024	0.292125	6.81298	9.56e-12	4.69e-11	Y67D8A.2
WBGene00022832	2393.26	1.989	0.237288	8.38219	5.2e-17	3.82e-16	pdp-1
WBGene00001980	9686.35	1.98826	0.353654	5.62203	1.89e-08	6.88e-08	hmr-1
WBGene00020114	22570.5	1.98765	0.263851	7.53323	4.95e-14	2.92e-13	pde-4
WBGene00003100	28.1325	1.98726	0.510458	3.89309	9.9e-05	0.00023816	mab-3
WBGene00015673	2080.98	1.98614	0.230539	8.61517	6.98e-18	5.47e-17	C10E2.2
WBGene00014002	3314.49	1.98398	0.249228	7.96048	1.71e-15	1.13e-14	ZK593.2
WBGene00023458	170.099	1.98385	0.332388	5.96848	2.39e-09	9.5e-09	M02E1.3
WBGene00016869	148.75	1.98287	0.36788	5.38999	7.05e-08	2.42e-07	C52B9.10
WBGene00007317	4250.85	1.98162	0.251725	7.87215	3.49e-15	2.24e-14	C05A9.2
WBGene00003843	1396.92	1.9812	0.324349	6.10823	1.01e-09	4.12e-09	2021-10-02
WBGene00010838	8227.43	1.97989	0.231306	8.55961	1.13e-17	8.7e-17	M03C11.1
WBGene00016115	11164	1.97978	0.193064	10.2545	1.13e-24	1.33e-23	mdt-26
WBGene00011640	60.4875	1.97833	0.839408	2.35681	0.0184327	0.0310312	T09A5.14
WBGene00014157	31.1105	1.97714	0.669738	2.95212	0.00315603	0.0060903	ZK930.7
WBGene00255597	16.8772	1.9737	0.746937	2.64239	0.00823228	0.0147875	pals-21
WBGene00009126	35995.7	1.97369	0.234283	8.4244	3.63e-17	2.69e-16	pyk-1
WBGene00016198	61.1281	1.97111	0.515078	3.82682	0.00012981	0.00030762	C28H8.7
WBGene00044584	293.891	1.9709	0.458997	4.29392	1.76e-05	4.64e-05	T03G11.9
WBGene00001691	16.805	1.96942	0.774604	2.54248	0.0110068	0.0193379	grd-2
WBGene00017819	302.641	1.96827	0.465646	4.22697	2.37e-05	6.16e-05	F26D11.2
WBGene00019284	10412.4	1.96432	0.313079	6.27422	3.51e-10	1.49e-09	K01A2.10
WBGene00011221	3454.96	1.96388	0.309264	6.35019	2.15e-10	9.31e-10	R10E12.2
WBGene00006695	273.947	1.96279	0.331896	5.91388	3.34e-09	1.31e-08	twk-45
WBGene00019525	1078.51	1.9623	0.467717	4.1955	2.72e-05	7.03e-05	K08D9.4
WBGene00009800	3410.73	1.96205	0.20945	9.36764	7.42e-21	6.93e-20	rrc-1
WBGene00000961	4092.04	1.96106	0.363538	5.39438	6.88e-08	2.36e-07	dgn-1
WBGene00010082	260.577	1.96035	0.393236	4.98516	6.19e-07	1.93e-06	F55A11.11
WBGene00009532	42774.4	1.95863	0.253952	7.71258	1.23e-14	7.61e-14	ccch-1
WBGene00002213	3385.89	1.95851	0.290545	6.74081	1.58e-11	7.57e-11	kin-32
WBGene00002162	66266.5	1.95753	0.219879	8.90278	5.45e-19	4.55e-18	isp-1
WBGene00002013	2980.86	1.95745	0.777994	2.51602	0.0118687	0.0207261	hsp-12.6
WBGene00016716	27474.6	1.95638	0.262687	7.44755	9.51e-14	5.48e-13	acs-17
WBGene00077520	285.581	1.95635	0.238806	8.19219	2.57e-16	1.79e-15	C37A5.11
WBGene00002179	19443.3	1.95591	0.274525	7.12472	1.04e-12	5.53e-12	jph-1
WBGene00015184	3266.86	1.95185	0.179645	10.865	1.69e-27	2.34e-26	djr-1.1
WBGene00044413	146.643	1.95007	0.254956	7.64865	2.03e-14	1.23e-13	B0205.12
WBGene00010364	1148.8	1.94989	0.179074	10.8887	1.3e-27	1.83e-26	H04D03.3
WBGene00017314	3275.03	1.94809	0.249064	7.82165	5.21e-15	3.31e-14	lgc-39
WBGene00009454	29099.1	1.9472	0.230817	8.43614	3.28e-17	2.45e-16	F36A2.7
WBGene00000417	440.383	1.94687	0.423685	4.5951	4.33e-06	1.23e-05	ced-3
WBGene00003182	12501.3	1.9459	0.220345	8.83114	1.04e-18	8.53e-18	mef-2
WBGene00020220	16.3417	1.94578	0.630025	3.08842	0.00201224	0.00400917	clec-140
WBGene00013004	6573.08	1.9448	0.221908	8.764	1.88e-18	1.53e-17	mrpl-37
WBGene00008885	1720.87	1.94399	0.29726	6.5397	6.16e-11	2.81e-10	F16C3.1
WBGene00019007	3360.53	1.94361	0.220478	8.81541	1.19e-18	9.79e-18	ucr-11
WBGene00000294	9018.32	1.94218	0.224883	8.63641	5.8e-18	4.57e-17	cas-1
WBGene00002191	48330.5	1.94217	0.19882	9.76853	1.54e-22	1.59e-21	kin-3
WBGene00019612	12348.6	1.94122	0.266387	7.28723	3.16e-13	1.75e-12	gpcp-1
WBGene00004461	5278.43	1.94113	0.178173	10.8946	1.22e-27	1.72e-26	rpn-5
WBGene00001116	5632.69	1.94089	0.376595	5.15379	2.55e-07	8.25e-07	dyc-1
WBGene00044082	3292.69	1.94066	0.208878	9.29088	1.53e-20	1.4e-19	D1086.12
WBGene00001434	314.542	1.94018	0.494027	3.92728	8.59e-05	0.000208172	fkh-2
WBGene00021047	5019.94	1.93884	0.253945	7.63488	2.26e-14	1.37e-13	zfp-3
WBGene00003565	2348.83	1.93864	0.292056	6.63791	3.18e-11	1.49e-10	ncs-3
WBGene00020664	34.8198	1.93734	0.676109	2.86542	0.00416453	0.00789106	T21H3.5
WBGene00019448	1057.46	1.93606	0.315885	6.12899	8.84e-10	3.64e-09	frpr-13
WBGene00016119	16968.4	1.93451	0.398508	4.85438	1.21e-06	3.66e-06	C25H3.10
WBGene00000554	16162.9	1.93068	0.218272	8.84529	9.13e-19	7.54e-18	cnb-1
WBGene00017298	5950.53	1.92991	0.296301	6.51334	7.35e-11	3.33e-10	toca-1
WBGene00000035	3549.02	1.9298	0.289972	6.65513	2.83e-11	1.33e-10	ace-1
WBGene00017733	2081.22	1.92975	0.278913	6.91882	4.55e-12	2.29e-11	ubxn-1
WBGene00015337	66.923	1.92846	0.329052	5.86066	4.61e-09	1.78e-08	gsto-2
WBGene00005748	37.3684	1.92667	0.680188	2.83255	0.00461778	0.00867687	srw-1
WBGene00000229	170100	1.92598	0.234833	8.20149	2.37e-16	1.66e-15	atp-2
WBGene00077508	16.682	1.92536	0.763589	2.52146	0.0116869	0.0204435	T27F6.10
WBGene00009769	3001.98	1.92473	0.214513	8.97258	2.9e-19	2.46e-18	F46B6.4
WBGene00022653	50.809	1.9234	0.624236	3.08121	0.00206159	0.00410096	ZK105.1
WBGene00015124	995.165	1.92325	0.305688	6.29154	3.14e-10	1.34e-09	anmt-1
WBGene00015094	30.9686	1.92025	0.47872	4.0112	6.04e-05	0.000149367	B0261.6
WBGene00012654	22.7877	1.91846	0.595319	3.22257	0.00127044	0.00261306	Y39A1A.16
WBGene00021641	187.812	1.9182	0.474116	4.04584	5.21e-05	0.000129847	Y47G6A.15
WBGene00022856	34147.4	1.91584	0.313555	6.11007	9.96e-10	4.08e-09	cth-2
WBGene00045210	83.4738	1.91522	0.339667	5.63853	1.72e-08	6.28e-08	C54D2.6
WBGene00013773	29.2596	1.91341	0.565319	3.38465	0.000712695	0.00152088	Y116A8A.2
WBGene00022379	959.781	1.91301	0.316637	6.04165	1.53e-09	6.16e-09	Y94H6A.7
WBGene00011918	7.32947	1.91294	0.884192	2.16349	0.0305033	0.049218	T22C1.8
WBGene00015352	2236.66	1.91289	0.175969	10.8706	1.59e-27	2.21e-26	C02F5.12
WBGene00004496	35037	1.91186	0.272205	7.02359	2.16e-12	1.12e-11	rps-27
WBGene00019301	19923.5	1.91084	0.184859	10.3368	4.81e-25	5.77e-24	K02D10.1
WBGene00009125	193.702	1.91049	0.407771	4.6852	2.8e-06	8.13e-06	F25H5.2
WBGene00002030	1013.22	1.90748	0.209618	9.09977	9.05e-20	7.97e-19	hst-3.1
WBGene00001831	666.782	1.9071	0.268916	7.09181	1.32e-12	6.96e-12	hcp-3
WBGene00008422	5552.47	1.90627	0.385087	4.95023	7.41e-07	2.29e-06	D2045.2
WBGene00011904	9473.32	1.90595	0.345945	5.50941	3.6e-08	1.27e-07	hlb-1
WBGene00014074	3335.04	1.90479	0.248835	7.65485	1.94e-14	1.18e-13	ZK757.2
WBGene00000225	6665.66	1.90457	0.313406	6.07699	1.22e-09	4.97e-09	atgp-2
WBGene00004490	24312.6	1.90333	0.298149	6.38382	1.73e-10	7.56e-10	rps-21
WBGene00012915	477.549	1.90264	0.310725	6.12325	9.17e-10	3.77e-09	lgc-35
WBGene00022492	5304.47	1.90209	0.205736	9.24527	2.35e-20	2.13e-19	dss-1
WBGene00001986	2446.29	1.9013	0.276493	6.87648	6.13e-12	3.06e-11	hot-1
WBGene00010783	954.297	1.90121	0.223882	8.492	2.03e-17	1.54e-16	mrpl-36
WBGene00002263	21492	1.90039	0.320911	5.92185	3.18e-09	1.25e-08	lea-1
WBGene00016235	6284.48	1.89992	0.246689	7.7017	1.34e-14	8.27e-14	C29H12.2
WBGene00045473	18.8937	1.8993	0.661501	2.8712	0.00408921	0.00775879	F30A10.14
WBGene00006391	1391.88	1.89901	0.245239	7.74349	9.67e-15	6.02e-14	taf-9
WBGene00020219	2468.79	1.89871	0.43089	4.40649	1.05e-05	2.85e-05	T05A7.1
WBGene00019760	6752.27	1.89744	0.281002	6.75239	1.45e-11	7.01e-11	calu-1
WBGene00013576	625.547	1.89684	0.291676	6.50326	7.86e-11	3.55e-10	Y76A2B.4
WBGene00016269	8505.5	1.8964	0.383435	4.94582	7.58e-07	2.34e-06	C30G4.4
WBGene00009503	18592.9	1.89618	0.37284	5.08578	3.66e-07	1.17e-06	F37A8.5
WBGene00003953	6108.97	1.89479	0.233671	8.10881	5.11e-16	3.5e-15	pbs-7
WBGene00017750	244.34	1.89253	0.277354	6.82352	8.88e-12	4.37e-11	F23F1.10
WBGene00006164	14.69	1.89112	0.667914	2.83138	0.00463474	0.00870148	str-113
WBGene00003926	6204.31	1.89089	0.277417	6.81605	9.36e-12	4.59e-11	pas-5
WBGene00008719	62.2284	1.88931	0.724005	2.60952	0.00906681	0.0161666	ttr-52
WBGene00000509	9588.74	1.88798	0.240466	7.85133	4.12e-15	2.64e-14	cka-1
WBGene00021564	2019.88	1.88703	0.20786	9.07835	1.1e-19	9.64e-19	Y45G12B.3
WBGene00010711	210.882	1.88701	0.317626	5.941	2.83e-09	1.12e-08	K09B11.4
WBGene00000207	58554.8	1.88598	0.220153	8.5667	1.06e-17	8.21e-17	asb-2
WBGene00001403	9249.95	1.88409	0.200848	9.38067	6.56e-21	6.13e-20	fbl-1
WBGene00009585	43.9207	1.88403	0.617302	3.05203	0.00227298	0.00449052	cal-7
WBGene00016441	19.3686	1.8838	0.821776	2.29236	0.021885	0.036319	C35D10.3
WBGene00009614	305.791	1.88368	0.253941	7.41777	1.19e-13	6.82e-13	F41D3.9
WBGene00006478	4780.1	1.88145	0.183576	10.2489	1.2e-24	1.41e-23	tag-131
WBGene00017906	90.4011	1.88111	0.378273	4.9729	6.6e-07	2.05e-06	F28F9.2
WBGene00003038	1352.99	1.8807	0.344966	5.45184	4.99e-08	1.73e-07	lin-56
WBGene00008267	123.008	1.87981	0.386546	4.86308	1.16e-06	3.51e-06	C53A5.9
WBGene00018311	1796.24	1.87974	0.219165	8.57682	9.75e-18	7.55e-17	F41G4.8
WBGene00007332	230.098	1.87931	0.721001	2.60652	0.00914662	0.0163012	C05C10.5
WBGene00007901	522.29	1.87922	0.352523	5.33076	9.78e-08	3.31e-07	C33D9.8
WBGene00022347	4548.5	1.87873	0.23446	8.01302	1.12e-15	7.49e-15	Y82E9BR.14
WBGene00008364	3179.19	1.87868	0.255938	7.34039	2.13e-13	1.19e-12	slc-25A26
WBGene00044021	841.52	1.87734	0.341108	5.50366	3.72e-08	1.31e-07	R02E4.2
WBGene00020994	6017.63	1.8766	0.232968	8.05518	7.94e-16	5.38e-15	W03F8.4
WBGene00011859	5901.31	1.87657	0.246028	7.62748	2.39e-14	1.45e-13	T20D3.6
WBGene00013671	1275.6	1.87654	0.184409	10.1759	2.54e-24	2.93e-23	Y105E8A.11
WBGene00010991	72.8428	1.87635	0.493878	3.79922	0.000145153	0.000341823	R03D7.5
WBGene00001953	186.771	1.87368	0.351013	5.33793	9.4e-08	3.19e-07	hlh-8
WBGene00013860	3014.79	1.8733	0.402611	4.65289	3.27e-06	9.43e-06	ZC247.2
WBGene00018532	11691	1.87299	0.238814	7.84289	4.4e-15	2.81e-14	F47B7.1
WBGene00006272	53.574	1.87147	0.568524	3.29179	0.000995503	0.00208063	str-245
WBGene00021388	1105.37	1.87118	0.192637	9.71346	2.64e-22	2.69e-21	Y37F4.7
WBGene00006844	3412.55	1.87001	0.199945	9.35263	8.55e-21	7.96e-20	unc-120
WBGene00021763	502.138	1.86949	0.399189	4.68321	2.82e-06	8.2e-06	Y51F10.2
WBGene00086553	146.38	1.86816	0.448061	4.16943	3.05e-05	7.82e-05	ZC334.13
WBGene00004145	17112	1.8675	0.678956	2.75054	0.00594965	0.0109609	pqn-62
WBGene00010878	2116.71	1.86745	0.249735	7.47775	7.56e-14	4.39e-13	M05D6.5
WBGene00004925	3441.85	1.86487	0.289269	6.44684	1.14e-10	5.08e-10	snt-5
WBGene00006832	1925.95	1.86398	0.371659	5.01529	5.3e-07	1.66e-06	unc-105
WBGene00004108	10320.7	1.86365	0.294053	6.3378	2.33e-10	1.01e-09	pqn-18
WBGene00017659	48055.5	1.8629	0.716312	2.60069	0.00930369	0.0165602	F21C10.10
WBGene00004783	8829.44	1.86285	0.206669	9.01367	1.99e-19	1.72e-18	seu-1
WBGene00015803	13531.9	1.86247	0.257141	7.24301	4.39e-13	2.4e-12	C15H9.9
WBGene00007366	990.982	1.86216	0.478086	3.89504	9.82e-05	0.00023633	C06B3.7
WBGene00015025	9420.23	1.86195	0.186089	10.0057	1.44e-23	1.59e-22	mrpl-9
WBGene00010882	6029.74	1.86181	0.207557	8.97011	2.96e-19	2.52e-18	atg-7
WBGene00007711	3133.61	1.86157	0.214283	8.68744	3.71e-18	2.95e-17	lid-1
WBGene00009476	11365.4	1.85965	0.23887	7.7852	6.96e-15	4.38e-14	F36F2.2
WBGene00022493	1978.36	1.85895	0.285368	6.51423	7.31e-11	3.31e-10	mrpl-45
WBGene00021352	8541.37	1.85807	0.216363	8.58775	8.87e-18	6.89e-17	pcyt-2.1
WBGene00002997	1720.39	1.85743	0.217125	8.55465	1.18e-17	9.07e-17	lin-8
WBGene00011902	31.7166	1.85743	0.565618	3.28389	0.00102385	0.00213571	T21E8.4
WBGene00022381	2260.24	1.85661	0.246838	7.52159	5.41e-14	3.18e-13	ubxn-2
WBGene00018586	9346.51	1.85451	0.196673	9.42942	4.12e-21	3.92e-20	ubxn-3
WBGene00015074	10704.9	1.85399	0.554165	3.34556	0.000821172	0.00173658	natc-2
WBGene00006836	11981.6	1.85389	0.250374	7.40449	1.32e-13	7.51e-13	unc-112
WBGene00255595	106.318	1.85349	0.364676	5.08257	3.72e-07	1.18e-06	D1046.18
WBGene00016343	2276.79	1.85345	0.306069	6.05567	1.4e-09	5.66e-09	cnnm-3
WBGene00006805	23443.7	1.85229	0.272224	6.80429	1.02e-11	4.97e-11	unc-73
WBGene00009657	715.523	1.85057	0.335639	5.51356	3.52e-08	1.24e-07	F43G6.4
WBGene00008039	352.803	1.85026	0.31134	5.9429	2.8e-09	1.1e-08	C40H1.3
WBGene00044152	23.1334	1.85009	0.649004	2.85066	0.00436292	0.00823441	W04G3.10
WBGene00010074	863.631	1.84979	0.220693	8.38173	5.22e-17	3.83e-16	irld-34
WBGene00001670	1326.87	1.84977	0.32343	5.71923	1.07e-08	3.99e-08	gpa-8
WBGene00003677	4211.45	1.8495	0.193535	9.5564	1.22e-21	1.2e-20	nhr-87
WBGene00008929	366.436	1.84534	0.384153	4.80366	1.56e-06	4.66e-06	F18A11.2
WBGene00004459	11848	1.84525	0.216378	8.5279	1.49e-17	1.14e-16	rpn-2
WBGene00008505	160798	1.8432	0.217911	8.45852	2.71e-17	2.03e-16	F01G4.6
WBGene00008415	11037.2	1.84258	0.253342	7.27308	3.51e-13	1.94e-12	mce-1
WBGene00013477	2549.75	1.8412	0.384697	4.7861	1.7e-06	5.06e-06	Y69E1A.5
WBGene00016197	15774.7	1.84111	0.252347	7.29597	2.97e-13	1.64e-12	pxl-1
WBGene00019205	23104	1.83856	0.325518	5.64811	1.62e-08	5.95e-08	kcc-2
WBGene00022427	10708.6	1.83744	0.214911	8.54976	1.23e-17	9.45e-17	spl-3
WBGene00013308	6685.47	1.83675	0.307605	5.97114	2.36e-09	9.36e-09	Y57G11C.1147
WBGene00004468	3458.59	1.83669	0.259619	7.07457	1.5e-12	7.84e-12	rpn-12
WBGene00017711	791.825	1.8365	0.363776	5.04844	4.45e-07	1.41e-06	F22E5.13
WBGene00020530	8510.6	1.83615	0.272987	6.72614	1.74e-11	8.33e-11	T15B12.1
WBGene00006673	72.6853	1.83536	0.391145	4.69228	2.7e-06	7.87e-06	twk-20
WBGene00000951	2406.06	1.83515	0.205967	8.90995	5.11e-19	4.27e-18	deg-3
WBGene00008134	1150.1	1.83485	0.230446	7.96214	1.69e-15	1.12e-14	C47B2.9
WBGene00000188	1887.04	1.83474	0.443398	4.1379	3.51e-05	8.92e-05	arl-3
WBGene00020025	3645.87	1.83366	0.161761	11.3356	8.74e-30	1.39e-28	R12C12.5
WBGene00013531	567.003	1.83304	0.247638	7.40207	1.34e-13	7.65e-13	Y73F8A.26
WBGene00006786	15693.8	1.83243	0.280224	6.53916	6.19e-11	2.82e-10	unc-51
WBGene00020068	3603.4	1.83059	0.319921	5.72201	1.05e-08	3.93e-08	cra-1
WBGene00006603	23516.6	1.82976	0.450349	4.06299	4.84e-05	0.000121189	tps-2
WBGene00185014	4537.97	1.82969	0.295799	6.18561	6.19e-10	2.58e-09	F17C8.9
WBGene00007361	112.687	1.82953	0.581584	3.14576	0.00165654	0.00334546	oac-3
WBGene00018734	6139.85	1.82811	0.299174	6.11054	9.93e-10	4.07e-09	F53A10.2
WBGene00020689	2105.74	1.828	0.287677	6.35435	2.09e-10	9.07e-10	npr-12
WBGene00004445	54762.6	1.8275	0.30549	5.98218	2.2e-09	8.77e-09	rpl-31
WBGene00008023	185.181	1.82721	0.278755	6.55488	5.57e-11	2.55e-10	C39B10.3
WBGene00019513	1992.4	1.82679	0.273772	6.67269	2.51e-11	1.19e-10	lido-7
WBGene00020805	128.002	1.82615	0.5904	3.09308	0.00198094	0.00395064	T25F10.1
WBGene00011015	25385.6	1.82499	0.202288	9.02174	1.85e-19	1.6e-18	R04F11.2
WBGene00003599	11628.9	1.82471	0.216865	8.41404	3.96e-17	2.94e-16	nhl-3
WBGene00003519	15723.2	1.82394	0.396557	4.59945	4.24e-06	1.2e-05	nac-3
WBGene00001683	617.057	1.8237	0.452261	4.03239	5.52e-05	0.000137101	gpd-1
WBGene00021534	14973.4	1.82267	0.321833	5.66341	1.48e-08	5.47e-08	mvk-1
WBGene00001991	1121.6	1.82227	0.235415	7.74067	9.89e-15	6.14e-14	hot-6
WBGene00009049	3201.03	1.82159	0.150341	12.1164	8.64e-34	1.74e-32	F22B8.7
WBGene00019207	13128.7	1.82117	0.216149	8.42553	3.59e-17	2.67e-16	fgt-1
WBGene00020461	142.951	1.8173	0.30905	5.88029	4.1e-09	1.59e-08	T12C9.7
WBGene00219241	25.9376	1.81561	0.601441	3.01876	0.00253809	0.0049711	Y116A8A.150
WBGene00012317	6778.97	1.81492	0.377844	4.80336	1.56e-06	4.67e-06	ztf-6
WBGene00010416	7751.92	1.8132	0.303231	5.97961	2.24e-09	8.9e-09	hxk-2
WBGene00019316	34.2308	1.81288	0.693461	2.61425	0.00894225	0.0159673	K02E7.12
WBGene00004779	2544.03	1.81267	0.302371	5.99483	2.04e-09	8.14e-09	ser-4
WBGene00001769	222.416	1.8124	0.693313	2.61411	0.00894603	0.0159728	gst-21
WBGene00021494	139.849	1.81227	0.549802	3.29621	0.000979971	0.00205006	Y40B10B.1
WBGene00011298	2533.37	1.81218	0.248815	7.28323	3.26e-13	1.8e-12	R107.2
WBGene00021008	59.0307	1.81067	0.594895	3.04367	0.00233709	0.00460586	W03F11.5
WBGene00044068	6142.55	1.81041	0.31713	5.70874	1.14e-08	4.24e-08	syd-9
WBGene00019639	114.609	1.80844	0.326277	5.54265	2.98e-08	1.06e-07	K10F12.7
WBGene00004465	4916.85	1.80598	0.219657	8.22181	2e-16	1.41e-15	rpn-9
WBGene00022087	3003.86	1.80566	0.250672	7.20329	5.88e-13	3.18e-12	Y69A2AR.16
WBGene00017834	111846	1.8029	0.302588	5.95827	2.55e-09	1.01e-08	F26F12.3
WBGene00019866	86.7154	1.80116	0.421133	4.27693	1.89e-05	4.99e-05	R04B3.1
WBGene00000529	4151.87	1.80098	0.290501	6.19957	5.66e-10	2.36e-09	clh-2
WBGene00009390	136.858	1.80023	0.367579	4.89755	9.7e-07	2.97e-06	F35C5.1
WBGene00006573	3556.83	1.79984	0.236247	7.61846	2.57e-14	1.55e-13	tin-10
WBGene00000046	729.593	1.79968	0.370054	4.86328	1.15e-06	3.51e-06	acr-7
WBGene00021078	5987.94	1.79837	0.278341	6.46104	1.04e-10	4.65e-10	unc-132
WBGene00000055	937.639	1.79736	0.219525	8.18749	2.67e-16	1.86e-15	acr-16
WBGene00003927	5603.53	1.79686	0.219645	8.18075	2.82e-16	1.96e-15	pas-6
WBGene00000901	25172.2	1.79654	0.270193	6.64912	2.95e-11	1.38e-10	daf-5
WBGene00012073	2094.84	1.79579	0.330253	5.43761	5.4e-08	1.87e-07	cpd-2
WBGene00022236	18.1264	1.79423	0.826112	2.17189	0.0298637	0.0482827	Y73B6BL.12
WBGene00021839	8380.79	1.79386	0.2118	8.46961	2.46e-17	1.86e-16	nduf-5
WBGene00017926	13477	1.79224	0.200762	8.92719	4.37e-19	3.67e-18	cox-6C
WBGene00012713	6523.95	1.79198	0.258089	6.94327	3.83e-12	1.94e-11	bckd-1A
WBGene00021046	696.545	1.79159	0.27695	6.469	9.87e-11	4.42e-10	sedl-1
WBGene00010772	9264.19	1.79105	0.328706	5.44879	5.07e-08	1.76e-07	K11D9.3
WBGene00001596	10570.1	1.78854	0.270672	6.60777	3.9e-11	1.81e-10	gld-2
WBGene00020867	1528.19	1.78805	0.223197	8.01109	1.14e-15	7.6e-15	shc-2
WBGene00010563	48.0377	1.78512	0.627386	2.84533	0.00443655	0.00836217	K04G2.4
WBGene00014914	171.926	1.78486	0.382999	4.66024	3.16e-06	9.12e-06	Y52B11A.11
WBGene00019459	15.1826	1.78383	0.770959	2.31378	0.0206798	0.0344612	K06H7.8
WBGene00021363	2000.1	1.78332	0.30699	5.80904	6.28e-09	2.4e-08	taf-6.2
WBGene00010505	71.7593	1.78136	0.479956	3.7115	0.000206035	0.000475536	K02D3.2
WBGene00007385	42770.4	1.78119	0.252473	7.05497	1.73e-12	9.01e-12	atp-5
WBGene00009851	6248.89	1.78014	0.141243	12.6034	2.02e-36	4.67e-35	F48F7.6
WBGene00014145	1053.29	1.77954	0.240099	7.41168	1.25e-13	7.14e-13	ZK899.7
WBGene00014871	607.15	1.77889	0.304925	5.83387	5.42e-09	2.08e-08	Y37H9A.5
WBGene00009142	37172.8	1.77706	0.502835	3.53409	0.000409181	0.00090527	F26A3.4
WBGene00022675	7553.34	1.77476	0.273503	6.489	8.64e-11	3.89e-10	gbb-2
WBGene00015957	1218.83	1.77395	0.3295	5.38377	7.29e-08	2.5e-07	del-9
WBGene00013603	2229.55	1.77341	0.250768	7.07193	1.53e-12	7.99e-12	soem-1
WBGene00004959	213.593	1.77341	0.308495	5.74858	9e-09	3.38e-08	spe-5
WBGene00005269	88.7818	1.77025	0.578056	3.06242	0.00219557	0.00434982	srh-46
WBGene00012605	504.835	1.76966	0.256595	6.89669	5.32e-12	2.66e-11	Y38F1A.1
WBGene00019227	2423.72	1.76877	0.278366	6.35412	2.1e-10	9.09e-10	sgca-1
WBGene00002975	709.637	1.76826	0.206671	8.55592	1.17e-17	8.98e-17	lev-8
WBGene00019686	5704.48	1.76301	0.357651	4.92942	8.25e-07	2.54e-06	K12H6.6
WBGene00001132	16694.4	1.76258	0.27796	6.34113	2.28e-10	9.86e-10	alp-1
WBGene00009776	7349.63	1.7625	0.197777	8.91157	5.03e-19	4.21e-18	F46B6.12
WBGene00008262	43879.1	1.7617	0.232622	7.57324	3.64e-14	2.17e-13	ril-1
WBGene00044325	1752.21	1.76122	0.185787	9.47978	2.55e-21	2.45e-20	tag-321
WBGene00000912	20335.9	1.75999	0.260272	6.7621	1.36e-11	6.58e-11	daf-16
WBGene00008274	13091.9	1.75948	0.495572	3.5504	0.000384648	0.000854689	C53B4.4
WBGene00009581	45.9078	1.75851	0.574659	3.06009	0.00221273	0.0043811	F40F9.3
WBGene00010771	494.05	1.75573	0.265614	6.61009	3.84e-11	1.78e-10	K11D2.5
WBGene00001915	12224	1.75532	0.394739	4.44677	8.72e-06	2.38e-05	his-41
WBGene00017791	66.0517	1.75181	0.459654	3.81116	0.000138318	0.000326545	try-8
WBGene00006585	10368.5	1.75175	0.452423	3.87192	0.000107979	0.000258169	tni-3
WBGene00017938	902.417	1.75172	0.280972	6.23451	4.53e-10	1.91e-09	F31A3.3
WBGene00009974	8046.72	1.75092	0.189284	9.25023	2.24e-20	2.04e-19	F53C11.4
WBGene00014261	5519.09	1.75034	0.234974	7.44908	9.4e-14	5.42e-13	shk-1
WBGene00206355	96.5196	1.75022	0.383275	4.56649	4.96e-06	1.4e-05	C34C6.10
WBGene00002855	9588	1.75021	0.229702	7.61948	2.55e-14	1.54e-13	let-721
WBGene00018478	140.594	1.75013	0.399078	4.38544	1.16e-05	3.12e-05	otpl-5
WBGene00000955	2307.78	1.7497	0.173669	10.0749	7.13e-24	7.98e-23	des-2
WBGene00009576	290.541	1.74819	0.304077	5.74918	8.97e-09	3.37e-08	F40F8.3
WBGene00010419	95106.7	1.7465	0.273616	6.38303	1.74e-10	7.59e-10	atp-1
WBGene00011214	48.1553	1.74638	0.508268	3.43595	0.000590486	0.00127532	R10E9.2
WBGene00018309	122.839	1.74632	0.678435	2.57404	0.010052	0.0177894	F41G4.5
WBGene00011044	409.095	1.74387	0.281162	6.20236	5.56e-10	2.32e-09	R05H10.3
WBGene00015796	114.516	1.74249	0.481463	3.61916	0.000295559	0.000666732	C15F1.5
WBGene00007630	7328.67	1.7421	0.293286	5.93994	2.85e-09	1.12e-08	har-1
WBGene00019512	54.8216	1.74151	0.366089	4.75706	1.96e-06	5.81e-06	K08A2.2
WBGene00009584	9052	1.741	0.249782	6.97011	3.17e-12	1.61e-11	drap-1
WBGene00019295	3384.44	1.74074	0.293537	5.93023	3.03e-09	1.19e-08	pfkb-1.2
WBGene00005421	31.5257	1.7407	0.593932	2.93081	0.00338079	0.00649066	srh-211
WBGene00016259	54.4294	1.73981	0.6119	2.84329	0.0044651	0.00840824	C30F8.3
WBGene00013597	22117.7	1.73932	0.206426	8.42591	3.58e-17	2.66e-16	gpi-1
WBGene00000885	323.712	1.73654	0.375126	4.62922	3.67e-06	1.05e-05	cyn-9
WBGene00020315	8508.42	1.73653	0.534541	3.24864	0.00115958	0.00239905	T07E3.4
WBGene00011957	330.421	1.73602	0.410724	4.22673	2.37e-05	6.16e-05	T23F11.6
WBGene00004452	34071.4	1.73599	0.292937	5.92616	3.1e-09	1.22e-08	rpl-38
WBGene00050937	546.781	1.73517	0.442167	3.92425	8.7e-05	0.000210716	R02D5.8
WBGene00001554	701.786	1.73235	0.338993	5.11027	3.22e-07	1.03e-06	gcy-34
WBGene00077682	14.0254	1.73063	0.775021	2.233	0.0255486	0.0418532	F58B4.7
WBGene00000368	6435.79	1.73007	0.284691	6.07701	1.22e-09	4.97e-09	ccb-1
WBGene00000189	761.584	1.73003	0.188153	9.19479	3.76e-20	3.38e-19	arl-5
WBGene00001503	14851.9	1.72999	0.214861	8.05166	8.17e-16	5.53e-15	fum-1
WBGene00011510	43304.5	1.72985	0.153015	11.3051	1.24e-29	1.95e-28	pdha-1
WBGene00004178	1925.76	1.72961	0.267578	6.46394	1.02e-10	4.56e-10	prg-1
WBGene00008690	1049.46	1.72942	0.270589	6.3913	1.64e-10	7.21e-10	F11C1.1
WBGene00017761	438.556	1.7292	0.284333	6.08159	1.19e-09	4.84e-09	F23H11.6
WBGene00004882	4340.23	1.72814	0.217615	7.94129	2e-15	1.32e-14	smg-4
WBGene00020688	44.0129	1.72812	0.576581	2.99718	0.00272491	0.00530792	T22D1.11
WBGene00016427	653.655	1.72656	0.218921	7.88667	3.1e-15	2.01e-14	C34H4.5
WBGene00003413	4180.87	1.72612	0.400822	4.30646	1.66e-05	4.4e-05	mrp-7
WBGene00022042	40239.8	1.72575	0.209623	8.23261	1.83e-16	1.29e-15	icd-2
WBGene00008190	14.4505	1.72573	0.726733	2.37464	0.0175661	0.029701	clec-114
WBGene00021440	1484.96	1.72557	0.233153	7.40101	1.35e-13	7.7e-13	Y39A3CL.1
WBGene00006993	2695.15	1.7251	0.277768	6.21058	5.28e-10	2.21e-09	zyg-8
WBGene00003238	3215.84	1.72431	0.307044	5.61584	1.96e-08	7.12e-08	mig-1
WBGene00044459	360.266	1.72364	0.271521	6.34807	2.18e-10	9.44e-10	Y55F3C.9
WBGene00012235	948.789	1.72353	0.209863	8.21263	2.16e-16	1.52e-15	W04A4.6
WBGene00022251	1496.28	1.72331	0.179043	9.6251	6.26e-22	6.27e-21	blos-2
WBGene00007415	44.1339	1.72185	0.689036	2.49892	0.0124572	0.0216863	C07E3.4
WBGene00019354	9051.86	1.72112	0.217814	7.90179	2.75e-15	1.78e-14	K03B4.2
WBGene00007176	3573.37	1.72091	0.35331	4.87084	1.11e-06	3.38e-06	kcnl-1
WBGene00003923	7367.94	1.72003	0.22217	7.74194	9.79e-15	6.09e-14	pas-2
WBGene00007054	13779.9	1.71753	0.290746	5.9073	3.48e-09	1.36e-08	scpl-1
WBGene00003030	5724.51	1.71589	0.320883	5.34742	8.92e-08	3.03e-07	lin-45
WBGene00016173	8657.5	1.71548	0.244081	7.02833	2.09e-12	1.08e-11	fust-1
WBGene00008691	1733.42	1.71524	0.312189	5.49424	3.92e-08	1.38e-07	mff-1
WBGene00006733	5184.08	1.71501	0.180675	9.49221	2.26e-21	2.19e-20	ufd-1
WBGene00000281	6230.61	1.71355	0.260628	6.57469	4.88e-11	2.24e-10	cah-3
WBGene00007667	1041.03	1.71353	0.289365	5.92169	3.19e-09	1.25e-08	fbxa-97
WBGene00010484	3515.29	1.7133	0.315132	5.43676	5.43e-08	1.88e-07	dph-3
WBGene00013601	2108.69	1.71305	0.205141	8.35062	6.79e-17	4.95e-16	Y87G2A.13
WBGene00006255	33.3088	1.71202	0.46859	3.65355	0.000258634	0.000587794	str-224
WBGene00001684	65508.1	1.71163	0.238932	7.1637	7.85e-13	4.2e-12	gpd-2
WBGene00020012	13664.7	1.71144	0.30253	5.65708	1.54e-08	5.66e-08	R11G1.6
WBGene00021959	2074.83	1.71141	0.270629	6.32381	2.55e-10	1.1e-09	Y57E12AL.6
WBGene00020509	2759.5	1.70956	0.210385	8.1259	4.44e-16	3.05e-15	hex-1
WBGene00009549	203.488	1.70842	0.331531	5.15312	2.56e-07	8.28e-07	F38H4.5
WBGene00012982	4227.73	1.70786	0.220284	7.753	8.97e-15	5.59e-14	jmjd-2
WBGene00022235	29902	1.70691	0.244749	6.97414	3.08e-12	1.57e-11	sqd-1
WBGene00004501	6660.92	1.70549	0.198085	8.60987	7.31e-18	5.72e-17	rpt-1
WBGene00206532	179.953	1.70542	0.358304	4.75968	1.94e-06	5.74e-06	F11A6.15
WBGene00021474	9456.99	1.70494	0.304465	5.59979	2.15e-08	7.78e-08	dot-1.1
WBGene00012820	49.1932	1.704	0.483231	3.52627	0.000421452	0.000930226	Y43F8B.10
WBGene00021513	117.192	1.70324	0.576844	2.9527	0.00315012	0.00608098	Y41D4B.6
WBGene00020427	1539.58	1.70309	0.250362	6.80249	1.03e-11	5.02e-11	sav-1
WBGene00012158	40022.1	1.70291	0.221315	7.69454	1.42e-14	8.73e-14	ucr-2.1
WBGene00009475	3653.32	1.70243	0.294555	5.77966	7.49e-09	2.84e-08	F36F2.1
WBGene00006647	1494.96	1.70172	0.246035	6.91657	4.63e-12	2.33e-11	tsr-1
WBGene00000211	2002.56	1.70167	0.221652	7.67724	1.63e-14	9.94e-14	asm-1
WBGene00219374	296.752	1.7016	0.318945	5.33508	9.55e-08	3.23e-07	C25A11.10
WBGene00270322	2018.96	1.70043	0.504729	3.36899	0.000754432	0.00160221	C17G10.13
WBGene00011440	6779.59	1.69895	0.197422	8.60568	7.59e-18	5.93e-17	sfxn-1.5
WBGene00001519	4254.97	1.69802	0.214133	7.92975	2.2e-15	1.44e-14	gar-3
WBGene00013881	874.973	1.69521	0.234144	7.24002	4.49e-13	2.45e-12	mans-4
WBGene00008408	1500.01	1.6952	0.450231	3.76517	0.000166437	0.000388491	D2023.4
WBGene00013131	683.718	1.6942	0.284463	5.95578	2.59e-09	1.02e-08	pigl-1
WBGene00006823	19719.1	1.69286	0.257563	6.57261	4.94e-11	2.27e-10	unc-94
WBGene00020181	17198.1	1.69282	0.22227	7.61603	2.62e-14	1.58e-13	T02H6.11
WBGene00016029	136.897	1.69266	0.477622	3.54392	0.000394225	0.000874331	elf-1
WBGene00018046	897.779	1.69236	0.252881	6.69233	2.2e-11	1.04e-10	coa-3
WBGene00009064	1829.49	1.69193	0.295982	5.71631	1.09e-08	4.06e-08	F22G12.4
WBGene00006383	1339.27	1.68966	0.306849	5.50648	3.66e-08	1.29e-07	taf-2
WBGene00019283	21.9259	1.68963	0.55484	3.04526	0.00232482	0.0045841	K01A2.9
WBGene00015250	5266.74	1.68856	0.226327	7.46069	8.61e-14	4.98e-13	B0546.3
WBGene00017828	2654.44	1.68831	0.168788	10.0026	1.48e-23	1.64e-22	F26F4.6
WBGene00004464	5841.5	1.68764	0.218762	7.71447	1.21e-14	7.51e-14	rpn-8
WBGene00022406	60.9246	1.68759	0.52668	3.20421	0.00135434	0.00277497	srsx-7
WBGene00021031	87.9113	1.68759	0.433681	3.89131	9.97e-05	0.000239734	W04H10.2
WBGene00017818	949.148	1.68454	0.275988	6.10367	1.04e-09	4.24e-09	F26D11.20
WBGene00021287	134.178	1.68421	0.462632	3.64049	0.00027212	0.000616266	Y24D9B.1
WBGene00012468	7456.14	1.6839	0.374636	4.49477	6.96e-06	1.92e-05	Y17G7B.17
WBGene00015582	36.4609	1.68302	0.633639	2.65613	0.00790442	0.0142474	C07H6.9
WBGene00022306	12586.2	1.68175	0.175987	9.55612	1.22e-21	1.2e-20	hxk-3
WBGene00043060	6276.41	1.68085	0.196232	8.5656	1.08e-17	8.28e-17	R144.12
WBGene00000092	7289.6	1.68043	0.204747	8.20734	2.26e-16	1.58e-15	ags-3
WBGene00022270	814.478	1.68018	0.280958	5.98017	2.23e-09	8.87e-09	Y73E7A.3
WBGene00018657	9864.41	1.67867	0.228121	7.35871	1.86e-13	1.05e-12	acl-4
WBGene00016458	8878.09	1.67856	0.219996	7.62996	2.35e-14	1.42e-13	C35E7.6
WBGene00018569	1723.16	1.67855	0.549525	3.05455	0.00225395	0.00445567	F47F2.1
WBGene00012980	6253.19	1.6773	0.282917	5.92859	3.06e-09	1.2e-08	efhd-1
WBGene00194641	1659.28	1.67711	0.230324	7.28155	3.3e-13	1.82e-12	F47G3.4
WBGene00010868	15316.9	1.67545	0.215397	7.77844	7.34e-15	4.61e-14	somi-1
WBGene00016846	1298.55	1.67493	0.263334	6.36049	2.01e-10	8.73e-10	C50F7.6
WBGene00018405	6064.72	1.6747	0.182226	9.19022	3.92e-20	3.52e-19	F44A2.5
WBGene00009164	17622.5	1.6747	0.191183	8.75964	1.96e-18	1.59e-17	hrdl-1
WBGene00022804	36.0528	1.67435	0.728287	2.29903	0.0215034	0.0357465	ZK697.1
WBGene00008390	106.827	1.67195	0.550598	3.0366	0.00239262	0.00470708	D1086.3
WBGene00004680	3355.52	1.67141	0.198533	8.41878	3.8e-17	2.82e-16	rars-2
WBGene00017042	711.352	1.6713	0.242526	6.8912	5.53e-12	2.76e-11	D2007.2
WBGene00003184	172.012	1.6708	0.3189	5.23925	1.61e-07	5.33e-07	mei-2
WBGene00020185	11796.6	1.67035	0.244962	6.81883	9.18e-12	4.51e-11	pgk-1
WBGene00206521	101.317	1.67007	0.473626	3.52614	0.000421665	0.000930606	T02G5.15
WBGene00000209	2700.96	1.66993	0.209655	7.96516	1.65e-15	1.09e-14	asg-1
WBGene00006205	97.2915	1.66987	0.473299	3.52815	0.000418467	0.000924091	str-160
WBGene00018756	23413.2	1.66984	0.225661	7.39975	1.36e-13	7.77e-13	plpp-1.1
WBGene00016099	1474.81	1.66864	0.213626	7.81101	5.67e-15	3.59e-14	C25E10.10
WBGene00011309	496.478	1.66755	0.281688	5.91986	3.22e-09	1.26e-08	R186.8
WBGene00008398	6167.87	1.66699	0.376752	4.42464	9.66e-06	2.63e-05	D2005.3
WBGene00011119	2477.22	1.66635	0.25778	6.46423	1.02e-10	4.56e-10	mpc-1
WBGene00020950	23650.7	1.66631	0.196816	8.46635	2.53e-17	1.9e-16	dlst-1
WBGene00013639	6198.93	1.66579	0.3124	5.33223	9.7e-08	3.28e-07	Y105C5A.15
WBGene00023067	1466.28	1.66549	0.228783	7.27978	3.34e-13	1.84e-12	rpl-41.1
WBGene00016506	1855.38	1.66469	0.20068	8.29522	1.08e-16	7.76e-16	abhd-5.1
WBGene00006433	12301	1.66446	0.277229	6.00392	1.93e-09	7.72e-09	sdhb-1
WBGene00018291	167.813	1.66407	0.476392	3.49306	0.000477522	0.00104599	fip-4
WBGene00012179	28279.9	1.66402	0.255445	6.5142	7.31e-11	3.31e-10	W01D2.1
WBGene00045468	45.4975	1.66351	0.649621	2.56074	0.0104449	0.0184298	F08A8.8
WBGene00045356	104.393	1.66343	0.451683	3.68275	0.000230732	0.000528541	T03E6.9
WBGene00004456	49213.1	1.66331	0.288489	5.76559	8.14e-09	3.08e-08	rpl-43
WBGene00016792	4002.88	1.66239	0.2197	7.56665	3.83e-14	2.28e-13	C49H3.6
WBGene00012221	2946.83	1.6617	0.290886	5.71256	1.11e-08	4.15e-08	W03C9.5
WBGene00015267	839.466	1.66145	0.219575	7.56667	3.83e-14	2.28e-13	chin-1
WBGene00001036	856.056	1.65898	0.263887	6.2867	3.24e-10	1.38e-09	dnj-18
WBGene00006614	3342.81	1.65864	0.257124	6.45072	1.11e-10	4.96e-10	trp-1
WBGene00012864	666.501	1.65694	0.253857	6.52707	6.71e-11	3.05e-10	Y45F3A.9
WBGene00017185	33.4945	1.65667	0.569377	2.90963	0.00361862	0.00692247	F07B7.1
WBGene00006392	4371.32	1.65636	0.275223	6.01826	1.76e-09	7.09e-09	taf-10
WBGene00013463	16181	1.65609	0.251434	6.58658	4.5e-11	2.08e-10	kdp-1
WBGene00005976	61.1856	1.65387	0.490841	3.36946	0.000753169	0.00160028	srx-85
WBGene00002189	25039	1.65365	0.246873	6.69839	2.11e-11	1e-10	kin-1
WBGene00006570	3380.24	1.65341	0.28571	5.78703	7.16e-09	2.72e-08	tig-2
WBGene00019832	705.238	1.65252	0.433363	3.81325	0.00013715	0.000324027	osg-1
WBGene00022499	8152.82	1.65217	0.284904	5.79903	6.67e-09	2.54e-08	set-30
WBGene00010654	35.2611	1.65095	0.547037	3.01799	0.00254461	0.00498213	K08C9.7
WBGene00003618	21327.8	1.65084	0.292832	5.63751	1.73e-08	6.32e-08	nhr-19
WBGene00009353	5371.9	1.64974	0.321493	5.13148	2.87e-07	9.24e-07	sdhd-1
WBGene00003950	6085.52	1.64681	0.218493	7.53712	4.8e-14	2.84e-13	pbs-4
WBGene00010935	20537.6	1.64655	0.247264	6.65905	2.76e-11	1.3e-10	M163.1
WBGene00022089	47030.7	1.64607	0.20265	8.12271	4.56e-16	3.13e-15	Y69A2AR.18
WBGene00020511	10737.8	1.64569	0.246276	6.68231	2.35e-11	1.11e-10	immt-1
WBGene00003559	3448.33	1.64549	0.239661	6.8659	6.61e-12	3.28e-11	ncl-1
WBGene00004945	4985.2	1.64521	0.175037	9.39922	5.5e-21	5.16e-20	sop-2
WBGene00015391	13514.4	1.64498	0.345124	4.76636	1.88e-06	5.56e-06	sdha-1
WBGene00008317	7163.9	1.6448	0.266022	6.18296	6.29e-10	2.62e-09	C54G4.7
WBGene00004892	10025.5	1.64237	0.274216	5.98933	2.11e-09	8.41e-09	sms-1
WBGene00002005	86593	1.64228	0.224914	7.30182	2.84e-13	1.58e-12	hsp-1
WBGene00044924	888.007	1.64225	0.212568	7.72577	1.11e-14	6.89e-14	M106.7
WBGene00020707	66.6938	1.64223	0.39645	4.14235	3.44e-05	8.76e-05	wago-10
WBGene00018750	2004.93	1.64175	0.443503	3.70177	0.000214097	0.000493094	F53C3.6
WBGene00012094	3408.99	1.64149	0.255338	6.42871	1.29e-10	5.7e-10	T27E9.2
WBGene00008919	10423.8	1.64149	0.362154	4.53256	5.83e-06	1.63e-05	vps-36
WBGene00001373	460.8	1.63858	0.310541	5.27653	1.32e-07	4.39e-07	exp-1
WBGene00021757	1209.59	1.63622	0.221266	7.39482	1.42e-13	8.06e-13	taco-1
WBGene00019697	7481.65	1.63551	0.261289	6.25941	3.86e-10	1.64e-09	M01B12.4
WBGene00021682	1067.99	1.63518	0.280324	5.83316	5.44e-09	2.09e-08	Y48G1C.9
WBGene00001751	5093.91	1.63463	0.163506	9.9974	1.56e-23	1.72e-22	gst-3
WBGene00007646	18581.1	1.63424	0.345246	4.73354	2.21e-06	6.49e-06	nkb-1
WBGene00000640	65.3992	1.6341	0.394235	4.145	3.4e-05	8.66e-05	col-64
WBGene00021750	281.774	1.6339	0.306722	5.32695	9.99e-08	3.37e-07	Y50D4C.6
WBGene00004980	18405.6	1.63243	0.23284	7.01095	2.37e-12	1.22e-11	spk-1
WBGene00001490	4701.56	1.63156	0.325895	5.00639	5.55e-07	1.74e-06	frm-3
WBGene00008939	2392.65	1.63145	0.207056	7.87927	3.29e-15	2.12e-14	F18H3.1
WBGene00077643	847.823	1.63035	0.161628	10.087	6.3e-24	7.07e-23	trpp-1
WBGene00077539	196.363	1.62931	0.336243	4.84564	1.26e-06	3.82e-06	Y52B11A.12
WBGene00010887	1815.66	1.62888	0.24728	6.58719	4.48e-11	2.07e-10	M7.12
WBGene00003898	2976.2	1.62884	0.248398	6.55737	5.48e-11	2.51e-10	oxi-1
WBGene00007631	59.7568	1.62741	0.555227	2.93108	0.00337786	0.00648559	wht-3
WBGene00021890	16402.4	1.62736	0.210654	7.72527	1.12e-14	6.91e-14	Y54G2A.26
WBGene00012358	3686.22	1.62736	0.205416	7.92223	2.33e-15	1.52e-14	W09D6.5
WBGene00018165	13.1669	1.62669	0.742249	2.19157	0.0284108	0.0461106	F38A5.8
WBGene00004751	5322.25	1.62667	0.341475	4.76365	1.9e-06	5.63e-06	sea-2
WBGene00011234	179.625	1.62491	0.479321	3.39002	0.000698874	0.00149266	R11A5.6
WBGene00044137	35.377	1.62456	0.57708	2.81514	0.00487553	0.00911631	F28H6.8
WBGene00023068	51657.1	1.62425	0.224767	7.22638	4.96e-13	2.7e-12	rpl-41.2
WBGene00021469	42825.1	1.62397	0.186593	8.70327	3.22e-18	2.58e-17	Y39G10AR.11
WBGene00043705	228.756	1.62222	0.283426	5.72359	1.04e-08	3.9e-08	egrh-2
WBGene00006715	3560.76	1.62046	0.21106	7.67772	1.62e-14	9.9e-14	ubc-20
WBGene00004787	494.58	1.61976	0.290856	5.56895	2.56e-08	9.21e-08	sft-1
WBGene00020894	12993.3	1.61902	0.312462	5.1815	2.2e-07	7.17e-07	T28D9.1
WBGene00018024	7703.53	1.61827	0.687613	2.35346	0.0185996	0.0312934	F35A5.1
WBGene00000064	13122.8	1.61522	0.281936	5.72902	1.01e-08	3.78e-08	act-2
WBGene00009220	405.239	1.61513	0.323241	4.99667	5.83e-07	1.82e-06	F28D9.4
WBGene00012553	34407.5	1.61476	0.205082	7.87373	3.44e-15	2.21e-14	cox-5A
WBGene00009141	3310.66	1.61368	0.215527	7.48714	7.04e-14	4.1e-13	ncbp-2
WBGene00020029	5106.59	1.61297	0.170631	9.45295	3.29e-21	3.14e-20	R12C12.9
WBGene00017296	67.7332	1.61197	0.692572	2.3275	0.0199385	0.0333517	F09E10.6
WBGene00007608	223.644	1.61144	0.290713	5.54306	2.97e-08	1.06e-07	C15C8.6
WBGene00014232	5232.63	1.61034	0.22716	7.089	1.35e-12	7.09e-12	ttll-4
WBGene00014097	166.749	1.61026	0.618281	2.60442	0.00920298	0.0163939	ZK829.9
WBGene00044616	24.3702	1.60957	0.708514	2.27175	0.0231018	0.0381697	M01A12.4
WBGene00007739	54.6616	1.60928	0.694494	2.3172	0.0204926	0.0341872	C26C6.4
WBGene00009740	6968.52	1.60925	0.273437	5.88526	3.97e-09	1.55e-08	F45H10.3
WBGene00014024	80.9412	1.60807	0.5869	2.73994	0.00614499	0.0112977	ZK637.4
WBGene00009139	2515.64	1.60768	0.253889	6.33222	2.42e-10	1.04e-09	F25H9.7
WBGene00044648	729.486	1.60614	0.211395	7.5978	3.01e-14	1.81e-13	R144.13
WBGene00018307	173.667	1.60535	0.616804	2.60269	0.00924961	0.0164704	dyla-1
WBGene00010573	1350.23	1.60473	0.365094	4.39538	1.11e-05	2.99e-05	K04H4.2
WBGene00013970	4795.81	1.60433	0.20028	8.01045	1.14e-15	7.64e-15	klu-1
WBGene00003163	28029.3	1.60412	0.466624	3.43772	0.000586631	0.00126784	mdl-1
WBGene00007261	5218.04	1.60271	0.322285	4.97295	6.59e-07	2.05e-06	lron-3
WBGene00008443	7401.42	1.60219	0.260534	6.14963	7.77e-10	3.21e-09	pde-3
WBGene00021562	18854.7	1.60135	0.189765	8.43863	3.21e-17	2.4e-16	nuo-5
WBGene00000230	48749.5	1.60019	0.224257	7.13552	9.64e-13	5.12e-12	atp-3
WBGene00006985	2171.71	1.59928	0.228227	7.00738	2.43e-12	1.25e-11	zig-8
WBGene00021629	5156.61	1.5984	0.235049	6.80029	1.04e-11	5.1e-11	scpl-3
WBGene00003638	6194.54	1.59796	0.362311	4.41045	1.03e-05	2.8e-05	nhr-48
WBGene00007350	14206.1	1.5959	0.284708	5.6054	2.08e-08	7.55e-08	sucl-1
WBGene00000283	3202.23	1.59453	0.197842	8.05962	7.65e-16	5.19e-15	cah-5
WBGene00022078	12218.1	1.59313	0.331649	4.80367	1.56e-06	4.66e-06	epg-9
WBGene00006797	1125.16	1.59068	0.298427	5.33021	9.81e-08	3.32e-07	unc-63
WBGene00012813	14110	1.58944	0.341738	4.65105	3.3e-06	9.51e-06	Y43F8B.2
WBGene00020092	8848.87	1.58937	0.235458	6.75012	1.48e-11	7.11e-11	pcf-11
WBGene00018607	2735.88	1.58669	0.348449	4.55358	5.27e-06	1.48e-05	F48E3.8
WBGene00007907	11076.4	1.58656	0.601601	2.63723	0.00835857	0.0149964	C34B4.2
WBGene00050936	221.904	1.58401	0.387955	4.08297	4.45e-05	0.000111704	ZK856.16
WBGene00016974	2099.2	1.58394	0.577782	2.74142	0.00611749	0.0112526	lron-15
WBGene00000988	2858.07	1.58342	0.333029	4.75461	1.99e-06	5.88e-06	dhs-25
WBGene00044641	52.3154	1.58298	0.469849	3.36912	0.000754074	0.00160175	T01D1.8
WBGene00003148	5558.59	1.58284	0.362513	4.3663	1.26e-05	3.39e-05	mbf-1
WBGene00003928	4401.51	1.5824	0.212933	7.43143	1.07e-13	6.17e-13	pas-7
WBGene00189952	139.958	1.58101	0.374061	4.22661	2.37e-05	6.17e-05	K10D2.8
WBGene00020275	21419	1.57997	0.212447	7.43698	1.03e-13	5.92e-13	atp-4
WBGene00001902	69.2023	1.5794	0.43051	3.66868	0.000243807	0.00055651	his-50
WBGene00021914	720.348	1.57935	0.308017	5.12747	2.94e-07	9.44e-07	magu-1
WBGene00021927	1652.22	1.57892	0.289969	5.44515	5.18e-08	1.8e-07	abhd-14
WBGene00003925	3953.33	1.57561	0.258492	6.09538	1.09e-09	4.45e-09	pas-4
WBGene00021314	1035.42	1.575	0.190528	8.26648	1.38e-16	9.83e-16	Y32H12A.6
WBGene00004974	18.8112	1.57425	0.72731	2.16448	0.0304274	0.0491061	spe-29
WBGene00022115	3793.8	1.57291	0.293478	5.35955	8.34e-08	2.84e-07	Y71F9AL.10
WBGene00018765	2994.06	1.57285	0.324374	4.84889	1.24e-06	3.76e-06	mpc-2
WBGene00011639	23424.3	1.57267	0.194588	8.08206	6.37e-16	4.33e-15	ztf-17
WBGene00001371	1400.13	1.57254	0.274263	5.7337	9.83e-09	3.68e-08	exl-1
WBGene00018963	39817.5	1.57242	0.224523	7.00337	2.5e-12	1.28e-11	ucr-1
WBGene00001173	33059.6	1.5712	0.244354	6.43005	1.28e-10	5.65e-10	egl-4
WBGene00019651	1749.05	1.57073	0.252724	6.21519	5.13e-10	2.15e-09	K11D12.12
WBGene00001911	31209.4	1.57068	0.258856	6.06778	1.3e-09	5.26e-09	his-18
WBGene00011345	941.044	1.56875	0.318633	4.92337	8.51e-07	2.62e-06	dma-1
WBGene00006727	21613	1.5685	0.236883	6.62142	3.56e-11	1.66e-10	ubq-1
WBGene00017191	347.073	1.56829	0.330358	4.74725	2.06e-06	6.09e-06	C01B7.7
WBGene00018356	2543.03	1.56815	0.201481	7.78311	7.08e-15	4.45e-14	islo-1
WBGene00014096	19377.6	1.56762	0.188785	8.30373	1.01e-16	7.25e-16	ZK829.7
WBGene00004277	9164.26	1.56686	0.19436	8.06166	7.53e-16	5.11e-15	rab-18
WBGene00004278	8621.12	1.56629	0.207545	7.54677	4.46e-14	2.64e-13	rab-19
WBGene00007390	2257.76	1.56617	0.254754	6.14775	7.86e-10	3.25e-09	lmtr-3
WBGene00018777	1543.8	1.56598	0.225929	6.93128	4.17e-12	2.1e-11	F53H1.3
WBGene00002190	15640.1	1.56595	0.246179	6.36103	2e-10	8.71e-10	kin-2
WBGene00012658	810.489	1.56491	0.2685	5.82833	5.6e-09	2.15e-08	Y39A1A.21
WBGene00011723	7175.21	1.5646	0.178945	8.74348	2.26e-18	1.82e-17	T12A7.2
WBGene00017889	3887.68	1.56388	0.220567	7.09025	1.34e-12	7.03e-12	F28B3.10
WBGene00016030	2211.18	1.56326	0.263595	5.93056	3.02e-09	1.19e-08	C24A1.3
WBGene00000472	45241.5	1.56247	0.204013	7.65869	1.88e-14	1.15e-13	cey-1
WBGene00007387	1657.29	1.56153	0.188553	8.28165	1.21e-16	8.67e-16	jmjd-5
WBGene00006825	17799.1	1.56132	0.209384	7.45672	8.87e-14	5.12e-13	unc-96
WBGene00003415	6430.86	1.56113	0.156089	10.0016	1.5e-23	1.65e-22	mars-1
WBGene00019895	20890.2	1.56105	0.301998	5.16906	2.35e-07	7.64e-07	aagr-2
WBGene00019480	2531.49	1.56079	0.267738	5.82953	5.56e-09	2.14e-08	K07C11.8
WBGene00004184	8143.93	1.56049	0.326279	4.78269	1.73e-06	5.15e-06	T19D2.2
WBGene00019009	596.245	1.55903	0.261098	5.97106	2.36e-09	9.36e-09	clec-90
WBGene00010623	89.48	1.55884	0.57512	2.71045	0.00671914	0.0122721	K07A12.5
WBGene00011727	4752.69	1.55647	0.217113	7.16895	7.56e-13	4.05e-12	T12A7.6
WBGene00020852	3470.09	1.5556	0.205722	7.56166	3.98e-14	2.36e-13	nhr-228
WBGene00005292	200.317	1.55493	0.267253	5.81821	5.95e-09	2.28e-08	srh-71
WBGene00007583	1959.64	1.55426	0.381191	4.07737	4.55e-05	0.000114262	C14B4.2
WBGene00008164	3191.68	1.55345	0.214417	7.24501	4.32e-13	2.36e-12	C47G2.3
WBGene00010805	1462.25	1.55297	0.26554	5.84834	4.96e-09	1.92e-08	M01E5.2
WBGene00013239	1349.34	1.55089	0.198308	7.82064	5.26e-15	3.34e-14	Y56A3A.22
WBGene00001971	21182.2	1.54901	0.213804	7.245	4.32e-13	2.36e-12	hmg-1.1
WBGene00009920	35278.8	1.54862	0.2318	6.68083	2.38e-11	1.12e-10	abts-1
WBGene00020625	985.745	1.54739	0.192981	8.01837	1.07e-15	7.18e-15	mrrf-1
WBGene00000247	3759.42	1.5473	0.258647	5.98231	2.2e-09	8.77e-09	bec-1
[truncated: 1,719 more rows]

## Sheet: coding decreased in muscle
WB_GeneID	baseMean	log2FoldChange	lfcSE	stat	pvalue	padj	symbol
WBGene00008490	744.307	-12.2349	2.09946	-5.82764	5.62e-09	2.16e-08	F01D4.8
WBGene00003572	587.278	-11.893	1.21002	-9.82874	8.47e-23	8.9e-22	ncx-7
WBGene00017858	504.22	-11.6731	1.20666	-9.67392	3.89e-22	3.93e-21	F27C1.11
WBGene00002188	457.815	-11.5338	1.23296	-9.35459	8.39e-21	7.82e-20	kgb-2
WBGene00009529	426.699	-11.4322	1.29332	-8.83945	9.62e-19	7.93e-18	F38B2.2
WBGene00007072	383.185	-11.2772	1.31554	-8.57229	1.01e-17	7.84e-17	ugt-1
WBGene00012491	360.389	-11.1887	1.24443	-8.99101	2.45e-19	2.1e-18	Y20C6A.1
WBGene00018174	354.945	-11.1667	1.37709	-8.10894	5.11e-16	3.5e-15	F38B6.4
WBGene00007452	340.514	-11.1068	1.22323	-9.07985	1.09e-19	9.51e-19	C08F11.3
WBGene00009239	324.959	-11.0393	1.2276	-8.99257	2.42e-19	2.07e-18	irld-6
WBGene00017466	313.307	-10.9865	1.22172	-8.99262	2.41e-19	2.07e-18	F14F9.3
WBGene00011799	287.233	-10.8613	1.23771	-8.77529	1.7e-18	1.39e-17	T16G1.5
WBGene00013836	282.918	-10.8395	1.23495	-8.77726	1.68e-18	1.37e-17	fbxa-29
WBGene00016174	276.054	-10.8041	1.35445	-7.97672	1.5e-15	9.98e-15	C27H5.4
WBGene00000372	272.308	-10.7842	1.287	-8.37931	5.32e-17	3.91e-16	cyp-13A7
WBGene00012824	269.535	-10.7696	1.2389	-8.69288	3.53e-18	2.82e-17	Y43F8B.14
WBGene00020989	268.56	-10.7642	1.39681	-7.70631	1.3e-14	7.98e-14	W03D8.8
WBGene00006669	266.409	-10.7527	1.21582	-8.84397	9.24e-19	7.63e-18	twk-14
WBGene00020532	264.15	-10.7405	1.25405	-8.56461	1.08e-17	8.35e-17	math-42
WBGene00010899	263.104	-10.7348	1.24794	-8.602	7.83e-18	6.11e-17	M28.8
WBGene00011508	253.745	-10.6823	1.51465	-7.05265	1.76e-12	9.14e-12	T05H10.3
WBGene00003167	244.999	-10.6317	1.21274	-8.76668	1.84e-18	1.49e-17	mec-3
WBGene00000007	238.634	-10.5939	1.24387	-8.51688	1.64e-17	1.25e-16	aat-6
WBGene00219423	233.96	-10.5651	3.90688	-2.70423	0.00684628	0.0124792	C23H5.15
WBGene00017957	229.816	-10.5395	1.22084	-8.63304	5.97e-18	4.7e-17	F31F4.1
WBGene00018215	220.498	-10.4798	1.25942	-8.32107	8.72e-17	6.29e-16	igcm-1
WBGene00021397	218.279	-10.4652	1.26317	-8.28491	1.18e-16	8.45e-16	Y38C1AA.6
WBGene00043066	217.796	-10.462	1.2446	-8.40592	4.25e-17	3.14e-16	acr-25
WBGene00001204	206.935	-10.3882	1.22313	-8.49314	2.01e-17	1.52e-16	egl-38
WBGene00016976	202.65	-10.3581	1.21463	-8.52781	1.49e-17	1.14e-16	C56E10.3
WBGene00022838	200.449	-10.3423	1.25043	-8.27106	1.33e-16	9.46e-16	ZK993.2
WBGene00021262	191.179	-10.2739	1.24952	-8.22233	2e-16	1.4e-15	fbxa-74
WBGene00012967	189.449	-10.2609	1.21391	-8.45271	2.85e-17	2.13e-16	kvs-4
WBGene00018742	188.425	-10.2529	1.25423	-8.17467	2.97e-16	2.06e-15	F53B3.3
WBGene00044332	187.656	-10.247	1.22767	-8.34668	7.02e-17	5.11e-16	clec-36
WBGene00010851	186.099	-10.2352	1.22542	-8.35236	6.69e-17	4.88e-16	M04C3.2
WBGene00016013	184.04	-10.2192	1.38929	-7.35569	1.9e-13	1.07e-12	ugt-66
WBGene00005716	183.031	-10.2112	1.21444	-8.40814	4.17e-17	3.08e-16	srv-5
WBGene00019931	182.18	-10.2045	1.51436	-6.7385	1.6e-11	7.68e-11	R07C12.1
WBGene00020043	181.107	-10.1958	1.21873	-8.3659	5.97e-17	4.36e-16	R13A1.5
WBGene00009339	179.866	-10.1861	1.60055	-6.36409	1.96e-10	8.54e-10	F32G8.3
WBGene00017443	179.145	-10.1802	1.36657	-7.44949	9.37e-14	5.4e-13	F13H8.11
WBGene00001841	178.822	-10.1775	2.37244	-4.2899	1.79e-05	4.72e-05	hen-1
WBGene00001557	176.571	-10.1593	1.21458	-8.36443	6.04e-17	4.41e-16	gcy-37
WBGene00011278	173.636	-10.1349	1.48069	-6.84472	7.66e-12	3.79e-11	R74.2
WBGene00013976	172.423	-10.1251	1.23157	-8.22126	2.01e-16	1.41e-15	hizr-1
WBGene00003698	169.659	-10.1017	1.21777	-8.29528	1.08e-16	7.76e-16	nhr-108
WBGene00015085	169.286	-10.0987	1.23241	-8.19423	2.52e-16	1.76e-15	B0244.10
WBGene00044788	168.375	-10.0908	1.52617	-6.61187	3.8e-11	1.76e-10	ttr-38
WBGene00001468	168.23	-10.0893	1.2556	-8.03547	9.32e-16	6.29e-15	flr-4
WBGene00017396	166.165	-10.0716	2.32248	-4.33657	1.45e-05	3.86e-05	F12A10.7
WBGene00000174	164.095	-10.0537	1.23253	-8.15702	3.43e-16	2.38e-15	aqp-6
WBGene00020748	163.678	-10.0499	1.26001	-7.97605	1.51e-15	1e-14	nhr-221
WBGene00020357	162.693	-10.0413	1.26503	-7.93756	2.06e-15	1.35e-14	T08E11.1
WBGene00017336	161.428	-10.0301	1.28517	-7.80444	5.98e-15	3.77e-14	ugt-41
WBGene00015038	160.529	-10.0216	1.25041	-8.01469	1.1e-15	7.39e-15	nstp-6
WBGene00012132	157.137	-9.99109	1.2181	-8.20218	2.36e-16	1.65e-15	ifta-2
WBGene00011534	155.259	-9.97373	1.2181	-8.18795	2.66e-16	1.85e-15	T06E4.7
WBGene00007724	155.232	-9.97366	1.24989	-7.97961	1.47e-15	9.75e-15	C25F9.4
WBGene00017200	155.137	-9.97279	1.26517	-7.8826	3.21e-15	2.07e-14	F07C4.6
WBGene00013073	153.872	-9.96059	1.29778	-7.6751	1.65e-14	1.01e-13	hmit-1.1
WBGene00010760	153.236	-9.95466	1.4527	-6.85251	7.26e-12	3.6e-11	K10H10.4
WBGene00044732	152.551	-9.94832	1.22602	-8.1143	4.89e-16	3.35e-15	T03G11.10
WBGene00022682	150.231	-9.92626	1.242	-7.99215	1.33e-15	8.84e-15	ZK185.2
WBGene00019590	149.695	-9.92113	1.24812	-7.94883	1.88e-15	1.24e-14	K09F6.7
WBGene00015040	148.738	-9.91193	1.23854	-8.00294	1.21e-15	8.1e-15	cyp-34A5
WBGene00001553	146.022	-9.88532	1.22879	-8.04474	8.64e-16	5.84e-15	gcy-33
WBGene00022789	145.928	-9.88415	1.35003	-7.3214	2.45e-13	1.37e-12	lron-2
WBGene00021565	144.205	-9.86725	1.38224	-7.1386	9.43e-13	5.02e-12	Y45G12C.1
WBGene00020016	143.108	-9.85605	1.57673	-6.25094	4.08e-10	1.73e-09	lipl-3
WBGene00021511	143.057	-9.85562	1.23498	-7.9804	1.46e-15	9.69e-15	Y41D4B.1
WBGene00015853	141.543	-9.84031	1.25266	-7.85554	3.98e-15	2.55e-14	C16C8.16
WBGene00011113	140.753	-9.8321	1.22458	-8.02898	9.83e-16	6.61e-15	R07E5.5
WBGene00017625	140.373	-9.82818	1.2313	-7.98196	1.44e-15	9.58e-15	cgt-2
WBGene00009087	138.944	-9.81377	1.25519	-7.81856	5.34e-15	3.39e-14	F23D12.3
WBGene00017530	138.637	-9.81055	1.26356	-7.76422	8.21e-15	5.13e-14	F16H11.1
WBGene00006418	138.221	-9.80581	1.36571	-7.18001	6.97e-13	3.75e-12	spl-2
WBGene00021190	136.785	-9.79087	1.21967	-8.02746	9.95e-16	6.68e-15	Y14H12A.1
WBGene00013762	136.196	-9.78493	1.29	-7.58521	3.32e-14	1.98e-13	Y113G7B.12
WBGene00021337	134.888	-9.77096	1.51198	-6.46236	1.03e-10	4.61e-10	Y34F4.2
WBGene00016344	134.602	-9.76776	1.23115	-7.93385	2.12e-15	1.39e-14	rsef-1
WBGene00002248	134.466	-9.76603	1.29943	-7.51565	5.66e-14	3.32e-13	lam-3
WBGene00020080	133.373	-9.75469	1.24444	-7.83859	4.56e-15	2.91e-14	math-37
WBGene00002199	133.366	-9.75459	1.26742	-7.69644	1.4e-14	8.61e-14	kin-15
WBGene00017510	133.266	-9.75336	1.22564	-7.9578	1.75e-15	1.16e-14	nhr-178
WBGene00011236	131.903	-9.7387	1.23267	-7.90048	2.78e-15	1.8e-14	R11A8.1
WBGene00020385	131.611	-9.73539	1.23474	-7.8846	3.16e-15	2.04e-14	nhr-216
WBGene00219372	130.569	-9.72392	1.22221	-7.956	1.78e-15	1.17e-14	F01E11.17
WBGene00008874	129.629	-9.71357	1.22657	-7.91932	2.39e-15	1.56e-14	F15H10.7
WBGene00007140	129.467	-9.71135	1.29458	-7.50157	6.31e-14	3.68e-13	cyp-29A4
WBGene00022086	129.387	-9.71072	1.23965	-7.83342	4.75e-15	3.02e-14	sprr-3
WBGene00021195	129.055	-9.70686	1.24966	-7.76759	8e-15	5e-14	Y17G9A.2
WBGene00016368	128.039	-9.69549	1.22529	-7.91284	2.52e-15	1.64e-14	nhr-163
WBGene00017174	127.243	-9.68668	1.2646	-7.65986	1.86e-14	1.14e-13	tat-6
WBGene00020774	126.08	-9.67328	1.28514	-7.527	5.19e-14	3.06e-13	T24E12.5
WBGene00020972	125.79	-9.66999	1.25507	-7.70476	1.31e-14	8.07e-14	trpl-2
WBGene00009179	125.16	-9.66269	1.25764	-7.6832	1.55e-14	9.5e-14	kbp-3
WBGene00010998	125.094	-9.66217	1.23395	-7.83028	4.87e-15	3.1e-14	R03G8.3
WBGene00003554	124.158	-9.6511	1.27034	-7.59726	3.02e-14	1.81e-13	nas-38
WBGene00011675	121.906	-9.62488	1.24035	-7.75979	8.51e-15	5.31e-14	cyp-13A3
WBGene00016555	662.356	-9.61655	0.881244	-10.9125	1e-27	1.42e-26	math-20
WBGene00021256	121.176	-9.61623	1.27932	-7.51666	5.62e-14	3.29e-13	Y22D7AR.2
WBGene00022337	120.835	-9.61208	1.2464	-7.71189	1.24e-14	7.65e-14	pals-16
WBGene00006440	120.417	-9.60728	1.23377	-7.78693	6.87e-15	4.32e-14	tag-63
WBGene00016595	119.705	-9.59824	1.29227	-7.42744	1.11e-13	6.36e-13	C42D4.2
WBGene00007484	118.109	-9.57923	1.23758	-7.74029	9.92e-15	6.16e-14	C09G1.2
WBGene00044313	116.812	-9.56314	1.273	-7.51232	5.81e-14	3.4e-13	M02D8.7
WBGene00007723	113.286	-9.51906	1.28462	-7.41001	1.26e-13	7.22e-13	C25F9.2
WBGene00044759	111.061	-9.49056	1.25095	-7.58669	3.28e-14	1.96e-13	T06E6.15
WBGene00015333	110.667	-9.48515	1.23357	-7.6892	1.48e-14	9.08e-14	slc-17.3
WBGene00017937	110.343	-9.4808	1.49103	-6.35856	2.04e-10	8.84e-10	F30H5.3
WBGene00008693	109.744	-9.47314	1.22378	-7.74092	9.87e-15	6.13e-14	F11C1.4
WBGene00001541	593.71	-9.47203	0.880369	-10.7592	5.37e-27	7.26e-26	gcy-15
WBGene00009384	108.761	-9.45995	1.25481	-7.53893	4.74e-14	2.8e-13	piit-1
WBGene00020364	108.345	-9.45488	1.25573	-7.52941	5.1e-14	3e-13	T08E11.8
WBGene00002983	108.313	-9.45399	1.27069	-7.44007	1.01e-13	5.79e-13	lgx-1
WBGene00019660	108.211	-9.45271	1.45067	-6.5161	7.22e-11	3.27e-10	K11H12.4
WBGene00022142	107.881	-9.44862	1.27835	-7.39125	1.45e-13	8.27e-13	Y71G12B.2
WBGene00007788	107.886	-9.4486	1.26648	-7.4605	8.62e-14	4.99e-13	C28A5.1
WBGene00011601	107.172	-9.43908	1.23867	-7.62034	2.53e-14	1.53e-13	zim-3
WBGene00008199	388.338	-9.43347	1.06375	-8.86813	7.44e-19	6.17e-18	C49C3.9
WBGene00016544	106.724	-9.43307	1.26159	-7.47715	7.6e-14	4.41e-13	math-18
WBGene00015598	105.411	-9.41501	1.23425	-7.6281	2.38e-14	1.44e-13	fbxa-163
WBGene00009208	104.195	-9.3981	1.30323	-7.21139	5.54e-13	3e-12	F28C6.9
WBGene00013401	104.105	-9.39719	1.26101	-7.45211	9.19e-14	5.3e-13	Y62H9A.13
WBGene00235352	563.023	-9.38093	0.88564	-10.5923	3.24e-26	4.2e-25	ZK250.13
WBGene00023427	102.915	-9.38048	1.22713	-7.64426	2.1e-14	1.28e-13	F14D2.15
WBGene00018429	102.494	-9.3744	1.26024	-7.43856	1.02e-13	5.85e-13	F44E7.7
WBGene00020938	102.449	-9.37393	1.24852	-7.50803	6e-14	3.51e-13	clec-218
WBGene00008116	102.213	-9.37055	1.27719	-7.33687	2.19e-13	1.22e-12	exc-1
WBGene00044512	101.987	-9.36748	1.23489	-7.58565	3.31e-14	1.98e-13	W03F9.11
WBGene00004052	100.924	-9.35202	1.28965	-7.2516	4.12e-13	2.25e-12	parg-2
WBGene00019661	100.437	-9.34519	1.22854	-7.60673	2.81e-14	1.69e-13	K11H12.5
WBGene00019287	100.255	-9.34278	1.24263	-7.51856	5.54e-14	3.25e-13	K01A12.3
WBGene00020415	99.6523	-9.33389	1.28387	-7.27015	3.59e-13	1.97e-12	T10E9.5
WBGene00022487	99.6119	-9.33361	1.26962	-7.35152	1.96e-13	1.1e-12	fbxa-21
WBGene00011576	98.0055	-9.31026	1.26098	-7.38337	1.54e-13	8.75e-13	rmh-2
WBGene00016100	97.5267	-9.30283	1.24908	-7.44777	9.49e-14	5.47e-13	C25E10.11
WBGene00010497	526.352	-9.29863	0.890152	-10.4461	1.53e-25	1.89e-24	axl-1
WBGene00045405	97.0456	-9.29569	1.23316	-7.53813	4.77e-14	2.81e-13	D1086.18
WBGene00016660	96.7949	-9.29196	1.49555	-6.21308	5.2e-10	2.17e-09	C45B2.3
WBGene00008203	96.3817	-9.28612	1.24541	-7.45625	8.9e-14	5.14e-13	clec-198
WBGene00010658	95.2862	-9.26918	1.36149	-6.80813	9.89e-12	4.84e-11	K08D8.4
WBGene00003622	95.1076	-9.26694	1.25446	-7.38722	1.5e-13	8.51e-13	nhr-23
WBGene00021435	94.986	-9.26456	1.29871	-7.13368	9.77e-13	5.19e-12	Y39A3A.4
WBGene00007411	94.347	-9.25494	1.29646	-7.13863	9.43e-13	5.02e-12	C07C7.1
WBGene00019265	94.0251	-9.25021	1.24363	-7.43805	1.02e-13	5.87e-13	H35N09.1
WBGene00005758	93.7499	-9.24618	1.25176	-7.38655	1.51e-13	8.55e-13	srw-11
WBGene00017243	93.7163	-9.24571	1.31916	-7.00881	2.4e-12	1.24e-11	F08C6.5
WBGene00005205	92.7879	-9.23125	1.24344	-7.42395	1.14e-13	6.52e-13	srg-48
WBGene00015041	92.7105	-9.23013	1.38572	-6.66088	2.72e-11	1.28e-10	cyp-34A6
WBGene00019699	92.5933	-9.22801	1.2352	-7.47087	7.97e-14	4.62e-13	math-34
WBGene00020976	91.6376	-9.21274	1.35681	-6.78998	1.12e-11	5.47e-11	oac-51
WBGene00009709	91.2973	-9.2076	1.23204	-7.47345	7.81e-14	4.53e-13	fbxa-144
WBGene00016700	91.005	-9.20273	1.31867	-6.97878	2.98e-12	1.52e-11	C46A5.4
WBGene00018939	90.9199	-9.20182	1.26103	-7.29704	2.94e-13	1.63e-12	fbxa-190
WBGene00006687	90.6824	-9.19789	1.24488	-7.38858	1.48e-13	8.43e-13	twk-35
WBGene00007717	90.2795	-9.19137	1.31855	-6.97082	3.15e-12	1.61e-11	C25D7.5
WBGene00011296	88.8251	-9.16787	1.26861	-7.22673	4.95e-13	2.69e-12	glb-21
WBGene00005271	88.7532	-9.16706	1.33537	-6.86481	6.66e-12	3.31e-11	srh-48
WBGene00018354	88.5767	-9.16433	1.27859	-7.16753	7.64e-13	4.09e-12	F42G2.5
WBGene00003729	88.2229	-9.1585	1.36611	-6.70407	2.03e-11	9.65e-11	nhx-1
WBGene00011494	87.8845	-9.15254	1.43232	-6.39	1.66e-10	7.27e-10	T05F1.9
WBGene00004155	87.8604	-9.15204	1.45627	-6.28459	3.29e-10	1.4e-09	pqn-73
WBGene00010506	87.2761	-9.14248	1.23758	-7.38737	1.5e-13	8.5e-13	K02E2.1
WBGene00007467	87.1318	-9.14057	1.25252	-7.29773	2.93e-13	1.62e-12	chil-3
WBGene00016282	87.0921	-9.13941	1.24478	-7.34221	2.1e-13	1.18e-12	C31B8.7
WBGene00016947	86.9382	-9.13736	1.27	-7.19479	6.26e-13	3.38e-12	C55B7.11
WBGene00015586	86.9003	-9.13622	1.24212	-7.35533	1.9e-13	1.07e-12	lido-1
WBGene00017092	86.6339	-9.13186	1.37302	-6.65093	2.91e-11	1.37e-10	E02C12.6
WBGene00009485	86.6216	-9.13171	1.40408	-6.5037	7.84e-11	3.54e-10	F36G9.3
WBGene00015599	86.5879	-9.13157	1.29631	-7.04429	1.86e-12	9.68e-12	fbxa-164
WBGene00119204	86.0937	-9.12282	1.25486	-7.26999	3.6e-13	1.98e-12	ZC116.5
WBGene00007344	85.8208	-9.11811	1.36834	-6.66361	2.67e-11	1.26e-10	C05E7.2
WBGene00000902	85.5551	-9.11364	1.31149	-6.94909	3.68e-12	1.86e-11	daf-6
WBGene00011207	465.301	-9.10727	0.876176	-10.3943	2.63e-25	3.22e-24	R10E8.1
WBGene00013207	85.0158	-9.10496	1.80296	-5.04999	4.42e-07	1.4e-06	zipt-2.3
WBGene00018157	84.2572	-9.09205	1.29007	-7.04773	1.82e-12	9.46e-12	lron-6
WBGene00013844	84.1678	-9.09004	1.31443	-6.91559	4.66e-12	2.34e-11	fbxa-50
WBGene00017233	464.123	-9.08774	0.959572	-9.47063	2.78e-21	2.67e-20	lmd-4
WBGene00012760	83.4806	-9.07838	1.23548	-7.34804	2.01e-13	1.13e-12	Y41C4A.17
WBGene00001550	83.3536	-9.07637	1.25232	-7.24764	4.24e-13	2.32e-12	gcy-27
WBGene00011249	83.002	-9.07019	1.23196	-7.36242	1.81e-13	1.02e-12	R11G10.2
WBGene00015258	82.9258	-9.06879	1.25981	-7.19854	6.09e-13	3.29e-12	B0554.5
WBGene00014666	455.69	-9.06697	0.928249	-9.76782	1.55e-22	1.6e-21	C05D12.3
WBGene00017091	82.722	-9.06568	1.2736	-7.11814	1.09e-12	5.79e-12	ttr-40
WBGene00008014	82.6973	-9.06516	1.24328	-7.29133	3.07e-13	1.7e-12	fbxa-172
WBGene00045457	82.5496	-9.06202	1.37459	-6.59251	4.32e-11	2e-10	F33H12.7
WBGene00013850	82.4446	-9.06063	1.23954	-7.30969	2.68e-13	1.49e-12	ZC84.7
WBGene00014135	82.2051	-9.05641	1.27954	-7.07789	1.46e-12	7.67e-12	ZK896.4
WBGene00017048	444.692	-9.05602	0.904597	-10.0111	1.36e-23	1.5e-22	D2021.4
WBGene00014195	81.8082	-9.04928	1.41886	-6.37788	1.8e-10	7.84e-10	srz-10
WBGene00012604	79.6147	-9.00994	1.67409	-5.38199	7.37e-08	2.52e-07	nspe-2
WBGene00012428	79.4741	-9.0076	1.45513	-6.19024	6.01e-10	2.51e-09	Y11D7A.3
WBGene00006897	78.9047	-8.99728	1.36103	-6.61067	3.83e-11	1.78e-10	ver-4
WBGene00000477	703.616	-8.98998	0.772524	-11.6371	2.67e-31	4.66e-30	cft-1
WBGene00015395	78.5058	-8.98974	1.23741	-7.26494	3.73e-13	2.05e-12	nhr-147
WBGene00018626	78.4543	-8.98895	1.23348	-7.2875	3.16e-13	1.75e-12	F49D11.2
WBGene00007322	78.0442	-8.9815	1.26576	-7.09574	1.29e-12	6.77e-12	C05B5.5
WBGene00005759	77.8721	-8.97843	1.24793	-7.19465	6.26e-13	3.38e-12	srw-12
WBGene00009431	77.8264	-8.97733	1.33807	-6.70919	1.96e-11	9.34e-11	dct-17
WBGene00009403	280.425	-8.97423	1.06586	-8.4197	3.77e-17	2.8e-16	F35C11.4
WBGene00007988	77.3913	-8.96927	1.23427	-7.26688	3.68e-13	2.02e-12	best-8
WBGene00000990	77.1711	-8.96535	1.24157	-7.22097	5.16e-13	2.8e-12	dhs-27
WBGene00008169	77.0825	-8.96368	1.26294	-7.09747	1.27e-12	6.69e-12	C48B4.6
WBGene00011762	77.0661	-8.96307	1.27078	-7.05323	1.75e-12	9.11e-12	T13H10.2
WBGene00019472	76.9079	-8.96055	1.3749	-6.51721	7.16e-11	3.25e-10	cyp-35B1
WBGene00019105	76.5154	-8.95278	1.27581	-7.01733	2.26e-12	1.17e-11	asp-8
WBGene00020474	76.4375	-8.95165	1.55448	-5.75862	8.48e-09	3.2e-08	lips-13
WBGene00019426	76.3778	-8.94999	1.294	-6.91653	4.63e-12	2.33e-11	cutl-16
WBGene00016236	76.2225	-8.94751	1.24025	-7.21426	5.42e-13	2.94e-12	heri-1
WBGene00018136	274.49	-8.94473	1.10755	-8.07613	6.69e-16	4.54e-15	F37A4.6
WBGene00016697	75.2837	-8.92973	1.46196	-6.10803	1.01e-09	4.13e-09	cyp-33C2
WBGene00003731	412.497	-8.92874	0.898513	-9.93724	2.87e-23	3.1e-22	nhx-3
WBGene00018924	74.5201	-8.9146	1.25825	-7.0849	1.39e-12	7.3e-12	F56A11.4
WBGene00000412	73.5183	-8.89503	1.31558	-6.76128	1.37e-11	6.61e-11	cdr-1
WBGene00016669	73.1451	-8.88815	1.54104	-5.76763	8.04e-09	3.04e-08	ilys-2
WBGene00016274	73.0484	-8.8858	1.23945	-7.16914	7.55e-13	4.04e-12	C30G12.2
WBGene00014699	72.9982	-8.88484	1.5304	-5.80558	6.41e-09	2.45e-08	C37A5.5
WBGene00044510	72.7531	-8.88009	1.24563	-7.12901	1.01e-12	5.36e-12	K07H8.11
WBGene00006005	72.6313	-8.87804	1.28831	-6.89122	5.53e-12	2.76e-11	srx-114
WBGene00000866	72.4552	-8.87411	1.23901	-7.16228	7.93e-13	4.25e-12	cyb-2.1
WBGene00044349	72.204	-8.86943	1.27501	-6.95637	3.49e-12	1.77e-11	Y71G12B.32
WBGene00016717	389.667	-8.86739	0.938322	-9.45026	3.38e-21	3.22e-20	math-22
WBGene00016733	71.9685	-8.86419	1.53781	-5.76417	8.21e-09	3.1e-08	phat-2
WBGene00012616	71.5372	-8.85577	1.26426	-7.00472	2.47e-12	1.27e-11	dct-14
WBGene00016935	656.073	-8.84506	0.762955	-11.5932	4.46e-31	7.66e-30	ifta-1
WBGene00045339	70.966	-8.84404	1.2494	-7.07863	1.46e-12	7.63e-12	T10H4.13
WBGene00014152	70.9132	-8.84314	1.2381	-7.14253	9.16e-13	4.88e-12	ZK930.2
WBGene00005653	70.8485	-8.84206	1.24983	-7.07461	1.5e-12	7.84e-12	srr-2
WBGene00010528	70.4403	-8.83375	1.29418	-6.82574	8.75e-12	4.3e-11	K03D3.2
WBGene00009807	70.4177	-8.83341	1.31087	-6.7386	1.6e-11	7.67e-11	pepm-1
WBGene00000907	376.211	-8.81403	0.899506	-9.79875	1.14e-22	1.19e-21	daf-11
WBGene00018432	69.2101	-8.80818	1.30564	-6.74625	1.52e-11	7.3e-11	irld-33
WBGene00019149	68.9441	-8.80254	1.24369	-7.07778	1.46e-12	7.67e-12	H03E18.2
WBGene00044574	68.3689	-8.79055	1.27467	-6.89632	5.34e-12	2.67e-11	F23G4.1
WBGene00017529	67.9847	-8.78266	1.27558	-6.88521	5.77e-12	2.88e-11	F16G10.15
WBGene00013555	67.9187	-8.7811	1.24537	-7.05099	1.78e-12	9.25e-12	fbxa-89
WBGene00010637	67.167	-8.76503	1.29395	-6.77386	1.25e-11	6.08e-11	K07F5.12
WBGene00019140	67.1242	-8.76424	1.25847	-6.96417	3.3e-12	1.68e-11	bath-3
WBGene00014864	66.9733	-8.76066	1.26144	-6.94495	3.79e-12	1.92e-11	Y18D10A.22
WBGene00045401	66.6379	-8.75371	1.2512	-6.99626	2.63e-12	1.35e-11	eol-1
WBGene00019230	364.401	-8.74782	0.906389	-9.65129	4.85e-22	4.88e-21	ttll-11
WBGene00008365	66.3732	-8.74767	1.2413	-7.04721	1.83e-12	9.49e-12	D1046.4
WBGene00017945	243.552	-8.74417	1.1587	-7.54655	4.47e-14	2.65e-13	F31D5.2
WBGene00012413	65.9929	-8.73953	1.24638	-7.01191	2.35e-12	1.21e-11	Y7A5A.7
WBGene00016110	65.7966	-8.73499	1.24234	-7.03111	2.05e-12	1.06e-11	npr-11
WBGene00016386	65.604	-8.73093	1.25739	-6.94369	3.82e-12	1.93e-11	tag-272
WBGene00015113	65.6106	-8.73088	1.27824	-6.83038	8.47e-12	4.17e-11	B0281.6
WBGene00011133	65.3219	-8.725	1.26327	-6.90667	4.96e-12	2.49e-11	R08A2.2
WBGene00008491	65.2839	-8.72367	1.25771	-6.93614	4.03e-12	2.04e-11	bgnt-1.1
WBGene00020747	65.0547	-8.71846	1.26481	-6.89312	5.46e-12	2.73e-11	T24A6.7
WBGene00008598	64.8005	-8.71321	1.26156	-6.90667	4.96e-12	2.49e-11	spin-3
WBGene00001532	233.88	-8.71291	1.10367	-7.89448	2.92e-15	1.89e-14	gcy-5
WBGene00008967	64.7554	-8.71183	1.38008	-6.31256	2.74e-10	1.18e-09	F20B10.3
WBGene00018727	64.4807	-8.70598	1.25333	-6.94626	3.75e-12	1.9e-11	jbts-14
WBGene00010752	64.4516	-8.70522	1.31341	-6.62794	3.4e-11	1.59e-10	K10G4.3
WBGene00018684	63.9776	-8.69474	1.29449	-6.71672	1.86e-11	8.88e-11	fbxa-41
WBGene00012432	354.335	-8.69451	0.975742	-8.91067	5.07e-19	4.25e-18	Y11D7A.8
WBGene00012492	63.8885	-8.6929	1.25304	-6.93743	3.99e-12	2.02e-11	fbxb-7
WBGene00010832	63.5643	-8.68499	1.44513	-6.00982	1.86e-09	7.45e-09	M02G9.3
WBGene00020266	63.4172	-8.68207	1.24453	-6.9762	3.03e-12	1.55e-11	T05H4.3
WBGene00007669	63.3814	-8.68149	1.26986	-6.83658	8.11e-12	4e-11	C18D1.2
WBGene00005718	63.3682	-8.68074	1.24589	-6.96749	3.23e-12	1.64e-11	srv-7
WBGene00003231	62.9618	-8.67119	1.42657	-6.07833	1.21e-09	4.94e-09	mex-6
WBGene00022061	62.8942	-8.66998	1.24235	-6.97868	2.98e-12	1.52e-11	Y67D8B.1
WBGene00003938	62.5403	-8.66215	1.27172	-6.81138	9.67e-12	4.74e-11	pax-2
WBGene00011462	62.5188	-8.66142	1.24909	-6.93419	4.09e-12	2.06e-11	vap-2
WBGene00009625	62.3498	-8.65742	1.25564	-6.89483	5.39e-12	2.7e-11	F41E7.9
WBGene00006008	62.2704	-8.65563	1.40472	-6.16182	7.19e-10	2.98e-09	srx-117
WBGene00016233	61.478	-8.63716	1.30938	-6.59637	4.21e-11	1.95e-10	srt-58
WBGene00009490	61.3093	-8.63328	1.25406	-6.88429	5.81e-12	2.9e-11	fbxa-99
WBGene00013088	61.1311	-8.62887	1.34177	-6.43094	1.27e-10	5.62e-10	Y51B9A.6
WBGene00009808	61.0833	-8.62813	1.25285	-6.88679	5.71e-12	2.85e-11	srm-4
WBGene00005070	60.9908	-8.62587	1.24919	-6.90519	5.01e-12	2.51e-11	srb-5
WBGene00020522	60.9291	-8.62439	1.32361	-6.51581	7.23e-11	3.28e-10	T15B7.10
WBGene00021085	60.808	-8.62105	1.55164	-5.55608	2.76e-08	9.88e-08	W08E12.4
WBGene00015042	60.5107	-8.61449	1.31104	-6.57072	5.01e-11	2.3e-10	cyp-34A7
WBGene00020075	877.463	-8.61054	0.624633	-13.785	3.14e-43	1.06e-41	math-35
WBGene00007808	325.212	-8.60661	0.923193	-9.32266	1.13e-20	1.05e-19	best-7
WBGene00006655	432.304	-8.6006	0.781499	-11.0053	3.6e-28	5.25e-27	tub-1
WBGene00021490	59.7652	-8.59647	1.25519	-6.84876	7.45e-12	3.69e-11	Y40B10A.5
WBGene00009986	59.6385	-8.59318	1.25125	-6.86766	6.53e-12	3.25e-11	F53F4.2
WBGene00017001	59.2254	-8.58344	1.24654	-6.88581	5.75e-12	2.87e-11	D1007.3
WBGene00018515	59.2021	-8.58245	1.27272	-6.74339	1.55e-11	7.44e-11	F46G11.2
WBGene00015309	59.1692	-8.58175	1.4197	-6.04478	1.5e-09	6.05e-09	C01G5.7
WBGene00012257	59.1128	-8.58023	1.59787	-5.36979	7.88e-08	2.69e-07	lpr-4
WBGene00015963	58.9876	-8.57743	1.26394	-6.78624	1.15e-11	5.6e-11	C18B10.6
WBGene00009095	58.8997	-8.57547	1.26947	-6.75517	1.43e-11	6.88e-11	F23H12.7
WBGene00016324	318.905	-8.5745	0.877736	-9.76888	1.53e-22	1.58e-21	C32E8.6
WBGene00009904	58.8139	-8.57354	1.27818	-6.70762	1.98e-11	9.43e-11	F49E12.12
WBGene00010512	58.7792	-8.57244	1.29456	-6.62192	3.55e-11	1.65e-10	K02E11.3
WBGene00012669	58.6549	-8.56929	1.25232	-6.84272	7.77e-12	3.84e-11	Y39B6A.7
WBGene00013398	58.6454	-8.56869	1.38593	-6.18261	6.31e-10	2.62e-09	Y62H9A.10
WBGene00016303	58.4832	-8.56494	1.25526	-6.82321	8.9e-12	4.38e-11	fbxc-32
WBGene00005903	58.0405	-8.55396	1.37448	-6.22343	4.86e-10	2.04e-09	srx-12
WBGene00020825	113.202	-8.55192	1.24119	-6.8901	5.58e-12	2.78e-11	tmem-231
WBGene00017263	57.7421	-8.54644	1.60651	-5.31987	1.04e-07	3.5e-07	F08F3.6
WBGene00011493	57.6497	-8.54456	1.25007	-6.83529	8.18e-12	4.03e-11	T05F1.8
WBGene00007542	57.631	-8.54398	1.48607	-5.74937	8.96e-09	3.37e-08	C12D8.15
WBGene00044135	57.608	-8.54319	1.25826	-6.78968	1.12e-11	5.48e-11	F08G12.11
WBGene00013166	57.4823	-8.54016	1.35291	-6.31244	2.75e-10	1.18e-09	Y53F4B.20
WBGene00021972	57.4831	-8.53996	1.26718	-6.73936	1.59e-11	7.64e-11	glb-31
WBGene00019367	57.42	-8.53823	1.29274	-6.60475	3.98e-11	1.84e-10	K03H6.1
WBGene00016596	1278.73	-8.53605	1.9188	-4.44863	8.64e-06	2.36e-05	C42D4.3
WBGene00007327	57.3055	-8.536	1.27494	-6.69522	2.15e-11	1.02e-10	C05C9.3
WBGene00022606	57.1948	-8.53326	1.27901	-6.67178	2.53e-11	1.19e-10	dmsr-9
WBGene00018100	2052.55	-8.53113	0.696013	-12.2571	1.54e-34	3.25e-33	math-26
WBGene00019579	57.0685	-8.53009	1.26221	-6.75804	1.4e-11	6.76e-11	oac-57
WBGene00017879	56.9218	-8.52617	1.25677	-6.78419	1.17e-11	5.68e-11	acd-4
WBGene00014160	56.8587	-8.52473	1.25551	-6.78987	1.12e-11	5.47e-11	ZK938.3
WBGene00000442	56.8396	-8.52389	1.25666	-6.78299	1.18e-11	5.72e-11	ceh-19
WBGene00018103	56.678	-8.52015	1.354	-6.29257	3.12e-10	1.33e-09	F36H5.4
WBGene00005638	56.5513	-8.51675	1.25425	-6.79031	1.12e-11	5.46e-11	srm-1
WBGene00021084	56.4724	-8.51436	1.57407	-5.40913	6.33e-08	2.18e-07	W08E12.3
WBGene00010705	56.3377	-8.51162	1.38631	-6.13975	8.27e-10	3.41e-09	cyp-14A1
WBGene00044712	56.0503	-8.50383	1.44204	-5.89709	3.7e-09	1.44e-08	F22G12.8
WBGene00021987	56.0122	-8.50294	1.30174	-6.53199	6.49e-11	2.96e-10	fbxa-40
WBGene00020157	55.9282	-8.5006	1.25061	-6.79718	1.07e-11	5.21e-11	T02B11.6
WBGene00044659	55.8463	-8.49894	1.42651	-5.95787	2.56e-09	1.01e-08	fbxa-142
WBGene00009967	55.8416	-8.49818	1.25667	-6.76246	1.36e-11	6.56e-11	F53B7.4
WBGene00194687	55.7857	-8.49733	1.27975	-6.63982	3.14e-11	1.47e-10	F57C12.6
WBGene00019318	55.7208	-8.4949	1.45595	-5.83461	5.39e-09	2.08e-08	K02E10.4
WBGene00018412	55.6653	-8.49369	1.54543	-5.49602	3.88e-08	1.37e-07	nhr-37
WBGene00022331	55.5989	-8.49228	1.2849	-6.60929	3.86e-11	1.79e-10	fbxa-19
WBGene00009859	55.0503	-8.47779	1.34064	-6.3237	2.55e-10	1.1e-09	clec-33
WBGene00010749	54.9678	-8.47581	1.25357	-6.76133	1.37e-11	6.61e-11	K10D11.5
WBGene00016467	54.9049	-8.47443	1.49774	-5.65816	1.53e-08	5.63e-08	C36B7.4
WBGene00010243	54.8473	-8.47275	1.26152	-6.71632	1.86e-11	8.9e-11	F58D5.3
WBGene00011566	54.3433	-8.45888	1.31078	-6.45334	1.09e-10	4.88e-10	nhr-214
WBGene00008028	54.1602	-8.45387	1.31944	-6.40715	1.48e-10	6.53e-10	scl-6
WBGene00013905	302.415	-8.4488	1.07583	-7.85326	4.05e-15	2.6e-14	ugt-4
WBGene00013822	53.8241	-8.44515	1.25931	-6.70615	2e-11	9.52e-11	Y116F11B.6
WBGene00013246	53.7734	-8.44427	1.30585	-6.46651	1e-10	4.49e-10	Y57A10A.1
WBGene00006208	53.194	-8.42815	1.31674	-6.40076	1.55e-10	6.8e-10	str-163
WBGene00015608	1859.7	-8.42528	0.671393	-12.5489	4.03e-36	9.15e-35	math-3
WBGene00050974	52.8367	-8.41871	1.34953	-6.23826	4.42e-10	1.87e-09	Y6G8.9
WBGene00008731	285.341	-8.41575	0.9227	-9.12078	7.46e-20	6.61e-19	F13B12.3
WBGene00018665	52.6649	-8.41422	1.26703	-6.64088	3.12e-11	1.46e-10	bath-4
WBGene00005246	52.6038	-8.41248	1.28026	-6.57094	5e-11	2.3e-10	srh-21
WBGene00019148	52.532	-8.40985	1.45973	-5.76123	8.35e-09	3.15e-08	H03E18.1
WBGene00000053	52.4951	-8.40927	1.26636	-6.64052	3.13e-11	1.46e-10	acr-14
WBGene00016328	282.95	-8.4011	0.886464	-9.47709	2.61e-21	2.51e-20	pde-5
WBGene00017807	52.0798	-8.39753	1.26306	-6.64856	2.96e-11	1.39e-10	F26A1.9
WBGene00195084	51.9399	-8.39414	1.27669	-6.5749	4.87e-11	2.24e-10	C43C3.4
WBGene00011443	51.7971	-8.38964	1.30269	-6.44023	1.19e-10	5.3e-10	cutl-11
WBGene00022591	51.6739	-8.38614	1.32816	-6.31411	2.72e-10	1.17e-09	cuti-1
WBGene00011671	51.6274	-8.38518	1.47753	-5.67514	1.39e-08	5.12e-08	cyp-13A4
WBGene00000033	51.4395	-8.37974	1.55834	-5.37735	7.56e-08	2.58e-07	abu-10
WBGene00016757	462.745	-8.37887	0.735943	-11.3852	4.95e-30	8e-29	C49A9.3
WBGene00019106	51.3485	-8.37727	1.27096	-6.5913	4.36e-11	2.02e-10	irld-38
WBGene00017100	51.2937	-8.37578	1.26763	-6.60745	3.91e-11	1.81e-10	E02H9.2
WBGene00012588	51.1455	-8.37138	1.6538	-5.0619	4.15e-07	1.31e-06	lips-16
WBGene00022257	50.9821	-8.36663	1.32312	-6.32339	2.56e-10	1.1e-09	puf-11
WBGene00077691	50.7086	-8.35897	1.45491	-5.74537	9.17e-09	3.44e-08	T06E4.14
WBGene00008808	50.4747	-8.35272	1.27282	-6.56236	5.3e-11	2.43e-10	ntr-2
WBGene00012747	50.2856	-8.34718	1.25729	-6.63905	3.16e-11	1.48e-10	Y40H7A.10
WBGene00002067	2639.21	-8.34103	0.440299	-18.944	4.95e-80	1.21e-77	ifp-1
WBGene00016711	50.0472	-8.34011	1.27364	-6.54826	5.82e-11	2.66e-10	fbxc-53
WBGene00271715	50.007	-8.33949	1.33293	-6.2565	3.94e-10	1.67e-09	B0244.17
WBGene00020046	50.0121	-8.33932	1.26962	-6.56837	5.09e-11	2.34e-10	best-16
WBGene00001059	1753.47	-8.33623	0.745356	-11.1842	4.87e-29	7.41e-28	dpf-6
WBGene00019103	49.8108	-8.33334	1.28098	-6.50544	7.75e-11	3.5e-10	F59D6.1
WBGene00009573	49.7206	-8.33056	1.57133	-5.30159	1.15e-07	3.85e-07	F40E10.5
WBGene00012708	49.626	-8.3278	1.30756	-6.36897	1.9e-10	8.28e-10	sre-19
WBGene00011492	49.4174	-8.32205	1.25581	-6.62685	3.43e-11	1.6e-10	T05F1.7
WBGene00021111	49.2173	-8.31633	1.2548	-6.62763	3.41e-11	1.59e-10	W09C3.3
WBGene00020010	49.0716	-8.31209	1.28764	-6.45528	1.08e-10	4.82e-10	R11G1.1
WBGene00015081	49.0161	-8.31062	1.27169	-6.53509	6.36e-11	2.9e-10	B0244.6
WBGene00022504	49.0271	-8.31021	1.31002	-6.34359	2.24e-10	9.71e-10	mam-1
WBGene00011140	48.8706	-8.30628	1.2683	-6.54915	5.79e-11	2.64e-10	R08B4.4
WBGene00015465	48.8386	-8.30541	1.29278	-6.42447	1.32e-10	5.85e-10	C05C8.8
WBGene00013607	48.7888	-8.30357	1.28395	-6.46721	9.98e-11	4.47e-10	clec-27
WBGene00007857	1149.05	-8.2996	0.474637	-17.4862	1.83e-68	2.18e-66	C31H5.6
WBGene00011354	48.5652	-8.29716	1.2619	-6.57514	4.86e-11	2.24e-10	lgc-13
WBGene00013147	48.5789	-8.29712	1.26961	-6.53515	6.35e-11	2.9e-10	eyg-1
WBGene00016755	48.5271	-8.29596	1.28858	-6.43806	1.21e-10	5.37e-10	C49A9.1
WBGene00045297	48.4884	-8.29517	1.28923	-6.43419	1.24e-10	5.51e-10	fbxc-43
WBGene00006103	48.4874	-8.29511	1.29729	-6.39416	1.61e-10	7.08e-10	str-38
WBGene00000893	48.3438	-8.28998	1.45412	-5.70102	1.19e-08	4.42e-08	cyn-17
WBGene00022413	3154.42	-8.28889	0.550775	-15.0495	3.48e-51	1.78e-49	Y102A11A.3
WBGene00044990	48.2234	-8.28661	1.28356	-6.45597	1.08e-10	4.8e-10	T25B9.11
WBGene00010589	48.201	-8.28631	1.38827	-5.96878	2.39e-09	9.49e-09	cyp-33D1
WBGene00012823	48.1314	-8.28423	1.29832	-6.38073	1.76e-10	7.7e-10	Y43F8B.13
WBGene00012781	47.9766	-8.27912	1.29227	-6.40665	1.49e-10	6.55e-10	nspd-7
WBGene00007963	47.8356	-8.27546	1.31401	-6.29788	3.02e-10	1.29e-09	cyp-25A1
WBGene00000493	47.7307	-8.272	1.26211	-6.55412	5.6e-11	2.56e-10	che-14
WBGene00008810	255.228	-8.27028	1.11032	-7.44857	9.44e-14	5.44e-13	cyp-13A12
WBGene00006665	47.3006	-8.25935	1.28876	-6.40876	1.47e-10	6.46e-10	twk-10
WBGene00008825	47.3093	-8.25883	1.65089	-5.00265	5.65e-07	1.77e-06	F14H3.6
WBGene00015229	47.2205	-8.25691	1.34892	-6.12113	9.29e-10	3.82e-09	fbxa-125
WBGene00010189	47.1575	-8.25456	1.25914	-6.55571	5.54e-11	2.54e-10	F57B1.6
WBGene00008240	47.102	-8.2528	1.25787	-6.56092	5.35e-11	2.45e-10	C50H2.4
WBGene00001388	47.0207	-8.25038	1.54183	-5.35103	8.75e-08	2.98e-07	far-4
WBGene00003008	46.8102	-8.24416	1.28466	-6.41737	1.39e-10	6.12e-10	lin-22
WBGene00007431	253.266	-8.24141	0.881771	-9.34643	9.07e-21	8.42e-20	C08B6.11
WBGene00010144	46.6392	-8.23833	1.27848	-6.44383	1.16e-10	5.18e-10	F56C4.1
WBGene00016152	46.4681	-8.23367	1.70731	-4.82261	1.42e-06	4.26e-06	pho-12
WBGene00016520	46.4183	-8.23142	1.3118	-6.27491	3.5e-10	1.49e-09	C39B5.2
WBGene00012431	46.3917	-8.23101	1.29764	-6.34306	2.25e-10	9.74e-10	Y11D7A.7
WBGene00000461	46.0956	-8.22137	1.27903	-6.42784	1.29e-10	5.73e-10	ceh-40
WBGene00015966	2540.89	-8.21647	0.510405	-16.0979	2.64e-58	1.92e-56	C18C4.7
WBGene00018113	45.7109	-8.20979	1.28727	-6.37765	1.8e-10	7.85e-10	F36H9.5
WBGene00015902	45.6542	-8.2075	1.50624	-5.449	5.07e-08	1.76e-07	nhr-159
WBGene00013907	45.5876	-8.20573	1.2633	-6.49549	8.28e-11	3.74e-10	sre-20
WBGene00017450	45.447	-8.2012	1.2711	-6.45204	1.1e-10	4.92e-10	bath-27
WBGene00008084	45.4055	-8.20028	1.33391	-6.14755	7.87e-10	3.25e-09	C44C10.3
WBGene00011361	422.817	-8.19794	0.81635	-10.0422	9.95e-24	1.1e-22	lyst-1
WBGene00000069	421.69	-8.19602	0.806727	-10.1596	3e-24	3.44e-23	acy-2
WBGene00011009	45.2738	-8.19564	1.38342	-5.92417	3.14e-09	1.23e-08	cyp-14A4
WBGene00044020	45.0981	-8.18988	1.30259	-6.28739	3.23e-10	1.38e-09	ZK856.14
WBGene00008463	45.0721	-8.18948	1.26687	-6.46437	1.02e-10	4.55e-10	E02H4.5
WBGene00011107	45.0762	-8.189	1.51403	-5.40874	6.35e-08	2.19e-07	R07E3.6
WBGene00045195	45.0498	-8.18879	1.26894	-6.45325	1.09e-10	4.88e-10	F53F4.17
WBGene00012265	44.9905	-8.18662	1.27376	-6.42713	1.3e-10	5.76e-10	W04G5.4
WBGene00011822	44.9323	-8.18483	1.28993	-6.34519	2.22e-10	9.62e-10	T18D3.5
WBGene00006016	44.8328	-8.18154	1.33311	-6.13719	8.4e-10	3.46e-09	srx-125
WBGene00013875	242.332	-8.17791	0.901468	-9.07177	1.17e-19	1.02e-18	ZC376.3
WBGene00016925	44.4827	-8.17038	1.44407	-5.65786	1.53e-08	5.64e-08	srb-18
WBGene00022572	44.4476	-8.16972	1.40069	-5.83264	5.46e-09	2.1e-08	ZC239.14
WBGene00017462	44.3026	-8.16473	1.27853	-6.38601	1.7e-10	7.46e-10	F14D2.14
WBGene00050967	44.1978	-8.16155	1.30535	-6.25237	4.04e-10	1.71e-09	C25F9.15
WBGene00018411	44.1808	-8.16044	1.2618	-6.46731	9.98e-11	4.47e-10	F44B9.10
WBGene00012027	44.1666	-8.16028	1.3156	-6.20271	5.55e-10	2.32e-09	fbxa-127
WBGene00015505	44.1454	-8.15954	1.28769	-6.33655	2.35e-10	1.01e-09	C06A5.8
WBGene00018101	1436.03	-8.1576	1.98813	-4.10316	4.08e-05	0.000102951	math-27
WBGene00007508	44.0753	-8.15723	1.33946	-6.08994	1.13e-09	4.6e-09	C10C5.4
WBGene00020277	44.0647	-8.15622	1.32617	-6.15021	7.74e-10	3.2e-09	T06A1.1
WBGene00012269	44.0352	-8.15606	1.46794	-5.55614	2.76e-08	9.87e-08	W04G5.9
WBGene00013247	43.9954	-8.15483	1.28012	-6.37036	1.89e-10	8.21e-10	Y57A10A.2
WBGene00255600	238.046	-8.15421	0.909988	-8.96079	3.22e-19	2.73e-18	F54H5.14
WBGene00001730	917.935	-8.15206	0.900981	-9.04798	1.46e-19	1.26e-18	grl-21
WBGene00010357	1092.26	-8.14976	0.594096	-13.7179	7.93e-43	2.61e-41	H03A11.2
WBGene00018617	43.7589	-8.14696	1.29784	-6.27734	3.44e-10	1.46e-09	srt-17
WBGene00018173	43.703	-8.14475	1.2656	-6.43546	1.23e-10	5.46e-10	F38B6.3
WBGene00017806	43.671	-8.14355	1.30737	-6.22894	4.7e-10	1.97e-09	F26A1.8
WBGene00018707	43.5204	-8.13861	1.34337	-6.05836	1.38e-09	5.57e-09	oac-31
WBGene00008869	43.4733	-8.13731	1.30196	-6.25007	4.1e-10	1.73e-09	F15G9.6
WBGene00015376	43.3306	-8.13229	1.29831	-6.26375	3.76e-10	1.59e-09	C03B1.5
WBGene00007057	43.3104	-8.1322	1.54468	-5.26464	1.4e-07	4.67e-07	ant-1.2
WBGene00017615	43.2842	-8.13055	1.28206	-6.34181	2.27e-10	9.82e-10	srsx-32
WBGene00044469	158.062	-8.12952	1.08638	-7.48313	7.26e-14	4.22e-13	clec-173
WBGene00013439	233.862	-8.12722	0.91371	-8.89475	5.86e-19	4.88e-18	Y66D12A.13
WBGene00007692	233.065	-8.12637	0.942687	-8.62043	6.67e-18	5.23e-17	C23H4.3
WBGene00009810	43.0941	-8.12429	1.27276	-6.38319	1.73e-10	7.58e-10	srm-6
WBGene00005975	42.9676	-8.12061	1.26972	-6.39559	1.6e-10	7.02e-10	srx-84
WBGene00010186	42.8218	-8.11514	1.28197	-6.33022	2.45e-10	1.06e-09	nhr-283
WBGene00010948	42.5013	-8.1041	1.37716	-5.88466	3.99e-09	1.55e-08	M195.2
WBGene00206361	42.288	-8.09733	1.27309	-6.36038	2.01e-10	8.74e-10	K02G10.15
WBGene00007172	42.094	-8.09072	1.27246	-6.35831	2.04e-10	8.85e-10	B0393.7
WBGene00003714	42.0329	-8.08832	1.28539	-6.29249	3.12e-10	1.33e-09	nhr-124
WBGene00005616	41.9898	-8.08753	1.31031	-6.17224	6.73e-10	2.8e-09	srj-29
WBGene00018353	41.9139	-8.08494	1.29446	-6.24582	4.22e-10	1.78e-09	fbxa-182
WBGene00012328	41.8336	-8.08199	1.26983	-6.36463	1.96e-10	8.52e-10	W07G1.1
WBGene00022891	41.8334	-8.08152	1.4288	-5.65618	1.55e-08	5.69e-08	ZK1290.10
WBGene00021648	41.5658	-8.07224	1.31812	-6.12405	9.12e-10	3.75e-09	mis-12
WBGene00011179	41.3926	-8.06664	1.26787	-6.36236	1.99e-10	8.64e-10	R09H10.1
WBGene00009862	40.8183	-8.04596	1.286	-6.25656	3.94e-10	1.67e-09	fbxb-67
WBGene00013281	40.7806	-8.04511	1.31656	-6.11071	9.92e-10	4.07e-09	sre-27
WBGene00020017	40.7706	-8.04412	1.49287	-5.38834	7.11e-08	2.44e-07	R12A1.3
WBGene00005347	40.7088	-8.04252	1.35053	-5.9551	2.6e-09	1.03e-08	srh-130
WBGene00018133	40.6772	-8.04089	1.47414	-5.45464	4.91e-08	1.71e-07	F37A4.3
WBGene00005247	40.2107	-8.02483	1.29247	-6.20889	5.34e-10	2.23e-09	srh-22
WBGene00044138	40.1679	-8.02274	1.28988	-6.21975	4.98e-10	2.09e-09	sssh-1
WBGene00003650	40.0568	-8.01915	1.26872	-6.32065	2.6e-10	1.12e-09	nhr-60
WBGene00005664	40.0005	-8.01721	1.36482	-5.87421	4.25e-09	1.65e-08	sru-1
WBGene00011699	211.418	-8.0163	1.44715	-5.53938	3.04e-08	1.08e-07	cyp-34A2
WBGene00009136	39.9527	-8.01551	1.28712	-6.22749	4.74e-10	1.99e-09	lurp-3
WBGene00020034	39.9264	-8.01462	1.27883	-6.26713	3.68e-10	1.56e-09	R12E2.8
WBGene00015311	39.812	-8.01065	1.55419	-5.15424	2.55e-07	8.23e-07	C01G5.9
WBGene00012583	39.557	-8.00082	1.35718	-5.8952	3.74e-09	1.46e-08	clec-4
WBGene00008575	39.5228	-8.00018	1.33916	-5.97404	2.31e-09	9.2e-09	scl-24
WBGene00008340	39.527	-8.00001	1.27053	-6.29659	3.04e-10	1.3e-09	C55A6.11
WBGene00010750	218.027	-7.99819	0.938617	-8.52125	1.58e-17	1.2e-16	K10D11.6
WBGene00001829	213.468	-7.99574	0.902225	-8.86224	7.84e-19	6.5e-18	hcp-1
WBGene00020778	39.3758	-7.99414	1.28933	-6.20022	5.64e-10	2.35e-09	T24E12.11
WBGene00016071	39.3676	-7.9939	1.30245	-6.13759	8.38e-10	3.45e-09	C24H12.1
WBGene00001123	39.3699	-7.99373	1.30313	-6.13424	8.56e-10	3.52e-09	dyf-7
WBGene00005542	39.3426	-7.99351	1.28165	-6.23691	4.46e-10	1.88e-09	sri-30
WBGene00021963	39.2346	-7.989	1.28727	-6.20616	5.43e-10	2.27e-09	lipl-6
WBGene00012270	141.323	-7.9853	1.09776	-7.27417	3.49e-13	1.92e-12	W04G5.10
WBGene00044361	39.1059	-7.98479	1.36353	-5.85599	4.74e-09	1.83e-08	K09F6.11
WBGene00017570	38.9965	-7.98044	1.28989	-6.1869	6.14e-10	2.56e-09	F18E9.4
WBGene00005533	38.9393	-7.97841	1.27585	-6.2534	4.02e-10	1.7e-09	sri-21
WBGene00015396	38.7667	-7.97146	1.30022	-6.13087	8.74e-10	3.6e-09	nhr-148
WBGene00006209	38.7508	-7.97129	1.6143	-4.93791	7.9e-07	2.44e-06	str-164
WBGene00010754	38.722	-7.97075	1.31576	-6.0579	1.38e-09	5.59e-09	K10G4.5
WBGene00016896	38.5524	-7.96407	1.46465	-5.43751	5.4e-08	1.88e-07	nep-4
WBGene00019668	38.0639	-7.94526	1.47732	-5.37814	7.53e-08	2.57e-07	fil-2
WBGene00044707	37.8262	-7.93692	1.35546	-5.85553	4.75e-09	1.84e-08	pals-15
WBGene00005037	37.7878	-7.93536	1.28544	-6.17328	6.69e-10	2.78e-09	sra-11
WBGene00008099	204.244	-7.93418	0.929972	-8.53164	1.44e-17	1.1e-16	C44H9.4
WBGene00009240	37.6419	-7.92901	1.29504	-6.12262	9.2e-10	3.78e-09	F28H7.7
WBGene00015613	37.6229	-7.92814	1.44896	-5.47161	4.46e-08	1.56e-07	C08F1.10
WBGene00005245	37.5543	-7.92631	1.35056	-5.86891	4.39e-09	1.7e-08	srh-20
WBGene00019669	206.301	-7.92581	0.897786	-8.82817	1.06e-18	8.76e-18	K12B6.4
WBGene00016928	37.5338	-7.92573	1.31842	-6.01153	1.84e-09	7.37e-09	srb-19
WBGene00000242	275.497	-7.92558	0.78908	-10.0441	9.76e-24	1.08e-22	bbs-2
WBGene00044898	37.4342	-7.92176	1.28336	-6.17269	6.71e-10	2.79e-09	let-383
WBGene00008692	408.303	-7.90918	0.701378	-11.2766	1.71e-29	2.68e-28	scav-4
WBGene00018630	36.8896	-7.89987	1.73026	-4.56571	4.98e-06	1.4e-05	F49D11.6
WBGene00009630	36.6736	-7.89207	1.30473	-6.04882	1.46e-09	5.9e-09	F42E8.1
WBGene00001859	36.6047	-7.88962	1.32663	-5.94711	2.73e-09	1.08e-08	hil-8
WBGene00017020	36.5808	-7.88831	1.2938	-6.09703	1.08e-09	4.41e-09	D1014.7
WBGene00021951	36.3771	-7.88026	1.39219	-5.66034	1.51e-08	5.56e-08	srt-24
WBGene00022325	36.2957	-7.87702	1.27665	-6.17007	6.83e-10	2.83e-09	fbxa-5
WBGene00015367	36.2682	-7.87605	1.37246	-5.73863	9.54e-09	3.58e-08	srt-64
WBGene00001107	36.0329	-7.86631	1.27871	-6.15176	7.66e-10	3.17e-09	dsl-5
WBGene00018489	35.9348	-7.86206	1.78452	-4.40569	1.05e-05	2.86e-05	F46E10.2
WBGene00010521	35.9157	-7.86139	1.34624	-5.83952	5.24e-09	2.02e-08	K03A11.4
WBGene00006154	70.1254	-7.86011	1.25122	-6.28198	3.34e-10	1.42e-09	str-97
WBGene00008251	35.848	-7.85906	1.30004	-6.04525	1.49e-09	6.03e-09	srsx-30
WBGene00017278	35.7665	-7.8555	1.31827	-5.95893	2.54e-09	1.01e-08	F09C12.6
WBGene00008617	35.7155	-7.85311	1.38143	-5.68477	1.31e-08	4.85e-08	F09C6.3
WBGene00044373	35.698	-7.85294	1.3033	-6.02544	1.69e-09	6.79e-09	C17F4.11
WBGene00006002	35.7036	-7.85286	1.39754	-5.61904	1.92e-08	6.99e-08	srx-111
WBGene00011197	191.184	-7.85158	1.10405	-7.11158	1.15e-12	6.06e-12	srw-145
WBGene00022858	436.683	-7.83737	0.914969	-8.56573	1.07e-17	8.28e-17	ZK1193.2
WBGene00000979	35.2874	-7.83565	1.38237	-5.66826	1.44e-08	5.32e-08	dhs-16
WBGene00020472	35.2413	-7.83488	1.53928	-5.08997	3.58e-07	1.14e-06	lips-11
WBGene00007378	35.2568	-7.83478	1.30003	-6.02661	1.67e-09	6.74e-09	lido-17
WBGene00010694	35.2207	-7.83324	1.31196	-5.97065	2.36e-09	9.38e-09	bgnt-1.5
WBGene00019515	324.591	-7.82927	0.804355	-9.7336	2.17e-22	2.22e-21	ugt-19
WBGene00015057	1204.11	-7.82851	2.00268	-3.90902	9.27e-05	0.000223775	gad-3
WBGene00008550	34.998	-7.82414	1.48798	-5.25822	1.45e-07	4.83e-07	F07B10.4
WBGene00007820	126.031	-7.81964	1.10013	-7.10791	1.18e-12	6.22e-12	clec-199
WBGene00013276	34.6884	-7.81178	1.54919	-5.04248	4.6e-07	1.45e-06	sre-42
WBGene00009968	1127.37	-7.80703	1.97695	-3.94902	7.85e-05	0.000191152	fig-1
WBGene00022547	186.181	-7.80198	0.995144	-7.84005	4.5e-15	2.87e-14	ZC196.3
WBGene00020175	34.4438	-7.80165	1.29159	-6.04036	1.54e-09	6.2e-09	T02H6.5
WBGene00020313	34.421	-7.80079	1.41218	-5.52395	3.31e-08	1.18e-07	T07E3.2
WBGene00014173	1504.74	-7.79635	1.58867	-4.90747	9.23e-07	2.83e-06	ZK970.7
WBGene00016699	34.2912	-7.79524	1.32333	-5.89064	3.85e-09	1.5e-08	del-7
WBGene00017093	34.2999	-7.79481	1.42565	-5.46755	4.56e-08	1.59e-07	E02C12.8
WBGene00008489	34.1781	-7.78991	1.28557	-6.0595	1.37e-09	5.53e-09	srb-17
WBGene00013986	34.1417	-7.78921	1.40044	-5.56198	2.67e-08	9.57e-08	ZK512.7
WBGene00020594	34.0725	-7.78596	1.36547	-5.70205	1.18e-08	4.4e-08	ugt-10
WBGene00022335	34.0589	-7.78527	1.29671	-6.00385	1.93e-09	7.72e-09	Y82E9BR.2
WBGene00004007	34.0013	-7.78305	1.30883	-5.94657	2.74e-09	1.08e-08	pgp-13
WBGene00013402	33.9923	-7.78191	1.29898	-5.9908	2.09e-09	8.34e-09	Y62H9A.14
WBGene00009446	33.9513	-7.78041	1.33095	-5.84574	5.04e-09	1.95e-08	F35H8.1
WBGene00045331	33.9005	-7.77864	1.35822	-5.72709	1.02e-08	3.82e-08	F14D7.12
WBGene00005248	33.7976	-7.77442	1.29927	-5.9837	2.18e-09	8.69e-09	srh-23
WBGene00012028	33.7189	-7.77093	1.35123	-5.75099	8.87e-09	3.34e-08	srz-99
WBGene00017465	33.6947	-7.76901	1.38317	-5.61683	1.94e-08	7.08e-08	F14F9.2
WBGene00013119	1294.23	-7.76466	0.528377	-14.6953	6.91e-49	3.14e-47	Y51H4A.25
WBGene00015279	242.022	-7.7646	0.81839	-9.48765	2.36e-21	2.28e-20	C01B10.4
WBGene00010850	1374.61	-7.76336	0.580826	-13.3661	9.55e-41	2.76e-39	M04C3.1
WBGene00020578	33.4074	-7.75736	1.28333	-6.0447	1.5e-09	6.05e-09	T19D12.3
WBGene00012699	33.353	-7.75521	1.31609	-5.89263	3.8e-09	1.48e-08	Y39B6A.41
WBGene00017544	33.3531	-7.75468	1.32823	-5.83837	5.27e-09	2.03e-08	lgc-6
WBGene00004224	33.1056	-7.74452	1.52415	-5.08119	3.75e-07	1.19e-06	ptr-10
WBGene00021086	33.1054	-7.74371	1.60069	-4.83772	1.31e-06	3.96e-06	W08E12.4
WBGene00011582	33.0968	-7.74361	1.30751	-5.9224	3.17e-09	1.24e-08	ntr-1
WBGene00015968	33.0638	-7.74255	1.40457	-5.51239	3.54e-08	1.25e-07	C18C4.7
WBGene00007425	234.938	-7.74137	1.06838	-7.24592	4.3e-13	2.35e-12	C08B6.4
WBGene00019064	20379.4	-7.73833	0.641669	-12.0597	1.72e-33	3.39e-32	myo-5
WBGene00000680	32.936	-7.73707	1.3306	-5.81473	6.07e-09	2.32e-08	col-106
WBGene00012834	359.081	-7.73221	0.657954	-11.7519	6.9e-32	1.25e-30	Y43F8C.13
WBGene00021465	32.8187	-7.73172	1.31317	-5.88784	3.91e-09	1.52e-08	ekl-7
WBGene00020309	32.7824	-7.73033	1.31131	-5.89512	3.74e-09	1.46e-08	T07D3.6
WBGene00017107	32.7606	-7.72961	1.40013	-5.52065	3.38e-08	1.2e-07	srt-12
WBGene00022345	32.7683	-7.72959	1.30685	-5.91468	3.33e-09	1.3e-08	fbxa-138
WBGene00018256	32.7761	-7.72913	1.408	-5.48944	4.03e-08	1.42e-07	cutl-28
WBGene00007490	177.13	-7.72846	0.938767	-8.23256	1.83e-16	1.29e-15	mks-5
WBGene00015178	32.6156	-7.72294	1.30028	-5.93945	2.86e-09	1.13e-08	B0416.2
WBGene00016870	32.6013	-7.72217	1.2928	-5.97321	2.33e-09	9.24e-09	ets-10
WBGene00018539	32.599	-7.72206	1.53396	-5.03408	4.8e-07	1.51e-06	nhr-185
WBGene00013399	32.4485	-7.71518	1.31553	-5.86469	4.5e-09	1.74e-08	Y62H9A.11
WBGene00011673	233.641	-7.71488	0.833898	-9.25159	2.21e-20	2.01e-19	cyp-13A6
WBGene00005117	32.4365	-7.71448	1.31549	-5.86434	4.51e-09	1.75e-08	srd-39
WBGene00008609	32.3512	-7.71084	1.31486	-5.86437	4.51e-09	1.75e-08	F09B12.5
WBGene00202499	32.2834	-7.70845	1.36798	-5.6349	1.75e-08	6.4e-08	B0507.15
WBGene00004402	32.2633	-7.70688	1.29783	-5.93829	2.88e-09	1.13e-08	rom-3
WBGene00009014	32.2618	-7.70661	1.29364	-5.95732	2.56e-09	1.02e-08	F21D5.9
WBGene00044091	32.221	-7.7046	1.31783	-5.84641	5.02e-09	1.94e-08	srbc-60
WBGene00000644	32.1238	-7.7009	1.28753	-5.98113	2.22e-09	8.82e-09	col-68
WBGene00003957	355.468	-7.70026	0.92982	-8.28145	1.22e-16	8.69e-16	pcp-2
WBGene00008061	32.0263	-7.69631	1.28795	-5.97563	2.29e-09	9.11e-09	C41G7.3
WBGene00010595	172.225	-7.69549	1.03425	-7.44068	1e-13	5.76e-13	haao-1
WBGene00020638	31.8758	-7.68911	1.3091	-5.8736	4.26e-09	1.66e-08	fbxa-43
WBGene00018920	31.8263	-7.68711	1.31089	-5.86404	4.52e-09	1.75e-08	F56A4.12
WBGene00000457	114.487	-7.67993	1.1194	-6.86077	6.85e-12	3.4e-11	ceh-36
WBGene00010782	31.643	-7.67839	1.37146	-5.59871	2.16e-08	7.83e-08	K11H3.5
WBGene00017436	31.5702	-7.67545	1.32641	-5.78664	7.18e-09	2.73e-08	F13H8.3
WBGene00004281	344.338	-7.67169	0.654448	-11.7224	9.79e-32	1.75e-30	rab-28
WBGene00011212	684.757	-7.67159	0.691437	-11.0951	1.32e-28	1.97e-27	R10E8.6
WBGene00013655	31.3681	-7.66651	1.28816	-5.95153	2.66e-09	1.05e-08	lgc-19
WBGene00008076	512.93	-7.66635	0.552952	-13.8644	1.04e-43	3.63e-42	lgc-43
WBGene00007732	31.3377	-7.66554	1.3352	-5.74111	9.41e-09	3.53e-08	spe-44
WBGene00005090	31.3385	-7.66529	1.35558	-5.6546	1.56e-08	5.74e-08	srd-12
WBGene00006416	31.3114	-7.6639	1.36881	-5.59894	2.16e-08	7.82e-08	sams-5
WBGene00022756	31.2957	-7.6635	1.35122	-5.67156	1.42e-08	5.22e-08	nhr-251
WBGene00005586	31.2143	-7.65869	1.49243	-5.13168	2.87e-07	9.24e-07	sri-74
WBGene00005362	31.1797	-7.65776	1.32573	-5.77625	7.64e-09	2.89e-08	srh-146
WBGene00009522	31.1517	-7.6567	1.31315	-5.83079	5.52e-09	2.12e-08	F38A1.9
WBGene00189950	31.0672	-7.6519	1.3479	-5.67689	1.37e-08	5.07e-08	C39B5.14
WBGene00015230	31.0291	-7.65136	1.42023	-5.38741	7.15e-08	2.45e-07	tag-344
WBGene00008551	31.0162	-7.65073	1.36778	-5.59352	2.23e-08	8.06e-08	lgc-36
WBGene00020572	567.829	-7.64841	0.624477	-12.2477	1.73e-34	3.63e-33	rund-1
WBGene00077559	30.846	-7.64196	1.29311	-5.90976	3.43e-09	1.34e-08	R05D7.7
WBGene00015397	30.8459	-7.64173	1.38222	-5.5286	3.23e-08	1.15e-07	nhr-149
WBGene00003099	30.8041	-7.64001	1.52343	-5.01499	5.3e-07	1.66e-06	lys-10
WBGene00010034	30.6743	-7.63457	1.32457	-5.76383	8.22e-09	3.11e-08	F54B11.11
WBGene00013498	30.676	-7.63379	1.30756	-5.83818	5.28e-09	2.03e-08	Y70G10A.2
WBGene00008900	895.437	-7.63348	1.92426	-3.96696	7.28e-05	0.000178149	F16H6.10
WBGene00021226	30.5847	-7.62967	1.31924	-5.7834	7.32e-09	2.78e-08	F56A4.12
WBGene00020646	30.537	-7.62784	1.3161	-5.79577	6.8e-09	2.59e-08	zmp-6
WBGene00013066	30.5302	-7.62769	1.31847	-5.78525	7.24e-09	2.75e-08	Y51A2B.2
WBGene00005243	30.4588	-7.62442	1.32699	-5.74565	9.16e-09	3.44e-08	srh-18
WBGene00009228	30.4703	-7.624	1.33202	-5.72363	1.04e-08	3.9e-08	F28G4.3
WBGene00235316	30.4162	-7.62157	1.34175	-5.68031	1.34e-08	4.97e-08	B0222.15
WBGene00008727	30.409	-7.62097	1.49072	-5.11228	3.18e-07	1.02e-06	F13A7.12
WBGene00045177	30.3294	-7.61816	1.33034	-5.72646	1.03e-08	3.83e-08	T21D12.14
WBGene00000084	441.615	-7.61741	0.596363	-12.7731	2.32e-37	5.6e-36	aex-1
WBGene00008632	30.3088	-7.61654	1.30075	-5.8555	4.76e-09	1.84e-08	fbxa-88
WBGene00016933	30.242	-7.6132	1.32872	-5.72975	1.01e-08	3.76e-08	C54G7.1
WBGene00009312	30.1673	-7.61006	1.30598	-5.82707	5.64e-09	2.16e-08	F32B4.1
WBGene00001545	30.155	-7.60891	1.34325	-5.66457	1.47e-08	5.43e-08	gcy-20
WBGene00001665	760.488	-7.60734	0.520083	-14.6272	1.88e-48	8.42e-47	gpa-3
WBGene00007947	331.494	-7.60714	0.836456	-9.09449	9.5e-20	8.36e-19	C35A5.3
WBGene00019913	30.0927	-7.60673	1.38188	-5.50464	3.7e-08	1.3e-07	R06B10.2
WBGene00007777	30.007	-7.60223	1.56099	-4.87014	1.12e-06	3.39e-06	C27D8.1
WBGene00000694	29.8479	-7.59503	1.35113	-5.62122	1.9e-08	6.91e-08	col-120
WBGene00005004	29.8158	-7.5935	1.30021	-5.84022	5.21e-09	2.01e-08	spp-19
WBGene00021860	29.7816	-7.59205	1.36305	-5.56991	2.55e-08	9.16e-08	fbxa-9
WBGene00010604	29.7651	-7.59074	1.29117	-5.87897	4.13e-09	1.6e-08	nhr-199
WBGene00018435	279.731	-7.58983	0.864331	-8.78115	1.62e-18	1.32e-17	btb-9
WBGene00000783	277.701	-7.58543	0.832286	-9.11398	7.94e-20	7.03e-19	cpr-3
WBGene00005541	29.4822	-7.57753	1.34945	-5.61527	1.96e-08	7.14e-08	sri-29
WBGene00220257	29.4102	-7.57381	1.34897	-5.61451	1.97e-08	7.17e-08	C02H6.3
WBGene00009166	29.2863	-7.56792	1.34934	-5.60859	2.04e-08	7.41e-08	F26F2.1
WBGene00022827	29.1512	-7.56002	1.36743	-5.52865	3.23e-08	1.15e-07	ZK816.4
WBGene00015522	29.0814	-7.557	1.29679	-5.82748	5.63e-09	2.16e-08	C06E1.7
WBGene00021389	29.0497	-7.55516	1.32471	-5.70327	1.18e-08	4.37e-08	Y38A10A.2
WBGene00021254	160.304	-7.55459	0.927361	-8.14634	3.75e-16	2.59e-15	Y22D7AL.16
WBGene00012592	261.31	-7.55342	0.743136	-10.1642	2.86e-24	3.29e-23	Y38E10A.14
WBGene00018660	28.9873	-7.5527	1.32729	-5.6903	1.27e-08	4.7e-08	F52C6.3
WBGene00002125	642.923	-7.5516	1.85199	-4.07756	4.55e-05	0.000114183	inx-3
WBGene00015416	28.9414	-7.54978	1.324	-5.70227	1.18e-08	4.39e-08	C04C3.6
WBGene00022412	704.703	-7.54923	1.83988	-4.10311	4.08e-05	0.00010296	Y102A11A.2
WBGene00001614	156.301	-7.54395	0.899526	-8.38658	5.01e-17	3.69e-16	glr-3
WBGene00021666	104.112	-7.54073	1.07647	-7.00506	2.47e-12	1.27e-11	Y48G1BL.7
WBGene00005530	28.7493	-7.54052	1.30087	-5.79652	6.77e-09	2.58e-08	sri-18
WBGene00008593	28.7042	-7.53807	1.35154	-5.57738	2.44e-08	8.8e-08	clec-227
WBGene00016929	28.6857	-7.53796	1.70249	-4.42761	9.53e-06	2.6e-05	C54F6.12
WBGene00013553	28.6975	-7.53788	1.36825	-5.50912	3.61e-08	1.27e-07	Y75B8A.18
WBGene00009350	499.575	-7.53407	1.66548	-4.52366	6.08e-06	1.69e-05	F32H5.4
WBGene00003633	253.893	-7.52975	1.06923	-7.0422	1.89e-12	9.82e-12	nhr-43
WBGene00011365	28.4975	-7.52832	1.44442	-5.212	1.87e-07	6.13e-07	T02C1.1
WBGene00007866	28.447	-7.52492	1.31891	-5.70542	1.16e-08	4.32e-08	C32H11.3
WBGene00194895	28.4298	-7.52407	1.3148	-5.72261	1.05e-08	3.92e-08	ZK105.11
WBGene00008936	364.049	-7.52157	0.655179	-11.4802	1.66e-30	2.76e-29	papl-1
WBGene00016471	28.3634	-7.52065	1.49225	-5.0398	4.66e-07	1.47e-06	srab-8
WBGene00020136	28.3411	-7.52053	1.69045	-4.44884	8.63e-06	2.36e-05	nlp-45
WBGene00194710	28.349	-7.52013	1.30898	-5.74501	9.19e-09	3.45e-08	mks-2
WBGene00000190	4852.19	-7.51594	1.51493	-4.96124	7e-07	2.17e-06	arf-1.1
WBGene00009375	899.653	-7.51511	0.636462	-11.8076	3.56e-32	6.56e-31	F34D10.6
WBGene00021434	28.2078	-7.51276	1.35489	-5.5449	2.94e-08	1.05e-07	Y39A3A.3
WBGene00018223	28.1761	-7.51145	1.31455	-5.71408	1.1e-08	4.11e-08	bath-13
WBGene00195145	28.1396	-7.51023	1.3724	-5.47235	4.44e-08	1.55e-07	ZK666.15
WBGene00021028	28.1505	-7.51002	1.32122	-5.68414	1.31e-08	4.87e-08	W04C9.6
WBGene00044386	28.1407	-7.50975	1.36144	-5.51603	3.47e-08	1.23e-07	C27A2.7
WBGene00004179	260.49	-7.50899	0.755439	-9.9399	2.79e-23	3.02e-22	prg-2
WBGene00005701	28.107	-7.50764	1.45927	-5.14479	2.68e-07	8.64e-07	sru-38
WBGene00001546	353.399	-7.50731	0.702899	-10.6805	1.26e-26	1.66e-25	gcy-21
WBGene00077548	27.9855	-7.50131	1.33613	-5.61419	1.97e-08	7.19e-08	F21C3.7
WBGene00012634	27.9436	-7.49937	1.30731	-5.73651	9.66e-09	3.62e-08	Y38H6C.23
WBGene00015049	27.9236	-7.49894	1.34727	-5.56604	2.61e-08	9.36e-08	B0218.5
WBGene00015388	27.8411	-7.49378	1.34255	-5.58177	2.38e-08	8.59e-08	C03F11.2
WBGene00019603	150.499	-7.49254	0.940493	-7.96661	1.63e-15	1.08e-14	K09H11.6
WBGene00009791	27.7659	-7.48985	1.34851	-5.55416	2.79e-08	9.98e-08	F46F3.3
WBGene00022024	27.7229	-7.48763	1.7399	-4.30349	1.68e-05	4.46e-05	Y64H9A.2
WBGene00006143	27.6967	-7.48666	1.50094	-4.98796	6.1e-07	1.9e-06	str-84
WBGene00017955	27.6723	-7.48613	1.35299	-5.53303	3.15e-08	1.12e-07	F31E8.5
WBGene00021953	54.1145	-7.48412	1.40958	-5.30946	1.1e-07	3.69e-07	Y55H10A.2
WBGene00013389	27.589	-7.48148	1.40991	-5.30635	1.12e-07	3.75e-07	Y62H9A.1
WBGene00013837	27.5004	-7.476	1.36442	-5.47924	4.27e-08	1.5e-07	fbxa-30
WBGene00012070	342.524	-7.47591	0.797611	-9.37288	7.06e-21	6.6e-20	T26H5.8
WBGene00016641	244.559	-7.47519	0.942936	-7.92757	2.23e-15	1.46e-14	C44C1.1
WBGene00138711	27.3648	-7.46874	1.44193	-5.17968	2.22e-07	7.23e-07	R07B1.13
WBGene00012266	27.3114	-7.46692	1.30832	-5.70727	1.15e-08	4.27e-08	W04G5.5
WBGene00011364	476.904	-7.46667	1.66257	-4.49103	7.09e-06	1.96e-05	T02B5.3
WBGene00012682	27.2835	-7.46527	1.31224	-5.68896	1.28e-08	4.73e-08	asp-16
WBGene00050906	27.2583	-7.46437	1.66685	-4.47813	7.53e-06	2.07e-05	F20E11.17
WBGene00020744	27.1559	-7.4585	1.36596	-5.46027	4.75e-08	1.66e-07	T24A6.1
WBGene00008066	27.1126	-7.45652	1.33511	-5.58496	2.34e-08	8.45e-08	fbxb-65
WBGene00007861	27.0941	-7.4552	1.32012	-5.64736	1.63e-08	5.97e-08	C32A9.1
WBGene00007220	297.8	-7.4526	0.770621	-9.6709	4.01e-22	4.05e-21	C01B9.1
WBGene00010795	195.638	-7.45163	0.790504	-9.42644	4.24e-21	4.02e-20	M01A8.1
WBGene00021804	26.9914	-7.44929	1.31062	-5.68378	1.32e-08	4.87e-08	Y53G8AM.4
WBGene00010659	26.9771	-7.44882	1.32358	-5.62777	1.83e-08	6.67e-08	K08D8.5
WBGene00044066	26.9593	-7.44737	1.41962	-5.24604	1.55e-07	5.14e-07	fbxb-66
WBGene00016698	26.8781	-7.44407	1.43491	-5.18782	2.13e-07	6.94e-07	C46A5.1
WBGene00017366	26.8845	-7.44405	1.30829	-5.68991	1.27e-08	4.71e-08	F10G2.7
WBGene00000747	26.8858	-7.44328	1.41314	-5.2672	1.39e-07	4.61e-07	col-174
WBGene00019314	26.8249	-7.44097	1.43127	-5.19885	2.01e-07	6.56e-07	K02E7.10
WBGene00010518	26.804	-7.43994	1.43671	-5.17846	2.24e-07	7.28e-07	K02E11.9
WBGene00015259	26.7728	-7.43803	1.38177	-5.38298	7.33e-08	2.51e-07	dod-20
WBGene00018447	26.7697	-7.4377	1.30456	-5.70129	1.19e-08	4.41e-08	irld-9
WBGene00005059	26.7365	-7.43646	1.54591	-4.8104	1.51e-06	4.52e-06	sra-33
WBGene00010937	26.6886	-7.43331	1.37563	-5.40358	6.53e-08	2.25e-07	M163.5
WBGene00018111	26.6733	-7.43225	1.30712	-5.68595	1.3e-08	4.82e-08	F36H9.2
WBGene00009061	239.224	-7.43104	0.799978	-9.28906	1.56e-20	1.43e-19	pals-14
WBGene00019164	673.985	-7.42871	0.537917	-13.8101	2.21e-43	7.57e-42	H06H21.8
WBGene00022845	26.5886	-7.42734	1.35368	-5.48676	4.09e-08	1.44e-07	ZK1055.4
WBGene00018352	26.5608	-7.42695	1.35056	-5.49915	3.82e-08	1.34e-07	fbxc-20
WBGene00020576	1715.47	-7.42629	0.55483	-13.3848	7.42e-41	2.17e-39	T19D12.1
WBGene00009357	26.541	-7.42551	1.41346	-5.25344	1.49e-07	4.95e-07	F33C8.2
WBGene00017113	26.513	-7.42416	1.32074	-5.62123	1.9e-08	6.91e-08	srz-24
WBGene00001771	143.536	-7.4205	0.902952	-8.21804	2.07e-16	1.45e-15	gst-23
WBGene00010684	283.657	-7.417	0.762816	-9.72318	2.4e-22	2.46e-21	K08F9.1
WBGene00005755	26.3648	-7.41617	1.3248	-5.59794	2.17e-08	7.86e-08	srw-8
WBGene00020555	96.4314	-7.41498	1.07469	-6.89964	5.21e-12	2.61e-11	nhr-219
WBGene00010274	26.304	-7.41273	1.34567	-5.50859	3.62e-08	1.28e-07	F58G6.3
WBGene00001796	498.224	-7.40916	1.71815	-4.31229	1.62e-05	4.29e-05	gtl-2
WBGene00000060	144.449	-7.40907	0.897113	-8.25879	1.47e-16	1.05e-15	acr-21
WBGene00206413	26.2434	-7.40891	1.32364	-5.59739	2.18e-08	7.88e-08	ZK1240.11
WBGene00009255	26.1849	-7.40573	1.43758	-5.15153	2.58e-07	8.35e-07	ugt-34
WBGene00018825	26.1542	-7.40443	1.32	-5.60942	2.03e-08	7.38e-08	F54E2.5
WBGene00004359	428.625	-7.40274	0.55384	-13.3662	9.53e-41	2.76e-39	rhr-2
WBGene00017645	26.117	-7.40224	1.32135	-5.60203	2.12e-08	7.69e-08	F20D12.7
WBGene00001950	26.0789	-7.39949	1.37572	-5.37863	7.51e-08	2.57e-07	hlh-3
WBGene00010592	279.799	-7.39947	0.787156	-9.40025	5.44e-21	5.12e-20	K06A4.2
WBGene00003219	26.04	-7.3982	1.40007	-5.28416	1.26e-07	4.22e-07	mes-1
WBGene00022571	26.0244	-7.39749	1.34029	-5.51932	3.4e-08	1.2e-07	ZC239.13
WBGene00001549	95.3254	-7.39607	1.08881	-6.79283	1.1e-11	5.37e-11	gcy-25
WBGene00005163	25.971	-7.39403	1.33971	-5.51912	3.41e-08	1.21e-07	srg-5
WBGene00022417	25.9752	-7.39368	1.34562	-5.49462	3.92e-08	1.38e-07	Y102A11A.7
WBGene00018552	25.954	-7.39261	1.37613	-5.37203	7.79e-08	2.66e-07	srt-19
WBGene00007423	25.9288	-7.39235	1.43244	-5.16067	2.46e-07	7.97e-07	C08B6.2
WBGene00021530	25.8756	-7.3885	1.31681	-5.61089	2.01e-08	7.32e-08	Y41G9A.6
WBGene00005293	25.842	-7.38698	1.58843	-4.6505	3.31e-06	9.53e-06	srh-72
WBGene00018300	25.8329	-7.38668	1.32616	-5.56998	2.55e-08	9.16e-08	F41G3.3
WBGene00010217	25.6465	-7.37632	1.59042	-4.63798	3.52e-06	1.01e-05	sre-31
WBGene00000005	25.6373	-7.37479	1.38268	-5.3337	9.62e-08	3.26e-07	aat-4
WBGene00017493	25.6289	-7.37439	1.33515	-5.52327	3.33e-08	1.18e-07	irld-30
WBGene00000484	274.876	-7.37087	0.757981	-9.72434	2.37e-22	2.43e-21	che-2
WBGene00011922	25.4898	-7.36688	1.4178	-5.19601	2.04e-07	6.66e-07	T22C8.1
WBGene00005339	25.4776	-7.36663	1.32664	-5.55283	2.81e-08	1.01e-07	srh-120
WBGene00017083	25.4785	-7.36646	1.30949	-5.62546	1.85e-08	6.75e-08	kin-33
WBGene00011290	25.4632	-7.36586	1.39766	-5.27014	1.36e-07	4.54e-07	R102.3
WBGene00017329	321.359	-7.3651	0.635718	-11.5855	4.88e-31	8.37e-30	ugt-39
WBGene00014194	25.435	-7.36388	1.36309	-5.40236	6.58e-08	2.26e-07	ZK1037.6
WBGene00016464	25.4021	-7.36186	1.33758	-5.50385	3.72e-08	1.31e-07	C36B7.1
WBGene00000373	719.77	-7.36052	1.99217	-3.69473	0.000220119	0.000505774	cyp-14A5
WBGene00010558	572.01	-7.35828	0.677475	-10.8613	1.76e-27	2.44e-26	ptp-4
WBGene00009571	25.3245	-7.35806	1.33039	-5.53076	3.19e-08	1.13e-07	F40D4.12
WBGene00044649	25.3073	-7.35712	1.33044	-5.52984	3.21e-08	1.14e-07	C23H5.11
WBGene00011471	370.797	-7.35522	0.589429	-12.4785	9.78e-36	2.19e-34	T05C12.8
WBGene00009835	1014.86	-7.35208	0.494841	-14.8574	6.23e-50	3.04e-48	F47H4.2
WBGene00011090	457.737	-7.35067	0.54929	-13.3821	7.69e-41	2.25e-39	R07B7.6
WBGene00015964	136.711	-7.35013	0.904649	-8.12484	4.48e-16	3.08e-15	glb-5
WBGene00020792	25.1137	-7.34583	1.31554	-5.58391	2.35e-08	8.49e-08	T25B6.6
WBGene00003890	736.832	-7.34514	0.582184	-12.6165	1.71e-36	3.97e-35	osm-10
WBGene00011744	25.1076	-7.34479	1.33249	-5.51208	3.55e-08	1.25e-07	T13F2.4
WBGene00000287	406.634	-7.34451	0.576472	-12.7405	3.52e-37	8.4e-36	cal-3
WBGene00009227	25.0726	-7.34331	1.38341	-5.30813	1.11e-07	3.72e-07	F28G4.2
WBGene00006630	25.0571	-7.34221	1.31059	-5.60222	2.12e-08	7.68e-08	tsp-4
WBGene00019565	25.049	-7.34119	1.40085	-5.24051	1.6e-07	5.29e-07	cyp-35A3
WBGene00010799	138.785	-7.34059	0.952715	-7.70491	1.31e-14	8.07e-14	chil-12
WBGene00011753	25.0097	-7.3401	1.38306	-5.30716	1.11e-07	3.74e-07	T13F3.6
WBGene00268206	25.0185	-7.33986	1.33297	-5.50638	3.66e-08	1.29e-07	F54E2.9
WBGene00012847	25.0174	-7.33982	1.35257	-5.42657	5.74e-08	1.99e-07	srxa-15
WBGene00015036	24.9724	-7.33722	1.44011	-5.09491	3.49e-07	1.11e-06	sre-5
WBGene00015079	24.96	-7.33688	1.31635	-5.57368	2.49e-08	8.98e-08	B0244.4
WBGene00014063	24.9529	-7.33625	1.33752	-5.48495	4.14e-08	1.45e-07	clec-143
WBGene00021703	24.9298	-7.33542	1.33128	-5.51006	3.59e-08	1.27e-07	cpt-3
WBGene00005738	24.8982	-7.33284	1.61178	-4.54953	5.38e-06	1.51e-05	srv-27
WBGene00021582	24.8913	-7.33265	1.3885	-5.28098	1.28e-07	4.29e-07	clec-71
WBGene00001237	24.8355	-7.32924	1.33015	-5.51009	3.59e-08	1.27e-07	elc-2
WBGene00006541	136.989	-7.32807	0.918263	-7.98036	1.46e-15	9.7e-15	tbh-1
WBGene00268196	24.7241	-7.32332	1.40393	-5.21631	1.83e-07	6e-07	F59A7.14
WBGene00018486	135.437	-7.31557	0.896482	-8.16031	3.34e-16	2.32e-15	glb-16
WBGene00019886	24.5531	-7.31282	1.54557	-4.73148	2.23e-06	6.55e-06	R05D8.9
WBGene00020973	24.5446	-7.31247	1.39425	-5.24472	1.57e-07	5.18e-07	W03B1.3
WBGene00007286	24.5295	-7.31137	1.31595	-5.55598	2.76e-08	9.88e-08	C04A11.2
WBGene00002348	41670	-7.30878	0.432755	-16.889	5.43e-64	5.18e-62	myo-1
WBGene00020281	24.4802	-7.30809	1.48398	-4.92467	8.45e-07	2.6e-06	T06A4.1
WBGene00010185	24.4334	-7.30595	1.33423	-5.47576	4.36e-08	1.53e-07	F57A10.4
WBGene00006027	24.4339	-7.30552	1.33279	-5.48137	4.22e-08	1.48e-07	srx-136
WBGene00003906	24.3673	-7.30247	1.32951	-5.4926	3.96e-08	1.39e-07	paf-1
WBGene00021609	24.37	-7.30216	1.34582	-5.42583	5.77e-08	1.99e-07	irld-17
WBGene00005845	24.3656	-7.30215	1.31867	-5.5375	3.07e-08	1.09e-07	srw-98
WBGene00001687	133.899	-7.29694	0.906628	-8.04844	8.39e-16	5.67e-15	gpn-1
WBGene00194746	24.2706	-7.29624	1.31771	-5.53708	3.08e-08	1.1e-07	pals-20
WBGene00005764	24.2517	-7.29515	1.44856	-5.03615	4.75e-07	1.5e-06	srw-17
WBGene00006162	24.253	-7.29484	1.36725	-5.3354	9.53e-08	3.23e-07	str-111
WBGene00007896	24.229	-7.29356	1.40522	-5.19034	2.1e-07	6.85e-07	C33D3.5
WBGene00005931	131.281	-7.2901	0.909484	-8.01565	1.1e-15	7.34e-15	fbxa-199
WBGene00007258	133.474	-7.2871	0.935876	-7.78639	6.9e-15	4.34e-14	hasp-1
WBGene00015710	24.0533	-7.28353	1.34933	-5.39788	6.74e-08	2.32e-07	C12D5.9
WBGene00020750	23.9933	-7.28035	1.39422	-5.22181	1.77e-07	5.83e-07	nhr-222
WBGene00017265	23.976	-7.27925	1.53407	-4.74507	2.08e-06	6.15e-06	snpc-1.3
WBGene00015784	23.9772	-7.27874	1.37572	-5.29087	1.22e-07	4.07e-07	C15B12.2
WBGene00015087	214.452	-7.2746	0.823791	-8.83063	1.04e-18	8.57e-18	B0252.1
WBGene00021947	23.8892	-7.27355	1.53759	-4.7305	2.24e-06	6.58e-06	srt-23
WBGene00022346	215.424	-7.27349	0.745217	-9.76024	1.67e-22	1.72e-21	pals-17
WBGene00005696	23.879	-7.2732	1.35964	-5.34935	8.83e-08	3e-07	sru-33
WBGene00005558	23.8844	-7.27264	1.3446	-5.40878	6.35e-08	2.19e-07	sri-46
WBGene00015100	23.834	-7.27019	1.34098	-5.42154	5.91e-08	2.04e-07	B0280.2
WBGene00021585	23.7752	-7.26625	1.53722	-4.72689	2.28e-06	6.7e-06	clec-74
WBGene00016107	128.713	-7.26234	0.903928	-8.0342	9.42e-16	6.35e-15	C25G6.1
WBGene00004898	561.069	-7.26129	0.555727	-13.0663	5.13e-39	1.35e-37	snb-2
WBGene00004963	23.661	-7.25934	1.32188	-5.49166	3.98e-08	1.4e-07	spe-9
WBGene00012939	23.6509	-7.25838	1.69998	-4.26968	1.96e-05	5.14e-05	subs-4
WBGene00019989	23.6253	-7.2568	1.51702	-4.7836	1.72e-06	5.12e-06	R09F10.8
WBGene00020788	1568	-7.25638	0.488484	-14.8549	6.47e-50	3.15e-48	nep-22
WBGene00011062	23.5892	-7.25543	1.33484	-5.43544	5.47e-08	1.9e-07	R06C7.2
WBGene00016429	23.5843	-7.25511	1.34251	-5.40415	6.51e-08	2.24e-07	C35A11.2
WBGene00003642	23.5838	-7.25458	1.33073	-5.4516	4.99e-08	1.74e-07	nhr-52
WBGene00016279	23.5672	-7.2536	1.33007	-5.45355	4.94e-08	1.72e-07	C31B8.1
WBGene00005342	23.5512	-7.25249	1.36096	-5.32895	9.88e-08	3.34e-07	srh-125
WBGene00019372	23.5446	-7.25229	1.33464	-5.4339	5.51e-08	1.91e-07	K03H9.3
WBGene00011666	23.4922	-7.24987	1.78661	-4.05789	4.95e-05	0.000123769	T09F5.2
WBGene00008794	23.4943	-7.24908	1.32774	-5.45973	4.77e-08	1.66e-07	F14D7.7
WBGene00012436	23.4639	-7.24682	1.54484	-4.69099	2.72e-06	7.91e-06	flh-3
WBGene00011168	126.285	-7.24615	1.04334	-6.94513	3.78e-12	1.91e-11	R09D1.12
WBGene00010368	23.3893	-7.24272	1.36721	-5.29743	1.17e-07	3.93e-07	H06A10.1
WBGene00219271	167.528	-7.23825	0.897913	-8.06119	7.56e-16	5.12e-15	F36H5.14
WBGene00050915	23.3041	-7.23786	1.3505	-5.35939	8.35e-08	2.84e-07	Y6E2A.10
WBGene00014107	464.439	-7.23469	0.821859	-8.80284	1.33e-18	1.09e-17	ZK856.6
WBGene00015850	23.2022	-7.23156	1.3286	-5.443	5.24e-08	1.82e-07	C16C8.12
WBGene00016017	23.1405	-7.22735	1.58277	-4.56626	4.96e-06	1.4e-05	C23G10.11
WBGene00015906	23.14	-7.22731	1.32831	-5.44098	5.3e-08	1.84e-07	C17E7.13
WBGene00022643	281.855	-7.22289	2.20738	-3.27216	0.00106729	0.00222016	ZK6.8
WBGene00016662	23.0661	-7.22243	1.35103	-5.34588	9e-08	3.06e-07	C45B2.8
WBGene00019391	169.266	-7.22192	0.927179	-7.78913	6.75e-15	4.25e-14	irld-11
WBGene00010883	23.0377	-7.22144	1.3562	-5.32475	1.01e-07	3.41e-07	M7.7
WBGene00007849	372.213	-7.22101	0.620392	-11.6394	2.6e-31	4.54e-30	tbc-19
WBGene00008678	23.0053	-7.21906	1.54059	-4.68592	2.79e-06	8.1e-06	stdh-2
WBGene00011056	22.9873	-7.21865	1.45178	-4.97228	6.62e-07	2.06e-06	R06B9.5
WBGene00044218	22.9755	-7.21749	1.32817	-5.43417	5.51e-08	1.91e-07	F23H12.10
WBGene00219317	22.884	-7.2111	1.40576	-5.12968	2.9e-07	9.33e-07	F31E3.12
WBGene00010205	22.8798	-7.21094	1.36004	-5.302	1.15e-07	3.84e-07	F57F5.3
WBGene00006193	22.8277	-7.20806	1.33104	-5.41537	6.12e-08	2.11e-07	str-146
WBGene00011317	165.029	-7.20731	0.799258	-9.0175	1.92e-19	1.66e-18	T01C1.4
WBGene00005670	22.8141	-7.20698	1.34219	-5.36957	7.89e-08	2.7e-07	sru-7
WBGene00017959	22.7804	-7.20522	1.44811	-4.97561	6.5e-07	2.02e-06	ugt-42
WBGene00020857	22.7232	-7.20117	1.33558	-5.39179	6.98e-08	2.4e-07	srt-62
WBGene00004061	697.082	-7.19996	0.486338	-14.8044	1.37e-49	6.53e-48	pmp-4
WBGene00016329	22.7008	-7.19916	1.64654	-4.37229	1.23e-05	3.3e-05	osr-1
WBGene00002057	1927	-7.19631	0.523191	-13.7547	4.78e-43	1.59e-41	ifd-1
WBGene00016521	22.5991	-7.19396	1.56247	-4.60422	4.14e-06	1.18e-05	fbxa-62
WBGene00015056	422.984	-7.19342	0.697065	-10.3196	5.75e-25	6.87e-24	B0222.5
WBGene00006149	22.608	-7.19335	1.40872	-5.1063	3.29e-07	1.05e-06	str-90
WBGene00001507	22.575	-7.19256	1.41839	-5.07092	3.96e-07	1.26e-06	fut-4
WBGene00016685	22.5685	-7.19178	1.54601	-4.65185	3.29e-06	9.47e-06	srbc-16
WBGene00007426	22.5683	-7.19149	1.32343	-5.43397	5.51e-08	1.91e-07	C08B6.5
WBGene00005363	22.5192	-7.1882	1.46144	-4.91858	8.72e-07	2.68e-06	srh-147
WBGene00000705	22.5162	-7.18747	1.84204	-3.9019	9.54e-05	0.00022997	col-131
WBGene00219376	201.701	-7.18094	0.776315	-9.25003	2.24e-20	2.04e-19	C28G1.10
WBGene00043052	22.3716	-7.17923	1.38447	-5.18553	2.15e-07	7.02e-07	srz-104
WBGene00007416	251.474	-7.17769	0.755009	-9.50677	1.97e-21	1.91e-20	ceh-57
WBGene00020582	201.452	-7.17765	0.759786	-9.44695	3.49e-21	3.32e-20	oig-8
WBGene00008567	120.985	-7.17649	0.990206	-7.24747	4.25e-13	2.32e-12	acox-1.4
WBGene00016231	22.3344	-7.17589	1.91796	-3.74142	0.000182984	0.000425571	C29G2.3
WBGene00006531	465.2	-7.17327	0.729776	-9.82941	8.41e-23	8.84e-22	tba-5
WBGene00194717	22.2718	-7.17304	1.48923	-4.8166	1.46e-06	4.38e-06	ZC239.22
WBGene00007368	122.584	-7.16751	0.912794	-7.85227	4.09e-15	2.62e-14	C06B8.2
WBGene00007734	22.192	-7.16666	1.35164	-5.30219	1.14e-07	3.84e-07	C25G4.7
WBGene00206533	22.161	-7.16498	1.36208	-5.26034	1.44e-07	4.78e-07	C30A5.16
WBGene00005665	22.1227	-7.1624	1.4143	-5.06427	4.1e-07	1.3e-06	sru-2
WBGene00010403	22.1212	-7.16194	1.54029	-4.64974	3.32e-06	9.56e-06	otpl-8
WBGene00005849	22.1157	-7.16174	1.38084	-5.18652	2.14e-07	6.99e-07	srw-102
WBGene00010123	22.0166	-7.15571	1.38854	-5.15339	2.56e-07	8.27e-07	F55G11.2
WBGene00011320	21.949	-7.15117	1.39522	-5.12548	2.97e-07	9.53e-07	T01C3.3
WBGene00008485	119.153	-7.14904	0.906244	-7.88865	3.05e-15	1.98e-14	ugt-43
WBGene00206365	21.9208	-7.14894	1.38347	-5.16741	2.37e-07	7.7e-07	B0563.18
WBGene00007071	1337.11	-7.1466	1.5621	-4.575	4.76e-06	1.34e-05	AC3.5
WBGene00010980	21.7743	-7.14007	1.36581	-5.22771	1.72e-07	5.65e-07	R02D5.7
WBGene00019342	78.8596	-7.13707	1.08625	-6.57036	5.02e-11	2.31e-10	K02F6.8
WBGene00016558	121.191	-7.13483	1.00261	-7.11624	1.11e-12	5.87e-12	pks-1
WBGene00044112	21.6998	-7.1344	1.38292	-5.15894	2.48e-07	8.04e-07	srm-5
WBGene00008009	21.6569	-7.13117	1.43992	-4.95249	7.33e-07	2.27e-06	fbxa-171
WBGene00044491	21.609	-7.12879	1.34537	-5.29875	1.17e-07	3.9e-07	Y54G2A.48
WBGene00008797	21.5654	-7.12542	1.34284	-5.30624	1.12e-07	3.75e-07	F14D7.10
WBGene00020360	2008.62	-7.12518	0.32127	-22.1781	5.58e-109	5.72e-106	math-41
WBGene00019339	78.1135	-7.12353	1.08784	-6.54829	5.82e-11	2.66e-10	K02F6.5
WBGene00019839	151.996	-7.12094	1.26518	-5.62842	1.82e-08	6.64e-08	R02F11.1
WBGene00017459	21.4879	-7.12094	1.37714	-5.1708	2.33e-07	7.57e-07	F14D2.11
WBGene00008785	21.4812	-7.11955	1.37118	-5.19229	2.08e-07	6.79e-07	F14B6.4
WBGene00005481	21.4586	-7.11921	1.41128	-5.0445	4.55e-07	1.43e-06	srh-276
WBGene00006227	21.4542	-7.1186	1.33153	-5.34618	8.98e-08	3.05e-07	str-183
WBGene00003551	115.308	-7.11762	1.09656	-6.49086	8.53e-11	3.85e-10	nas-33
WBGene00005934	21.4116	-7.11475	1.53305	-4.6409	3.47e-06	9.95e-06	srx-43
WBGene00044027	21.3946	-7.11372	1.37706	-5.16587	2.39e-07	7.76e-07	F27E5.8
WBGene00015704	909.939	-7.1104	0.682033	-10.4253	1.9e-25	2.34e-24	tiam-1
WBGene00009710	118.984	-7.10973	0.993091	-7.1592	8.12e-13	4.34e-12	F44G3.10
WBGene00005727	21.3124	-7.10857	1.33573	-5.32186	1.03e-07	3.46e-07	srv-16
WBGene00015985	21.3017	-7.10788	1.33681	-5.31706	1.05e-07	3.55e-07	C18G1.7
WBGene00016025	21.2908	-7.10744	1.35108	-5.26057	1.44e-07	4.77e-07	xbx-4
WBGene00005550	21.2857	-7.10712	1.34429	-5.28691	1.24e-07	4.16e-07	sri-38
WBGene00010680	21.2517	-7.10491	1.51417	-4.69228	2.7e-06	7.87e-06	K08F4.12
WBGene00005060	21.2535	-7.10446	1.34047	-5.29997	1.16e-07	3.88e-07	sra-34
WBGene00011949	21.249	-7.10373	1.54615	-4.59447	4.34e-06	1.23e-05	T23F6.1
WBGene00022035	21.2179	-7.10245	1.32877	-5.34515	9.03e-08	3.07e-07	Y65B4BL.3
WBGene00005033	21.2169	-7.10193	1.53673	-4.62147	3.81e-06	1.09e-05	sra-7
WBGene00017014	21.2067	-7.10118	1.35954	-5.22321	1.76e-07	5.79e-07	dylt-2
WBGene00019229	21.193	-7.10024	1.35048	-5.25757	1.46e-07	4.85e-07	ipla-5
WBGene00000446	200.857	-7.09143	0.96695	-7.33381	2.24e-13	1.25e-12	ceh-23
WBGene00018543	20.9979	-7.08743	1.38783	-5.10685	3.28e-07	1.05e-06	ugt-32
WBGene00018726	21.0024	-7.08697	1.5569	-4.55199	5.31e-06	1.49e-05	F53A9.3
WBGene00269424	20.9576	-7.0843	1.39361	-5.0834	3.71e-07	1.18e-06	K09D9.14
WBGene00008468	20.9161	-7.08158	1.39613	-5.07228	3.93e-07	1.25e-06	E03G2.1
WBGene00019166	2632.05	-7.08088	0.389213	-18.1928	5.88e-74	9.67e-72	tat-2
WBGene00000096	115.903	-7.07937	0.94918	-7.45841	8.76e-14	5.06e-13	ahr-1
WBGene00019393	20.8765	-7.07921	1.33506	-5.30255	1.14e-07	3.83e-07	irld-45
WBGene00020746	20.8766	-7.07889	1.35063	-5.24117	1.6e-07	5.28e-07	srbc-66
WBGene00015996	234.559	-7.07619	0.756279	-9.35658	8.24e-21	7.67e-20	C18H7.6
WBGene00005437	20.8257	-7.0761	1.42391	-4.96949	6.71e-07	2.08e-06	srh-229
WBGene00005904	20.8114	-7.07413	1.55962	-4.5358	5.74e-06	1.6e-05	srx-13
WBGene00007672	227.207	-7.07322	0.836318	-8.45757	2.73e-17	2.05e-16	fbxa-136
WBGene00021279	20.7758	-7.07135	1.81619	-3.8935	9.88e-05	0.00023778	Y23H5B.8
WBGene00206359	20.7608	-7.07095	1.3385	-5.28276	1.27e-07	4.25e-07	C05E4.15
WBGene00043062	112.741	-7.07084	0.936917	-7.54692	4.46e-14	2.64e-13	clec-80
WBGene00016820	20.7386	-7.06981	1.46202	-4.83563	1.33e-06	4e-06	C50E3.9
WBGene00013165	20.7374	-7.06967	1.35706	-5.20956	1.89e-07	6.21e-07	Y53F4B.19
WBGene00044783	20.7406	-7.0693	1.34338	-5.26232	1.42e-07	4.73e-07	T26H5.10
WBGene00020649	2505.61	-7.06706	0.37479	-18.856	2.62e-79	5.96e-77	sma-10
WBGene00018713	20.65	-7.06248	1.55635	-4.53785	5.68e-06	1.59e-05	F52G3.5
WBGene00010855	20.6104	-7.06062	1.37221	-5.14545	2.67e-07	8.61e-07	M04C7.4
WBGene00017867	111.824	-7.05792	0.922082	-7.65434	1.94e-14	1.18e-13	slc-28.1
WBGene00001718	20.5475	-7.05609	1.33854	-5.27149	1.35e-07	4.51e-07	grl-9
WBGene00011157	20.5277	-7.05531	1.57063	-4.49202	7.06e-06	1.95e-05	chil-15
WBGene00003071	9997.51	-7.05396	0.624716	-11.2915	1.45e-29	2.27e-28	lrp-1
WBGene00011184	111.535	-7.05395	0.920886	-7.65996	1.86e-14	1.13e-13	R09H10.7
WBGene00015456	20.4862	-7.05226	1.35764	-5.19448	2.05e-07	6.71e-07	C04G6.6
WBGene00022263	20.4689	-7.05002	1.39162	-5.06606	4.06e-07	1.29e-06	Y73C8C.4
WBGene00016692	20.4555	-7.0496	1.34176	-5.25399	1.49e-07	4.93e-07	srbc-24
WBGene00011616	20.4442	-7.04916	1.34525	-5.24003	1.61e-07	5.31e-07	T08D10.3
WBGene00016089	111.084	-7.04818	0.922515	-7.64017	2.17e-14	1.32e-13	aexr-1
WBGene00219493	20.4191	-7.04771	1.72635	-4.08242	4.46e-05	0.000111938	C18D4.12
WBGene00008250	20.3889	-7.04539	1.35835	-5.18674	2.14e-07	6.98e-07	srsx-29
WBGene00006148	20.3662	-7.04353	1.37146	-5.13578	2.81e-07	9.04e-07	str-89
WBGene00045050	75.0532	-7.04254	1.12506	-6.2597	3.86e-10	1.64e-09	ZC15.10
WBGene00010545	1041.36	-7.03895	0.366774	-19.1915	4.36e-82	1.2e-79	cbp-2
WBGene00010630	439.887	-7.03464	0.647683	-10.8612	1.76e-27	2.44e-26	ttll-15
WBGene00017703	20.2308	-7.03426	1.45608	-4.83095	1.36e-06	4.1e-06	F22E5.1
WBGene00009777	74.2448	-7.03325	1.08526	-6.48071	9.13e-11	4.1e-10	F46C3.2
WBGene00011099	222.76	-7.03275	0.671096	-10.4795	1.07e-25	1.35e-24	nhr-208
WBGene00206392	20.2013	-7.03203	1.3681	-5.13999	2.75e-07	8.85e-07	F47D2.11
WBGene00077522	20.1945	-7.03099	1.40354	-5.00946	5.46e-07	1.71e-06	T10D4.15
WBGene00008322	20.1749	-7.02998	1.34423	-5.22973	1.7e-07	5.59e-07	C55A1.4
WBGene00007340	298.262	-7.02962	0.661965	-10.6193	2.42e-26	3.16e-25	C05D12.2
WBGene00010525	195.492	-7.02643	1.17123	-5.99921	1.98e-09	7.94e-09	K03B8.8
WBGene00007233	180.145	-7.02626	0.878605	-7.99706	1.27e-15	8.5e-15	C01G10.6
WBGene00020593	599.288	-7.02596	0.640472	-10.97	5.33e-28	7.67e-27	ugt-11
WBGene00000695	72.1763	-7.02557	1.45711	-4.82158	1.42e-06	4.28e-06	col-121
WBGene00011583	20.0889	-7.02378	1.34399	-5.22605	1.73e-07	5.7e-07	T07D10.3
WBGene00011453	190.356	-7.01991	0.925104	-7.58824	3.24e-14	1.94e-13	ugt-56
WBGene00010854	20.0084	-7.01782	1.44135	-4.86892	1.12e-06	3.41e-06	M04C7.3
WBGene00021919	19.9976	-7.01635	1.38158	-5.07848	3.8e-07	1.21e-06	cutl-25
WBGene00010955	72.3046	-7.01149	1.09832	-6.3838	1.73e-10	7.56e-10	M199.7
WBGene00005724	19.9031	-7.00986	1.49387	-4.69241	2.7e-06	7.86e-06	srv-13
WBGene00013484	108.039	-7.00781	0.925543	-7.57156	3.69e-14	2.19e-13	Y69H2.9
WBGene00008830	179.149	-7.00613	0.749644	-9.34594	9.11e-21	8.45e-20	nhr-176
WBGene00010893	19.8529	-7.00565	1.49589	-4.68326	2.82e-06	8.2e-06	cutl-9
WBGene00001158	218.816	-7.00519	0.814327	-8.60242	7.81e-18	6.09e-17	ech-9
WBGene00000435	184.103	-7.00301	0.762861	-9.17992	4.31e-20	3.87e-19	ceh-10
WBGene00045246	19.735	-6.99728	1.42251	-4.91897	8.7e-07	2.68e-06	C29E4.15
WBGene00008640	238.202	-6.99478	2.1835	-3.20346	0.00135785	0.00278167	F10B5.3
WBGene00015820	19.6883	-6.99442	1.36015	-5.14237	2.71e-07	8.75e-07	C16A11.7
WBGene00012135	108.723	-6.99404	0.907556	-7.70646	1.29e-14	7.97e-14	T28F3.9
WBGene00012567	19.6554	-6.9926	1.40582	-4.97403	6.56e-07	2.04e-06	Y37H2A.7
WBGene00012091	19.6527	-6.99252	1.75215	-3.99083	6.58e-05	0.000162067	pals-29
WBGene00018558	19.6613	-6.99178	1.40433	-4.97875	6.4e-07	1.99e-06	srt-20
WBGene00009860	19.614	-6.98865	1.37764	-5.07292	3.92e-07	1.24e-06	clec-32
WBGene00011674	19.5701	-6.98565	1.53277	-4.55754	5.18e-06	1.45e-05	cyp-13A8
WBGene00045337	19.5613	-6.98521	1.34584	-5.19023	2.1e-07	6.86e-07	M01B2.12
WBGene00019506	19.5409	-6.98376	1.3739	-5.08317	3.71e-07	1.18e-06	K07H8.5
WBGene00012726	19.5051	-6.98094	1.38919	-5.02517	5.03e-07	1.58e-06	Y39G8B.5
WBGene00020138	106.093	-6.98017	0.904886	-7.71387	1.22e-14	7.54e-14	T01B11.1
WBGene00005258	19.4782	-6.97947	1.41009	-4.94967	7.43e-07	2.3e-06	srh-35
WBGene00050904	1327.48	-6.97901	0.421763	-16.5472	1.68e-61	1.43e-59	Y70C5A.3
WBGene00019388	175.08	-6.97881	0.86967	-8.02467	1.02e-15	6.83e-15	K04F1.9
WBGene00007424	211.268	-6.9779	0.668826	-10.433	1.75e-25	2.17e-24	C08B6.3
WBGene00005838	19.4131	-6.97451	1.43378	-4.86442	1.15e-06	3.49e-06	srw-91
WBGene00021087	19.4127	-6.97331	1.53866	-4.53206	5.84e-06	1.63e-05	W08E12.6
WBGene00009413	19.4042	-6.97321	1.39869	-4.98552	6.18e-07	1.93e-06	oac-19
WBGene00004813	19.4098	-6.97321	1.79739	-3.87963	0.000104617	0.00025077	skr-7
WBGene00044547	19.3736	-6.97181	1.47498	-4.7267	2.28e-06	6.7e-06	C13A2.12
WBGene00008044	380.371	-6.96825	0.62002	-11.2388	2.63e-29	4.07e-28	C40H1.9
WBGene00044531	19.2952	-6.96535	1.34606	-5.17462	2.28e-07	7.43e-07	F13A2.9
WBGene00019080	19.29	-6.96531	1.36114	-5.11725	3.1e-07	9.94e-07	F59A3.7
WBGene00044663	69.7697	-6.96329	1.15594	-6.02392	1.7e-09	6.85e-09	F26G1.10
WBGene00019578	19.2676	-6.96277	1.36995	-5.08249	3.73e-07	1.18e-06	K09E3.7
WBGene00013912	19.2494	-6.96208	1.37709	-5.05566	4.29e-07	1.36e-06	irld-19
WBGene00077599	19.2083	-6.95915	1.35048	-5.15308	2.56e-07	8.28e-07	T20F5.8
WBGene00013849	19.1985	-6.95749	1.54066	-4.51593	6.3e-06	1.75e-05	ZC84.6
WBGene00011800	108.378	-6.95568	1.1067	-6.28506	3.28e-10	1.4e-09	T16G1.6
WBGene00019150	19.1526	-6.9548	1.38844	-5.00907	5.47e-07	1.71e-06	H04J21.1
WBGene00008891	1286.97	-6.95255	0.540894	-12.8538	8.19e-38	2.03e-36	clec-42
WBGene00016365	178.934	-6.9514	0.809325	-8.58913	8.76e-18	6.81e-17	nhr-139
WBGene00005574	19.0714	-6.94859	1.38721	-5.00904	5.47e-07	1.71e-06	sri-62
WBGene00010200	591.396	-6.94673	0.617804	-11.2442	2.47e-29	3.83e-28	F57C7.4
WBGene00010495	19.0315	-6.94468	1.4881	-4.66681	3.06e-06	8.84e-06	K02B12.2
WBGene00008616	449.87	-6.94443	0.560731	-12.3846	3.17e-35	6.87e-34	fbxa-44
WBGene00044227	18.9813	-6.94118	1.48834	-4.66371	3.11e-06	8.97e-06	C07A9.13
WBGene00007310	18.9748	-6.94097	1.35652	-5.11675	3.11e-07	9.97e-07	irld-21
WBGene00020584	18.9024	-6.9357	1.34538	-5.15519	2.53e-07	8.19e-07	T19D12.10
WBGene00019273	381.841	-6.9345	0.855447	-8.10629	5.22e-16	3.57e-15	H43E16.1
WBGene00021653	18.8636	-6.93252	1.36268	-5.0874	3.63e-07	1.16e-06	Y47G6A.30
WBGene00012716	18.8518	-6.93148	1.45284	-4.771	1.83e-06	5.44e-06	Y39E4B.5
WBGene00019845	239.8	-6.93055	0.667069	-10.3896	2.77e-25	3.38e-24	irld-13
WBGene00270321	8244.02	-6.9294	2.03652	-3.40257	0.000667561	0.00142958	Y41C4A.32
WBGene00022532	177.829	-6.92865	0.881249	-7.86231	3.77e-15	2.42e-14	ZC155.4
WBGene00005053	18.8066	-6.92863	1.41991	-4.87961	1.06e-06	3.24e-06	sra-27
WBGene00019558	18.8053	-6.92803	1.42125	-4.87459	1.09e-06	3.32e-06	srbc-12
WBGene00005557	18.7377	-6.92265	1.36334	-5.0777	3.82e-07	1.21e-06	sri-45
WBGene00021297	18.6852	-6.91882	1.39547	-4.95806	7.12e-07	2.21e-06	fbxc-55
WBGene00016281	477.785	-6.91823	0.690646	-10.017	1.28e-23	1.42e-22	pals-32
WBGene00022561	18.6824	-6.91819	1.44267	-4.7954	1.62e-06	4.85e-06	btb-13
WBGene00017987	18.6619	-6.91672	1.36623	-5.06264	4.13e-07	1.31e-06	F32D1.8
WBGene00016108	569.781	-6.91649	0.740749	-9.33715	9.9e-21	9.18e-20	C25G6.3
WBGene00008789	18.6605	-6.91626	1.56939	-4.40697	1.05e-05	2.84e-05	F14D7.2
WBGene00015018	18.636	-6.91561	1.43379	-4.82331	1.41e-06	4.25e-06	srz-85
WBGene00012625	18.637	-6.91482	1.48377	-4.6603	3.16e-06	9.11e-06	Y38H6C.13
WBGene00015002	414.492	-6.91431	1.83419	-3.76969	0.000163451	0.000382156	B0034.1
WBGene00008809	18.6141	-6.91404	1.41366	-4.89087	1e-06	3.07e-06	cyp-13A11
WBGene00003850	1113.44	-6.9139	0.865577	-7.98761	1.38e-15	9.16e-15	odr-3
WBGene00006113	18.5782	-6.9105	1.35586	-5.09678	3.45e-07	1.1e-06	str-48
WBGene00015736	18.5478	-6.90774	1.60694	-4.29869	1.72e-05	4.55e-05	srsx-11
WBGene00002218	68.0218	-6.90443	1.09502	-6.30531	2.88e-10	1.23e-09	klp-6
WBGene00022246	344.44	-6.90425	0.626567	-11.0192	3.09e-28	4.52e-27	acp-7
WBGene00219456	18.4636	-6.90247	1.41334	-4.88381	1.04e-06	3.18e-06	ZK822.10
WBGene00021025	18.4529	-6.90016	1.51729	-4.54769	5.42e-06	1.52e-05	cutl-13
WBGene00017315	18.423	-6.89868	1.74445	-3.95465	7.66e-05	0.000186986	ugt-36
WBGene00016364	259.359	-6.89776	1.86421	-3.70009	0.000215523	0.000496023	nhr-161
WBGene00019058	166.207	-6.89719	0.787218	-8.76147	1.93e-18	1.56e-17	F58F9.4
WBGene00019764	171.063	-6.89468	0.768915	-8.96676	3.05e-19	2.59e-18	M03F8.5
WBGene00006642	467.863	-6.89094	0.582914	-11.8215	3.02e-32	5.59e-31	tsp-16
WBGene00011159	18.2983	-6.88952	1.8137	-3.79861	0.000145511	0.000342559	chil-17
WBGene00012043	18.2992	-6.88864	1.35582	-5.0808	3.76e-07	1.19e-06	irld-52
WBGene00003173	674.379	-6.88672	0.610845	-11.2741	1.76e-29	2.75e-28	mec-9
WBGene00009678	2618.65	-6.88482	0.327267	-21.0373	2.99e-98	1.73e-95	magu-4
WBGene00018545	18.243	-6.88462	1.45645	-4.72698	2.28e-06	6.69e-06	nhr-189
WBGene00015984	102.65	-6.88397	1.05899	-6.5005	8.01e-11	3.62e-10	C18G1.6
WBGene00006632	1018.02	-6.88257	0.834809	-8.24449	1.66e-16	1.17e-15	tsp-6
WBGene00008325	18.2162	-6.88203	1.3749	-5.00547	5.57e-07	1.74e-06	C55A1.9
WBGene00018653	18.1593	-6.87772	1.42943	-4.8115	1.5e-06	4.5e-06	F49H12.2
WBGene00194935	18.151	-6.87651	1.57987	-4.35257	1.35e-05	3.6e-05	M02G9.4
WBGene00005671	18.1461	-6.87627	1.47062	-4.67577	2.93e-06	8.48e-06	sru-8
WBGene00011512	336.115	-6.87429	0.768579	-8.94415	3.75e-19	3.15e-18	T05H10.8
WBGene00013938	100.382	-6.86759	0.963283	-7.12935	1.01e-12	5.35e-12	ZK218.4
WBGene00010761	17.9946	-6.86424	1.4327	-4.79114	1.66e-06	4.94e-06	K10H10.5
WBGene00015286	994.195	-6.86303	0.403092	-17.026	5.27e-65	5.32e-63	best-3
WBGene00019599	1014.21	-6.86095	0.422972	-16.2208	3.59e-59	2.73e-57	acds-10
WBGene00010602	17.9268	-6.85897	1.68998	-4.05862	4.94e-05	0.000123422	nhr-197
WBGene00021594	17.8946	-6.85736	1.76368	-3.8881	0.000101032	0.000242745	tig-3
WBGene00013293	17.9011	-6.85729	1.36523	-5.0228	5.09e-07	1.6e-06	Y57G11A.5
WBGene00020826	17.8994	-6.8568	1.35727	-5.0519	4.37e-07	1.38e-06	T26A8.3
WBGene00005189	17.8796	-6.85622	1.46915	-4.66679	3.06e-06	8.84e-06	srg-32
WBGene00005364	17.8826	-6.8558	1.42372	-4.81541	1.47e-06	4.41e-06	srh-148
WBGene00020015	161.341	-6.85547	0.76613	-8.94818	3.61e-19	3.05e-18	nhr-210
WBGene00010127	17.8567	-6.85382	1.42612	-4.80592	1.54e-06	4.61e-06	F55G11.7
WBGene00007954	17.8567	-6.85382	1.42612	-4.80592	1.54e-06	4.61e-06	gcp-2.2
WBGene00006657	723.518	-6.85168	0.833705	-8.21835	2.06e-16	1.45e-15	twk-2
WBGene00003854	17.8212	-6.85048	1.40129	-4.88869	1.02e-06	3.1e-06	odr-7
WBGene00000395	201.537	-6.85022	0.780476	-8.77697	1.68e-18	1.37e-17	cdh-3
WBGene00017312	100.86	-6.84949	1.11935	-6.11919	9.41e-10	3.86e-09	pitr-5
WBGene00019961	96.6547	-6.84918	0.940401	-7.28326	3.26e-13	1.8e-12	R08E5.1
WBGene00007813	17.8014	-6.84898	1.46446	-4.67681	2.91e-06	8.44e-06	jmjd-3.3
WBGene00011066	96.741	-6.84781	0.92991	-7.36395	1.79e-13	1.01e-12	ztf-15
WBGene00016046	392.687	-6.84275	0.596949	-11.4629	2.03e-30	3.35e-29	C24B5.4
WBGene00016585	195.198	-6.84258	0.715019	-9.56978	1.07e-21	1.06e-20	oac-59
WBGene00003877	2231.4	-6.84232	0.372703	-18.3586	2.82e-75	4.95e-73	pept-1
WBGene00020205	17.7256	-6.8421	1.48384	-4.61108	4.01e-06	1.14e-05	arrd-1
WBGene00015625	95.7026	-6.8401	1.0602	-6.45168	1.11e-10	4.93e-10	C09B8.8
WBGene00018865	17.6779	-6.83877	1.46201	-4.67763	2.9e-06	8.41e-06	F55A12.6
WBGene00010836	17.6507	-6.83745	1.39475	-4.90227	9.47e-07	2.9e-06	M03B6.4
WBGene00019423	17.5976	-6.83266	1.40676	-4.857	1.19e-06	3.61e-06	K05G3.2
WBGene00010916	17.5975	-6.83262	1.39439	-4.90007	9.58e-07	2.93e-06	M110.8
WBGene00004228	688.52	-6.83018	0.692292	-9.86605	5.84e-23	6.2e-22	ptr-14
WBGene00008977	309.052	-6.82746	0.952901	-7.16492	7.78e-13	4.17e-12	iglr-1
WBGene00005447	17.5446	-6.82738	1.45206	-4.70186	2.58e-06	7.53e-06	srh-240
WBGene00011431	17.5426	-6.82713	1.49746	-4.55915	5.14e-06	1.44e-05	T04D3.1
WBGene00007404	587.736	-6.82639	0.668819	-10.2066	1.85e-24	2.15e-23	best-5
WBGene00016644	333.213	-6.82637	1.87631	-3.63819	0.000274558	0.000621474	abhd-3.2
WBGene00005739	17.4449	-6.82022	1.41301	-4.82674	1.39e-06	4.18e-06	srv-28
WBGene00006065	17.4272	-6.81896	1.48852	-4.58103	4.63e-06	1.31e-05	sto-3
WBGene00012261	99.5808	-6.81728	1.21788	-5.59764	2.17e-08	7.88e-08	lpr-3
WBGene00189956	17.3777	-6.81507	1.44172	-4.72703	2.28e-06	6.69e-06	Y34F4.6
WBGene00012707	17.3841	-6.8145	1.43242	-4.75734	1.96e-06	5.81e-06	sre-16
WBGene00017784	17.364	-6.81363	1.50517	-4.52682	5.99e-06	1.67e-05	F25E5.3
WBGene00022028	17.3469	-6.81155	1.4276	-4.77133	1.83e-06	5.43e-06	Y65B4A.4
WBGene00013277	17.307	-6.80908	1.45735	-4.67223	2.98e-06	8.62e-06	sre-41
WBGene00022593	892.573	-6.80718	2.15242	-3.16257	0.00156381	0.00317128	ZC328.3
WBGene00007595	190.552	-6.80597	0.775652	-8.77452	1.72e-18	1.4e-17	C15A7.2
WBGene00005057	17.271	-6.8051	1.41081	-4.82355	1.41e-06	4.24e-06	sra-31
WBGene00011081	190.499	-6.80098	0.804536	-8.45329	2.83e-17	2.12e-16	R07B1.9
WBGene00006176	17.2075	-6.7993	1.62534	-4.18331	2.87e-05	7.39e-05	str-125
WBGene00010559	266.957	-6.79644	0.920778	-7.38119	1.57e-13	8.89e-13	K04D7.6
WBGene00009398	17.1552	-6.7949	1.58358	-4.29084	1.78e-05	4.7e-05	nspb-11
WBGene00013911	17.1343	-6.79324	1.44235	-4.70983	2.48e-06	7.25e-06	irld-60
WBGene00005249	17.1136	-6.79207	1.39473	-4.8698	1.12e-06	3.4e-06	srh-25
WBGene00010600	17.0734	-6.78881	1.46465	-4.63512	3.57e-06	1.02e-05	nhr-196
WBGene00007725	574.942	-6.78777	0.620911	-10.9319	8.11e-28	1.15e-26	C25F9.5
WBGene00008631	17.0577	-6.78687	1.49214	-4.54841	5.41e-06	1.51e-05	F10A3.1
WBGene00010047	6797.01	-6.78423	0.653909	-10.3749	3.23e-25	3.92e-24	F54D1.6
WBGene00005101	92.5678	-6.78298	0.920942	-7.36527	1.77e-13	9.97e-13	srd-23
WBGene00013996	525.445	-6.77967	0.577324	-11.7433	7.65e-32	1.38e-30	ZK550.2
WBGene00012591	239.494	-6.7794	1.07957	-6.27973	3.39e-10	1.44e-09	nspe-1
WBGene00007925	182.866	-6.77939	0.831436	-8.15383	3.53e-16	2.44e-15	C34C12.6
WBGene00019470	16.9284	-6.77667	1.9423	-3.489	0.000484835	0.00106087	cyp-35B3
WBGene00010023	16.9247	-6.77604	1.39917	-4.84289	1.28e-06	3.87e-06	srbc-51
WBGene00005182	16.9012	-6.77413	1.37777	-4.91674	8.8e-07	2.7e-06	srg-25
WBGene00006597	125.109	-6.77313	0.815455	-8.30596	9.9e-17	7.12e-16	tor-1
WBGene00018752	16.8856	-6.77287	1.39817	-4.84409	1.27e-06	3.84e-06	F53C3.8
WBGene00016337	16.8203	-6.76764	1.53598	-4.40609	1.05e-05	2.85e-05	fbxb-38
WBGene00009806	16.8199	-6.76659	1.45512	-4.65019	3.32e-06	9.54e-06	F47B8.5
WBGene00008884	16.8137	-6.76612	1.47477	-4.58791	4.48e-06	1.27e-05	nhr-281
WBGene00077751	16.7932	-6.76493	1.38199	-4.89507	9.83e-07	3.01e-06	irld-27
WBGene00005585	16.792	-6.76481	1.52238	-4.44356	8.85e-06	2.42e-05	sri-73
WBGene00005418	16.7763	-6.76333	1.61923	-4.17688	2.96e-05	7.58e-05	srh-208
WBGene00044376	16.7559	-6.7626	1.5449	-4.37738	1.2e-05	3.23e-05	Y49F6B.12
WBGene00001722	16.7596	-6.76162	1.73534	-3.89643	9.76e-05	0.000235079	grl-13
WBGene00017334	16.7359	-6.76087	1.48682	-4.54719	5.44e-06	1.52e-05	F10D2.8
WBGene00000295	335.338	-6.76029	0.52989	-12.7579	2.82e-37	6.75e-36	cat-1
WBGene00019957	3584.44	-6.75903	0.80671	-8.37851	5.36e-17	3.93e-16	R08E3.1
WBGene00010083	3106.8	-6.75552	0.49937	-13.5281	1.07e-41	3.25e-40	xdh-1
WBGene00021433	16.6766	-6.75547	1.46917	-4.59815	4.26e-06	1.21e-05	Y39A3A.2
WBGene00013403	16.6233	-6.75013	1.3763	-4.90456	9.36e-07	2.87e-06	fbxb-100
WBGene00015602	292.047	-6.74541	0.949648	-7.10306	1.22e-12	6.44e-12	fbxa-158
WBGene00017461	155.168	-6.74281	0.815409	-8.26923	1.35e-16	9.61e-16	bath-28
WBGene00009901	91.5414	-6.74114	0.919845	-7.32856	2.33e-13	1.3e-12	F49E12.8
WBGene00020280	530.298	-6.73577	0.761146	-8.84951	8.79e-19	7.26e-18	T06A1.5
WBGene00235309	89.2251	-6.73506	0.962806	-6.99524	2.65e-12	1.36e-11	F21C10.17
WBGene00001623	930.615	-6.73486	0.515457	-13.0658	5.16e-39	1.36e-37	glt-5
WBGene00271437	16.3901	-6.7299	1.38266	-4.86736	1.13e-06	3.44e-06	F10D2.16
WBGene00008123	356.778	-6.72396	0.504167	-13.3368	1.41e-40	4.07e-39	ent-4
WBGene00013028	90.8492	-6.7237	0.955744	-7.03505	1.99e-12	1.03e-11	efhc-1
WBGene00006782	219.606	-6.7237	0.863396	-7.7875	6.83e-15	4.3e-14	unc-46
WBGene00015901	145.166	-6.7236	1.03198	-6.51522	7.26e-11	3.29e-10	nhr-158
WBGene00015965	366.278	-6.72196	1.83246	-3.66828	0.00024419	0.000557271	ugt-48
WBGene00008212	16.3018	-6.72169	1.38261	-4.86161	1.16e-06	3.53e-06	C49F5.8
WBGene00011646	16.2649	-6.71898	1.43862	-4.67043	3.01e-06	8.7e-06	T09B9.5
WBGene00014156	16.2621	-6.71833	1.38333	-4.85662	1.19e-06	3.62e-06	ZK930.6
WBGene00015142	16.2624	-6.71777	1.51428	-4.43628	9.15e-06	2.5e-05	B0310.6
WBGene00008327	16.2574	-6.71758	1.52637	-4.40102	1.08e-05	2.92e-05	srz-44
WBGene00194803	87.9727	-6.71651	1.05193	-6.38492	1.71e-10	7.5e-10	C25F9.16
WBGene00018059	16.2302	-6.71621	1.49356	-4.49677	6.9e-06	1.91e-05	F35F10.10
WBGene00008654	1194.01	-6.71464	0.487894	-13.7625	4.29e-43	1.44e-41	pfas-1
WBGene00017433	184.721	-6.71094	0.843919	-7.95212	1.83e-15	1.21e-14	F13H6.5
WBGene00008728	16.176	-6.71063	1.38362	-4.85004	1.23e-06	3.74e-06	sre-36
WBGene00013485	116.723	-6.70947	0.905877	-7.4066	1.3e-13	7.4e-13	Y69H2.10
WBGene00019580	16.161	-6.70935	1.37597	-4.8761	1.08e-06	3.3e-06	oac-58
WBGene00010434	284.727	-6.70595	0.972137	-6.89815	5.27e-12	2.64e-11	H40L08.3
WBGene00017015	89.4529	-6.70558	0.929505	-7.21414	5.43e-13	2.94e-12	D1014.2
WBGene00007818	59.3764	-6.70555	1.09833	-6.10524	1.03e-09	4.2e-09	C30F2.4
WBGene00011520	461.383	-6.70513	0.539243	-12.4344	1.7e-35	3.75e-34	nhr-213
WBGene00043049	16.0939	-6.70315	1.53254	-4.37389	1.22e-05	3.28e-05	F32H2.11
WBGene00017785	293.872	-6.70287	0.651376	-10.2903	7.79e-25	9.27e-24	F25E5.4
WBGene00011517	814.149	-6.70186	0.774896	-8.64871	5.21e-18	4.11e-17	cgt-1
WBGene00007278	16.0662	-6.70073	1.53594	-4.36261	1.29e-05	3.45e-05	lab-1
WBGene00189987	16.035	-6.69883	1.43842	-4.65709	3.21e-06	9.25e-06	C18H7.12
WBGene00020637	16.0408	-6.69845	1.45359	-4.6082	4.06e-06	1.16e-05	fbxa-7
WBGene00044434	16.0315	-6.69825	1.43213	-4.67712	2.91e-06	8.43e-06	Y18H1A.15
WBGene00018805	16.0164	-6.69698	1.38618	-4.83125	1.36e-06	4.09e-06	F54D10.4
WBGene00000009	175.997	-6.69608	0.65994	-10.1465	3.43e-24	3.92e-23	aat-8
WBGene00011513	87.1639	-6.6953	0.920789	-7.27127	3.56e-13	1.96e-12	fbxa-197
WBGene00019231	58.056	-6.69477	1.11272	-6.0166	1.78e-09	7.16e-09	H23L24.4
WBGene00008985	86.9757	-6.6946	0.962354	-6.95648	3.49e-12	1.77e-11	F20G2.1
WBGene00012704	613.262	-6.69415	0.670446	-9.98462	1.78e-23	1.95e-22	mlt-3
WBGene00021215	144.129	-6.69334	0.835098	-8.01504	1.1e-15	7.37e-15	Y18H1A.11
WBGene00008564	682.076	-6.69177	0.661189	-10.1208	4.47e-24	5.06e-23	acox-1.1
WBGene00019617	4029.57	-6.69145	0.885599	-7.55585	4.16e-14	2.47e-13	ctsa-2
WBGene00013716	463.561	-6.69087	0.448536	-14.9171	2.55e-50	1.27e-48	Y106G6H.1
WBGene00005914	15.953	-6.69073	1.40752	-4.75356	2e-06	5.91e-06	srx-23
WBGene00009683	15.9118	-6.68717	1.37417	-4.86635	1.14e-06	3.46e-06	F44D12.6
WBGene00008633	15.898	-6.68527	1.4186	-4.71259	2.45e-06	7.16e-06	fbxa-18
WBGene00010693	15.8845	-6.68508	1.43911	-4.64528	3.4e-06	9.76e-06	K08H2.7
WBGene00011698	15.8768	-6.68464	1.47528	-4.53111	5.87e-06	1.64e-05	cyp-34A1
WBGene00004038	1170.35	-6.68288	0.399193	-16.741	6.59e-63	6.08e-61	plc-3
WBGene00020579	2438.47	-6.68127	0.452683	-14.7593	2.68e-49	1.24e-47	T19D12.4
WBGene00012372	142.489	-6.67882	0.809607	-8.24946	1.59e-16	1.13e-15	W09H1.1
WBGene00015899	15.8236	-6.67851	1.97666	-3.37868	0.000728336	0.00155118	C17E7.4
WBGene00005897	15.7882	-6.67578	1.63199	-4.09057	4.3e-05	0.000108336	srx-6
WBGene00001387	545.582	-6.67507	0.854816	-7.80878	5.77e-15	3.65e-14	far-3
WBGene00020981	690.6	-6.6744	0.748003	-8.92296	4.54e-19	3.81e-18	W03D2.6
WBGene00008796	15.7158	-6.66989	1.45642	-4.57965	4.66e-06	1.32e-05	F14D7.9
WBGene00013656	15.6811	-6.66585	1.38755	-4.80404	1.55e-06	4.65e-06	Y105C5B.17
WBGene00020765	314.672	-6.66367	0.550841	-12.0973	1.09e-33	2.18e-32	T24C12.3
WBGene00012698	15.6335	-6.66207	1.38633	-4.80555	1.54e-06	4.62e-06	sws-1
WBGene00012729	15.6284	-6.66162	1.38485	-4.81037	1.51e-06	4.52e-06	Y39G8B.10
WBGene00044906	15.6104	-6.65998	1.41021	-4.72269	2.33e-06	6.83e-06	Y67A10A.11
WBGene00005083	15.5732	-6.6565	1.55548	-4.27939	1.87e-05	4.93e-05	srd-5
WBGene00012012	15.5697	-6.65511	1.7842	-3.73003	0.000191456	0.000444083	T25B9.6
WBGene00010017	15.5428	-6.65329	1.46184	-4.55132	5.33e-06	1.49e-05	nhr-282
WBGene00005909	15.5433	-6.65326	1.38645	-4.79877	1.6e-06	4.77e-06	srx-18
WBGene00017586	15.5036	-6.65036	1.46453	-4.54096	5.6e-06	1.57e-05	F19B10.4
WBGene00009432	314.034	-6.64849	0.641386	-10.3658	3.55e-25	4.29e-24	cld-9
WBGene00018542	15.4615	-6.64602	1.382	-4.80898	1.52e-06	4.55e-06	nhr-187
WBGene00009561	15.4601	-6.64492	1.57546	-4.21778	2.47e-05	6.4e-05	F39D8.3
WBGene00019438	15.4473	-6.64474	1.41127	-4.70834	2.5e-06	7.3e-06	cyp-25A6
WBGene00044719	15.4573	-6.64465	1.4623	-4.54396	5.52e-06	1.54e-05	clec-172
WBGene00017666	15.454	-6.64421	1.6042	-4.14177	3.45e-05	8.77e-05	F21E9.2
WBGene00206485	15.4005	-6.64056	1.39921	-4.74594	2.08e-06	6.13e-06	C10A4.13
WBGene00195214	15.4044	-6.64053	1.3889	-4.78115	1.74e-06	5.18e-06	F11C1.10
WBGene00011545	393.29	-6.64044	0.498759	-13.3139	1.92e-40	5.5e-39	T06G6.3
WBGene00015711	15.3925	-6.63978	1.44038	-4.60974	4.03e-06	1.15e-05	C12D5.10
WBGene00012332	192.503	-6.63839	0.796904	-8.33023	8.07e-17	5.84e-16	rpi-1
WBGene00022408	15.3789	-6.63744	1.41215	-4.70025	2.6e-06	7.58e-06	srsx-3
WBGene00044211	57.4625	-6.63634	1.2426	-5.34069	9.26e-08	3.14e-07	Y60A3A.25
WBGene00009965	276.712	-6.63616	0.584004	-11.3632	6.38e-30	1.02e-28	frpr-9
WBGene00014062	15.3331	-6.63411	1.40672	-4.71601	2.41e-06	7.05e-06	ZK673.6
WBGene00010661	724.367	-6.63408	0.661561	-10.0279	1.15e-23	1.27e-22	tyr-2
WBGene00017840	226.035	-6.63349	0.602712	-11.0061	3.57e-28	5.21e-27	ttm-2
WBGene00013756	143.097	-6.63331	0.774623	-8.56327	1.1e-17	8.44e-17	ftr-1
WBGene00009433	682.148	-6.63174	0.700829	-9.4627	3e-21	2.87e-20	F35E12.9
WBGene00022353	1001.26	-6.63162	0.355184	-18.6709	8.53e-78	1.7e-75	pals-18
WBGene00021580	15.2863	-6.62943	1.66813	-3.97416	7.06e-05	0.000173089	clec-174
WBGene00010669	144.048	-6.62818	0.846025	-7.83449	4.71e-15	3e-14	bath-37
WBGene00001677	139.823	-6.62816	0.750358	-8.83333	1.02e-18	8.37e-18	gpa-15
WBGene00018896	15.2584	-6.62604	1.4877	-4.45387	8.43e-06	2.31e-05	F55F8.8
WBGene00015401	85.1407	-6.62601	0.972951	-6.81022	9.74e-12	4.77e-11	srsx-24
WBGene00017331	84.4974	-6.62525	0.916273	-7.23065	4.81e-13	2.62e-12	ugt-40
WBGene00003514	39404.1	-6.62483	0.333293	-19.8769	6.45e-88	2.59e-85	myo-2
WBGene00018050	84.9695	-6.62244	0.976472	-6.78201	1.19e-11	5.76e-11	clec-139
WBGene00018092	15.2048	-6.6209	1.94543	-3.40331	0.000665759	0.00142626	F36F12.1
WBGene00011657	15.1865	-6.62007	1.38261	-4.7881	1.68e-06	5.01e-06	T09E11.8
WBGene00236789	15.1809	-6.61956	1.38399	-4.78295	1.73e-06	5.14e-06	Y18H1A.18
WBGene00019683	15.1563	-6.61766	1.42316	-4.64997	3.32e-06	9.55e-06	K12H6.2
WBGene00021567	15.1684	-6.61762	1.55718	-4.24975	2.14e-05	5.59e-05	F56A4.5
WBGene00007448	15.1483	-6.61615	1.41011	-4.69194	2.71e-06	7.88e-06	C08F8.6
WBGene00001675	82.3907	-6.61326	0.918753	-7.19808	6.11e-13	3.3e-12	gpa-13
WBGene00002173	4970.34	-6.61269	0.388417	-17.0247	5.38e-65	5.41e-63	itr-1
WBGene00008075	15.1091	-6.61184	1.42724	-4.63261	3.61e-06	1.03e-05	C43F9.7
WBGene00011565	15.1029	-6.61128	1.43319	-4.61299	3.97e-06	1.13e-05	nhr-272
WBGene00005296	15.0878	-6.61105	1.41042	-4.6873	2.77e-06	8.05e-06	srh-75
WBGene00006598	15.0932	-6.61075	1.40639	-4.70051	2.6e-06	7.58e-06	tor-2
WBGene00021268	512.153	-6.61021	0.663009	-9.97002	2.06e-23	2.25e-22	capa-1
WBGene00013662	194.843	-6.60861	0.63956	-10.3331	4.99e-25	6e-24	Y105C5B.25
WBGene00019659	15.0506	-6.6063	1.62594	-4.06308	4.84e-05	0.000121156	K11H12.3
WBGene00021908	15.0391	-6.60537	1.40341	-4.70665	2.52e-06	7.36e-06	Y55B1AR.4
WBGene00011084	15.0312	-6.60452	1.68379	-3.92242	8.77e-05	0.000212235	srsx-21
WBGene00003558	1409.06	-6.60337	0.982963	-6.71782	1.84e-11	8.82e-11	nca-2
WBGene00012297	14.9878	-6.60064	1.3946	-4.73299	2.21e-06	6.51e-06	W06D4.3
WBGene00044381	14.9738	-6.59976	1.46269	-4.51206	6.42e-06	1.78e-05	K10G6.5
WBGene00016247	165.317	-6.59875	0.743114	-8.87986	6.69e-19	5.56e-18	C30B5.6
WBGene00001506	300.097	-6.59777	0.581265	-11.3507	7.36e-30	1.18e-28	fut-2
WBGene00005142	14.9269	-6.59503	1.39881	-4.71473	2.42e-06	7.09e-06	srd-65
WBGene00019214	14.9268	-6.59467	1.42818	-4.61754	3.88e-06	1.11e-05	H20E11.2
WBGene00010158	14.9302	-6.59443	1.67287	-3.94199	8.08e-05	0.00019646	pes-2.1
WBGene00003615	200.627	-6.59209	0.862328	-7.64453	2.1e-14	1.27e-13	nhr-16
WBGene00000906	351.767	-6.59169	0.543486	-12.1285	7.46e-34	1.5e-32	daf-10
WBGene00044353	80.2191	-6.59063	1.10961	-5.93959	2.86e-09	1.13e-08	ZK418.10
WBGene00003892	362.022	-6.58836	1.88965	-3.48655	0.000489288	0.00106999	osm-12
WBGene00008185	14.8499	-6.58791	1.40741	-4.68087	2.86e-06	8.29e-06	best-10
WBGene00009500	981.317	-6.58526	0.830406	-7.93018	2.19e-15	1.43e-14	F36H2.3
WBGene00017860	14.8041	-6.58327	1.38931	-4.73852	2.15e-06	6.34e-06	F27C1.13
WBGene00016696	14.7997	-6.58238	1.39048	-4.7339	2.2e-06	6.48e-06	srbc-19
WBGene00017398	587.286	-6.58189	0.482331	-13.646	2.13e-42	6.75e-41	slc-17.6
WBGene00016130	14.7959	-6.58145	1.66794	-3.94586	7.95e-05	0.000193526	C26B2.8
WBGene00019849	14.7827	-6.58057	1.47523	-4.4607	8.17e-06	2.24e-05	oac-40
WBGene00005123	14.7559	-6.57833	1.68036	-3.91484	9.05e-05	0.000218758	srd-45
WBGene00003977	14.7633	-6.57824	1.71842	-3.82806	0.000129156	0.000306136	pes-2.1
WBGene00011396	14.744	-6.57742	1.57565	-4.17442	2.99e-05	7.66e-05	nhr-271
WBGene00015054	14.7228	-6.57481	1.42678	-4.60816	4.06e-06	1.16e-05	pitr-2
WBGene00010540	1472.59	-6.57451	0.532793	-12.3397	5.54e-35	1.19e-33	K03H1.5
WBGene00019311	299.384	-6.57255	0.633589	-10.3735	3.27e-25	3.97e-24	K02E7.6
WBGene00012056	14.6807	-6.57161	1.44065	-4.56157	5.08e-06	1.43e-05	nhr-285
WBGene00003845	14.6769	-6.57052	1.51868	-4.32646	1.52e-05	4.03e-05	odd-1
WBGene00019389	53.9989	-6.5665	1.10215	-5.95789	2.56e-09	1.01e-08	irld-40
WBGene00009900	81.3226	-6.56481	0.940296	-6.98164	2.92e-12	1.49e-11	F49E12.7
WBGene00019057	454.22	-6.5644	1.94734	-3.37096	0.000749057	0.00159214	F58F9.3
WBGene00015851	14.6042	-6.56429	1.46746	-4.47324	7.7e-06	2.12e-05	C16C8.13
WBGene00011010	14.6102	-6.56314	1.65195	-3.97296	7.1e-05	0.000173831	R04D3.2
WBGene00009698	14.5985	-6.562	1.5499	-4.23383	2.3e-05	5.98e-05	F44F1.6
WBGene00044667	14.5753	-6.5605	1.45369	-4.51301	6.39e-06	1.77e-05	ZK622.5
WBGene00014052	79.0647	-6.55834	1.0044	-6.52961	6.59e-11	3e-10	ZK669.2
WBGene00003571	131.185	-6.55646	0.789186	-8.30787	9.74e-17	7.01e-16	ncx-6
WBGene00011339	382.617	-6.55505	0.661859	-9.90399	4e-23	4.29e-22	T01G5.1
WBGene00011537	55.3921	-6.55346	1.48992	-4.39852	1.09e-05	2.95e-05	T06E4.10
WBGene00011841	14.4935	-6.55271	1.42632	-4.59415	4.35e-06	1.23e-05	scl-25
WBGene00195154	14.4872	-6.55252	1.42917	-4.58484	4.54e-06	1.29e-05	F13A2.10
WBGene00008560	14.4935	-6.5519	1.42062	-4.612	3.99e-06	1.14e-05	pho-13
WBGene00022374	329.612	-6.55189	1.84425	-3.55261	0.00038143	0.000848239	nhr-277
WBGene00020882	14.4861	-6.55159	1.39109	-4.70967	2.48e-06	7.26e-06	T28A11.20
WBGene00000022	996.949	-6.54998	0.604757	-10.8308	2.46e-27	3.38e-26	abt-4
WBGene00021746	14.4545	-6.54861	1.39938	-4.67964	2.87e-06	8.33e-06	Y50D4B.7
WBGene00013939	14.4411	-6.54734	1.50358	-4.3545	1.33e-05	3.57e-05	ZK218.5
WBGene00003232	425.073	-6.54551	0.568888	-11.5058	1.23e-30	2.06e-29	mgl-1
WBGene00020128	339.503	-6.54438	0.723052	-9.05105	1.42e-19	1.23e-18	R193.2
WBGene00077762	14.4089	-6.54425	1.39384	-4.69514	2.66e-06	7.76e-06	Y57G11C.499
WBGene00009229	14.3773	-6.54077	1.39738	-4.68074	2.86e-06	8.29e-06	F28G4.4
WBGene00044403	280.353	-6.54066	0.951325	-6.87532	6.19e-12	3.08e-11	fbxa-219
WBGene00018913	14.3798	-6.54058	1.56691	-4.17418	2.99e-05	7.67e-05	F56A4.5
WBGene00005172	53.3508	-6.53702	1.17891	-5.54499	2.94e-08	1.05e-07	srg-15
WBGene00020004	14.3273	-6.53641	1.42103	-4.59976	4.23e-06	1.2e-05	R11E3.2
WBGene00018725	111.546	-6.53344	1.31522	-4.96756	6.78e-07	2.1e-06	kreg-1
WBGene00007311	14.2973	-6.5333	1.5376	-4.24902	2.15e-05	5.61e-05	C04H4.1
WBGene00001119	181.313	-6.53282	0.635319	-10.2827	8.43e-25	1e-23	dyf-3
WBGene00016109	192.358	-6.53221	0.853181	-7.6563	1.91e-14	1.17e-13	C25G6.4
WBGene00018544	51.4593	-6.53186	1.31423	-4.97011	6.69e-07	2.08e-06	nhr-188
WBGene00016517	14.2951	-6.53172	1.55995	-4.18714	2.82e-05	7.27e-05	nhr-260
WBGene00016877	150.404	-6.53079	1.35247	-4.8288	1.37e-06	4.14e-06	C52D10.3
WBGene00000491	672.783	-6.53045	0.485908	-13.4397	3.54e-41	1.05e-39	che-12
WBGene00020803	126.482	-6.53018	1.15599	-5.64901	1.61e-08	5.92e-08	T25E4.1
WBGene00005743	14.271	-6.52968	1.41675	-4.6089	4.05e-06	1.15e-05	srv-32
WBGene00017140	14.2668	-6.52927	1.41348	-4.61929	3.85e-06	1.1e-05	EEED8.12
WBGene00018280	275.699	-6.52897	0.967987	-6.74489	1.53e-11	7.36e-11	F41C6.7
WBGene00005484	14.2339	-6.52573	1.44903	-4.50353	6.68e-06	1.85e-05	srh-279
WBGene00010926	14.2341	-6.52558	1.81284	-3.59964	0.000318654	0.000715747	M153.3
WBGene00001672	128.599	-6.5249	0.762382	-8.55857	1.14e-17	8.77e-17	gpa-10
WBGene00017449	433.935	-6.52485	0.773177	-8.43901	3.2e-17	2.39e-16	otpl-3
WBGene00001721	14.2105	-6.52351	1.48243	-4.40054	1.08e-05	2.92e-05	grl-12
WBGene00022662	14.201	-6.52289	1.3997	-4.66021	3.16e-06	9.12e-06	ZK112.6
WBGene00007507	14.2004	-6.52237	1.56118	-4.17784	2.94e-05	7.56e-05	C10C5.3
WBGene00005584	14.1848	-6.52169	1.46273	-4.45858	8.25e-06	2.26e-05	sri-72
WBGene00009168	14.1901	-6.52142	1.42701	-4.56999	4.88e-06	1.38e-05	F26F2.3
WBGene00015478	622.732	-6.5212	0.410716	-15.8777	9.05e-57	6.07e-55	mapk-15
WBGene00012574	14.1773	-6.52106	1.41193	-4.61855	3.86e-06	1.1e-05	fbxa-213
WBGene00005968	14.1617	-6.51866	1.44214	-4.52014	6.18e-06	1.72e-05	srx-77
WBGene00005548	14.1638	-6.51859	1.59738	-4.08079	4.49e-05	0.000112682	sri-36
WBGene00005346	76.4844	-6.5178	1.06135	-6.14103	8.2e-10	3.38e-09	srh-129
WBGene00043997	129.574	-6.517	0.74961	-8.69386	3.5e-18	2.8e-17	Y79H2A.12
WBGene00005977	14.1427	-6.51679	1.41369	-4.60978	4.03e-06	1.15e-05	srx-86
WBGene00005383	14.1309	-6.51602	1.49818	-4.34929	1.37e-05	3.65e-05	srh-167
WBGene00013902	1576.82	-6.51523	0.272296	-23.927	1.6e-126	4.01e-123	ZC455.1
WBGene00044758	14.101	-6.51331	1.55075	-4.20011	2.67e-05	6.9e-05	Y37H2A.12
WBGene00005482	14.0726	-6.5107	1.46433	-4.4462	8.74e-06	2.39e-05	srh-277
WBGene00004107	14.0782	-6.50977	1.46922	-4.43077	9.39e-06	2.56e-05	pqn-16
WBGene00017228	14.0687	-6.50974	1.6639	-3.91233	9.14e-05	0.000220874	F07G11.1
WBGene00006748	223.423	-6.50879	0.951989	-6.83704	8.08e-12	3.98e-11	unc-8
WBGene00010224	51.1447	-6.50833	1.1092	-5.86761	4.42e-09	1.71e-08	F58A3.4
WBGene00005114	14.051	-6.50827	1.41654	-4.59447	4.34e-06	1.23e-05	srd-36
WBGene00018034	80.1967	-6.50692	1.18069	-5.51111	3.57e-08	1.26e-07	sek-5
WBGene00008630	14.0281	-6.50559	1.43042	-4.54804	5.41e-06	1.52e-05	nhr-175
WBGene00016927	14.0196	-6.50432	1.47687	-4.40412	1.06e-05	2.88e-05	nhr-172
WBGene00003531	14.0236	-6.50415	1.52602	-4.26216	2.02e-05	5.31e-05	nas-12
WBGene00001715	14.0165	-6.50331	1.57757	-4.12235	3.75e-05	9.51e-05	grl-6
WBGene00009964	100.748	-6.50154	0.934383	-6.9581	3.45e-12	1.75e-11	fip-6
WBGene00077455	13.9896	-6.50132	1.39635	-4.65595	3.22e-06	9.3e-06	Y69H2.17
WBGene00011568	13.971	-6.49949	1.42954	-4.54655	5.45e-06	1.53e-05	nhr-26
WBGene00017578	639.775	-6.49907	0.434469	-14.9587	1.37e-50	6.89e-49	drl-1
WBGene00009100	1083.16	-6.49897	0.341496	-19.0309	9.47e-81	2.42e-78	rgef-1
WBGene00021928	77.7585	-6.49895	0.942117	-6.89824	5.26e-12	2.64e-11	Y55F3AM.11
WBGene00016664	101.781	-6.49779	1.29111	-5.03273	4.84e-07	1.52e-06	C45E5.1
WBGene00044468	405.652	-6.49715	0.477743	-13.5997	4.02e-42	1.25e-40	Y69A2AL.2
WBGene00003645	584.404	-6.49684	2.0799	-3.12363	0.00178634	0.00358799	nhr-55
WBGene00016914	131.219	-6.49539	0.829861	-7.82708	4.99e-15	3.18e-14	C54D1.7
WBGene00016962	50.0541	-6.4933	1.47276	-4.40894	1.04e-05	2.82e-05	C56C10.4
WBGene00021778	50.5798	-6.49213	1.1096	-5.85086	4.89e-09	1.89e-08	Y51H7BR.7
WBGene00001616	1059.91	-6.49163	0.843568	-7.69544	1.41e-14	8.67e-14	glr-5
WBGene00022200	3621.72	-6.49107	0.346267	-18.7459	2.09e-78	4.53e-76	fard-1
WBGene00003717	13.897	-6.49092	1.64938	-3.93536	8.31e-05	0.000201655	nhr-127
WBGene00185092	204.714	-6.4896	0.607142	-10.6888	1.15e-26	1.53e-25	K08D8.7
WBGene00017108	383.264	-6.48745	1.89698	-3.41987	0.0006265	0.00134767	cyp-43A1
WBGene00004123	377.367	-6.48703	0.522429	-12.417	2.11e-35	4.63e-34	pqn-36
WBGene00019183	75.1714	-6.48686	0.983562	-6.59528	4.24e-11	1.96e-10	npr-30
WBGene00016525	13.8206	-6.48417	1.40166	-4.62608	3.73e-06	1.07e-05	fbxa-12
WBGene00194888	13.8241	-6.48362	1.43731	-4.51096	6.45e-06	1.79e-05	K10H10.13
WBGene00015969	555.492	-6.48227	0.405246	-15.9959	1.36e-57	9.54e-56	glb-6
WBGene00005959	13.7894	-6.48115	1.5828	-4.09475	4.23e-05	0.000106578	srx-68
WBGene00020766	13.7979	-6.48072	1.48043	-4.37758	1.2e-05	3.23e-05	T24C12.4
WBGene00009023	495.795	-6.47957	0.516707	-12.5401	4.5e-36	1.02e-34	F21G4.1
WBGene00022243	13.777	-6.47932	1.42096	-4.55983	5.12e-06	1.44e-05	Y73B6BL.22
WBGene00011712	13.7734	-6.47927	1.51237	-4.2842	1.83e-05	4.84e-05	T11F9.10
WBGene00008784	13.7785	-6.47861	1.54787	-4.1855	2.85e-05	7.32e-05	F14B6.3
WBGene00006674	76.9319	-6.47861	0.96902	-6.68574	2.3e-11	1.09e-10	twk-21
WBGene00008599	427.305	-6.47809	0.49837	-12.9986	1.25e-38	3.22e-37	F09A5.2
WBGene00018591	74.6475	-6.47323	0.945511	-6.84628	7.58e-12	3.75e-11	npax-2
WBGene00005300	13.6955	-6.47117	1.41149	-4.58463	4.55e-06	1.29e-05	srh-79
WBGene00018279	13.6904	-6.47066	1.41145	-4.58441	4.55e-06	1.29e-05	F41C6.6
WBGene00044489	74.6712	-6.47014	0.924106	-7.00151	2.53e-12	1.3e-11	pudl-1
WBGene00044790	76.0505	-6.46945	0.926669	-6.9814	2.92e-12	1.49e-11	clec-224
WBGene00219410	13.6819	-6.46933	1.40239	-4.61309	3.97e-06	1.13e-05	C04C3.14
WBGene00008790	13.6686	-6.46846	1.42024	-4.55448	5.25e-06	1.47e-05	F14D7.3
WBGene00009914	13.674	-6.46813	1.44506	-4.47601	7.6e-06	2.09e-05	F49H6.13
WBGene00011768	995.87	-6.46801	0.471996	-13.7035	9.67e-43	3.15e-41	oac-46
WBGene00011803	169.15	-6.46733	1.04071	-6.21434	5.15e-10	2.16e-09	T16G12.1
WBGene00004011	156.522	-6.46715	0.855693	-7.55779	4.1e-14	2.43e-13	pha-2
WBGene00006215	13.6498	-6.46584	1.89709	-3.40829	0.000653721	0.00140181	str-171
WBGene00005219	13.64	-6.46544	1.65286	-3.91167	9.17e-05	0.000221457	srg-62
WBGene00020062	74.2137	-6.4645	0.978115	-6.60914	3.87e-11	1.79e-10	nhr-270
WBGene00011612	13.617	-6.46279	1.43322	-4.50926	6.51e-06	1.8e-05	T08D2.7
WBGene00006190	13.6058	-6.46214	1.64588	-3.92624	8.63e-05	0.000209048	str-143
WBGene00010134	1430.83	-6.46153	0.403448	-16.0158	9.92e-58	7e-56	F55H12.3
WBGene00005169	13.6036	-6.46025	1.48478	-4.35097	1.36e-05	3.63e-05	srg-11
WBGene00005105	13.5772	-6.45908	1.70361	-3.7914	0.0001498	0.000352066	srd-27
WBGene00002274	280.615	-6.45742	0.722504	-8.93756	3.98e-19	3.34e-18	lec-11
WBGene00000972	73.1797	-6.45669	1.11186	-5.80709	6.36e-09	2.43e-08	dhs-8
WBGene00015701	176.001	-6.45558	0.677164	-9.53326	1.52e-21	1.49e-20	C11D2.3
WBGene00015426	13.5498	-6.4551	1.51175	-4.26994	1.96e-05	5.14e-05	C04E6.12
WBGene00008656	659.711	-6.455	0.859843	-7.50718	6.04e-14	3.53e-13	lron-5
WBGene00020698	247.14	-6.45461	0.615388	-10.4887	9.74e-26	1.23e-24	T22F3.8
WBGene00008669	2050.55	-6.45459	0.31853	-20.2637	2.69e-91	1.21e-88	acs-14
WBGene00019091	13.5405	-6.45408	1.43175	-4.50783	6.55e-06	1.82e-05	srab-13
WBGene00021017	149.06	-6.45405	0.6743	-9.57148	1.05e-21	1.04e-20	cil-7
WBGene00005241	13.5315	-6.45364	1.45498	-4.43556	9.18e-06	2.51e-05	srh-16
WBGene00012788	13.5313	-6.45362	1.44565	-4.46416	8.04e-06	2.21e-05	Y43D4A.2
WBGene00019317	252.256	-6.45344	0.616653	-10.4653	1.25e-25	1.56e-24	K02E10.1
WBGene00013857	127.203	-6.45308	0.814252	-7.92516	2.28e-15	1.49e-14	orc-5
WBGene00020494	49.1068	-6.45001	1.12552	-5.73068	1e-08	3.74e-08	T13G4.7
WBGene00020634	148.792	-6.44992	0.675285	-9.55142	1.28e-21	1.26e-20	acs-9
WBGene00019978	1340.99	-6.44967	0.946919	-6.81122	9.68e-12	4.74e-11	hacd-1
WBGene00005063	75.2121	-6.44898	0.950741	-6.78311	1.18e-11	5.72e-11	sra-37
WBGene00000082	129.391	-6.44858	0.981797	-6.56813	5.1e-11	2.34e-10	adt-1
WBGene00013466	13.4866	-6.44818	1.46658	-4.39676	1.1e-05	2.97e-05	srz-47
WBGene00011163	13.4773	-6.448	1.51361	-4.26	2.04e-05	5.36e-05	chil-20
WBGene00017399	13.4835	-6.44752	1.48515	-4.34132	1.42e-05	3.78e-05	lgc-51
WBGene00016821	13.4625	-6.44695	1.76487	-3.65293	0.00025927	0.000589178	scl-26
WBGene00016559	169.846	-6.44662	0.740863	-8.7015	3.28e-18	2.62e-17	C41A3.2
WBGene00012285	13.4614	-6.44643	1.44736	-4.45391	8.43e-06	2.31e-05	pitr-6
WBGene00044780	13.4605	-6.44595	1.41433	-4.5576	5.17e-06	1.45e-05	F18E9.8
WBGene00194677	13.4425	-6.4441	1.40715	-4.57954	4.66e-06	1.32e-05	D1054.19
WBGene00006686	492.918	-6.44381	0.71689	-8.98857	2.5e-19	2.14e-18	twk-34
WBGene00002055	14211.5	-6.44306	0.346741	-18.5818	4.51e-77	8.68e-75	ifc-1
WBGene00269373	13.4386	-6.44269	1.54088	-4.18117	2.9e-05	7.45e-05	M01D1.12
WBGene00202514	13.4227	-6.44206	1.43974	-4.47445	7.66e-06	2.11e-05	T09F5.20
WBGene00009101	197.543	-6.44191	0.755382	-8.52802	1.49e-17	1.14e-16	F25B3.4
WBGene00003939	72.7675	-6.44015	0.9972	-6.45823	1.06e-10	4.73e-10	pax-3
WBGene00009427	13.4063	-6.43909	1.57945	-4.07678	4.57e-05	0.000114538	fbxa-181
WBGene00020460	74.7415	-6.43863	0.957162	-6.72679	1.73e-11	8.3e-11	nhr-273
WBGene00010492	13.3937	-6.43774	1.67821	-3.83607	0.000125017	0.000296982	meg-1
WBGene00000086	1549.18	-6.43455	0.687315	-9.36187	7.83e-21	7.31e-20	aex-3
WBGene00011077	13.3625	-6.43441	1.5411	-4.17519	2.98e-05	7.64e-05	R07B1.5
WBGene00004255	298.084	-6.43334	1.8713	-3.4379	0.000586237	0.00126711	epac-1
WBGene00019345	243.963	-6.43145	0.647895	-9.92668	3.19e-23	3.44e-22	tmem-135
WBGene00008710	211.992	-6.42787	0.884874	-7.26417	3.75e-13	2.06e-12	F11E6.7
WBGene00010121	13.2801	-6.42687	1.42912	-4.49707	6.89e-06	1.9e-05	F55G7.3
WBGene00007695	212.077	-6.42678	0.86039	-7.46961	8.04e-14	4.66e-13	C23H4.7
WBGene00018594	338.184	-6.42605	0.657611	-9.77181	1.49e-22	1.54e-21	aman-3
WBGene00000963	1076.16	-6.42554	0.717648	-8.9536	3.44e-19	2.91e-18	dhp-1
WBGene00008795	72.3467	-6.42489	0.937756	-6.85134	7.32e-12	3.62e-11	F14D7.8
WBGene00016477	13.261	-6.42477	1.47475	-4.35651	1.32e-05	3.54e-05	srab-11
WBGene00007513	647.521	-6.42015	0.434396	-14.7795	1.99e-49	9.3e-48	wht-2
WBGene00016016	13.2142	-6.4186	1.43818	-4.46299	8.08e-06	2.22e-05	C23G10.10
WBGene00008194	6228.37	-6.41725	0.557647	-11.5077	1.21e-30	2.02e-29	C49C3.4
WBGene00018312	13.2	-6.41714	1.68842	-3.80068	0.0001443	0.000339916	F41H8.1
WBGene00000061	387.596	-6.41597	1.92956	-3.32509	0.000883893	0.00186187	lgc-11
WBGene00044347	13.1595	-6.41357	1.61416	-3.97333	7.09e-05	0.000173622	Y71G12B.30
WBGene00001674	908.929	-6.41264	0.882418	-7.26713	3.67e-13	2.02e-12	gpa-12
WBGene00219236	13.1522	-6.41208	1.42674	-4.49422	6.98e-06	1.93e-05	K03B4.9
WBGene00008647	13.1338	-6.41065	1.42482	-4.49927	6.82e-06	1.89e-05	F10C2.7
WBGene00011587	475.427	-6.4097	0.470843	-13.6132	3.34e-42	1.05e-40	anp-1
WBGene00009606	13.1268	-6.40882	2.01908	-3.17412	0.00150289	0.00305682	F40G12.11
WBGene00007482	454.299	-6.40603	2.03882	-3.14202	0.00167785	0.00338462	C09F12.2
WBGene00077514	13.0964	-6.40593	1.56806	-4.08526	4.4e-05	0.000110661	F07B10.7
WBGene00021709	766.722	-6.40494	0.658956	-9.71983	2.48e-22	2.54e-21	ugt-29
WBGene00003377	98.8223	-6.40471	0.941294	-6.80415	1.02e-11	4.97e-11	mls-2
WBGene00010779	13.076	-6.4041	1.40973	-4.54279	5.55e-06	1.55e-05	K11H3.2
WBGene00022508	13.0676	-6.40236	1.47372	-4.34435	1.4e-05	3.73e-05	ZC53.1
WBGene00018640	13.0502	-6.40023	1.62518	-3.93816	8.21e-05	0.000199432	F49E10.2
WBGene00000431	350.529	-6.39987	0.553432	-11.564	6.27e-31	1.07e-29	ceh-6
WBGene00011182	2633.97	-6.39971	1.67243	-3.8266	0.000129926	0.000307864	R09H10.5
WBGene00016931	71.0333	-6.39855	0.945853	-6.76484	1.33e-11	6.46e-11	C54G6.2
WBGene00044801	25.6647	-6.3971	1.37265	-4.66041	3.16e-06	9.11e-06	ZC262.9
WBGene00009856	70.7892	-6.39698	0.956458	-6.6882	2.26e-11	1.07e-10	clec-24
WBGene00005611	13.0152	-6.39662	1.86686	-3.42641	0.000611625	0.00131819	srj-23
WBGene00012026	13.0077	-6.39641	1.42251	-4.49658	6.91e-06	1.91e-05	srz-100
WBGene00194928	70.491	-6.3953	1.01656	-6.29112	3.15e-10	1.35e-09	ZC513.14
WBGene00005417	13.0031	-6.39515	1.50142	-4.25938	2.05e-05	5.37e-05	srh-207
WBGene00012255	74.3812	-6.39466	1.19411	-5.35515	8.55e-08	2.91e-07	lpr-6
WBGene00015262	47.177	-6.39463	1.14986	-5.56121	2.68e-08	9.61e-08	B0563.5
WBGene00001211	263.86	-6.39302	0.579033	-11.0409	2.43e-28	3.57e-27	egl-47
WBGene00012914	12.9795	-6.39271	1.53033	-4.17734	2.95e-05	7.57e-05	bcmo-1
WBGene00005257	12.9669	-6.39206	1.42574	-4.48333	7.35e-06	2.02e-05	srh-34
WBGene00018468	2808.22	-6.39151	0.701583	-9.11012	8.23e-20	7.28e-19	cla-1
WBGene00017968	1349.59	-6.39134	0.654157	-9.77034	1.51e-22	1.56e-21	skpo-3
WBGene00017173	12.9488	-6.39086	1.6072	-3.9764	7e-05	0.000171586	F02C9.2
WBGene00002915	7608.04	-6.3901	0.627076	-10.1903	2.19e-24	2.53e-23	let-805
WBGene00021083	12.9379	-6.38787	1.6633	-3.84049	0.000122791	0.00029197	W08E12.2
WBGene00012018	12074	-6.38777	0.586827	-10.8853	1.36e-27	1.9e-26	T25C12.3
WBGene00015842	70.3326	-6.38716	0.952318	-6.70696	1.99e-11	9.47e-11	C16C8.4
WBGene00016189	12.9288	-6.3871	1.45793	-4.38095	1.18e-05	3.18e-05	C28G1.4
WBGene00013873	12.9212	-6.38625	1.44761	-4.41158	1.03e-05	2.79e-05	ZC376.1
WBGene00016005	212.512	-6.38563	0.596944	-10.6972	1.05e-26	1.4e-25	ift-74
WBGene00018267	12.9004	-6.38485	1.79271	-3.56156	0.000368654	0.000820527	F41C3.1
WBGene00194916	12.8927	-6.38368	1.41187	-4.52143	6.14e-06	1.71e-05	F35D2.6
WBGene00007957	956.122	-6.381	0.774095	-8.24318	1.68e-16	1.18e-15	C35C5.8
WBGene00010603	12.8697	-6.38079	1.52102	-4.19508	2.73e-05	7.04e-05	nhr-198
WBGene00044575	12.8628	-6.37999	1.43168	-4.45629	8.34e-06	2.29e-05	F38B6.8
WBGene00009338	12.8303	-6.3774	1.46716	-4.34676	1.38e-05	3.69e-05	F32G8.2
WBGene00016893	12.8307	-6.37701	1.44821	-4.40337	1.07e-05	2.89e-05	C53B7.2
WBGene00022012	211.885	-6.37599	0.579076	-11.0106	3.4e-28	4.96e-27	Y59H11AR.4
WBGene00005174	12.8272	-6.37532	1.59133	-4.00629	6.17e-05	0.000152339	srg-17
WBGene00022780	12.8178	-6.37471	1.4678	-4.34303	1.41e-05	3.75e-05	ZK622.1
WBGene00044564	12.8172	-6.37428	1.84876	-3.44787	0.000565021	0.00122537	ZK813.6
WBGene00007844	71.4829	-6.37372	0.955431	-6.67105	2.54e-11	1.2e-10	irld-24
WBGene00019615	1045.88	-6.37103	0.321668	-19.8062	2.63e-87	1.02e-84	K10B4.3
WBGene00018102	275.821	-6.37065	0.585696	-10.8771	1.48e-27	2.06e-26	math-28
WBGene00010111	773.154	-6.37017	0.566917	-11.2365	2.7e-29	4.17e-28	F55D12.2
WBGene00018375	124.12	-6.36758	1.14053	-5.58298	2.36e-08	8.54e-08	F43C9.1
WBGene00006981	439.809	-6.36706	0.744426	-8.55297	1.2e-17	9.2e-17	zig-4
WBGene00011986	12.7334	-6.36603	1.45369	-4.37922	1.19e-05	3.21e-05	T24D1.3
WBGene00008732	200.642	-6.36269	1.18247	-5.38084	7.41e-08	2.54e-07	F13B12.4
WBGene00007649	12.7114	-6.36268	1.43787	-4.42507	9.64e-06	2.62e-05	C17G1.2
WBGene00007598	71.2195	-6.36262	0.985502	-6.45622	1.07e-10	4.79e-10	C15A11.4
WBGene00013711	588.259	-6.36089	0.95499	-6.66069	2.73e-11	1.28e-10	Y106G6G.2
WBGene00016772	12.6869	-6.35972	1.50098	-4.23704	2.26e-05	5.9e-05	nhr-166
WBGene00020326	68.9863	-6.35824	0.941359	-6.75432	1.44e-11	6.92e-11	math-38
WBGene00012217	12.6489	-6.35589	1.46288	-4.34476	1.39e-05	3.73e-05	W02H3.1
WBGene00009342	6017.22	-6.35568	0.576898	-11.017	3.16e-28	4.63e-27	fasn-1
WBGene00016872	139.316	-6.35439	0.689178	-9.22025	2.96e-20	2.67e-19	dop-4
WBGene00000108	12.6124	-6.35271	2.00177	-3.17354	0.00150593	0.00306245	alh-2
WBGene00044014	12.6045	-6.35196	1.80279	-3.5234	0.000426044	0.000939994	F15H10.10
WBGene00189995	12.6127	-6.35103	1.82178	-3.48616	0.000490011	0.00107136	C06E7.88
WBGene00012743	12.5888	-6.34989	1.58386	-4.00912	6.09e-05	0.000150592	Y40H7A.2
WBGene00022469	249.1	-6.34984	0.604502	-10.5043	8.26e-26	1.04e-24	Y119C1B.3
WBGene00017648	12.556	-6.34574	1.43858	-4.4111	1.03e-05	2.79e-05	ddo-3
WBGene00003174	185.61	-6.34396	0.616976	-10.2824	8.46e-25	1e-23	mec-10
WBGene00008163	12.5349	-6.34217	1.51387	-4.18937	2.8e-05	7.21e-05	C47F8.7
WBGene00007268	46.5051	-6.34027	1.15147	-5.50623	3.67e-08	1.29e-07	C03A3.3
WBGene00016488	69.6877	-6.33939	0.940471	-6.74066	1.58e-11	7.57e-11	C36C9.5
WBGene00021198	12.4922	-6.33869	1.46337	-4.33158	1.48e-05	3.94e-05	npp-26
WBGene00194682	12.4817	-6.33658	1.48798	-4.25851	2.06e-05	5.39e-05	F40D4.17
WBGene00019112	12.471	-6.33626	1.50538	-4.20908	2.56e-05	6.64e-05	F59E11.6
WBGene00023463	12.4638	-6.33506	1.45691	-4.34828	1.37e-05	3.67e-05	srz-82
WBGene00012542	12.4539	-6.33401	1.42958	-4.43066	9.39e-06	2.56e-05	irld-56
WBGene00010606	12.4625	-6.334	1.47677	-4.28908	1.79e-05	4.73e-05	cyp-13B2
WBGene00006589	7616.77	-6.33256	0.32982	-19.2001	3.7e-82	1.03e-79	tnt-4
WBGene00006429	12.4493	-6.33216	1.61788	-3.91386	9.08e-05	0.000219617	arrd-3
WBGene00011011	12.4471	-6.33212	1.97698	-3.20292	0.00136041	0.00278614	R04D3.3
WBGene00005551	12.4462	-6.33188	1.76154	-3.59452	0.000324989	0.000729031	sri-39
WBGene00020948	71.2462	-6.33109	1.19906	-5.28004	1.29e-07	4.31e-07	era-1
WBGene00012846	12.4272	-6.33051	1.45499	-4.35091	1.36e-05	3.63e-05	srxa-14
WBGene00003410	494.947	-6.32714	0.483751	-13.0793	4.32e-39	1.14e-37	mrp-4
WBGene00013585	251.399	-6.32662	1.79997	-3.51486	0.000439992	0.000969221	cyp-42A1
WBGene00005273	12.3787	-6.32514	1.42872	-4.42712	9.55e-06	2.6e-05	srh-50
WBGene00016480	12.3637	-6.32349	1.43383	-4.4102	1.03e-05	2.8e-05	srab-7
WBGene00017941	12.3628	-6.3234	1.42634	-4.43329	9.28e-06	2.53e-05	F31A9.2
WBGene00000439	183.145	-6.323	0.626774	-10.0882	6.23e-24	7e-23	ceh-16
WBGene00005164	12.3497	-6.32185	1.5363	-4.11499	3.87e-05	9.81e-05	srg-6
WBGene00017802	12.359	-6.32172	1.65017	-3.83096	0.000127646	0.000302715	F26A1.3
WBGene00020149	1096.12	-6.31958	1.86597	-3.38676	0.000707235	0.0015098	T01D1.4
WBGene00012565	182.868	-6.31816	0.649082	-9.734	2.16e-22	2.22e-21	fbxa-210
WBGene00015320	12.3031	-6.31618	1.43657	-4.39672	1.1e-05	2.97e-05	C02B8.1
WBGene00006538	682.732	-6.31589	0.783284	-8.06335	7.42e-16	5.04e-15	tbb-4
WBGene00013839	115.681	-6.31559	0.807516	-7.82102	5.24e-15	3.33e-14	fbxa-32
WBGene00015843	67.0405	-6.31554	0.933228	-6.76741	1.31e-11	6.35e-11	C16C8.5
WBGene00007809	133.416	-6.3145	0.758709	-8.3227	8.6e-17	6.21e-16	C29F4.3
WBGene00007204	12.28	-6.31356	1.48222	-4.25953	2.05e-05	5.37e-05	best-2
WBGene00019799	12.2741	-6.31198	1.47561	-4.27754	1.89e-05	4.97e-05	M151.7
WBGene00018972	12.2644	-6.31138	1.47779	-4.27083	1.95e-05	5.12e-05	srz-19
WBGene00005686	12.2638	-6.3113	1.45809	-4.32847	1.5e-05	4e-05	sru-23
WBGene00044977	204.827	-6.30828	0.618576	-10.1981	2.02e-24	2.34e-23	F56C4.4
WBGene00002297	109.983	-6.30612	0.861153	-7.32288	2.43e-13	1.35e-12	ect-2
WBGene00007440	1525.37	-6.30547	0.626184	-10.0697	7.52e-24	8.39e-23	C08E8.4
WBGene00015288	194.781	-6.30449	0.887933	-7.10019	1.25e-12	6.56e-12	best-4
WBGene00018205	12.2	-6.30408	1.55894	-4.04382	5.26e-05	0.0001309	F39F10.5
WBGene00008615	110.469	-6.30184	0.787279	-8.00459	1.2e-15	8e-15	F09C6.1
WBGene00016532	216.409	-6.30138	1.01277	-6.22195	4.91e-10	2.06e-09	C39D10.5
WBGene00017039	897.118	-6.29948	0.834547	-7.54838	4.41e-14	2.61e-13	trk-1
WBGene00009099	12.1401	-6.29774	1.85275	-3.39914	0.000675982	0.00144651	F25B3.2
WBGene00010808	12.1546	-6.29773	1.68523	-3.73701	0.00018622	0.000432649	sepa-1
WBGene00008301	402.769	-6.29751	0.774246	-8.13374	4.16e-16	2.87e-15	pals-39
WBGene00005184	12.1478	-6.29726	1.51852	-4.14697	3.37e-05	8.59e-05	srg-27
WBGene00007833	65.5422	-6.29561	1.21281	-5.19094	2.09e-07	6.83e-07	oac-6
WBGene00269434	255.257	-6.2947	1.79814	-3.50067	0.000464088	0.00101844	sqst-5
WBGene00012541	12.1139	-6.29442	1.59423	-3.94826	7.87e-05	0.00019172	irld-55
WBGene00011893	1303.07	-6.2944	0.746683	-8.42981	3.46e-17	2.58e-16	T21C9.6
WBGene00001773	12.1151	-6.29395	1.6376	-3.84341	0.000121338	0.000288698	gst-25
WBGene00001581	19002.7	-6.29301	0.477275	-13.1853	1.07e-39	2.91e-38	gfi-1
WBGene00011209	109.908	-6.29093	0.729702	-8.62124	6.62e-18	5.2e-17	R10E8.3
WBGene00005524	12.0619	-6.28789	1.46513	-4.29168	1.77e-05	4.68e-05	sri-12
WBGene00022735	151.16	-6.28701	0.810561	-7.75637	8.74e-15	5.45e-14	ZK418.6
WBGene00006809	1244.37	-6.2863	0.398566	-15.7723	4.83e-56	3.11e-54	unc-77
WBGene00045497	44.5297	-6.28055	1.13152	-5.55053	2.85e-08	1.02e-07	K03A11.6
WBGene00019508	11.9999	-6.27978	1.47702	-4.25166	2.12e-05	5.55e-05	K07H8.8
WBGene00022419	262.609	-6.27756	0.504574	-12.4413	1.56e-35	3.45e-34	Y102A11A.9
WBGene00006532	108.06	-6.27037	0.795637	-7.88094	3.25e-15	2.1e-14	tba-6
WBGene00194821	11.9134	-6.27028	1.45809	-4.30034	1.71e-05	4.51e-05	dmsr-16
WBGene00011388	11.9202	-6.26972	1.52903	-4.10047	4.12e-05	0.000104106	T02G6.5
WBGene00044034	112.603	-6.26873	0.845016	-7.41848	1.18e-13	6.79e-13	Y38E10A.28
WBGene00044031	11.9012	-6.26836	1.48245	-4.22838	2.35e-05	6.12e-05	F49C5.9
WBGene00019653	172.144	-6.26375	0.612317	-10.2296	1.46e-24	1.7e-23	K11G9.2
WBGene00005265	11.8653	-6.26367	1.5175	-4.12763	3.67e-05	9.3e-05	srh-42
WBGene00011923	311.117	-6.26295	0.597653	-10.4792	1.08e-25	1.35e-24	chhy-1
WBGene00021560	66.0599	-6.26181	0.93641	-6.68703	2.28e-11	1.08e-10	coh-4
WBGene00005745	11.8348	-6.25963	1.49258	-4.19383	2.74e-05	7.08e-05	srv-34
WBGene00002177	307.275	-6.25837	1.8659	-3.35407	0.000796314	0.0016867	jkk-1
WBGene00005375	11.8193	-6.25776	1.45625	-4.29718	1.73e-05	4.58e-05	srh-159
WBGene00009903	113.735	-6.25654	1.0071	-6.21244	5.22e-10	2.18e-09	F49E12.10
WBGene00005415	11.7967	-6.25594	1.58535	-3.94609	7.94e-05	0.000193382	srh-204
WBGene00045036	11.7938	-6.25582	1.47387	-4.24449	2.19e-05	5.71e-05	K08E4.7
WBGene00016219	669.493	-6.25536	0.737936	-8.47683	2.31e-17	1.75e-16	pals-24
WBGene00011535	11.7924	-6.25417	1.64142	-3.81022	0.000138842	0.00032768	T06E4.8
WBGene00008101	285.702	-6.25201	1.82887	-3.41851	0.000629657	0.00135386	C44H9.6
WBGene00016714	66.7734	-6.25179	1.08803	-5.74598	9.14e-09	3.43e-08	C46F2.1
WBGene00044797	111.696	-6.2507	0.877491	-7.12338	1.05e-12	5.58e-12	F13E9.13
WBGene00016450	446.056	-6.24929	0.547977	-11.4043	3.98e-30	6.47e-29	clec-5
WBGene00004721	129.699	-6.24838	0.688085	-9.08083	1.08e-19	9.43e-19	san-1
WBGene00007670	64.1004	-6.24836	0.943414	-6.62314	3.52e-11	1.64e-10	stg-1
WBGene00022106	697.957	-6.24764	0.484889	-12.8847	5.49e-38	1.37e-36	lgc-46
WBGene00015774	11.7241	-6.24736	1.5729	-3.97188	7.13e-05	0.000174566	C14E2.5
WBGene00007309	11.7089	-6.24534	1.48052	-4.21836	2.46e-05	6.38e-05	C04G2.10
WBGene00008031	540.06	-6.24525	0.396062	-15.7683	5.14e-56	3.31e-54	C39E9.7
WBGene00021658	63.7334	-6.24516	0.979269	-6.37737	1.8e-10	7.86e-10	Y48G1A.2
WBGene00006658	63.96	-6.24504	0.93874	-6.65258	2.88e-11	1.35e-10	twk-3
WBGene00000724	146.013	-6.24463	1.09314	-5.71257	1.11e-08	4.15e-08	col-151
WBGene00021970	11.6917	-6.24331	1.48107	-4.21541	2.49e-05	6.46e-05	srz-64
WBGene00008826	11.6835	-6.24188	1.45227	-4.29802	1.72e-05	4.56e-05	fbxa-100
WBGene00019587	43.6754	-6.24098	1.20778	-5.16734	2.37e-07	7.71e-07	K09F6.4
WBGene00006639	149.654	-6.24051	0.643978	-9.69056	3.31e-22	3.36e-21	tsp-13
WBGene00004395	390.905	-6.23956	0.76711	-8.13385	4.16e-16	2.86e-15	rol-3
WBGene00016744	213.12	-6.23805	0.588388	-10.6019	2.92e-26	3.8e-25	bbs-9
WBGene00007153	1203.23	-6.23717	0.519265	-12.0115	3.09e-33	5.98e-32	clec-41
WBGene00020700	166.248	-6.23709	0.978533	-6.37391	1.84e-10	8.03e-10	T22F3.11
WBGene00008207	11.6428	-6.23565	1.5333	-4.06682	4.77e-05	0.000119267	C49F5.3
WBGene00022328	11.6385	-6.23513	1.5249	-4.08887	4.33e-05	0.000109085	Y82E9BL.12
WBGene00000799	171.137	-6.23466	0.682669	-9.13278	6.68e-20	5.93e-19	crn-6
WBGene00011801	954.957	-6.23463	0.720618	-8.65178	5.07e-18	4.01e-17	T16G1.7
WBGene00021772	42.3628	-6.2342	1.13075	-5.51332	3.52e-08	1.25e-07	math-45
WBGene00007489	11.6091	-6.23253	1.46928	-4.24189	2.22e-05	5.78e-05	C09G5.7
WBGene00001828	66.0724	-6.23183	1.11771	-5.57555	2.47e-08	8.89e-08	hch-1
WBGene00021153	11.6079	-6.23118	1.7034	-3.65809	0.0002541	0.000578012	Y4C6A.3
WBGene00005559	11.6019	-6.23112	1.48991	-4.18222	2.89e-05	7.42e-05	sri-47
WBGene00000241	212.229	-6.23081	0.568831	-10.9537	6.38e-28	9.11e-27	bbs-1
WBGene00001548	710.791	-6.22913	0.485512	-12.83	1.11e-37	2.74e-36	gcy-23
WBGene00077763	148.065	-6.22911	0.795762	-7.82786	4.96e-15	3.16e-14	glb-34
WBGene00005420	169.8	-6.22797	0.62334	-9.99128	1.66e-23	1.83e-22	srh-210
WBGene00044587	11.5686	-6.22715	1.49991	-4.15168	3.3e-05	8.42e-05	srz-105
WBGene00005808	11.5641	-6.2266	1.45561	-4.27766	1.89e-05	4.97e-05	srw-61
WBGene00004370	1327.13	-6.22633	0.384457	-16.1951	5.46e-59	4.1e-57	rig-3
WBGene00044117	11.5566	-6.22557	1.91445	-3.25188	0.00114645	0.0023745	srsx-10
WBGene00006097	11.5505	-6.22445	1.4647	-4.24964	2.14e-05	5.59e-05	str-31
WBGene00018438	11.5465	-6.22355	1.64319	-3.78749	0.000152179	0.000357247	btb-6
WBGene00018931	669.408	-6.22298	0.706262	-8.81115	1.24e-18	1.02e-17	ugt-52
WBGene00015559	231.905	-6.2215	0.529983	-11.739	8.04e-32	1.45e-30	npr-17
WBGene00010125	328.373	-6.22138	0.700608	-8.87998	6.69e-19	5.56e-18	dod-22
WBGene00219297	11.5119	-6.2208	1.51282	-4.11205	3.92e-05	9.93e-05	T23F11.11
WBGene00271444	11.5048	-6.22032	1.79228	-3.47062	0.000519252	0.00113288	T04C12.33
WBGene00013426	42.9983	-6.21985	1.19578	-5.20152	1.98e-07	6.47e-07	Y66A7A.7
WBGene00012404	1447.66	-6.2194	0.888125	-7.00284	2.51e-12	1.29e-11	Y6G8.2
WBGene00016519	11.4966	-6.21904	1.48631	-4.1842	2.86e-05	7.36e-05	srz-56
WBGene00002128	2260.54	-6.21891	0.286543	-21.7033	1.91e-104	1.63e-101	inx-6
WBGene00000468	11.5014	-6.21856	1.44719	-4.29699	1.73e-05	4.58e-05	ces-1
WBGene00015588	11.4833	-6.21699	1.45231	-4.28076	1.86e-05	4.91e-05	lido-3
WBGene00010150	3440.79	-6.21659	0.778639	-7.98392	1.42e-15	9.43e-15	F56D5.6
WBGene00016273	11.4869	-6.21612	1.57037	-3.95837	7.55e-05	0.000184316	C30G12.1
WBGene00007228	902.097	-6.2155	0.532463	-11.6731	1.75e-31	3.09e-30	acs-7
WBGene00202512	209.887	-6.21242	0.58174	-10.679	1.28e-26	1.69e-25	C25E10.16
WBGene00020546	83.0929	-6.21236	0.885132	-7.01857	2.24e-12	1.16e-11	zig-13
WBGene00004860	1499.47	-6.20914	0.454947	-13.648	2.07e-42	6.58e-41	sma-6
WBGene00044394	11.4195	-6.20791	1.58559	-3.9152	9.03e-05	0.000218452	B0034.7
WBGene00010223	207.307	-6.20778	0.672699	-9.22817	2.75e-20	2.49e-19	F58A3.3
WBGene00020559	257.16	-6.20569	1.80597	-3.43621	0.000589916	0.00127421	best-17
WBGene00271577	11.3895	-6.20407	1.49218	-4.15772	3.21e-05	8.22e-05	B0244.16
WBGene00008200	315.497	-6.20348	1.92495	-3.22267	0.00127004	0.00261247	C49C3.10
WBGene00004191	312.316	-6.2008	0.486008	-12.7586	2.79e-37	6.71e-36	prx-1
WBGene00077640	11.3581	-6.20032	1.51691	-4.08747	4.36e-05	0.000109684	Y26G10.4
WBGene00009702	143.09	-6.19946	0.805398	-7.69739	1.39e-14	8.55e-14	F44F4.3
WBGene00020775	11.347	-6.19851	1.53459	-4.03919	5.36e-05	0.00013344	T24E12.6
WBGene00005390	11.3204	-6.19683	1.60308	-3.86557	0.00011083	0.000264704	srh-174
WBGene00235090	11.3306	-6.19647	1.52188	-4.07159	4.67e-05	0.00011695	C38D9.13
WBGene00018692	204.356	-6.19228	0.5703	-10.8579	1.83e-27	2.52e-26	F52E1.2
WBGene00006217	11.2949	-6.19175	1.70194	-3.63806	0.000274704	0.000621743	str-173
WBGene00004017	100.796	-6.18934	1.00208	-6.17647	6.56e-10	2.72e-09	phg-1
WBGene00206514	63.0682	-6.18741	0.973571	-6.35537	2.08e-10	9.02e-10	R05G9.5
WBGene00016731	11.2582	-6.18721	1.72439	-3.58806	0.000333142	0.000746132	C46H11.7
WBGene00019424	152.425	-6.18696	0.885869	-6.98406	2.87e-12	1.47e-11	aptf-1
WBGene00022036	41.8036	-6.18672	1.1407	-5.42362	5.84e-08	2.02e-07	Y65B4BL.4
WBGene00002138	3657.62	-6.18594	0.397109	-15.5774	1.04e-54	6.19e-53	inx-16
WBGene00005038	11.2381	-6.18502	1.47649	-4.18899	2.8e-05	7.22e-05	sra-12
WBGene00017786	579.289	-6.18432	0.776092	-7.96854	1.61e-15	1.06e-14	F25E5.5
WBGene00003876	1013.2	-6.18405	0.522581	-11.8337	2.61e-32	4.85e-31	pept-2
WBGene00005850	11.2321	-6.18383	1.68494	-3.67007	0.000242487	0.000553722	srw-103
WBGene00002056	9803.75	-6.1817	0.373626	-16.5451	1.74e-61	1.48e-59	ifc-2
WBGene00003700	281.801	-6.18139	0.569923	-10.846	2.08e-27	2.86e-26	nhr-110
WBGene00009999	11.2001	-6.18083	1.51051	-4.09189	4.28e-05	0.000107769	srsx-35
WBGene00010063	712.968	-6.17607	0.402356	-15.3498	3.56e-53	2e-51	dhrs-4
WBGene00013980	60.6184	-6.17555	1.09588	-5.63522	1.75e-08	6.39e-08	dos-1
WBGene00008866	11.1542	-6.1752	1.50943	-4.09107	4.29e-05	0.000108137	F15G9.2
WBGene00003530	1975.27	-6.17409	0.417475	-14.7891	1.72e-49	8.1e-48	nas-11
WBGene00011360	11.1524	-6.17354	1.53944	-4.01026	6.07e-05	0.000149914	lgc-18
WBGene00003670	537.769	-6.17305	0.417242	-14.7949	1.58e-49	7.45e-48	nhr-80
WBGene00007393	426.665	-6.17296	0.397993	-15.5102	2.96e-54	1.75e-52	fbxa-157
WBGene00268199	21.9306	-6.17139	1.69346	-3.64426	0.000268165	0.000608103	C45H4.21
WBGene00013145	11.1226	-6.1696	1.75904	-3.50737	0.000452565	0.000995386	cutl-2
WBGene00008017	60.6478	-6.16899	0.961581	-6.41546	1.4e-10	6.19e-10	fbxa-176
WBGene00019364	41.3275	-6.16846	1.14646	-5.38045	7.43e-08	2.54e-07	mksr-1
WBGene00022333	11.0914	-6.16759	1.70955	-3.60773	0.000308883	0.000695118	fbxa-27
WBGene00007916	248.086	-6.16563	1.83674	-3.35684	0.000788383	0.00167084	C34C6.3
WBGene00044661	62.1608	-6.1647	0.982039	-6.27745	3.44e-10	1.46e-09	fbxa-143
WBGene00016759	598.769	-6.16337	0.443803	-13.8876	7.53e-44	2.66e-42	C49A9.5
WBGene00015610	11.0679	-6.16246	1.67422	-3.68079	0.000232512	0.000532294	C08F1.6
WBGene00019869	506.884	-6.1607	0.669729	-9.19879	3.62e-20	3.26e-19	cnnm-2
WBGene00050917	11.0483	-6.16038	1.4693	-4.19273	2.76e-05	7.11e-05	Y53G8AL.4
WBGene00020699	202.014	-6.15988	0.594441	-10.3625	3.67e-25	4.45e-24	T22F3.10
WBGene00020892	11.0386	-6.15976	1.56285	-3.94136	8.1e-05	0.000196956	T28C12.5
WBGene00013285	11.0295	-6.15809	1.52631	-4.03462	5.47e-05	0.000135925	dct-12
WBGene00019098	11.0255	-6.15752	1.46446	-4.20463	2.62e-05	6.77e-05	F59B1.4
WBGene00206373	80.1437	-6.15711	0.849929	-7.24427	4.35e-13	2.37e-12	C27A2.12
WBGene00008073	161.993	-6.15706	0.609089	-10.1086	5.06e-24	5.71e-23	C43F9.5
WBGene00016335	807.631	-6.15678	0.884295	-6.96236	3.35e-12	1.7e-11	gba-1
WBGene00007384	1000.79	-6.15598	0.796502	-7.72877	1.09e-14	6.73e-14	swt-3
WBGene00044295	149.642	-6.15328	0.931578	-6.60522	3.97e-11	1.84e-10	C09E7.10
WBGene00020939	82.2896	-6.15288	0.856102	-7.18709	6.62e-13	3.57e-12	W02D7.3
WBGene00005988	10.9806	-6.15252	1.4666	-4.19509	2.73e-05	7.04e-05	srx-97
WBGene00044803	10.9706	-6.15021	1.55617	-3.95216	7.74e-05	0.000188864	C02G6.3
WBGene00006954	10.9726	-6.15019	1.94951	-3.15474	0.00160643	0.00325143	wrt-8
WBGene00012429	10.9654	-6.14913	2.00819	-3.06203	0.00219839	0.004355	Y11D7A.5
WBGene00008280	156.978	-6.14778	0.876441	-7.01448	2.31e-12	1.19e-11	acc-2
WBGene00008057	10.9388	-6.1467	1.45786	-4.21624	2.48e-05	6.44e-05	irld-25
WBGene00003534	10.9434	-6.14641	1.58447	-3.87917	0.000104814	0.000251134	nas-15
WBGene00019392	10.939	-6.1461	1.47871	-4.15638	3.23e-05	8.26e-05	irld-44
WBGene00011695	118.051	-6.1452	0.895575	-6.86174	6.8e-12	3.38e-11	T10G3.4
WBGene00008621	468.765	-6.143	0.690309	-8.89892	5.64e-19	4.71e-18	F09C8.1
WBGene00005082	10.9038	-6.14092	1.59367	-3.85331	0.00011653	0.00027767	srd-4
WBGene00195213	10.8927	-6.14073	1.65397	-3.71273	0.000205039	0.000473442	F11C1.9
WBGene00010621	117.838	-6.14072	0.790376	-7.76937	7.89e-15	4.94e-14	egg-6
WBGene00012775	10.8729	-6.13776	1.46534	-4.18862	2.81e-05	7.23e-05	srt-50
WBGene00006025	10.8668	-6.13697	1.49337	-4.10949	3.97e-05	0.000100304	srx-134
WBGene00013417	98.1195	-6.13676	0.901676	-6.80595	1e-11	4.91e-11	srab-24
WBGene00017267	1555.41	-6.13628	0.573772	-10.6946	1.08e-26	1.43e-25	numr-2
WBGene00003606	1609.13	-6.13593	0.726498	-8.4459	3.02e-17	2.26e-16	nhr-7
WBGene00020906	521.61	-6.13587	0.723079	-8.48576	2.14e-17	1.62e-16	T28H11.8
WBGene00006138	10.8516	-6.13455	1.54064	-3.98181	6.84e-05	0.000168033	str-78
WBGene00010987	58.9572	-6.13375	1.07445	-5.70876	1.14e-08	4.24e-08	R03C1.1
WBGene00022741	10.8267	-6.1313	1.46483	-4.18568	2.84e-05	7.32e-05	ZK430.5
WBGene00019132	10.8204	-6.13111	1.48749	-4.12179	3.76e-05	9.53e-05	bath-19
WBGene00015424	97.2527	-6.13103	1.03026	-5.95093	2.67e-09	1.05e-08	C04E6.8
WBGene00012632	331.576	-6.13032	1.99007	-3.08046	0.00206684	0.00411104	Y38H6C.20
WBGene00219287	10.8139	-6.13031	1.46339	-4.18911	2.8e-05	7.22e-05	F36D1.23
WBGene00018434	10.8051	-6.12911	1.5539	-3.94433	8e-05	0.000194701	ceh-81
WBGene00010863	10.8101	-6.12873	1.52911	-4.00803	6.12e-05	0.000151253	M04D8.5
WBGene00236809	154.929	-6.1285	0.874632	-7.00695	2.44e-12	1.25e-11	ZK993.5
WBGene00007804	10.8026	-6.12835	1.60459	-3.81926	0.000133853	0.000316734	C29F3.3
WBGene00005477	40.3192	-6.12805	1.17593	-5.21124	1.88e-07	6.16e-07	srh-271
WBGene00001612	286.638	-6.12803	0.715483	-8.56488	1.08e-17	8.33e-17	glr-1
WBGene00005582	10.7899	-6.12762	1.54227	-3.97313	7.09e-05	0.000173747	sri-70
WBGene00009094	102.261	-6.12697	0.848653	-7.21964	5.21e-13	2.83e-12	F23H12.5
WBGene00019649	892.774	-6.12653	0.40965	-14.9555	1.43e-50	7.2e-49	K11D12.9
WBGene00005313	10.7844	-6.12642	2.60805	-2.34904	0.0188217	0.031634	srh-92
WBGene00019655	119.341	-6.1249	0.712931	-8.59116	8.61e-18	6.7e-17	K11G9.5
WBGene00003958	4176.31	-6.12421	0.577711	-10.6008	2.95e-26	3.84e-25	pcp-3
WBGene00003841	146.041	-6.12006	0.914143	-6.69486	2.16e-11	1.03e-10	ocr-4
WBGene00235320	10.7342	-6.11991	1.5509	-3.94604	7.95e-05	0.000193396	R02F11.11
WBGene00043702	177.415	-6.1191	0.595807	-10.2703	9.59e-25	1.13e-23	Y54G2A.7
WBGene00012233	10.7277	-6.11868	1.46099	-4.18803	2.81e-05	7.25e-05	clpr-1
WBGene00044436	10.7252	-6.11829	1.51995	-4.02531	5.69e-05	0.000141029	Y47G6A.31
WBGene00012810	375.956	-6.11798	2.02809	-3.01662	0.00255613	0.00500339	nceh-1
WBGene00005895	10.7294	-6.11794	1.76993	-3.4566	0.000547033	0.00118934	srx-4
WBGene00000042	199.014	-6.11785	0.695079	-8.80166	1.35e-18	1.1e-17	acr-2
WBGene00009601	137.394	-6.1178	0.653199	-9.36591	7.54e-21	7.04e-20	F40G12.6
WBGene00011359	10.7157	-6.11664	1.57152	-3.89218	9.93e-05	0.000239005	lgc-17
WBGene00003696	196.493	-6.11585	0.595772	-10.2654	1.01e-24	1.19e-23	nhr-106
WBGene00194708	95.7423	-6.11506	1.17257	-5.21507	1.84e-07	6.04e-07	Y36E3A.2
WBGene00018428	10.6778	-6.11164	1.50207	-4.06882	4.73e-05	0.000118276	fbxa-183
WBGene00006202	10.6773	-6.11157	1.53798	-3.97378	7.07e-05	0.000173315	str-156
WBGene00016302	215.254	-6.11144	0.667114	-9.16101	5.14e-20	4.59e-19	fbxc-7
WBGene00014190	10.6742	-6.11065	1.52387	-4.00995	6.07e-05	0.000150096	irld-62
WBGene00020607	10.669	-6.11052	1.45791	-4.1913	2.77e-05	7.15e-05	srab-20
WBGene00003959	670.164	-6.1091	0.59566	-10.256	1.11e-24	1.31e-23	pcp-4
WBGene00017969	830.788	-6.10733	0.374184	-16.3218	6.91e-60	5.35e-58	ctsa-3.1
WBGene00004346	685.366	-6.10716	0.337545	-18.0929	3.63e-73	5.79e-71	rgs-3
WBGene00017270	1558.45	-6.10396	0.567249	-10.7606	5.28e-27	7.15e-26	numr-1
WBGene00015918	522.571	-6.10376	0.533647	-11.4378	2.71e-30	4.44e-29	C17G10.6
WBGene00007801	682.077	-6.10263	0.823826	-7.40767	1.29e-13	7.35e-13	trpa-1
WBGene00019074	1458.63	-6.10262	0.602299	-10.1322	3.98e-24	4.52e-23	cpd-1
WBGene00015089	10.6153	-6.10253	1.55639	-3.92095	8.82e-05	0.000213487	B0252.5
WBGene00007802	10.6099	-6.1018	1.54663	-3.94522	7.97e-05	0.000193995	cutl-27
WBGene00016095	491.573	-6.10154	0.485945	-12.556	3.68e-36	8.4e-35	C25E10.5
WBGene00002037	1660.84	-6.10068	0.439864	-13.8695	9.7e-44	3.39e-42	hum-4
WBGene00044385	103.502	-6.10042	1.15312	-5.29035	1.22e-07	4.08e-07	F59A6.10
WBGene00005669	10.5861	-6.09979	1.47764	-4.12805	3.66e-05	9.29e-05	sru-6
WBGene00020420	95.7811	-6.09929	0.810693	-7.52355	5.33e-14	3.14e-13	T10E10.3
WBGene00001547	463.536	-6.09832	0.384938	-15.8423	1.59e-56	1.06e-54	gcy-22
WBGene00015045	616.694	-6.09801	0.436167	-13.9809	2.04e-44	7.38e-43	cyp-34A10
WBGene00010414	10.5723	-6.09739	1.46904	-4.15058	3.32e-05	8.46e-05	hpa-1
WBGene00010334	808.38	-6.09652	0.346203	-17.6097	2.08e-69	2.63e-67	del-5
WBGene00019012	253.654	-6.09222	0.559757	-10.8837	1.38e-27	1.93e-26	F57C9.6
WBGene00001249	344.461	-6.09082	2.01262	-3.02631	0.00247555	0.00485919	elt-1
WBGene00010143	136.266	-6.09052	0.651085	-9.35442	8.41e-21	7.83e-20	F56A12.2
WBGene00010925	168.061	-6.09011	0.907036	-6.7143	1.89e-11	9.03e-11	M153.2
WBGene00020359	253.554	-6.08783	0.566833	-10.7401	6.6e-27	8.89e-26	math-40
WBGene00008015	10.5035	-6.08781	1.50231	-4.0523	5.07e-05	0.00012658	fbxa-174
WBGene00013074	186.91	-6.08715	0.843525	-7.21632	5.34e-13	2.9e-12	hmit-1.2
WBGene00016728	479.185	-6.08597	0.417527	-14.5762	3.98e-48	1.75e-46	C46H11.2
WBGene00011630	164.988	-6.08586	0.985288	-6.17673	6.54e-10	2.72e-09	T08G11.3
WBGene00017279	10.4857	-6.08545	1.46396	-4.15685	3.23e-05	8.25e-05	F09C12.8
WBGene00017936	346.948	-6.08463	0.41811	-14.5527	5.61e-48	2.45e-46	zipt-2.2
WBGene00006575	3631.88	-6.08453	0.313106	-19.4328	4.08e-84	1.22e-81	tir-1
WBGene00020308	10.471	-6.08439	1.59371	-3.81775	0.000134676	0.000318548	T07D3.5
WBGene00010261	10.4622	-6.08188	1.61086	-3.77556	0.000159648	0.000373691	srh-308
WBGene00016832	10.4642	-6.08178	1.63597	-3.71754	0.00020117	0.000465224	sre-49
WBGene00012782	6665.38	-6.08065	0.312282	-19.4717	1.91e-84	5.89e-82	Y43C5A.2
WBGene00014136	623.782	-6.08022	0.441903	-13.7592	4.49e-43	1.5e-41	ZK896.5
WBGene00011069	175.47	-6.07815	0.644659	-9.42848	4.16e-21	3.95e-20	ceh-62
WBGene00020290	10.4372	-6.07792	2.01594	-3.01493	0.00257036	0.00502949	T06D4.1
WBGene00017901	1123.56	-6.07766	0.330952	-18.3641	2.54e-75	4.51e-73	igeg-1
WBGene00008202	10.4252	-6.07686	1.49573	-4.06281	4.85e-05	0.000121266	clec-197
WBGene00022842	112.279	-6.07665	0.864308	-7.03065	2.06e-12	1.06e-11	ZK994.6
WBGene00010686	248.097	-6.07664	0.629895	-9.64708	5.06e-22	5.08e-21	K08F9.3
WBGene00000771	10.4173	-6.07637	1.52427	-3.98642	6.71e-05	0.000164965	cpb-2
WBGene00015981	263.248	-6.07578	0.530922	-11.4438	2.53e-30	4.15e-29	elt-7
WBGene00020404	58.2018	-6.07395	0.94968	-6.39579	1.6e-10	7.01e-10	T10B11.8
WBGene00008519	472.232	-6.07325	0.497066	-12.2182	2.49e-34	5.17e-33	cyp-13B1
WBGene00006213	10.384	-6.0719	1.55041	-3.91631	8.99e-05	0.00021749	str-169
WBGene00010524	381.9	-6.07174	0.420011	-14.4562	2.29e-47	9.74e-46	K03B8.6
WBGene00018295	10.3908	-6.07141	1.58348	-3.83422	0.000125964	0.000299073	oac-29
WBGene00017718	10.3802	-6.07094	1.58053	-3.84108	0.000122495	0.000291328	F22F4.5
WBGene00010415	10.376	-6.07094	1.50959	-4.02159	5.78e-05	0.000143199	irld-39
WBGene00012256	60.2943	-6.07077	1.33844	-4.53571	5.74e-06	1.6e-05	lpr-5
WBGene00009877	425.47	-6.0707	2.12981	-2.85035	0.00436713	0.00824028	F49C12.7
WBGene00005737	10.3787	-6.07069	1.73307	-3.50286	0.000460293	0.001011	srv-26
WBGene00018708	10.3598	-6.06819	1.70685	-3.55521	0.000377683	0.000840207	oac-32
WBGene00008787	152.422	-6.06763	0.619389	-9.79616	1.17e-22	1.22e-21	F14B6.6
WBGene00005700	10.3422	-6.0664	1.51741	-3.99788	6.39e-05	0.000157544	sru-37
WBGene00012176	10.3443	-6.06638	1.6816	-3.60751	0.000309155	0.000695661	W01C9.2
WBGene00005395	10.346	-6.06534	1.56708	-3.87047	0.000108624	0.000259628	srh-180
WBGene00019592	852.701	-6.06376	0.470393	-12.8908	5.07e-38	1.27e-36	K09F6.9
WBGene00011752	172.151	-6.06374	0.611935	-9.90914	3.8e-23	4.08e-22	fbxa-2
WBGene00077616	10.3293	-6.0635	1.47066	-4.12299	3.74e-05	9.49e-05	F57E7.4
WBGene00008157	10.3302	-6.06314	1.53479	-3.95047	7.8e-05	0.000190106	C47F8.1
WBGene00002211	119.363	-6.06204	0.90806	-6.67581	2.46e-11	1.16e-10	kin-30
WBGene00012912	10.3135	-6.06141	1.47293	-4.1152	3.87e-05	9.8e-05	Y46G5A.22
WBGene00016658	55.3287	-6.06003	1.29853	-4.66684	3.06e-06	8.84e-06	C45B2.1
WBGene00007832	10.2969	-6.05863	1.52253	-3.97932	6.91e-05	0.000169638	srbc-82
WBGene00005958	10.286	-6.05823	1.59108	-3.80762	0.00014031	0.000331006	srx-67
WBGene00011798	396.746	-6.05766	0.519145	-11.6685	1.85e-31	3.26e-30	T16G1.4
WBGene00017126	1047.32	-6.05536	1.60844	-3.76475	0.000166718	0.000389107	E04F6.6
WBGene00008043	56.1542	-6.05497	0.9422	-6.42642	1.31e-10	5.78e-10	C40H1.8
WBGene00013042	1423.32	-6.05453	0.619953	-9.7661	1.57e-22	1.63e-21	cccp-1
WBGene00006435	20.2442	-6.0544	1.40906	-4.29677	1.73e-05	4.58e-05	stdh-4
WBGene00017503	212.498	-6.05334	0.638985	-9.47336	2.71e-21	2.6e-20	nhr-177
WBGene00011097	583.184	-6.05327	0.731559	-8.27447	1.29e-16	9.2e-16	nhr-206
WBGene00018459	5631.47	-6.05263	0.455007	-13.3023	2.25e-40	6.4e-39	F45D11.16
WBGene00019379	10.2379	-6.05065	1.47621	-4.09876	4.15e-05	0.000104842	K04A8.10
WBGene00012538	547.25	-6.05063	0.642534	-9.41682	4.65e-21	4.39e-20	Y37A1B.5
WBGene00021343	385.486	-6.04914	0.731832	-8.26576	1.39e-16	9.88e-16	cutl-23
WBGene00016543	10.2207	-6.04833	1.47292	-4.10635	4.02e-05	0.00010163	srsx-14
WBGene00007401	10.215	-6.04676	1.92663	-3.13851	0.00169808	0.00342261	C07A9.5
WBGene00019146	55.2262	-6.04589	1.22215	-4.94693	7.54e-07	2.33e-06	H02F09.3
WBGene00010025	10.1981	-6.04512	2.53992	-2.38005	0.0173104	0.0293039	srbc-54
WBGene00007381	10.2027	-6.04506	1.60526	-3.76579	0.000166023	0.000387604	C06C6.7
WBGene00017323	10.1762	-6.04233	1.48175	-4.07782	4.55e-05	0.000114078	mps-4
WBGene00017892	5190.75	-6.04162	0.635239	-9.51079	1.89e-21	1.84e-20	F28B4.3
WBGene00019181	57.4051	-6.0413	1.02085	-5.91792	3.26e-09	1.28e-08	H10D18.6
WBGene00000081	9015.48	-6.04055	0.442751	-13.6432	2.22e-42	7e-41	ads-1
WBGene00018744	521.618	-6.03948	0.524277	-11.5196	1.05e-30	1.77e-29	F53B3.6
WBGene00005416	10.1542	-6.03935	1.48378	-4.07023	4.7e-05	0.000117584	srh-206
WBGene00005188	162.992	-6.03933	0.999765	-6.04074	1.53e-09	6.19e-09	srg-31
WBGene00012013	1130.34	-6.03897	0.974662	-6.19597	5.79e-10	2.42e-09	ugt-54
WBGene00006007	10.156	-6.03872	1.65634	-3.64582	0.000266545	0.000604552	srx-116
WBGene00000831	3474.43	-6.03807	0.262968	-22.9613	1.14e-116	1.51e-113	ctl-2
WBGene00000169	2604.39	-6.03757	0.803397	-7.51505	5.69e-14	3.33e-13	aqp-1
WBGene00016094	145.235	-6.03732	0.93495	-6.45737	1.07e-10	4.76e-10	C25E10.4
WBGene00005385	10.1394	-6.03601	1.80268	-3.34835	0.000812955	0.00172017	srh-169
WBGene00007474	269.108	-6.03596	1.97216	-3.06059	0.00220905	0.00437419	C08H9.15
WBGene00009637	10.1209	-6.03482	1.50089	-4.02082	5.8e-05	0.00014365	nspc-13
WBGene00007604	977.884	-6.03352	0.358814	-16.8151	1.89e-63	1.79e-61	xbx-9
WBGene00017012	3021.54	-6.03318	0.439891	-13.7152	8.24e-43	2.7e-41	acs-22
WBGene00016827	10.1124	-6.03304	1.47486	-4.09058	4.3e-05	0.000108336	sre-53
WBGene00005295	10.1119	-6.03296	1.48941	-4.05056	5.11e-05	0.000127438	srh-74
WBGene00011094	126.978	-6.03246	0.929848	-6.48758	8.72e-11	3.93e-10	R07B7.10
WBGene00005194	10.1079	-6.03243	1.47331	-4.09446	4.23e-05	0.000106699	srg-37
WBGene00018042	268.301	-6.03211	1.92656	-3.13103	0.00174193	0.00350503	mks-3
WBGene00001475	1122.11	-6.03192	0.564646	-10.6826	1.23e-26	1.63e-25	fmi-1
WBGene00003862	319.997	-6.03191	0.687758	-8.77039	1.78e-18	1.45e-17	old-1
WBGene00022736	297.637	-6.02993	1.93873	-3.11024	0.00186935	0.00374202	ZK418.7
WBGene00019667	108.501	-6.0295	1.03831	-5.807	6.36e-09	2.43e-08	spe-49
WBGene00013914	158.56	-6.02936	0.970232	-6.21435	5.15e-10	2.16e-09	lgc-37
WBGene00001792	10.0871	-6.02897	1.5004	-4.01825	5.86e-05	0.000145163	gst-44
WBGene00016579	76.6951	-6.02729	0.977727	-6.1646	7.07e-10	2.93e-09	sre-14
WBGene00004789	1380.88	-6.02699	0.390337	-15.4405	8.75e-54	5.1e-52	sgk-1
WBGene00018430	262.065	-6.02681	0.557028	-10.8196	2.78e-27	3.8e-26	nhr-142
WBGene00003956	3740.18	-6.02646	0.714783	-8.43117	3.42e-17	2.55e-16	pcp-1
WBGene00011130	10.0641	-6.02562	1.68915	-3.56724	0.000360762	0.000804312	zip-6
WBGene00194646	10.0586	-6.02507	1.50646	-3.9995	6.35e-05	0.000156553	Y105C5A.1270
WBGene00016719	612.107	-6.02341	0.382724	-15.7383	8.27e-56	5.26e-54	math-24
WBGene00015444	10.044	-6.02257	1.5524	-3.87952	0.000104663	0.000250852	C04F5.2
WBGene00044787	77.5408	-6.02162	1.13287	-5.31535	1.06e-07	3.58e-07	pals-36
WBGene00013838	234.482	-6.02157	0.600347	-10.0302	1.12e-23	1.25e-22	fbxa-31
WBGene00003653	301.242	-6.02071	0.610399	-9.86357	5.99e-23	6.34e-22	nhr-63
WBGene00005836	10.0136	-6.01796	1.75073	-3.4374	0.000587333	0.00126924	srw-89
WBGene00001127	257.511	-6.01745	0.584697	-10.2916	7.69e-25	9.16e-24	dyf-11
WBGene00010707	56.3778	-6.01608	1.01428	-5.93137	3e-09	1.18e-08	cyp-14A3
WBGene00006021	9.97853	-6.01451	1.59063	-3.78121	0.000156068	0.000365956	srx-130
WBGene00015574	319.884	-6.01239	0.908841	-6.61545	3.7e-11	1.72e-10	irg-1
WBGene00018973	9.96916	-6.01216	1.51172	-3.97704	6.98e-05	0.000171195	srz-20
WBGene00017393	9.95989	-6.01149	1.48667	-4.04358	5.26e-05	0.000131018	nep-5
WBGene00010660	477.83	-6.0114	0.946513	-6.3511	2.14e-10	9.26e-10	K08D8.6
WBGene00003711	356.405	-6.01059	0.547138	-10.9855	4.49e-28	6.5e-27	nhr-121
WBGene00014163	54.3102	-6.01022	0.963086	-6.24058	4.36e-10	1.84e-09	rnh-1.2
WBGene00045403	75.1826	-6.00991	0.910877	-6.59794	4.17e-11	1.93e-10	K10H10.12
WBGene00016271	9.94815	-6.0098	1.67106	-3.59639	0.000322662	0.00072439	irld-23
WBGene00004875	755.147	-6.00896	0.406667	-14.7761	2.09e-49	9.76e-48	smd-1
WBGene00001705	55.8762	-6.00854	0.9785	-6.14056	8.22e-10	3.39e-09	grd-16
WBGene00022416	90.2617	-6.0082	0.810672	-7.41139	1.25e-13	7.15e-13	Y102A11A.6
WBGene00235308	9.94272	-6.00797	1.54915	-3.87823	0.000105219	0.00025205	C37C3.17
WBGene00013250	53.9784	-6.00762	1.04047	-5.77394	7.74e-09	2.93e-08	Y57A10A.5
WBGene00010359	9.9329	-6.00634	1.64312	-3.65545	0.000256728	0.000583696	mam-6
WBGene00013037	887.15	-6.00483	0.488312	-12.2971	9.39e-35	2.01e-33	Y49E10.18
WBGene00020141	469.561	-6.00474	0.795718	-7.54632	4.48e-14	2.65e-13	lmd-5
WBGene00001872	71.9855	-6.00379	0.903687	-6.64366	3.06e-11	1.43e-10	him-14
WBGene00004005	631.076	-6.0034	0.47732	-12.5773	2.81e-36	6.45e-35	pgp-11
WBGene00013758	158.144	-6.00292	0.936256	-6.41163	1.44e-10	6.34e-10	fbxa-114
WBGene00000977	1076.96	-6.00292	0.35247	-17.031	4.83e-65	4.93e-63	dhs-14
WBGene00020789	9.89671	-6.00209	1.47442	-4.07081	4.68e-05	0.000117305	T25B6.3
WBGene00021304	256.649	-6.00029	0.542302	-11.0645	1.87e-28	2.76e-27	nphp-2
WBGene00019021	639.553	-6.00008	0.95855	-6.25954	3.86e-10	1.64e-09	F57H12.6
WBGene00022696	271.366	-5.99912	0.522228	-11.4876	1.52e-30	2.53e-29	ift-139
WBGene00010242	359.034	-5.99799	0.450409	-13.3168	1.85e-40	5.3e-39	F58D5.2
WBGene00005282	9.85216	-5.99589	1.48252	-4.04438	5.25e-05	0.000130617	srh-60
WBGene00013287	53.6904	-5.99572	1.04776	-5.72242	1.05e-08	3.92e-08	Y57A10C.9
WBGene00019675	9.84116	-5.99327	1.58802	-3.77404	0.000160626	0.0003759	K12D9.1
WBGene00003703	9.81834	-5.99111	1.5143	-3.95637	7.61e-05	0.00018569	nhr-113
WBGene00008097	9.81671	-5.99072	1.63882	-3.65551	0.000256672	0.000583628	ugt-15
WBGene00044169	88.5201	-5.98905	0.864741	-6.92584	4.33e-12	2.18e-11	C06C3.10
WBGene00009263	9.80588	-5.98876	1.49295	-4.01136	6.04e-05	0.000149282	F30A10.4
WBGene00010979	156.738	-5.98798	0.906703	-6.60412	4e-11	1.85e-10	R02D5.6
WBGene00022654	53.11	-5.98763	1.10112	-5.43777	5.4e-08	1.87e-07	ZK105.3
WBGene00009110	262.364	-5.98744	0.873598	-6.85377	7.19e-12	3.56e-11	F25D1.5
WBGene00009857	108.903	-5.98707	0.762753	-7.8493	4.18e-15	2.68e-14	clec-28
WBGene00012772	9.79189	-5.98577	1.59577	-3.75103	0.000176113	0.000410265	srt-49
WBGene00005603	9.77515	-5.98503	1.52239	-3.93134	8.45e-05	0.00020493	srj-15
WBGene00077497	9.78252	-5.98456	1.64596	-3.6359	0.000277011	0.000626712	K06A4.10
WBGene00006286	9.77389	-5.98415	1.73609	-3.44692	0.000567018	0.00122911	str-260
WBGene00015718	9.75315	-5.98188	1.54066	-3.88267	0.000103317	0.000247864	C13A2.1
WBGene00007422	566.556	-5.98041	0.764285	-7.82485	5.08e-15	3.23e-14	ugt-17
WBGene00016855	9.74307	-5.97987	1.51476	-3.94773	7.89e-05	0.000192123	C50H11.8
WBGene00006562	708.643	-5.97935	0.474175	-12.61	1.86e-36	4.31e-35	tdc-1
WBGene00005309	9.73597	-5.97824	1.49329	-4.00339	6.24e-05	0.000154137	srh-88
WBGene00009958	2135.84	-5.97822	0.440345	-13.5762	5.54e-42	1.71e-40	madd-4
WBGene00011530	190.377	-5.97795	1.02553	-5.82916	5.57e-09	2.14e-08	T06D8.10
WBGene00004256	774.95	-5.97603	1.04591	-5.71371	1.11e-08	4.12e-08	pxn-1
WBGene00015284	337.115	-5.97552	2.00492	-2.98043	0.00287846	0.00558423	C01B10.10
WBGene00013950	511.265	-5.9741	0.760173	-7.85887	3.88e-15	2.49e-14	ZK262.3
WBGene00005609	9.70069	-5.97389	1.51651	-3.93923	8.17e-05	0.000198602	srj-21
WBGene00020421	89.6214	-5.97357	0.872696	-6.84496	7.65e-12	3.78e-11	T10E10.4
WBGene00018467	1024.17	-5.97335	0.509524	-11.7234	9.67e-32	1.74e-30	sdpn-1
WBGene00007746	988.486	-5.97285	0.382118	-15.6309	4.48e-55	2.74e-53	C26D10.6
WBGene00007104	161.957	-5.97232	0.724563	-8.24265	1.68e-16	1.19e-15	B0024.15
WBGene00009912	9.69743	-5.97214	1.52933	-3.90507	9.42e-05	0.00022727	srz-94
WBGene00020697	370.505	-5.97164	0.467471	-12.7744	2.28e-37	5.52e-36	T22F3.7
WBGene00010218	9.68399	-5.97045	1.77216	-3.36902	0.000754354	0.00160219	sre-30
WBGene00010735	214.4	-5.96703	0.578194	-10.3201	5.72e-25	6.84e-24	frpr-15
WBGene00008278	178.582	-5.96628	0.582893	-10.2356	1.37e-24	1.6e-23	npr-10
WBGene00010741	172.03	-5.96603	1.00603	-5.93029	3.02e-09	1.19e-08	lgc-49
WBGene00012445	1445.45	-5.96492	0.594664	-10.0307	1.12e-23	1.24e-22	Y16B4A.2
WBGene00007751	131.925	-5.96418	0.964604	-6.18303	6.29e-10	2.62e-09	C26G2.2
WBGene00017678	249.207	-5.96363	0.617747	-9.65384	4.73e-22	4.77e-21	asp-12
WBGene00001542	112.429	-5.96328	0.982908	-6.06697	1.3e-09	5.29e-09	gcy-17
WBGene00008680	52.4189	-5.96289	1.08562	-5.49263	3.96e-08	1.39e-07	F11A5.15
WBGene00013975	87.7245	-5.96257	0.747593	-7.97568	1.52e-15	1.01e-14	ZK455.5
WBGene00009129	52.515	-5.95989	0.948832	-6.28129	3.36e-10	1.43e-09	F25H5.7
WBGene00017116	9.61598	-5.95962	1.82984	-3.25691	0.00112631	0.00233517	fbxb-78
WBGene00014998	91.8755	-5.95917	0.907704	-6.5651	5.2e-11	2.39e-10	AH9.1
WBGene00005071	9.59632	-5.95771	1.56158	-3.81517	0.000136091	0.000321659	srb-6
WBGene00006179	9.59414	-5.95738	1.48295	-4.01725	5.89e-05	0.000145746	str-130
WBGene00007183	9.58205	-5.95637	1.69584	-3.51234	0.000444183	0.000978001	B0462.4
WBGene00016862	2192.2	-5.95621	0.479155	-12.4306	1.78e-35	3.92e-34	C52A10.1
WBGene00010519	9.58651	-5.9557	1.55339	-3.83399	0.000126081	0.00029932	K03A11.1
WBGene00195176	298.191	-5.95558	0.674043	-8.83561	9.96e-19	8.21e-18	Y43F8B.24
WBGene00013331	125.373	-5.95516	0.838463	-7.10247	1.23e-12	6.46e-12	Y57G11C.42
WBGene00008341	4444.31	-5.95417	0.324062	-18.3736	2.14e-75	3.82e-73	ttr-44
WBGene00016686	337.978	-5.95374	0.785109	-7.58333	3.37e-14	2.01e-13	cyp-33C1
WBGene00008730	192.691	-5.95244	0.623334	-9.54935	1.31e-21	1.28e-20	F13B12.2
WBGene00009383	7556.68	-5.95233	0.271377	-21.9338	1.24e-106	1.21e-103	F35B12.3
WBGene00001437	9.56552	-5.9519	1.68703	-3.52804	0.000418646	0.000924305	fkh-5
WBGene00001075	1089.55	-5.95163	0.910788	-6.5346	6.38e-11	2.91e-10	dpy-14
WBGene00012089	9.54905	-5.95088	1.50685	-3.94921	7.84e-05	0.000191016	T27E7.4
WBGene00012003	9.54878	-5.95082	1.51746	-3.92158	8.8e-05	0.000212954	T24H10.5
WBGene00022610	1804.6	-5.9504	0.315728	-18.8466	3.13e-79	7.05e-77	ltah-1.2
WBGene00006028	9.5446	-5.95036	1.78497	-3.3336	0.000857312	0.00180909	srx-137
WBGene00022811	92.3683	-5.94929	1.02428	-5.80825	6.31e-09	2.41e-08	ZK721.4
WBGene00010119	9.54087	-5.94901	1.48887	-3.99567	6.45e-05	0.000158952	F55G7.1
WBGene00022324	103.129	-5.94876	0.822972	-7.22838	4.89e-13	2.66e-12	fbxa-26
WBGene00012526	9.53659	-5.94844	1.51406	-3.92879	8.54e-05	0.00020698	Y32B12C.3
WBGene00020413	278.612	-5.94777	0.476174	-12.4907	8.39e-36	1.88e-34	T10E9.3
WBGene00017400	138.066	-5.94564	0.733287	-8.10821	5.14e-16	3.51e-15	stg-2
WBGene00011445	801.397	-5.9455	0.457399	-12.9985	1.25e-38	3.22e-37	T04F8.7
WBGene00018470	1190.21	-5.94346	0.707088	-8.40554	4.26e-17	3.15e-16	F45E4.5
WBGene00016153	9.50352	-5.94312	2.57892	-2.3045	0.0211944	0.0352693	C27A2.5
WBGene00012614	9.50624	-5.94306	1.62776	-3.65106	0.00026116	0.000593174	Y38H6A.3
WBGene00005088	34.5482	-5.94189	1.253	-4.74213	2.11e-06	6.23e-06	srd-10
WBGene00018460	5714.99	-5.9417	0.448913	-13.2358	5.45e-40	1.51e-38	F45D11.16
WBGene00005893	118.25	-5.94112	0.991662	-5.99107	2.08e-09	8.33e-09	srx-2
WBGene00009032	9.47999	-5.9392	2.24549	-2.64495	0.0081704	0.0146881	bgnt-1.3
WBGene00005834	9.46851	-5.93843	2.54583	-2.33261	0.0196684	0.032944	srw-87
WBGene00020340	2237.88	-5.93827	0.468339	-12.6794	7.69e-37	1.81e-35	T08B1.1
WBGene00000166	420.907	-5.9369	0.700782	-8.47182	2.42e-17	1.82e-16	apt-9
WBGene00011600	102.291	-5.93686	0.823968	-7.20521	5.8e-13	3.14e-12	zim-2
WBGene00020714	851.507	-5.9365	0.33884	-17.5201	1.01e-68	1.22e-66	T23B3.6
WBGene00007455	341.762	-5.93637	0.815654	-7.27804	3.39e-13	1.87e-12	ugt-22
WBGene00010644	615.532	-5.93528	0.463999	-12.7916	1.83e-37	4.45e-36	K07G5.5
WBGene00010298	9.44268	-5.9348	1.51909	-3.90682	9.35e-05	0.000225727	F59A1.12
WBGene00013609	368.613	-5.93417	0.741078	-8.00749	1.17e-15	7.82e-15	clec-37
WBGene00016783	452.863	-5.93368	0.485979	-12.2097	2.76e-34	5.72e-33	irg-2
WBGene00206370	9.4385	-5.93349	1.49288	-3.97452	7.05e-05	0.000172846	F02D8.9
WBGene00000981	1324.3	-5.9316	0.377032	-15.7324	9.08e-56	5.74e-54	dhs-18
WBGene00004257	239.485	-5.92952	0.608898	-9.73813	2.07e-22	2.13e-21	pxn-2
WBGene00007336	3725.51	-5.92859	0.503171	-11.7825	4.81e-32	8.8e-31	C05C12.4
WBGene00010343	9.39568	-5.92774	1.59744	-3.71077	0.000206632	0.000476826	F59F5.4
WBGene00016758	402.558	-5.92764	0.895571	-6.61884	3.62e-11	1.68e-10	C49A9.4
WBGene00045458	9.39531	-5.92721	1.51355	-3.9161	9e-05	0.00021766	F17B5.8
WBGene00013249	52.6211	-5.92462	0.957826	-6.18549	6.19e-10	2.58e-09	Y57A10A.4
WBGene00219310	9.38143	-5.92385	1.71868	-3.44674	0.000567404	0.00122983	C17E4.19
WBGene00013458	388.255	-5.92235	0.550944	-10.7495	5.96e-27	8.05e-26	Y67A10A.9
WBGene00009854	52.9738	-5.92179	1.02782	-5.76148	8.34e-09	3.15e-08	clec-31
WBGene00019235	9.35759	-5.92095	1.49817	-3.95211	7.75e-05	0.000188882	H23N18.4
WBGene00009636	268.893	-5.92048	0.565209	-10.4749	1.13e-25	1.41e-24	F42F12.4
WBGene00006831	3913.11	-5.91994	0.485058	-12.2046	2.94e-34	6.08e-33	unc-104
WBGene00004234	237.748	-5.91968	0.722639	-8.19175	2.57e-16	1.8e-15	ptr-20
WBGene00013284	1504.52	-5.91916	0.390481	-15.1587	6.64e-52	3.54e-50	daf-22
WBGene00008613	88.7541	-5.91844	0.852275	-6.94429	3.8e-12	1.92e-11	fbxb-69
[truncated: 6,764 more rows]

## Sheet: non-coding increased in muscle
WB_GeneID	baseMean	log2FoldChange	lfcSE	stat	pvalue	padj
WBGene00044168	9251.37	9.96863	0.577877	17.2504	1.11e-66	1.2e-64
WBGene00196588	44.555	9.70071	1.5205	6.37994	1.77e-10	7.74e-10
WBGene00198209	139.327	9.48673	1.11536	8.50552	1.81e-17	1.37e-16
WBGene00197426	155.693	9.06638	1.02101	8.87978	6.7e-19	5.57e-18
WBGene00219925	255.749	8.77428	1.34308	6.53294	6.45e-11	2.94e-10
WBGene00201021	33.3286	8.31506	1.31763	6.31061	2.78e-10	1.19e-09
WBGene00199779	58.3086	8.22899	1.13388	7.25734	3.95e-13	2.16e-12
WBGene00199166	153.216	8.0216	0.817474	9.81266	9.93e-23	1.04e-21
WBGene00015951	65.2472	7.79195	0.957739	8.13578	4.09e-16	2.82e-15
WBGene00199045	11.8307	7.78885	1.53944	5.05953	4.2e-07	1.33e-06
WBGene00199819	87.5431	7.48871	0.824908	9.07823	1.1e-19	9.65e-19
WBGene00011459	9.56358	7.48294	1.6139	4.63656	3.54e-06	1.02e-05
WBGene00044782	15.6256	7.22071	1.44065	5.01213	5.38e-07	1.69e-06
WBGene00195756	7.89301	7.201	1.59308	4.52018	6.18e-06	1.72e-05
WBGene00195543	26.6487	7.08655	1.22445	5.78753	7.14e-09	2.71e-08
WBGene00198515	6.77151	6.98021	1.79156	3.89617	9.77e-05	0.000235307
WBGene00199794	13.1345	6.96203	1.42883	4.87253	1.1e-06	3.36e-06
WBGene00219886	9006.56	6.8689	0.484106	14.1888	1.07e-45	4.19e-44
WBGene00198810	6.04061	6.81884	1.94568	3.5046	0.000457302	0.00100492
WBGene00200396	11.6624	6.79003	1.45221	4.67567	2.93e-06	8.48e-06
WBGene00220014	11.1927	6.72798	1.46551	4.59088	4.41e-06	1.25e-05
WBGene00198586	5.37672	6.65416	1.91848	3.46846	0.000523457	0.00114128
WBGene00195325	5.29244	6.61967	1.97757	3.34738	0.000815781	0.00172582
WBGene00220188	26.656	6.50181	1.57113	4.13829	3.5e-05	8.91e-05
WBGene00199783	9.10187	6.42932	1.4899	4.31528	1.59e-05	4.23e-05
WBGene00199913	8.87475	6.38674	1.64563	3.88104	0.000104011	0.000249396
WBGene00200582	4.43975	6.37363	2.01039	3.17034	0.00152262	0.00309276
WBGene00014371	8.48064	6.32692	1.50224	4.21167	2.53e-05	6.57e-05
WBGene00195542	8.43273	6.32657	1.62996	3.88142	0.000103847	0.000249029
WBGene00198021	8.43052	6.32408	1.66133	3.80664	0.000140868	0.000332149
WBGene00196959	4.27174	6.32287	2.11331	2.99193	0.00277218	0.00539408
WBGene00023263	3630.01	6.28464	0.436336	14.4032	4.94e-47	2.06e-45
WBGene00196542	4.10664	6.26349	1.93786	3.23216	0.00122857	0.00253318
WBGene00198139	3.91416	6.1909	2.80235	2.20918	0.0271619	0.0442545
WBGene00220058	3.88114	6.17917	2.80429	2.20347	0.0275618	0.0448575
WBGene00199830	14.2737	6.15809	1.42012	4.33631	1.45e-05	3.86e-05
WBGene00201541	3.77646	6.13309	2.05776	2.98046	0.00287813	0.00558419
WBGene00219801	70.9081	6.05441	0.724818	8.35301	6.65e-17	4.85e-16
WBGene00198321	3.54376	6.05137	2.08776	2.8985	0.00374948	0.00715215
WBGene00220091	3.52065	6.04183	2.28958	2.63884	0.0083191	0.0149268
WBGene00196719	3.42256	5.9937	2.06507	2.90241	0.003703	0.00707308
WBGene00077501	3.33146	5.95922	2.24348	2.65624	0.0079018	0.0142439
WBGene00197083	3.27766	5.9386	2.10595	2.81991	0.0048037	0.00899397
WBGene00045189	71.9655	5.92369	0.555885	10.6563	1.63e-26	2.14e-25
WBGene00201198	17.7463	5.89285	1.13366	5.19808	2.01e-07	6.59e-07
WBGene00197609	11.5035	5.86129	1.34912	4.34452	1.4e-05	3.73e-05
WBGene00196967	3.10927	5.85662	2.10538	2.78174	0.00540683	0.0100414
WBGene00200318	3.06537	5.8386	2.26568	2.57698	0.00996676	0.0176457
WBGene00196868	3.05876	5.8359	2.07016	2.81905	0.00481657	0.00901505
WBGene00195427	28.1934	5.83337	0.876741	6.65346	2.86e-11	1.34e-10
WBGene00201986	11.3221	5.82019	1.34012	4.34304	1.41e-05	3.75e-05
WBGene00201558	55.7039	5.81425	0.700562	8.29942	1.05e-16	7.51e-16
WBGene00199017	3.00166	5.81196	2.12996	2.72866	0.00635916	0.01166
WBGene00044267	28.5236	5.80663	1.22429	4.74285	2.11e-06	6.21e-06
WBGene00003278	2.83987	5.72478	2.11597	2.70551	0.00681991	0.012439
WBGene00199114	2.75207	5.68493	2.3519	2.41717	0.0156418	0.0267102
WBGene00199450	2.68506	5.65306	2.35269	2.4028	0.01627	0.02768
WBGene00195700	90.2755	5.65236	0.572759	9.86865	5.69e-23	6.05e-22
WBGene00195436	128.736	5.65119	0.51069	11.0658	1.84e-28	2.72e-27
WBGene00004835	2.67147	5.63097	2.38017	2.36579	0.0179918	0.0303502
WBGene00201010	14.5645	5.5788	1.39961	3.98596	6.72e-05	0.00016525
WBGene00011405	424.433	5.5646	0.347462	16.015	1e-57	7.07e-56
WBGene00195688	2.52657	5.55827	2.17764	2.55243	0.0106974	0.018837
WBGene00202035	28.1982	5.55708	0.813236	6.8333	8.3e-12	4.09e-11
WBGene00202480	27.9074	5.53247	0.914608	6.04901	1.46e-09	5.9e-09
WBGene00196681	2.46946	5.52907	2.38412	2.31912	0.0203886	0.0340263
WBGene00050970	53.8846	5.52452	0.748541	7.38039	1.58e-13	8.93e-13
WBGene00195333	2.43547	5.5115	2.38503	2.31087	0.0208399	0.0347049
WBGene00196929	4.83712	5.5055	1.66206	3.31246	0.000924782	0.00194219
WBGene00220097	8.89246	5.48371	1.44724	3.78908	0.000151208	0.000355089
WBGene00197860	8.73786	5.45157	1.61749	3.3704	0.000750586	0.00159509
WBGene00196688	21.498	5.41876	0.971391	5.57835	2.43e-08	8.75e-08
WBGene00005403	592.612	5.41188	0.252109	21.4664	3.21e-102	2.49e-99
WBGene00198905	8.43853	5.40823	1.71605	3.15157	0.00162396	0.00328438
WBGene00195370	16.6654	5.40286	1.03664	5.2119	1.87e-07	6.14e-07
WBGene00044037	8.14894	5.36824	1.48639	3.6116	0.00030431	0.00068558
WBGene00220160	85.9669	5.3665	0.541154	9.91678	3.52e-23	3.79e-22
WBGene00197090	12.3146	5.33242	1.35704	3.92944	8.51e-05	0.000206484
WBGene00271649	35.7831	5.31614	0.746551	7.12094	1.07e-12	5.68e-12
WBGene00012453	51.3344	5.31589	0.797491	6.66576	2.63e-11	1.24e-10
WBGene00045129	72.4103	5.29712	0.837333	6.32618	2.51e-10	1.08e-09
WBGene00201212	43.1234	5.28658	0.743448	7.1109	1.15e-12	6.09e-12
WBGene00219292	573.852	5.27923	0.645814	8.17453	2.97e-16	2.06e-15
WBGene00022763	86.6825	5.27253	0.942733	5.59281	2.23e-08	8.09e-08
WBGene00023020	256.641	5.26339	0.462756	11.374	5.63e-30	9.08e-29
WBGene00199549	22.5405	5.2528	0.936321	5.61004	2.02e-08	7.35e-08
WBGene00198795	11.515	5.24892	1.34968	3.88901	0.000100652	0.00024191
WBGene00195644	93.6746	5.21996	0.517947	10.0782	6.9e-24	7.72e-23
WBGene00200733	11.2366	5.19217	1.38415	3.75117	0.00017601	0.000410072
WBGene00201505	11.2366	5.19217	1.38415	3.75117	0.00017601	0.000410072
WBGene00201398	14.532	5.19027	0.989412	5.24581	1.56e-07	5.15e-07
WBGene00201823	1.94718	5.18424	2.37809	2.18	0.0292576	0.0473742
WBGene00195616	1.94718	5.18424	2.37809	2.18	0.0292576	0.0473742
WBGene00196045	1.94718	5.18424	2.37809	2.18	0.0292576	0.0473742
WBGene00220159	35.9737	5.18412	0.820507	6.31819	2.65e-10	1.14e-09
WBGene00196298	11.0979	5.17402	1.34249	3.85404	0.000116183	0.000276959
WBGene00201012	43.5493	5.17031	0.734282	7.04132	1.9e-12	9.88e-12
WBGene00202300	10.8202	5.1568	1.2285	4.19764	2.7e-05	6.97e-05
WBGene00200659	3.78264	5.13844	1.78426	2.87988	0.00397832	0.00755921
WBGene00045161	20.8326	5.11529	0.853011	5.99675	2.01e-09	8.05e-09
WBGene00195040	13.8167	5.11145	0.982092	5.20465	1.94e-07	6.37e-07
WBGene00023390	23.9865	5.0902	0.816345	6.23536	4.51e-10	1.9e-09
WBGene00201420	3.62549	5.08794	1.82508	2.78779	0.00530687	0.00986631
WBGene00198162	6.76379	5.08486	1.54752	3.28582	0.00101686	0.00212172
WBGene00219800	6.5504	5.06749	1.53167	3.30847	0.000938058	0.0019686
WBGene00198679	10.1223	5.06061	1.23528	4.09672	4.19e-05	0.000105734
WBGene00197010	6.59955	5.05131	1.52438	3.31367	0.000920787	0.00193416
WBGene00198300	9.45219	5.03804	2.12309	2.37298	0.0176452	0.0298192
WBGene00045372	3.51324	5.02778	1.81296	2.77324	0.00555014	0.0102838
WBGene00197762	3.4275	4.99557	1.83108	2.72821	0.00636792	0.0116742
WBGene00269393	25.3178	4.99421	0.851573	5.86469	4.5e-09	1.74e-08
WBGene00202441	94.8152	4.96833	0.554517	8.95976	3.25e-19	2.76e-18
WBGene00196629	12.457	4.95148	1.17026	4.23107	2.33e-05	6.05e-05
WBGene00023375	6.33272	4.94481	1.66213	2.97498	0.00293005	0.00567952
WBGene00196091	6.26202	4.9176	1.82729	2.69119	0.00711971	0.0129418
WBGene00200618	18.1541	4.91046	1.15727	4.24315	2.2e-05	5.75e-05
WBGene00219782	33.7367	4.90923	1.10028	4.46179	8.13e-06	2.23e-05
WBGene00195668	5.78551	4.89841	1.80063	2.72039	0.00652041	0.0119333
WBGene00195907	11.7711	4.8968	1.14603	4.27286	1.93e-05	5.07e-05
WBGene00197884	11.6057	4.87472	1.13328	4.30144	1.7e-05	4.49e-05
WBGene00197991	3.1581	4.87307	1.83275	2.65887	0.00784021	0.0141442
WBGene00197210	3.1405	4.87027	1.9012	2.56168	0.0104167	0.0183844
WBGene00196950	5.73599	4.83528	1.59566	3.03026	0.00244343	0.00480073
WBGene00198506	28.5998	4.83431	0.730808	6.61502	3.71e-11	1.73e-10
WBGene00201849	5.66568	4.81871	1.66282	2.89792	0.00375649	0.00716431
WBGene00219582	3182.59	4.80877	0.262212	18.3393	4.02e-75	7.02e-73
WBGene00197374	5.55412	4.78488	1.47503	3.24391	0.001179	0.00243767
WBGene00004834	5.49896	4.74297	1.58589	2.99074	0.00278302	0.0054127
WBGene00014370	2.89531	4.7419	1.87645	2.52706	0.011502	0.0201514
WBGene00196702	8.1259	4.74138	1.3814	3.43229	0.0005985	0.00129114
WBGene00197385	2.88871	4.73902	1.91836	2.47034	0.0134984	0.023317
WBGene00198642	5.4025	4.73819	1.73929	2.72421	0.00644563	0.0118032
WBGene00200650	5.39893	4.73701	1.53515	3.08571	0.0020307	0.00404198
WBGene00198951	8.08563	4.73292	1.24205	3.81057	0.000138649	0.000327258
WBGene00004903	26.7302	4.72164	0.857561	5.50589	3.67e-08	1.29e-07
WBGene00201390	2.83944	4.72039	1.90074	2.48346	0.0130114	0.0225502
WBGene00196396	12.8197	4.68988	1.06805	4.39106	1.13e-05	3.04e-05
WBGene00023389	5.177	4.6719	1.7383	2.68763	0.00719617	0.0130671
WBGene00195819	5.2588	4.66263	1.94143	2.40165	0.0163211	0.0277523
WBGene00201423	10.1564	4.66164	1.11913	4.16542	3.11e-05	7.95e-05
WBGene00044923	12.7984	4.65972	1.01584	4.58705	4.5e-06	1.27e-05
WBGene00196257	427.137	4.65753	0.495448	9.40064	5.42e-21	5.1e-20
WBGene00219943	10.1942	4.6557	1.10948	4.19631	2.71e-05	7.01e-05
WBGene00196072	4.96702	4.65563	1.63203	2.85266	0.00433555	0.00818481
WBGene00196188	5.11146	4.65224	1.51352	3.0738	0.00211352	0.00419649
WBGene00197313	5.09165	4.644	1.60107	2.90056	0.00372496	0.00711079
WBGene00199946	10.0798	4.63269	1.16339	3.98205	6.83e-05	0.000167886
WBGene00198929	10.0594	4.62565	1.09484	4.22494	2.39e-05	6.21e-05
WBGene00023376	2.62715	4.59762	1.94703	2.36135	0.0182085	0.0306882
WBGene00200858	2.63251	4.59762	1.9463	2.36223	0.0181653	0.0306245
WBGene00220041	66.5962	4.59723	0.595239	7.72334	1.13e-14	7.01e-14
WBGene00220165	1006.66	4.59638	0.272091	16.8928	5.08e-64	4.87e-62
WBGene00199274	2.61821	4.59597	1.92045	2.39318	0.0167032	0.0283527
WBGene00200250	9.86204	4.58443	1.3479	3.40118	0.000670956	0.0014363
WBGene00269337	9.81154	4.57846	1.31044	3.49383	0.000476141	0.00104306
WBGene00198008	7.20408	4.57202	1.21523	3.76228	0.000168372	0.000392845
WBGene00198124	7.1899	4.55589	1.31336	3.46889	0.000522609	0.00113986
WBGene00004907	333.275	4.55559	0.563994	8.07737	6.62e-16	4.5e-15
WBGene00219852	18.8927	4.55512	1.05904	4.30118	1.7e-05	4.5e-05
WBGene00022995	2.53151	4.54902	2.02632	2.24496	0.0247705	0.040685
WBGene00196501	6.84015	4.54628	1.68722	2.69453	0.00704869	0.012822
WBGene00173758	13.9939	4.52995	0.92142	4.91627	8.82e-07	2.71e-06
WBGene00044995	426.745	4.52665	0.299058	15.1364	9.32e-52	4.9e-50
WBGene00199950	4.60518	4.52338	1.99603	2.26619	0.02344	0.0386801
WBGene00201521	16.3666	4.51915	0.950176	4.75612	1.97e-06	5.84e-06
WBGene00196962	9.40065	4.49603	1.6849	2.66842	0.0076209	0.0137761
WBGene00045152	4.5366	4.48619	1.83233	2.44836	0.0143509	0.0246517
WBGene00023128	4.55371	4.47967	1.7446	2.56773	0.0102367	0.0180894
WBGene00219630	17.8312	4.4717	1.20121	3.72265	0.000197146	0.000456386
WBGene00201456	11.3426	4.47011	1.35835	3.29084	0.000998884	0.00208711
WBGene00220065	2.40825	4.46003	2.0181	2.21001	0.0271043	0.0441799
WBGene00014513	35.9887	4.45812	0.606645	7.34881	2e-13	1.12e-12
WBGene00004836	9.02619	4.44333	1.2509	3.5521	0.000382175	0.000849697
WBGene00023401	227.037	4.44059	0.49478	8.97488	2.84e-19	2.42e-18
WBGene00014492	6.56758	4.4365	1.24453	3.56481	0.000364124	0.000811086
WBGene00077465	4.45807	4.4353	1.52392	2.91046	0.00360902	0.00690509
WBGene00006651	129883	4.43235	0.33786	13.1189	2.57e-39	6.86e-38
WBGene00199056	8.65387	4.42356	1.1944	3.70358	0.000212579	0.000489848
WBGene00077475	15.3302	4.4053	1.01094	4.35762	1.31e-05	3.52e-05
WBGene00197209	12.7505	4.40503	1.00974	4.36253	1.29e-05	3.45e-05
WBGene00196827	6.47669	4.39659	1.3675	3.21506	0.00130418	0.00267901
WBGene00198571	10.6127	4.39005	1.22289	3.58991	0.000330795	0.000741317
WBGene00198101	16.4939	4.38384	1.10033	3.98413	6.77e-05	0.000166484
WBGene00198826	4.28637	4.36695	1.71714	2.54315	0.0109859	0.0193086
WBGene00219930	6.33987	4.3445	1.62094	2.68023	0.00735719	0.0133358
WBGene00196830	41.4581	4.33303	0.824416	5.25587	1.47e-07	4.89e-07
WBGene00050903	118.358	4.33049	0.419521	10.3225	5.58e-25	6.68e-24
WBGene00219816	8.14035	4.32644	1.38197	3.13063	0.00174431	0.0035095
WBGene00195613	6.13883	4.31709	1.68047	2.56898	0.0101999	0.0180285
WBGene00201308	5.92241	4.29488	1.50133	2.86072	0.00422682	0.00799362
WBGene00195586	10.2474	4.29124	1.31458	3.26434	0.00109719	0.0022794
WBGene00198153	10.2474	4.29124	1.31458	3.26434	0.00109719	0.0022794
WBGene00194836	731.532	4.28706	0.391412	10.9528	6.44e-28	9.19e-27
WBGene00014991	60.2001	4.28599	0.573855	7.46878	8.09e-14	4.69e-13
WBGene00006344	39.6964	4.27497	0.70184	6.09109	1.12e-09	4.57e-09
WBGene00197511	5.99258	4.26898	1.41611	3.01457	0.0025734	0.00503413
WBGene00003328	5.99134	4.24161	1.70236	2.4916	0.0127171	0.0220893
WBGene00196024	91.5862	4.24154	0.47404	8.94766	3.63e-19	3.06e-18
WBGene00195494	7.63338	4.2323	1.32214	3.20109	0.00136907	0.00280185
WBGene00200947	7.72763	4.22736	1.23459	3.42409	0.000616857	0.00132858
WBGene00045145	3.88528	4.22601	1.57607	2.68135	0.00733251	0.0132943
WBGene00202479	15.2187	4.21396	0.906893	4.64659	3.37e-06	9.7e-06
WBGene00172963	7.69753	4.21385	1.25808	3.34944	0.000809755	0.00171388
WBGene00077487	7.64042	4.20373	1.18544	3.54614	0.000390913	0.000867755
WBGene00199752	3.769	4.20356	1.84906	2.27335	0.0230052	0.0380296
WBGene00202383	13.3515	4.19991	1.10944	3.7856	0.000153341	0.000359824
WBGene00197033	20.2743	4.18769	0.850426	4.92423	8.47e-07	2.61e-06
WBGene00201045	20.5698	4.1842	0.770128	5.43313	5.54e-08	1.92e-07
WBGene00200725	3.79624	4.17139	1.79103	2.32905	0.0198564	0.0332292
WBGene00045118	14.659	4.16592	0.839725	4.96105	7.01e-07	2.17e-06
WBGene00197023	14.8098	4.16244	1.05418	3.94852	7.86e-05	0.000191527
WBGene00201373	3.68987	4.15879	1.70398	2.44063	0.0146615	0.0251583
WBGene00197582	5.67106	4.15621	1.57844	2.63312	0.00846042	0.0151695
WBGene00004567	6271.14	4.15498	0.235333	17.6557	9.2e-70	1.2e-67
WBGene00219940	27.4088	4.15097	0.703042	5.9043	3.54e-09	1.38e-08
WBGene00201695	18.2391	4.1496	0.735895	5.63884	1.71e-08	6.27e-08
WBGene00005825	801.83	4.1483	0.407796	10.1725	2.63e-24	3.03e-23
WBGene00195378	18.1396	4.14004	0.829476	4.99115	6e-07	1.87e-06
WBGene00197424	12.5866	4.13875	0.858772	4.81938	1.44e-06	4.33e-06
WBGene00045142	12.5003	4.13669	1.11258	3.71809	0.000200738	0.000464273
WBGene00198885	3.55107	4.12945	1.63951	2.51871	0.0117784	0.0205874
WBGene00198112	7.01803	4.12756	1.52737	2.70239	0.00688425	0.0125432
WBGene00219755	245.516	4.12088	0.438224	9.40359	5.27e-21	4.96e-20
WBGene00045132	14.2521	4.1115	0.932481	4.4092	1.04e-05	2.81e-05
WBGene00201660	10.4303	4.08474	0.979903	4.16851	3.07e-05	7.85e-05
WBGene00196068	7.0646	4.08295	1.34152	3.04353	0.00233818	0.00460762
WBGene00195385	57.319	4.07536	0.765728	5.3222	1.03e-07	3.46e-07
WBGene00006315	76.9433	4.07527	0.59871	6.80674	9.98e-12	4.89e-11
WBGene00198681	25.6552	4.06971	0.652687	6.23531	4.51e-10	1.9e-09
WBGene00219841	20.7247	4.06153	0.780865	5.20132	1.98e-07	6.48e-07
WBGene00196721	21.9935	4.04999	0.733091	5.52454	3.3e-08	1.17e-07
WBGene00200025	5.12424	4.04026	1.6772	2.40893	0.0159996	0.027255
WBGene00201193	5.02934	4.03687	1.37653	2.93263	0.003361	0.00645761
WBGene00200218	5.02934	4.03687	1.37653	2.93263	0.003361	0.00645761
WBGene00050977	37.463	4.03194	0.861152	4.68203	2.84e-06	8.24e-06
WBGene00219936	21.6862	4.02713	0.79288	5.07911	3.79e-07	1.2e-06
WBGene00196015	13.3358	4.02556	0.885555	4.5458	5.47e-06	1.53e-05
WBGene00219708	122.475	4.02279	0.319382	12.5955	2.23e-36	5.14e-35
WBGene00197477	11.5103	4.00555	1.70849	2.3445	0.0190527	0.0319817
WBGene00198394	17.9354	3.98527	0.92885	4.29054	1.78e-05	4.7e-05
WBGene00196872	16.1037	3.98406	0.820811	4.85381	1.21e-06	3.67e-06
WBGene00200365	3.30258	3.97807	1.61777	2.45898	0.0139333	0.0240066
WBGene00198852	8.22541	3.97565	1.24521	3.19275	0.00140926	0.00287834
WBGene00195060	704.685	3.97207	0.306826	12.9457	2.49e-38	6.36e-37
WBGene00197406	22.786	3.97132	0.955898	4.15454	3.26e-05	8.32e-05
WBGene00195840	18.1512	3.96948	0.904573	4.38824	1.14e-05	3.08e-05
WBGene00003314	62.7485	3.96769	0.432931	9.16474	4.97e-20	4.44e-19
WBGene00201124	4.81347	3.96761	1.40497	2.82398	0.00474307	0.00889005
WBGene00199106	4.86631	3.96557	1.31623	3.01282	0.0025883	0.00505932
WBGene00023135	3.26199	3.96198	1.6744	2.36621	0.0179713	0.0303178
WBGene00201103	3.19594	3.95789	1.66897	2.37145	0.0177183	0.0299247
WBGene00199944	6.49756	3.95272	1.31122	3.01453	0.00257378	0.00503444
WBGene00049888	15.8392	3.94486	0.765173	5.15551	2.53e-07	8.18e-07
WBGene00172042	4.76861	3.94149	1.29249	3.04953	0.00229198	0.00452529
WBGene00017370	312.603	3.93709	0.518467	7.59373	3.11e-14	1.86e-13
WBGene00199488	18.7997	3.93597	0.937479	4.19846	2.69e-05	6.95e-05
WBGene00201654	4.66527	3.92906	1.42455	2.75811	0.00581373	0.0107333
WBGene00199229	12.417	3.92141	0.990318	3.95975	7.5e-05	0.000183339
WBGene00220030	6.27096	3.91951	1.2415	3.15709	0.00159352	0.00322776
WBGene00271632	460.552	3.91613	0.219625	17.8309	4.06e-71	5.76e-69
WBGene00045164	47.0959	3.91495	0.516996	7.57249	3.66e-14	2.18e-13
WBGene00050961	4.83548	3.90881	1.65615	2.36018	0.0182662	0.0307693
WBGene00198950	9.33813	3.90692	1.06881	3.6554	0.000256781	0.000583757
WBGene00220113	9.05041	3.89925	1.13379	3.43914	0.000583558	0.00126181
WBGene00220106	12.0037	3.88851	1.10482	3.5196	0.000432199	0.000952639
WBGene00196575	6.06001	3.8875	1.39839	2.77998	0.00543618	0.0100893
WBGene00196303	43.0226	3.88749	0.747895	5.19791	2.02e-07	6.59e-07
WBGene00200277	3.14079	3.88747	1.78701	2.17541	0.0295996	0.0478765
WBGene00202165	62.5168	3.88745	0.676158	5.74933	8.96e-09	3.37e-08
WBGene00236799	4.52746	3.86639	1.74967	2.20979	0.0271199	0.044198
WBGene00014518	2.98489	3.8648	1.68523	2.29334	0.0218287	0.036231
WBGene00201060	2.99589	3.82932	1.68696	2.26995	0.0232106	0.0383297
WBGene00198241	14.5239	3.82871	0.979597	3.90845	9.29e-05	0.000224233
WBGene00009972	218.03	3.82861	0.453949	8.434	3.34e-17	2.49e-16
WBGene00003286	14.7906	3.82356	0.837075	4.56776	4.93e-06	1.39e-05
WBGene00011448	1106.66	3.82242	0.233567	16.3654	3.38e-60	2.64e-58
WBGene00196816	8.73232	3.80415	0.980436	3.88006	0.000104431	0.000250376
WBGene00220234	11.5082	3.78974	0.857398	4.42004	9.87e-06	2.68e-05
WBGene00219609	760.716	3.78402	0.448011	8.44627	3.01e-17	2.25e-16
WBGene00201998	8.76764	3.77697	1.31987	2.86164	0.00421462	0.00797255
WBGene00045012	10.0602	3.77645	0.974268	3.87619	0.000106106	0.000253987
WBGene00196021	8.60414	3.77096	1.17774	3.20185	0.00136546	0.00279547
WBGene00198566	4.31481	3.76282	1.60055	2.35096	0.0187251	0.0314906
WBGene00023429	90.3037	3.76196	0.403212	9.32996	1.06e-20	9.8e-20
WBGene00077469	4.24302	3.75829	1.35331	2.7771	0.00548461	0.0101733
WBGene00199053	4.23641	3.75625	1.33114	2.82183	0.00477502	0.00894398
WBGene00197934	4.28595	3.75543	1.52112	2.46885	0.0135547	0.0234071
WBGene00045123	4.24178	3.74458	1.44237	2.59613	0.00942816	0.0167631
WBGene00201901	14.3419	3.74007	1.12212	3.33304	0.000859023	0.00181237
WBGene00169426	6.85626	3.71685	1.07756	3.44931	0.000562013	0.00121928
WBGene00196832	8.04973	3.7163	1.15424	3.2197	0.00128324	0.00263803
WBGene00022910	9225.76	3.71398	0.214794	17.2909	5.51e-67	6.05e-65
WBGene00003433	13.874	3.71013	0.915267	4.05361	5.04e-05	0.000125931
WBGene00195274	47.6948	3.7046	1.50798	2.45666	0.0140235	0.0241371
WBGene00198520	6.83094	3.7008	1.28102	2.88896	0.0038652	0.00735916
WBGene00023193	22.0289	3.69861	0.819945	4.5108	6.46e-06	1.79e-05
WBGene00199751	13.4456	3.69404	0.786019	4.69968	2.61e-06	7.6e-06
WBGene00199855	5.28607	3.68669	1.33116	2.76953	0.00561381	0.0103881
WBGene00009206	41.4512	3.68296	0.586074	6.28412	3.3e-10	1.4e-09
WBGene00200047	5.40014	3.68088	1.19194	3.08815	0.00201406	0.00401243
WBGene00195000	4.06522	3.6669	1.67881	2.18422	0.0289458	0.0469031
WBGene00201219	27.9293	3.6649	0.887519	4.12938	3.64e-05	9.24e-05
WBGene00219566	26.6118	3.65605	1.23394	2.96291	0.00304742	0.00589537
WBGene00198289	3.91445	3.65146	1.48585	2.45748	0.0139915	0.0240893
WBGene00197956	3.85501	3.65007	1.57028	2.32447	0.0201002	0.0335923
WBGene00202419	12.9965	3.64956	0.849495	4.29616	1.74e-05	4.59e-05
WBGene00220021	11.4625	3.64224	1.41175	2.57995	0.00988156	0.0175099
WBGene00166765	3.92312	3.63995	1.34878	2.6987	0.00696099	0.0126758
WBGene00202095	11.784	3.63577	0.935834	3.88506	0.000102305	0.000245645
WBGene00044952	40.0891	3.63261	0.57563	6.31067	2.78e-10	1.19e-09
WBGene00200121	28.6367	3.62365	0.812817	4.45814	8.27e-06	2.27e-05
WBGene00004833	5.27441	3.61931	1.58464	2.28399	0.0223719	0.0370588
WBGene00045091	7.71454	3.61897	1.04706	3.45633	0.000547585	0.0011902
WBGene00201882	10.216	3.60935	0.96774	3.72967	0.000191728	0.000444576
WBGene00021889	15.1953	3.60673	1.14004	3.1637	0.00155778	0.00315991
WBGene00045162	22.1091	3.59652	0.869643	4.13562	3.54e-05	9e-05
WBGene00044936	7.46607	3.59114	1.15279	3.11517	0.00183839	0.00368693
WBGene00220075	5.00872	3.57676	1.44129	2.48164	0.0130781	0.0226552
WBGene00045074	22.8245	3.56896	0.820653	4.34893	1.37e-05	3.66e-05
WBGene00199880	9.98439	3.56751	0.888927	4.01328	5.99e-05	0.000148107
WBGene00196157	51.4577	3.55934	0.564825	6.30166	2.94e-10	1.26e-09
WBGene00194652	17.8823	3.5536	1.07478	3.30635	0.000945183	0.00198226
WBGene00196944	42.9346	3.54906	0.542093	6.54695	5.87e-11	2.68e-10
WBGene00198419	13.5436	3.54122	0.801512	4.41818	9.95e-06	2.71e-05
WBGene00196322	9.86246	3.53252	0.986262	3.58173	0.000341327	0.000763478
WBGene00198728	9.47299	3.52881	1.15223	3.06259	0.00219432	0.00434772
WBGene00194856	928.224	3.52845	0.209516	16.8409	1.22e-63	1.16e-61
WBGene00219304	1329.24	3.5231	0.249332	14.1301	2.48e-45	9.41e-44
WBGene00202361	6.00871	3.52015	1.11354	3.16123	0.00157104	0.00318479
WBGene00199982	9.41135	3.51413	1.21538	2.89137	0.00383563	0.00730596
WBGene00014505	88606.8	3.51315	0.343294	10.2337	1.4e-24	1.64e-23
WBGene00201908	4.70668	3.50883	1.4082	2.49171	0.012713	0.022084
WBGene00195639	15.7582	3.50343	0.849404	4.12457	3.71e-05	9.42e-05
WBGene00045097	220.16	3.50185	0.392674	8.91794	4.75e-19	3.98e-18
WBGene00198960	14.3242	3.5016	0.891369	3.92835	8.55e-05	0.000207317
WBGene00023472	2065.92	3.49888	0.227551	15.3763	2.36e-53	1.34e-51
WBGene00195453	21.3467	3.49844	0.735458	4.75682	1.97e-06	5.82e-06
WBGene00220121	21.3404	3.49796	0.808995	4.32383	1.53e-05	4.08e-05
WBGene00198196	5.91994	3.49167	1.19559	2.92046	0.00349517	0.00669996
WBGene00020991	7.00418	3.48998	1.24753	2.79751	0.00514975	0.00959877
WBGene00202490	4.69309	3.48966	1.44206	2.41991	0.0155242	0.0265153
WBGene00021100	9.53362	3.48358	1.15641	3.01241	0.00259186	0.00506498
WBGene00014946	46.3409	3.48224	0.477077	7.29912	2.9e-13	1.61e-12
WBGene00195820	10.6312	3.47047	0.915493	3.79083	0.000150146	0.000352769
WBGene00195785	14.2517	3.46703	0.96731	3.58419	0.000338121	0.000756682
WBGene00008674	4.64135	3.4584	1.24747	2.77233	0.00556561	0.0103074
WBGene00219711	641.849	3.45776	0.261116	13.2423	5e-40	1.39e-38
WBGene00009309	169.845	3.45666	0.475296	7.27264	3.53e-13	1.94e-12
WBGene00255580	26.5978	3.4506	0.584457	5.90393	3.55e-09	1.39e-08
WBGene00044927	51.7869	3.44741	0.434433	7.93542	2.1e-15	1.38e-14
WBGene00195192	21.8458	3.44086	0.747285	4.60448	4.13e-06	1.18e-05
WBGene00023467	4.60942	3.44064	1.45174	2.37001	0.0177878	0.0300308
WBGene00196216	9.3078	3.43453	1.48027	2.32021	0.0203294	0.0339325
WBGene00198767	16.1471	3.43112	1.12918	3.03858	0.00237698	0.00467916
WBGene00077570	142.22	3.42836	0.528035	6.49269	8.43e-11	3.81e-10
WBGene00077480	3.44473	3.42655	1.41836	2.41585	0.0156986	0.0267949
WBGene00045148	13.5359	3.42192	0.921007	3.71541	0.000202872	0.000468775
WBGene00049470	4.49645	3.42086	1.25688	2.7217	0.00649476	0.0118903
WBGene00220033	18.0434	3.4207	0.99283	3.44541	0.000570199	0.00123565
WBGene00077535	49.4889	3.41992	1.11777	3.0596	0.00221635	0.00438673
WBGene00197509	5.85203	3.41792	1.49146	2.29167	0.021925	0.0363774
WBGene00198146	4.56456	3.41605	1.2932	2.64155	0.00825286	0.0148209
WBGene00014404	4.56456	3.41605	1.2932	2.64155	0.00825286	0.0148209
WBGene00014316	12.4146	3.41172	0.815603	4.18307	2.88e-05	7.39e-05
WBGene00199900	6.85985	3.40657	1.1139	3.05824	0.00222643	0.00440475
WBGene00269390	50.7391	3.39998	0.549083	6.1921	5.94e-10	2.48e-09
WBGene00195823	9.10379	3.39439	1.09142	3.11007	0.00187045	0.00374388
WBGene00199514	4.44471	3.39288	1.46409	2.31739	0.0204823	0.0341725
WBGene00219693	33.7081	3.39172	0.68829	4.92774	8.32e-07	2.56e-06
WBGene00201966	12.3345	3.38815	1.03805	3.26397	0.00109864	0.00228199
WBGene00196969	35.3276	3.38159	0.651803	5.18805	2.13e-07	6.93e-07
WBGene00201151	3.35596	3.37866	1.54194	2.19117	0.0284394	0.0461523
WBGene00197072	12.1653	3.37216	0.933603	3.61199	0.000303861	0.000684637
WBGene00198952	14.0478	3.35382	0.896218	3.74219	0.000182423	0.000424352
WBGene00215616	185.336	3.35247	0.30762	10.8981	1.18e-27	1.65e-26
WBGene00077488	4.32805	3.35066	1.2577	2.66412	0.00771904	0.0139445
WBGene00219898	7.52395	3.34855	1.52614	2.19413	0.0282262	0.0458426
WBGene00202001	59.9638	3.3458	0.433494	7.71823	1.18e-14	7.3e-14
WBGene00196712	6.42627	3.34526	1.34496	2.48726	0.0128731	0.0223396
WBGene00199851	6.40608	3.33141	1.23351	2.70075	0.00691837	0.0126033
WBGene00197842	11.8793	3.32726	0.831787	4.00014	6.33e-05	0.000156147
WBGene00004041	377.821	3.32133	0.476891	6.96454	3.29e-12	1.68e-11
WBGene00200827	12.778	3.31971	0.800824	4.14537	3.39e-05	8.65e-05
WBGene00219830	20.3622	3.31835	0.935918	3.54555	0.000391791	0.000869445
WBGene00219912	132.358	3.3169	0.499216	6.64423	3.05e-11	1.43e-10
WBGene00201372	18.268	3.31523	0.760127	4.36141	1.29e-05	3.46e-05
WBGene00003308	4.28195	3.31422	1.34847	2.45777	0.0139804	0.0240758
WBGene00198964	4.28195	3.31422	1.34847	2.45777	0.0139804	0.0240758
WBGene00219642	31.6345	3.31316	1.04289	3.17691	0.00148853	0.00302953
WBGene00199866	10.5444	3.31131	0.942799	3.51222	0.000444387	0.000978356
WBGene00194681	769.971	3.29819	0.237169	13.9065	5.78e-44	2.05e-42
WBGene00220089	437.854	3.29343	0.312555	10.5371	5.83e-26	7.43e-25
WBGene00197175	7.25989	3.29012	1.31168	2.50833	0.0121304	0.0211552
WBGene00201538	64.8976	3.28515	0.494525	6.64304	3.07e-11	1.44e-10
WBGene00199520	8.26162	3.2834	0.988897	3.32026	0.000899327	0.00189173
WBGene00202423	66.4961	3.27926	0.769498	4.26156	2.03e-05	5.32e-05
WBGene00003324	9.27948	3.27336	0.973697	3.36178	0.000774413	0.00164255
WBGene00020885	84.7949	3.26941	0.740182	4.41703	1e-05	2.72e-05
WBGene00022951	76505.4	3.26786	0.253272	12.9026	4.35e-38	1.1e-36
WBGene00048866	4.11576	3.26506	1.30754	2.4971	0.0125213	0.0217813
WBGene00014403	3.08753	3.26229	1.46183	2.23164	0.0256384	0.0419819
WBGene00220124	29.427	3.2605	0.942105	3.46086	0.00053845	0.00117158
WBGene00046538	3.08093	3.25973	1.42774	2.28315	0.0224218	0.037136
WBGene00219894	5.16431	3.25951	1.38843	2.34762	0.0188939	0.0317436
WBGene00197231	7.17435	3.2554	1.12376	2.8969	0.00376874	0.00718524
WBGene00045168	217.003	3.25417	0.45854	7.0968	1.28e-12	6.72e-12
WBGene00219885	4.06856	3.25079	1.29422	2.51177	0.0120126	0.020966
WBGene00050397	10.1853	3.24639	0.845348	3.8403	0.000122882	0.000292155
WBGene00195005	10.0393	3.23859	0.898406	3.60482	0.00031237	0.000702263
WBGene00271634	9.07356	3.23761	0.96348	3.36033	0.000778486	0.00165065
WBGene00014291	7.15595	3.23473	1.07297	3.01473	0.00257207	0.00503241
WBGene00197486	6.17849	3.23418	1.22833	2.63299	0.00846365	0.0151741
WBGene00010921	60.0613	3.23	0.700717	4.60956	4.04e-06	1.15e-05
WBGene00199612	4.0336	3.22853	1.44226	2.23852	0.0251871	0.041306
WBGene00196780	18.0782	3.22662	0.720022	4.48127	7.42e-06	2.04e-05
WBGene00201133	5.1254	3.2246	1.30678	2.46759	0.0136026	0.0234845
WBGene00195803	22.9337	3.22342	1.01729	3.16864	0.00153152	0.00310916
WBGene00201933	6.99701	3.22112	1.03124	3.12355	0.00178686	0.0035887
WBGene00219865	10.9051	3.2189	0.873263	3.68606	0.000227755	0.000522519
WBGene00200594	8.03597	3.21735	1.04064	3.09171	0.00199005	0.00396777
WBGene00196066	9.10044	3.21573	1.44557	2.22454	0.0261122	0.0426992
WBGene00199040	25.8158	3.21412	0.669634	4.79982	1.59e-06	4.75e-06
WBGene00199676	9.02264	3.21306	0.967256	3.32183	0.000894294	0.00188237
WBGene00007084	232.04	3.20659	0.364141	8.8059	1.3e-18	1.06e-17
WBGene00021050	65470.9	3.20578	0.354066	9.05418	1.38e-19	1.2e-18
WBGene00045093	6.94049	3.2046	1.04781	3.05838	0.00222536	0.00440301
WBGene00199006	3.97856	3.201	1.28886	2.48359	0.0130065	0.0225451
WBGene00195728	7.90367	3.19169	1.15587	2.7613	0.00575724	0.0106351
WBGene00173119	5.84622	3.1865	1.08703	2.93137	0.0033747	0.00648006
WBGene00200282	9.86719	3.16541	0.992972	3.18781	0.00143352	0.00292471
WBGene00196878	5.81662	3.16307	1.14127	2.77153	0.00557942	0.0103304
WBGene00219606	75.1531	3.15181	0.387638	8.1308	4.26e-16	2.94e-15
WBGene00219959	22.7935	3.1451	0.747839	4.20558	2.6e-05	6.74e-05
WBGene00219907	78.6167	3.14335	0.623016	5.04538	4.53e-07	1.43e-06
WBGene00200032	8.49785	3.14324	1.0505	2.99213	0.00277038	0.00539139
WBGene00195016	489.274	3.1423	0.346317	9.0735	1.15e-19	1.01e-18
WBGene00219719	28.7286	3.14136	0.605265	5.19006	2.1e-07	6.86e-07
WBGene00197864	18.3993	3.14097	0.792255	3.9646	7.35e-05	0.000179828
WBGene00200265	18.3993	3.14097	0.792255	3.9646	7.35e-05	0.000179828
WBGene00200266	15.0512	3.14034	0.849141	3.69826	0.000217087	0.000499264
WBGene00201078	4.73533	3.13418	1.2077	2.59517	0.00945434	0.0168057
WBGene00199878	10.2545	3.12799	1.11303	2.81034	0.00494886	0.00924729
WBGene00023453	4.69803	3.12471	1.21113	2.58	0.00988015	0.0175087
WBGene00049922	3.75196	3.12451	1.29699	2.40905	0.0159942	0.0272478
WBGene00219605	544.637	3.11959	0.458595	6.80248	1.03e-11	5.02e-11
WBGene00013640	910.141	3.11941	0.203445	15.3329	4.61e-53	2.58e-51
WBGene00167321	3.81016	3.11932	1.31879	2.36529	0.0180159	0.0303863
WBGene00198278	5.71341	3.11701	1.28328	2.42894	0.015143	0.0259055
WBGene00194759	39.1882	3.11573	0.639573	4.87157	1.11e-06	3.37e-06
WBGene00199016	8.43155	3.11058	1.1543	2.69478	0.00704346	0.0128175
WBGene00195588	4.64093	3.10959	1.17561	2.64509	0.00816695	0.0146842
WBGene00220053	14.0998	3.10936	0.817822	3.80201	0.00014353	0.000338177
WBGene00049340	3.70146	3.10869	1.30582	2.38065	0.0172824	0.0292609
WBGene00200075	5.46385	3.09336	1.24513	2.48436	0.0129785	0.0225053
WBGene00195623	25.3947	3.08338	0.68819	4.48042	7.45e-06	2.05e-05
WBGene00198213	10.9212	3.08317	0.873406	3.53005	0.000415475	0.000917753
WBGene00196057	4.61463	3.08184	1.26557	2.43514	0.0148861	0.0255047
WBGene00220017	11.1058	3.07707	1.05505	2.91653	0.00353948	0.00677971
WBGene00219740	7.93114	3.07419	1.41534	2.17205	0.0298518	0.048267
WBGene00196502	6.41724	3.06874	1.10065	2.78811	0.0053017	0.00985833
WBGene00197714	9.12446	3.06694	0.865593	3.54316	0.000395356	0.00087658
WBGene00198634	9.97321	3.06679	0.979668	3.13044	0.00174544	0.00351146
WBGene00219681	72.5506	3.05915	0.502063	6.09316	1.11e-09	4.51e-09
WBGene00197667	11.5428	3.05761	1.07906	2.83358	0.00460292	0.0086504
WBGene00197672	8.34222	3.05456	1.14102	2.67704	0.00742761	0.0134548
WBGene00045088	8.16686	3.04356	1.08403	2.80764	0.00499054	0.0093244
WBGene00196374	6.26546	3.03884	1.05202	2.88856	0.00387006	0.00736594
WBGene00197520	52.9896	3.03155	0.578436	5.24095	1.6e-07	5.28e-07
WBGene00199473	9.67592	3.02205	0.957945	3.15472	0.00160651	0.00325143
WBGene00044226	9.5806	3.00139	0.956655	3.13738	0.00170464	0.00343521
WBGene00199485	12.2372	3.00131	0.817958	3.66927	0.000243245	0.000555283
WBGene00196854	106.698	2.99953	0.593242	5.05616	4.28e-07	1.35e-06
WBGene00014317	7.83083	2.9941	0.977874	3.06185	0.00219976	0.00435697
WBGene00201282	6.18082	2.99257	1.30011	2.30179	0.0213471	0.0355076
WBGene00046489	3.43536	2.98705	1.3386	2.23147	0.0256498	0.0419974
WBGene00044929	39.0088	2.98701	0.489502	6.10215	1.05e-09	4.28e-09
WBGene00196687	19.2291	2.98266	0.797081	3.74198	0.000182576	0.000424666
WBGene00172198	3.4476	2.97845	1.34135	2.22049	0.0263858	0.0431086
WBGene00007120	4627.98	2.9711	0.259897	11.4318	2.9e-30	4.74e-29
WBGene00198445	6.85103	2.97058	1.02895	2.88701	0.00388918	0.00740046
WBGene00200555	15.387	2.96961	0.978235	3.03568	0.00239994	0.00472022
WBGene00196563	16.1515	2.96741	0.763876	3.88467	0.000102469	0.000246012
WBGene00219687	6.93267	2.96084	1.36212	2.17369	0.0297281	0.0480773
WBGene00220052	6.00527	2.95995	1.0854	2.72706	0.00639024	0.0117094
WBGene00050920	381.261	2.9592	0.239869	12.3367	5.74e-35	1.24e-33
WBGene00198986	6.0599	2.95621	1.10203	2.68251	0.00730725	0.0132549
WBGene00200133	5.94941	2.95519	1.16219	2.54277	0.0109979	0.0193267
WBGene00271633	115.388	2.92229	0.342965	8.52067	1.59e-17	1.21e-16
WBGene00014934	10.0763	2.92146	0.85622	3.41205	0.000644766	0.00138459
WBGene00195519	5.89371	2.92026	1.17294	2.48969	0.0127853	0.0221976
WBGene00195421	7.56183	2.91408	1.13098	2.5766	0.00997786	0.0176624
WBGene00166467	6.68704	2.91126	1.0035	2.90111	0.00371846	0.0070996
WBGene00196124	9.07326	2.90965	0.85816	3.39057	0.000697478	0.00149025
WBGene00047399	10.7084	2.90511	0.853709	3.40293	0.000666666	0.00142794
WBGene00005840	219.1	2.89857	0.25394	11.4144	3.54e-30	5.78e-29
WBGene00197663	14.6654	2.89432	0.764956	3.78364	0.000154549	0.000362623
WBGene00201513	18.9053	2.89092	0.65188	4.43474	9.22e-06	2.51e-05
WBGene00200379	4.92627	2.88778	1.22201	2.36315	0.0181205	0.0305537
WBGene00200645	82.3756	2.88477	0.553289	5.21385	1.85e-07	6.08e-07
WBGene00044040	88.1497	2.88166	0.381155	7.56034	4.02e-14	2.39e-13
WBGene00198697	24.6431	2.88061	0.691673	4.1647	3.12e-05	7.98e-05
WBGene00005982	7.55287	2.87994	1.28442	2.24222	0.0249474	0.0409546
WBGene00022982	84.8236	2.87333	0.326541	8.79929	1.38e-18	1.13e-17
WBGene00194768	145.371	2.87133	1.24341	2.30924	0.0209303	0.0348478
WBGene00045095	32.1919	2.8691	0.625222	4.58894	4.46e-06	1.26e-05
WBGene00220073	17.0688	2.86846	0.838555	3.42072	0.000624565	0.00134415
WBGene00014731	27.4205	2.86219	0.5936	4.82175	1.42e-06	4.28e-06
WBGene00220071	8.05933	2.85673	0.981547	2.91044	0.00360923	0.00690509
WBGene00201183	10.2596	2.84546	1.00037	2.84442	0.0044493	0.00838231
WBGene00196344	12.4745	2.84076	0.849287	3.34488	0.000823194	0.00174036
WBGene00009055	1007.98	2.83403	0.268763	10.5447	5.37e-26	6.87e-25
WBGene00045388	121.649	2.8259	0.364133	7.76064	8.45e-15	5.27e-14
WBGene00197431	8.75971	2.82545	0.91752	3.07944	0.00207391	0.0041233
WBGene00197192	6.24783	2.8105	1.28477	2.18755	0.0287021	0.046535
WBGene00201748	8.60529	2.80487	1.20049	2.33645	0.019468	0.0326303
WBGene00199557	3.85584	2.80367	1.29279	2.1687	0.0301054	0.0486351
WBGene00196475	12.2687	2.8012	0.851954	3.28797	0.00100911	0.00210731
WBGene00196005	7.56752	2.79356	1.23061	2.27007	0.0232035	0.0383237
WBGene00045163	12.4395	2.79343	1.01291	2.75782	0.0058189	0.0107402
WBGene00219583	56.6287	2.79198	0.428329	6.51831	7.11e-11	3.23e-10
WBGene00201589	17.5906	2.78772	0.864383	3.2251	0.00125928	0.00259247
WBGene00195275	7.52964	2.78709	1.23918	2.24914	0.0245036	0.0403024
WBGene00197523	5.96497	2.78638	1.26739	2.19851	0.0279125	0.0453953
WBGene00046859	3.79544	2.78407	1.26568	2.19966	0.0278308	0.0452701
WBGene00201547	5.37483	2.78185	1.28716	2.16124	0.0306769	0.0494697
WBGene00197228	19.8725	2.77627	1.19865	2.31617	0.0205491	0.0342713
WBGene00166079	6.86208	2.77528	0.984706	2.81838	0.00482661	0.00903235
WBGene00201273	15.0775	2.75964	0.810266	3.40585	0.000659592	0.00141373
WBGene00023306	8.64251	2.73915	1.21499	2.25445	0.0241676	0.0397789
WBGene00022249	49.6651	2.73374	0.56489	4.83942	1.3e-06	3.93e-06
WBGene00196822	10.1272	2.72911	1.1362	2.40195	0.0163077	0.0277358
WBGene00219695	56.8215	2.71504	0.542342	5.00614	5.55e-07	1.74e-06
WBGene00198142	12.2942	2.69519	0.783486	3.44	0.000581713	0.0012583
WBGene00014714	586.575	2.69499	0.291163	9.25596	2.12e-20	1.93e-19
WBGene00194716	56.6824	2.69268	0.508199	5.29847	1.17e-07	3.91e-07
WBGene00201458	13.2132	2.69112	0.973324	2.76488	0.0056944	0.0105294
WBGene00219837	27.4318	2.6825	0.609739	4.39942	1.09e-05	2.94e-05
WBGene00195399	22.9707	2.65641	0.624371	4.25454	2.09e-05	5.48e-05
WBGene00196398	8.49843	2.64516	0.915411	2.88959	0.00385747	0.00734508
WBGene00196611	10.6724	2.64355	0.891527	2.96519	0.00302494	0.00585389
WBGene00219938	9.80289	2.64198	0.854068	3.09341	0.00197869	0.00394653
WBGene00044931	6.15404	2.64179	1.19553	2.20972	0.0271243	0.0441996
WBGene00194997	4.15854	2.63286	1.20802	2.17949	0.0292956	0.0474255
WBGene00045367	12.2802	2.62732	1.07257	2.44956	0.0143029	0.0245785
WBGene00044997	10.4469	2.62708	0.779118	3.37187	0.000746599	0.00158737
WBGene00023066	18.1258	2.62677	0.861101	3.05048	0.00228479	0.00451228
WBGene00011599	580.054	2.62619	0.282137	9.30823	1.3e-20	1.2e-19
WBGene00201165	11.086	2.61954	0.798491	3.28061	0.00103583	0.0021593
WBGene00202041	9.53479	2.61934	0.945719	2.76968	0.00561112	0.010384
WBGene00220046	11.6788	2.6147	0.816588	3.20199	0.00136483	0.00279442
WBGene00220123	15.0999	2.60963	0.727725	3.58601	0.000335779	0.000751814
WBGene00195363	56.0642	2.60244	0.47454	5.48414	4.15e-08	1.46e-07
WBGene00199051	10.0756	2.60147	0.960411	2.7087	0.00675471	0.0123281
WBGene00198296	5.34445	2.56297	1.10838	2.31235	0.0207586	0.0345898
WBGene00220216	42.619	2.55936	0.597386	4.28427	1.83e-05	4.84e-05
WBGene00004513	554886	2.53902	0.303602	8.36301	6.11e-17	4.46e-16
WBGene00045238	187.866	2.52788	0.466372	5.42031	5.95e-08	2.05e-07
WBGene00195854	9.74031	2.51931	0.880664	2.86069	0.00422718	0.00799364
WBGene00014500	10.9393	2.49037	0.928174	2.68308	0.00729468	0.0132353
WBGene00271652	89.8849	2.47814	0.459886	5.38859	7.1e-08	2.44e-07
WBGene00004622	3.05462e+06	2.46865	0.299732	8.2362	1.78e-16	1.25e-15
WBGene00196695	7.03556	2.44583	1.05373	2.32112	0.0202805	0.0338685
WBGene00220108	7.45423	2.43389	0.936247	2.59962	0.00933274	0.0166079
WBGene00219690	18.6556	2.42188	0.707097	3.4251	0.000614572	0.00132379
WBGene00219941	37.3405	2.41643	0.774755	3.11896	0.00181488	0.00364237
WBGene00045169	14.6798	2.41346	0.698618	3.45462	0.000551059	0.00119728
WBGene00195233	726.518	2.41112	0.239541	10.0656	7.84e-24	8.75e-23
WBGene00202011	14.9818	2.40314	0.925974	2.59526	0.00945198	0.0168029
WBGene00019278	1505.95	2.4013	0.270996	8.861	7.93e-19	6.56e-18
WBGene00045062	248.426	2.39311	0.371972	6.43358	1.25e-10	5.53e-10
WBGene00044937	14.9923	2.38721	0.689287	3.46331	0.000533582	0.001162
WBGene00198006	9.69671	2.38268	0.96943	2.45782	0.0139784	0.0240758
WBGene00235109	27.3794	2.37695	0.715297	3.32302	0.000890481	0.0018747
WBGene00018308	80.2397	2.3763	0.432808	5.49042	4.01e-08	1.41e-07
WBGene00219934	9.41547	2.37335	0.993374	2.38918	0.0168859	0.0286369
WBGene00235373	8.93541	2.37107	0.820778	2.88881	0.003867	0.00736157
WBGene00197916	9.58583	2.37107	0.974386	2.4334	0.0149579	0.0256176
WBGene00197585	9.52639	2.36597	0.92684	2.55272	0.0106884	0.0188241
WBGene00200695	7.13199	2.36527	1.00414	2.35551	0.0184971	0.0311326
WBGene00045151	7.56131	2.36296	1.06541	2.21789	0.026562	0.0433704
WBGene00198259	6.47859	2.36218	1.07694	2.19341	0.0282779	0.0459166
WBGene00014854	11.9158	2.35619	0.753751	3.12596	0.00177226	0.0035616
WBGene00014825	13.981	2.33784	0.744848	3.13867	0.00169714	0.00342133
WBGene00171027	7.06157	2.33628	0.888562	2.62928	0.00855661	0.01532
WBGene00004512	449638	2.31755	0.303721	7.6305	2.34e-14	1.42e-13
WBGene00235163	207.132	2.29327	0.31252	7.338	2.17e-13	1.21e-12
WBGene00198945	14.6098	2.29057	0.8454	2.70945	0.00673947	0.0123042
WBGene00044965	218.863	2.28372	0.398561	5.7299	1e-08	3.76e-08
WBGene00197127	43.6189	2.28087	0.657864	3.46708	0.00052614	0.0011469
WBGene00219976	49.5596	2.267	0.577564	3.92511	8.67e-05	0.000209985
WBGene00196914	17.3749	2.26049	0.656809	3.44162	0.000578237	0.00125162
WBGene00014663	64.1177	2.25721	0.594991	3.79369	0.000148426	0.000349033
WBGene00020304	58.5701	2.2499	0.818374	2.74923	0.00597355	0.0110022
WBGene00268212	52.0418	2.23501	0.564528	3.95907	7.52e-05	0.000183822
WBGene00023000	13.1511	2.23445	0.862925	2.58939	0.00961452	0.0170729
WBGene00236798	17.5788	2.2287	0.70646	3.15474	0.00160639	0.00325143
WBGene00199438	8.63011	2.22174	0.93622	2.37309	0.0176399	0.0298124
WBGene00201366	41.5758	2.21283	0.399051	5.54525	2.94e-08	1.05e-07
WBGene00045170	13.8043	2.21088	0.840076	2.63176	0.00849441	0.0152251
WBGene00200330	13.6819	2.20916	0.700979	3.15154	0.00162414	0.00328445
WBGene00022760	140.774	2.20691	0.527871	4.18078	2.91e-05	7.47e-05
WBGene00202400	87.3198	2.20584	0.308908	7.14075	9.28e-13	4.94e-12
WBGene00249826	1458.77	2.19859	0.390003	5.63736	1.73e-08	6.32e-08
WBGene00202059	8.4851	2.18606	0.929728	2.35129	0.0187084	0.0314647
WBGene00220035	24.2536	2.18073	0.700792	3.11181	0.00185944	0.00372483
WBGene00012924	124.082	2.1796	0.469495	4.64243	3.44e-06	9.89e-06
WBGene00201065	20.8464	2.17312	0.792884	2.74078	0.00612938	0.0112717
WBGene00200212	52.7538	2.17282	0.458278	4.74126	2.12e-06	6.26e-06
WBGene00219771	1060.04	2.16493	0.271777	7.96586	1.64e-15	1.09e-14
WBGene00008374	19.5208	2.15759	0.667529	3.2322	0.00122841	0.00253309
WBGene00044800	14.271	2.15175	0.831556	2.58762	0.00966422	0.0171531
WBGene00200953	8.92475	2.15045	0.977633	2.19965	0.0278315	0.0452701
WBGene00014615	36.5368	2.1427	0.727329	2.94599	0.00321925	0.00620432
WBGene00219612	53.1285	2.13453	0.512079	4.16836	3.07e-05	7.86e-05
WBGene00023291	28.1525	2.12253	0.533727	3.97681	6.98e-05	0.000171347
WBGene00007199	44.6933	2.11168	0.480135	4.3981	1.09e-05	2.95e-05
WBGene00004677	260803	2.11147	0.274613	7.68889	1.48e-14	9.1e-14
WBGene00002212	89.1113	2.11029	0.4638	4.54999	5.36e-06	1.5e-05
WBGene00255730	89.2735	2.10436	0.459836	4.57632	4.73e-06	1.34e-05
WBGene00021499	305.625	2.10085	0.569378	3.68973	0.000224492	0.000515296
WBGene00219961	7.7688	2.09589	0.956953	2.19017	0.028512	0.0462568
WBGene00198042	17.4732	2.08939	0.617691	3.38258	0.000718096	0.00153125
WBGene00045175	129.878	2.05082	0.293931	6.97722	3.01e-12	1.54e-11
WBGene00198804	13.9526	2.04923	0.751376	2.7273	0.00638546	0.0117025
WBGene00199437	37.5626	2.04334	0.541102	3.77625	0.000159205	0.000372745
WBGene00219748	571.667	2.02696	0.306275	6.6181	3.64e-11	1.69e-10
WBGene00198648	8.26563	2.01901	0.859818	2.34818	0.0188655	0.0316983
WBGene00011721	9.38507	2.01824	0.92986	2.17047	0.029971	0.0484424
WBGene00269428	13.7746	2.01309	0.923643	2.17951	0.0292938	0.0474255
WBGene00013589	42.3472	2.00401	0.450545	4.44796	8.67e-06	2.37e-05
WBGene00219563	35.1943	2.00157	0.799869	2.50237	0.0123364	0.0214862
WBGene00219751	39.9216	1.99955	0.542875	3.68326	0.000230274	0.000527654
WBGene00014308	41308.8	1.99336	0.222724	8.94993	3.56e-19	3e-18
WBGene00015550	34.3527	1.98755	0.610592	3.25512	0.00113346	0.00234876
WBGene00007715	14.2624	1.98578	0.787337	2.52214	0.0116643	0.0204086
WBGene00201261	8.72421	1.98062	0.844131	2.34634	0.0189588	0.0318431
WBGene00197129	10.687	1.97936	0.886212	2.23351	0.0255154	0.0418078
WBGene00012975	118.55	1.95763	0.395781	4.94624	7.57e-07	2.34e-06
WBGene00201286	13.1572	1.94909	0.687743	2.83403	0.00459649	0.00864048
WBGene00219742	33.6831	1.93299	0.525245	3.68016	0.000233085	0.000533497
WBGene00195257	97.789	1.90651	0.28101	6.78449	1.17e-11	5.67e-11
WBGene00195247	42.4939	1.90195	0.425733	4.46747	7.91e-06	2.17e-05
WBGene00198454	11.5952	1.89538	0.840994	2.25374	0.0242123	0.0398466
WBGene00077636	216.638	1.88697	0.371769	5.07564	3.86e-07	1.23e-06
WBGene00200164	8.10851	1.87482	0.843542	2.22256	0.0262457	0.0428952
WBGene00219448	25.1833	1.87221	0.578735	3.23501	0.00121639	0.00250991
WBGene00044224	935.953	1.86718	0.259996	7.18157	6.89e-13	3.71e-12
WBGene00017956	18.8014	1.86018	0.562357	3.30782	0.000940253	0.00197284
WBGene00255736	33.7271	1.8446	0.680739	2.70971	0.00673422	0.0122958
WBGene00220172	68.3486	1.84208	0.553243	3.3296	0.000869714	0.00183355
WBGene00201964	35.7837	1.80688	0.532441	3.39358	0.000689848	0.00147492
WBGene00219749	286.909	1.80123	0.331788	5.42886	5.67e-08	1.96e-07
WBGene00016086	108.477	1.79957	0.548688	3.27977	0.00103891	0.00216492
WBGene00014975	204.545	1.78846	0.301599	5.92992	3.03e-09	1.19e-08
WBGene00219713	12.378	1.77358	0.717717	2.47114	0.0134681	0.0232665
WBGene00219307	1046.28	1.76693	0.316926	5.57522	2.47e-08	8.9e-08
WBGene00220118	36.6712	1.74211	0.448325	3.88583	0.000101981	0.000244894
WBGene00195877	14.6844	1.73331	0.671695	2.5805	0.00986568	0.0174858
WBGene00219743	121.777	1.73018	0.430536	4.01867	5.85e-05	0.000144919
WBGene00014454	13780.6	1.71348	0.358786	4.77577	1.79e-06	5.32e-06
WBGene00010818	10.6353	1.70647	0.774363	2.20371	0.0275448	0.0448362
WBGene00198725	30.1179	1.7054	0.525823	3.24329	0.00118157	0.00244253
WBGene00220227	80.4619	1.70485	0.440171	3.87314	0.000107441	0.000256963
WBGene00023223	35.2469	1.69786	0.515809	3.29164	0.000996053	0.00208158
WBGene00007066	52.8861	1.69534	0.404757	4.18852	2.81e-05	7.23e-05
WBGene00220236	13.9916	1.68283	0.725293	2.32021	0.0203293	0.0339325
WBGene00235356	262.038	1.66004	0.304491	5.45184	4.99e-08	1.73e-07
WBGene00219659	361.143	1.65632	0.244035	6.78724	1.14e-11	5.56e-11
WBGene00012898	160.137	1.63365	0.513641	3.18052	0.00147013	0.00299396
WBGene00019095	890.431	1.6296	0.177317	9.19031	3.92e-20	3.52e-19
WBGene00050883	31.598	1.62468	0.592814	2.74063	0.00613223	0.0112751
WBGene00219306	25.2524	1.60662	0.557678	2.88091	0.00396523	0.00753605
WBGene00219720	100.241	1.60119	0.343559	4.6606	3.15e-06	9.11e-06
WBGene00200459	30.6798	1.60011	0.597149	2.67958	0.00737137	0.0133583
WBGene00219915	19.0493	1.59758	0.710449	2.24869	0.0245324	0.0403439
WBGene00198122	19.3851	1.59705	0.67612	2.36209	0.0181724	0.0306343
WBGene00206459	679.921	1.5888	0.269385	5.89786	3.68e-09	1.44e-08
WBGene00045279	75.0303	1.58444	0.377526	4.1969	2.71e-05	6.99e-05
WBGene00194814	137.798	1.55714	0.290675	5.35697	8.46e-08	2.88e-07
WBGene00023322	120.379	1.55142	0.351426	4.41464	1.01e-05	2.75e-05
WBGene00009846	138.383	1.54782	0.399025	3.87901	0.000104881	0.000251267
WBGene00013535	62.3615	1.54636	0.415761	3.71934	0.000199741	0.000462108
WBGene00194851	124.079	1.54492	0.286293	5.3963	6.8e-08	2.34e-07
WBGene00197378	60.2793	1.54462	0.478941	3.22507	0.00125944	0.00259255
WBGene00199937	14.3947	1.54313	0.658734	2.34258	0.0191512	0.0321398
WBGene00220246	439.407	1.53774	0.339275	4.53243	5.83e-06	1.63e-05
WBGene00022205	933.028	1.52944	0.266516	5.73865	9.54e-09	3.58e-08
WBGene00196591	19.9107	1.50845	0.690745	2.1838	0.0289771	0.0469504
WBGene00013510	297.542	1.49597	0.225746	6.62678	3.43e-11	1.6e-10
WBGene00220019	2125.94	1.49324	0.250039	5.97204	2.34e-09	9.31e-09
WBGene00014309	340508	1.46872	0.21533	6.82077	9.06e-12	4.45e-11
WBGene00022693	16.4213	1.44815	0.611571	2.36792	0.0178883	0.0301824
WBGene00019789	486.301	1.44626	0.288081	5.02032	5.16e-07	1.62e-06
WBGene00014466	19.9935	1.43098	0.602717	2.37421	0.0175864	0.029731
WBGene00020632	445.147	1.42555	0.297401	4.79336	1.64e-06	4.89e-06
WBGene00014852	19.3086	1.42282	0.609361	2.33493	0.0195469	0.0327527
WBGene00013363	48.3711	1.4043	0.478468	2.93499	0.00333555	0.00641309
WBGene00220090	23.5997	1.39701	0.636545	2.19468	0.0281863	0.0457877
WBGene00050935	77.6654	1.39141	0.323492	4.30122	1.7e-05	4.5e-05
WBGene00206423	1902.87	1.37435	0.26871	5.1146	3.14e-07	1.01e-06
WBGene00014987	292.288	1.37311	0.269756	5.09019	3.58e-07	1.14e-06
WBGene00045202	21.0615	1.37026	0.629112	2.17809	0.0293991	0.0475829
WBGene00017731	259.924	1.36155	0.344334	3.95416	7.68e-05	0.000187329
WBGene00014933	93.8022	1.35211	0.467809	2.89031	0.00384868	0.00732895
WBGene00195043	276.604	1.3515	0.284451	4.75127	2.02e-06	5.97e-06
WBGene00220093	874.429	1.31325	0.300726	4.36692	1.26e-05	3.38e-05
WBGene00023159	57732.6	1.30569	0.254319	5.13408	2.84e-07	9.12e-07
WBGene00014472	19783.6	1.25545	0.291849	4.30171	1.69e-05	4.49e-05
WBGene00195175	774.396	1.24479	0.286944	4.33809	1.44e-05	3.83e-05
WBGene00014728	157.617	1.24277	0.500381	2.48365	0.0130045	0.0225434
WBGene00220171	1024.11	1.23903	0.296754	4.17526	2.98e-05	7.64e-05
WBGene00006650	307821	1.21364	0.29239	4.15077	3.31e-05	8.45e-05
WBGene00219556	1445.64	1.20336	0.204646	5.88019	4.1e-09	1.59e-08
WBGene00235381	120.823	1.19958	0.407034	2.94712	0.00320748	0.00618269
WBGene00189951	227.293	1.19408	0.402337	2.96786	0.00299879	0.00580578
WBGene00220163	284.187	1.19312	0.283321	4.2112	2.54e-05	6.58e-05
WBGene00014947	152.275	1.1908	0.295778	4.02599	5.67e-05	0.000140682
WBGene00005827	101.769	1.18144	0.372519	3.17149	0.0015166	0.00308221
WBGene00050927	971.967	1.17784	0.227343	5.18087	2.21e-07	7.19e-07
WBGene00011369	68.058	1.17299	0.535685	2.18969	0.0285464	0.046306
WBGene00219592	468.884	1.15437	0.246701	4.67921	2.88e-06	8.35e-06
WBGene00219581	106.76	1.1486	0.437736	2.62395	0.00869162	0.0155481
WBGene00201640	35.0258	1.1268	0.486752	2.31493	0.0206168	0.034374
WBGene00220094	1010.64	1.085	0.257417	4.21494	2.5e-05	6.48e-05
WBGene00219904	85.2975	1.07483	0.370352	2.90218	0.00370577	0.00707777
WBGene00014870	144.877	1.07186	0.345596	3.10148	0.00192557	0.00384672
WBGene00044632	31.9596	1.06662	0.446159	2.39067	0.0168176	0.0285255
WBGene00016211	336.639	1.0589	0.46221	2.29096	0.0219659	0.0364425
WBGene00004246	261.017	1.0588	0.341318	3.10211	0.0019215	0.00383993
WBGene00189944	167.232	1.03165	0.339837	3.03573	0.00239954	0.00471985
WBGene00219699	2970.13	1.01587	0.353533	2.87347	0.00405989	0.00770509
WBGene00220004	43.6982	0.979197	0.446337	2.19385	0.0282462	0.0458685
WBGene00021651	92.6834	0.934294	0.344339	2.7133	0.00666171	0.0121751
WBGene00023245	158.701	0.93301	0.334014	2.79333	0.00521692	0.00971512
WBGene00235346	157.038	0.929961	0.320283	2.90356	0.00368949	0.00704787
WBGene00077437	2320.27	0.921979	0.278544	3.30999	0.000932994	0.00195852
WBGene00018326	161.424	0.908674	0.261525	3.47453	0.000511755	0.00111728
WBGene00271642	6619.65	0.872534	0.253673	3.4396	0.000582582	0.00125994
WBGene00014613	566.169	0.850049	0.260591	3.262	0.00110628	0.00229723
WBGene00012974	473.061	0.811922	0.312603	2.59729	0.00939623	0.016713
WBGene00219707	1044.58	0.79765	0.244839	3.25786	0.00112258	0.00232806
WBGene00045077	1328.37	0.787826	0.257924	3.05448	0.00225448	0.00445633
WBGene00219619	167.567	0.718968	0.306588	2.34507	0.0190237	0.0319378
WBGene00013638	1234.03	0.682999	0.15812	4.31951	1.56e-05	4.15e-05

## Sheet: non-coding decreased in muscle
WB_GeneID	baseMean	log2FoldChange	lfcSE	stat	pvalue	padj
WBGene00014821	400.542	-11.341	1.2673	-8.94895	3.59e-19	3.03e-18
WBGene00018992	653.825	-10.1822	1.08689	-9.36826	7.37e-21	6.89e-20
WBGene00018540	142.609	-9.85105	1.28465	-7.66826	1.74e-14	1.06e-13
WBGene00008842	129.685	-9.71416	1.43989	-6.74648	1.51e-11	7.29e-11
WBGene00014759	114.513	-9.53457	1.27721	-7.46518	8.32e-14	4.82e-13
WBGene00045188	113.95	-9.52763	1.50676	-6.32325	2.56e-10	1.1e-09
WBGene00016301	97.8777	-9.30818	1.27186	-7.31858	2.51e-13	1.4e-12
WBGene00009838	95.745	-9.27643	1.25341	-7.40095	1.35e-13	7.7e-13
WBGene00014811	94.8823	-9.26344	1.25917	-7.35676	1.88e-13	1.06e-12
WBGene00009428	82.0873	-9.05408	1.27706	-7.08977	1.34e-12	7.06e-12
WBGene00022545	69.1402	-8.80675	1.28529	-6.85194	7.29e-12	3.61e-11
WBGene00005438	68.7865	-8.79935	1.33692	-6.58183	4.65e-11	2.14e-10
WBGene00013251	62.0156	-8.64985	1.25665	-6.88327	5.85e-12	2.92e-11
WBGene00010294	57.8266	-8.54915	1.27572	-6.70144	2.06e-11	9.82e-11
WBGene00011165	56.9672	-8.52729	1.32186	-6.45096	1.11e-10	4.95e-10
WBGene00077784	56.2142	-8.50763	1.27981	-6.64756	2.98e-11	1.4e-10
WBGene00013612	49.9772	-8.33872	1.27133	-6.55908	5.41e-11	2.48e-10
WBGene00010295	48.1093	-8.28373	1.29356	-6.40385	1.52e-10	6.67e-10
WBGene00014701	48.1098	-8.28342	1.25706	-6.58952	4.41e-11	2.04e-10
WBGene00018664	47.903	-8.27761	1.27912	-6.47132	9.72e-11	4.36e-10
WBGene00015016	45.4418	-8.20138	1.27539	-6.4305	1.27e-10	5.64e-10
WBGene00016230	44.3707	-8.16664	1.2867	-6.34698	2.2e-10	9.51e-10
WBGene00014673	41.9835	-8.08722	1.35741	-5.95782	2.56e-09	1.01e-08
WBGene00009295	41.4662	-8.06948	1.5263	-5.28696	1.24e-07	4.16e-07
WBGene00006939	40.9339	-8.05038	1.27001	-6.33883	2.32e-10	1e-09
WBGene00012568	40.7033	-8.04265	1.28899	-6.23952	4.39e-10	1.85e-09
WBGene00019934	40.155	-8.02217	1.31672	-6.09253	1.11e-09	4.53e-09
WBGene00219772	39.7294	-8.00762	1.2859	-6.22723	4.75e-10	1.99e-09
WBGene00077629	38.5743	-7.96521	1.36918	-5.81752	5.97e-09	2.29e-08
WBGene00020529	38.4227	-7.95941	1.3002	-6.12167	9.26e-10	3.8e-09
WBGene00005972	37.091	-7.90872	1.36511	-5.79347	6.89e-09	2.62e-08
WBGene00020591	36.1785	-7.87207	1.41573	-5.56045	2.69e-08	9.64e-08
WBGene00206531	35.9689	-7.86413	1.3134	-5.98761	2.13e-09	8.49e-09
WBGene00018658	35.1252	-7.83002	1.33634	-5.85928	4.65e-09	1.8e-08
WBGene00014576	34.5165	-7.80496	1.34193	-5.8162	6.02e-09	2.31e-08
WBGene00007821	34.0908	-7.78688	1.29778	-6.00016	1.97e-09	7.89e-09
WBGene00019310	33.0754	-7.74231	1.32951	-5.82345	5.76e-09	2.21e-08
WBGene00017680	31.7732	-7.68542	1.32415	-5.80406	6.47e-09	2.47e-08
WBGene00219686	31.4621	-7.6701	1.37524	-5.57729	2.44e-08	8.8e-08
WBGene00009047	31.3358	-7.66554	1.44861	-5.29166	1.21e-07	4.05e-07
WBGene00013763	396.142	-7.65688	0.615605	-12.438	1.63e-35	3.59e-34
WBGene00007677	375.539	-7.60628	0.764541	-9.94882	2.55e-23	2.77e-22
WBGene00014883	29.7454	-7.58955	1.38957	-5.46179	4.71e-08	1.64e-07
WBGene00020388	28.8464	-7.54555	1.35687	-5.56099	2.68e-08	9.62e-08
WBGene00021606	28.3624	-7.52077	1.30963	-5.74267	9.32e-09	3.5e-08
WBGene00007654	28.0473	-7.50548	1.32884	-5.64813	1.62e-08	5.95e-08
WBGene00005752	27.9143	-7.49791	1.30064	-5.7648	8.18e-09	3.09e-08
WBGene00005998	27.7546	-7.48961	1.3462	-5.5635	2.64e-08	9.49e-08
WBGene00017117	27.3355	-7.46734	1.33591	-5.5897	2.27e-08	8.23e-08
WBGene00020711	27.3325	-7.46721	1.34754	-5.54138	3e-08	1.07e-07
WBGene00011210	26.0708	-7.39913	1.32296	-5.59285	2.23e-08	8.08e-08
WBGene00005677	25.2054	-7.35084	1.32864	-5.53262	3.15e-08	1.12e-07
WBGene00007376	24.724	-7.32333	1.41625	-5.17093	2.33e-07	7.57e-07
WBGene00019107	24.3366	-7.30073	1.40625	-5.19164	2.08e-07	6.81e-07
WBGene00014134	23.2925	-7.23754	1.44028	-5.02511	5.03e-07	1.58e-06
WBGene00013841	249.614	-7.23181	0.832994	-8.68171	3.9e-18	3.1e-17
WBGene00008813	22.8211	-7.20786	1.36089	-5.29645	1.18e-07	3.95e-07
WBGene00194769	1058	-7.18677	0.82124	-8.75112	2.11e-18	1.71e-17
WBGene00010095	22.0251	-7.1562	1.36703	-5.23485	1.65e-07	5.45e-07
WBGene00010390	21.9191	-7.14902	1.36564	-5.23492	1.65e-07	5.45e-07
WBGene00021664	20.7952	-7.0738	1.35604	-5.2165	1.82e-07	5.99e-07
WBGene00014907	20.7585	-7.07051	1.37428	-5.14489	2.68e-07	8.63e-07
WBGene00018666	20.3901	-7.0452	1.34053	-5.25552	1.48e-07	4.9e-07
WBGene00011933	20.316	-7.03955	1.34757	-5.22388	1.75e-07	5.77e-07
WBGene00013715	250.144	-7.0262	0.87717	-8.01007	1.15e-15	7.66e-15
WBGene00017035	19.9552	-7.01414	1.55938	-4.49804	6.86e-06	1.9e-05
WBGene00005772	19.8843	-7.00842	1.37066	-5.11318	3.17e-07	1.01e-06
WBGene00023281	18.938	-6.93828	1.37609	-5.04203	4.61e-07	1.45e-06
WBGene00005371	18.9255	-6.93799	1.37501	-5.04578	4.52e-07	1.43e-06
WBGene00014790	18.6932	-6.91934	1.3519	-5.11825	3.08e-07	9.89e-07
WBGene00194812	18.5198	-6.90646	1.38803	-4.97574	6.5e-07	2.02e-06
WBGene00011585	295.929	-6.90281	0.789133	-8.74734	2.18e-18	1.76e-17
WBGene00010400	295.155	-6.89876	0.785894	-8.77823	1.66e-18	1.35e-17
WBGene00008055	18.2475	-6.88448	1.42655	-4.82596	1.39e-06	4.19e-06
WBGene00023488	35.5271	-6.8719	1.29317	-5.31399	1.07e-07	3.61e-07
WBGene00013995	18.0214	-6.86721	1.38115	-4.97208	6.62e-07	2.06e-06
WBGene00019532	17.7179	-6.8424	1.36508	-5.01246	5.37e-07	1.69e-06
WBGene00012426	17.6838	-6.83905	1.37506	-4.97364	6.57e-07	2.04e-06
WBGene00022082	17.5428	-6.82764	1.3652	-5.00118	5.7e-07	1.78e-06
WBGene00219650	400.293	-6.81338	0.786442	-8.66355	4.57e-18	3.62e-17
WBGene00012418	314.425	-6.80389	0.530443	-12.8268	1.16e-37	2.85e-36
WBGene00014734	16.7406	-6.76024	1.42878	-4.73148	2.23e-06	6.55e-06
WBGene00045076	16.484	-6.73892	1.48772	-4.5297	5.91e-06	1.65e-05
WBGene00044405	16.4068	-6.73192	1.45352	-4.63147	3.63e-06	1.04e-05
WBGene00220088	16.3425	-6.7262	1.43468	-4.68831	2.75e-06	8.01e-06
WBGene00077537	16.0783	-6.70171	1.47792	-4.53456	5.77e-06	1.61e-05
WBGene00016338	15.9022	-6.68668	1.64054	-4.07591	4.58e-05	0.000114919
WBGene00219766	15.8876	-6.68508	1.46028	-4.57796	4.7e-06	1.33e-05
WBGene00020810	15.6398	-6.66226	1.45327	-4.58432	4.55e-06	1.29e-05
WBGene00014835	15.5991	-6.6582	1.38559	-4.80533	1.54e-06	4.63e-06
WBGene00005588	15.3409	-6.63376	1.45452	-4.56079	5.1e-06	1.43e-05
WBGene00019932	535.469	-6.62346	0.63667	-10.4033	2.4e-25	2.93e-24
WBGene00013031	15.2074	-6.62248	1.49193	-4.43888	9.04e-06	2.47e-05
WBGene00012485	15.1231	-6.61456	1.44067	-4.59131	4.4e-06	1.25e-05
WBGene00022658	15.1308	-6.61456	1.44666	-4.57229	4.82e-06	1.36e-05
WBGene00044976	14.8201	-6.58496	1.50652	-4.37098	1.24e-05	3.32e-05
WBGene00020458	14.7706	-6.57935	1.43691	-4.57881	4.68e-06	1.32e-05
WBGene00005485	14.7159	-6.575	1.41218	-4.65593	3.23e-06	9.3e-06
WBGene00045404	129.382	-6.54495	0.883701	-7.4063	1.3e-13	7.42e-13
WBGene00219549	14.4051	-6.5439	1.40784	-4.64818	3.35e-06	9.63e-06
WBGene00008635	27.9539	-6.52507	1.30625	-4.99525	5.88e-07	1.84e-06
WBGene00014818	13.9793	-6.50121	1.74714	-3.72105	0.000198393	0.000459085
WBGene00021673	13.5023	-6.45068	1.41843	-4.54775	5.42e-06	1.52e-05
WBGene00194939	13.4241	-6.44178	1.59921	-4.02809	5.62e-05	0.000139526
WBGene00219267	26.2891	-6.43233	1.34168	-4.79422	1.63e-06	4.87e-06
WBGene00019390	13.2442	-6.42269	1.42361	-4.51154	6.44e-06	1.79e-05
WBGene00006000	13.064	-6.40242	1.52097	-4.20942	2.56e-05	6.63e-05
WBGene00005326	13.0114	-6.39678	1.41438	-4.52268	6.11e-06	1.7e-05
WBGene00011851	12.9877	-6.39382	1.44351	-4.42936	9.45e-06	2.58e-05
WBGene00044104	12.9719	-6.39215	1.82609	-3.50045	0.000464472	0.00101909
WBGene00196848	12.9617	-6.39195	1.46253	-4.37047	1.24e-05	3.33e-05
WBGene00020641	12.682	-6.36001	1.41622	-4.49084	7.09e-06	1.96e-05
WBGene00043053	578.577	-6.35823	0.384349	-16.5429	1.8e-61	1.53e-59
WBGene00014764	12.5547	-6.34552	1.49916	-4.23272	2.31e-05	6.01e-05
WBGene00005252	12.4322	-6.33161	1.43336	-4.41732	9.99e-06	2.72e-05
WBGene00050945	476.525	-6.32628	0.973078	-6.50132	7.96e-11	3.6e-10
WBGene00014837	12.2988	-6.31573	1.42255	-4.43971	9.01e-06	2.46e-05
WBGene00017596	12.0775	-6.28968	1.43597	-4.38009	1.19e-05	3.19e-05
WBGene00005391	12.0451	-6.28623	1.5336	-4.099	4.15e-05	0.000104748
WBGene00219655	11.6574	-6.23832	1.71317	-3.64139	0.000271175	0.000614353
WBGene00017118	11.5417	-6.2245	1.46288	-4.25497	2.09e-05	5.47e-05
WBGene00077564	11.5352	-6.22266	1.4753	-4.2179	2.47e-05	6.4e-05
WBGene00014789	11.3821	-6.20365	1.44346	-4.29777	1.73e-05	4.56e-05
WBGene00044095	11.2987	-6.19354	1.45166	-4.26652	1.99e-05	5.21e-05
WBGene00006014	11.1907	-6.17976	1.45444	-4.24889	2.15e-05	5.61e-05
WBGene00005368	11.1464	-6.17427	1.47539	-4.18485	2.85e-05	7.34e-05
WBGene00013842	213.379	-6.15535	0.979343	-6.28518	3.27e-10	1.4e-09
WBGene00044170	39.9207	-6.14897	1.16352	-5.28478	1.26e-07	4.2e-07
WBGene00005380	10.8578	-6.13529	1.50501	-4.07659	4.57e-05	0.000114608
WBGene00045293	102.215	-6.12748	0.84288	-7.2697	3.6e-13	1.98e-12
WBGene00005570	10.7758	-6.12541	1.49186	-4.1059	4.03e-05	0.000101807
WBGene00269384	10.6606	-6.11	1.48807	-4.10599	4.03e-05	0.000101776
WBGene00007181	95.8851	-6.10609	0.950803	-6.42204	1.34e-10	5.94e-10
WBGene00219610	10.6347	-6.10607	1.46997	-4.15389	3.27e-05	8.35e-05
WBGene00008098	58.9485	-6.07125	1.07839	-5.62991	1.8e-08	6.59e-08
WBGene00219656	10.2938	-6.05915	1.77953	-3.40491	0.000661847	0.00141842
WBGene00018450	78.9224	-6.05852	1.04983	-5.77096	7.88e-09	2.98e-08
WBGene00044660	399.375	-6.04984	0.635604	-9.51825	1.76e-21	1.71e-20
WBGene00014799	10.2026	-6.04655	1.48505	-4.07161	4.67e-05	0.00011695
WBGene00014838	10.0435	-6.02363	1.5429	-3.9041	9.46e-05	0.000228083
WBGene00021971	9.98016	-6.0149	1.51104	-3.98063	6.87e-05	0.00016878
WBGene00018451	76.4915	-6.01254	1.0506	-5.72294	1.05e-08	3.91e-08
WBGene00044022	9.96808	-6.01196	1.49163	-4.03046	5.57e-05	0.000138202
WBGene00010753	9.94044	-6.00813	1.48111	-4.05651	4.98e-05	0.000124461
WBGene00014710	9.86961	-5.99833	1.48234	-4.04653	5.2e-05	0.000129527
WBGene00005843	9.8578	-5.99668	1.4798	-4.05235	5.07e-05	0.000126565
WBGene00020971	9.79243	-5.98683	1.51561	-3.95011	7.81e-05	0.000190324
WBGene00023270	9.52522	-5.94732	1.63247	-3.64315	0.000269322	0.000610419
WBGene00005473	51.8742	-5.94531	0.989049	-6.01114	1.84e-09	7.39e-09
WBGene00006285	9.50278	-5.94354	1.48886	-3.99201	6.55e-05	0.000161301
WBGene00023476	9.46261	-5.93713	1.69616	-3.50035	0.000464651	0.00101938
WBGene00220180	52.0366	-5.92258	0.935586	-6.33034	2.45e-10	1.05e-09
WBGene00008658	9.34839	-5.92017	1.71548	-3.45103	0.000558456	0.00121225
WBGene00015077	286.978	-5.91298	0.723725	-8.1702	3.08e-16	2.14e-15
WBGene00196261	9.26031	-5.90704	1.60064	-3.69043	0.000223872	0.000513977
WBGene00219416	9.17003	-5.89175	1.54282	-3.81881	0.000134098	0.000317249
WBGene00014294	9695.14	-5.8778	0.531218	-11.0648	1.86e-28	2.75e-27
WBGene00219616	9.02501	-5.8691	1.64434	-3.56927	0.000357973	0.000798727
WBGene00018224	9.01211	-5.86711	1.52831	-3.83896	0.000123558	0.000293702
WBGene00009570	8.9914	-5.86273	1.61384	-3.63278	0.000280382	0.000633955
WBGene00006194	8.96284	-5.8588	1.5108	-3.87794	0.000105347	0.00025233
WBGene00023320	8.95337	-5.85796	1.68039	-3.48607	0.000490166	0.0010716
WBGene00005811	33.5368	-5.85618	1.18624	-4.93677	7.94e-07	2.45e-06
WBGene00198898	8.84492	-5.83988	1.52268	-3.83526	0.00012543	0.000297869
WBGene00023481	8.68873	-5.81387	1.53252	-3.79368	0.000148432	0.000349033
WBGene00005305	8.64565	-5.8076	1.63563	-3.55069	0.000384227	0.000853861
WBGene00012403	8.64456	-5.80727	1.80932	-3.20964	0.00132903	0.00272535
WBGene00017494	8.62847	-5.80358	1.56795	-3.70139	0.000214424	0.000493736
WBGene00014516	8.6121	-5.80208	1.71525	-3.38264	0.000717921	0.00153102
WBGene00017677	8.61373	-5.80123	1.55499	-3.73071	0.000190938	0.000442937
WBGene00021737	8.54046	-5.7903	1.77013	-3.27111	0.00107124	0.00222797
WBGene00045075	8.53071	-5.78841	1.67573	-3.45426	0.000551799	0.00119878
WBGene00019176	283.176	-5.78209	0.628962	-9.19307	3.82e-20	3.43e-19
WBGene00045045	8.36444	-5.75925	1.54032	-3.73899	0.00018476	0.00042948
WBGene00019385	8.34471	-5.75674	1.56216	-3.68511	0.000228604	0.000524359
WBGene00015370	8.32027	-5.7523	1.79111	-3.21158	0.00132009	0.00270874
WBGene00194800	8.2858	-5.74624	1.5487	-3.71036	0.000206966	0.000477451
WBGene00011818	8.20788	-5.73245	1.61925	-3.54018	0.000399856	0.000885946
WBGene00016666	150.413	-5.72817	0.682627	-8.39137	4.81e-17	3.54e-16
WBGene00044262	8.1668	-5.72555	1.56005	-3.67011	0.000242442	0.000553722
WBGene00219951	8.13861	-5.72069	1.60249	-3.56987	0.00035716	0.000797071
WBGene00019912	8.08816	-5.71063	1.5428	-3.70147	0.000214352	0.00049363
WBGene00018449	78.4862	-5.70409	1.06877	-5.33705	9.45e-08	3.2e-07
WBGene00219673	7.99397	-5.69452	1.57338	-3.61929	0.000295412	0.000666534
WBGene00219702	7.91978	-5.68093	1.54436	-3.67849	0.000234615	0.000536725
WBGene00196346	7.91707	-5.68028	1.78012	-3.19095	0.00141806	0.00289553
WBGene00023480	7.8896	-5.67485	1.56732	-3.62074	0.000293761	0.000662941
WBGene00255606	7.76441	-5.652	1.55073	-3.64474	0.00026766	0.000607021
WBGene00014842	28.3075	-5.64927	1.23446	-4.57633	4.73e-06	1.34e-05
WBGene00014794	7.65168	-5.6302	1.59276	-3.53488	0.000407967	0.00090294
WBGene00271643	15.1342	-5.62646	1.47787	-3.80715	0.000140575	0.000331561
WBGene00044768	7.61186	-5.62388	1.56648	-3.59014	0.000330495	0.000740792
WBGene00011514	55.1404	-5.61371	0.921678	-6.09075	1.12e-09	4.58e-09
WBGene00016854	7.5084	-5.60417	1.58208	-3.54228	0.000396691	0.000879453
WBGene00023470	7.44012	-5.59076	1.58026	-3.53788	0.000403358	0.000893354
WBGene00077438	7.43421	-5.5906	1.79953	-3.1067	0.0018919	0.00378447
WBGene00201279	7.4154	-5.58464	1.67078	-3.34253	0.00083017	0.00175412
WBGene00020059	7.35194	-5.57343	1.61433	-3.45247	0.000555477	0.00120607
WBGene00010402	7.33785	-5.56993	1.59971	-3.48183	0.000498005	0.00108778
WBGene00271646	7.24913	-5.55269	2.15322	-2.57878	0.00991488	0.0175606
WBGene00219689	7.19239	-5.54074	1.67921	-3.29961	0.000968187	0.00202711
WBGene00005115	7.12346	-5.52887	1.698	-3.25611	0.00112952	0.00234159
WBGene00019706	6.97492	-5.49741	1.59104	-3.45524	0.000549801	0.00119467
WBGene00012793	6.95746	-5.49392	1.66273	-3.30415	0.000952656	0.001997
WBGene00219646	6.90864	-5.48425	1.63106	-3.36237	0.000772755	0.00163926
WBGene00235375	6.81028	-5.46186	1.68019	-3.25074	0.00115105	0.00238293
WBGene00049228	13.3695	-5.44611	1.38747	-3.9252	8.67e-05	0.000209929
WBGene00016280	6.68308	-5.43666	1.98875	-2.73371	0.00626253	0.0114969
WBGene00005747	6.63935	-5.42674	1.62379	-3.34202	0.000831725	0.00175708
WBGene00014800	6.64081	-5.42605	1.64275	-3.30303	0.000956453	0.00200459
WBGene00011550	6.59735	-5.41702	1.60598	-3.37302	0.000743482	0.00158119
WBGene00015432	6.52371	-5.40063	1.65339	-3.2664	0.00108926	0.00226376
WBGene00001605	6.48544	-5.39152	1.66109	-3.24577	0.00117134	0.00242205
WBGene00005266	6.44453	-5.38375	1.66009	-3.24304	0.00118262	0.00244403
WBGene00220007	12.8381	-5.3808	1.50506	-3.57515	0.000350025	0.000782001
WBGene00077689	36.7001	-5.37979	1.03454	-5.20015	1.99e-07	6.52e-07
WBGene00269375	6.39353	-5.37089	1.67967	-3.19759	0.00138581	0.00283369
WBGene00197080	214.711	-5.36031	0.582308	-9.20528	3.41e-20	3.07e-19
WBGene00014920	6.29252	-5.34804	1.72352	-3.10297	0.0019159	0.00382908
WBGene00005863	6.24715	-5.3379	1.63786	-3.25908	0.00111774	0.00231911
WBGene00011421	104.59	-5.33417	0.626602	-8.51286	1.7e-17	1.29e-16
WBGene00014694	6.22797	-5.33293	1.76704	-3.01801	0.0025444	0.00498213
WBGene00044960	6.1496	-5.3152	1.65878	-3.20429	0.00135396	0.00277444
WBGene00023264	6.13432	-5.3118	1.64458	-3.22988	0.00123842	0.00255255
WBGene00005535	6.10723	-5.30574	1.66374	-3.18903	0.0014275	0.00291321
WBGene00023259	6.08988	-5.30091	1.80491	-2.93693	0.00331479	0.00637644
WBGene00014861	6.02095	-5.28509	1.66397	-3.1762	0.0014922	0.00303618
WBGene00014888	6.02095	-5.28509	1.66397	-3.1762	0.0014922	0.00303618
WBGene00195809	5.99868	-5.27999	1.6541	-3.19207	0.00141258	0.00288486
WBGene00219667	5.97532	-5.27459	1.67178	-3.15507	0.00160462	0.00324877
WBGene00013134	5.97131	-5.27369	1.68132	-3.13663	0.00170902	0.00344249
WBGene00235376	5.95495	-5.26988	1.71151	-3.07907	0.00207645	0.0041276
WBGene00044268	5.91305	-5.25809	1.72598	-3.04644	0.00231568	0.00456807
WBGene00006223	5.90877	-5.25712	1.73288	-3.03375	0.00241538	0.00474893
WBGene00017729	5.86124	-5.24503	2.09644	-2.50187	0.0123538	0.0215131
WBGene00023248	5.84775	-5.24363	1.85746	-2.82301	0.00475754	0.00891421
WBGene00019517	22.739	-5.23357	1.61027	-3.25013	0.00115354	0.00238744
WBGene00013614	5.80867	-5.23349	1.66381	-3.14549	0.00165809	0.00334829
WBGene00005547	5.72712	-5.21392	1.75736	-2.96691	0.00300813	0.00582335
WBGene00044702	5.68121	-5.20071	1.69577	-3.06687	0.00216312	0.00428857
WBGene00077781	5.64485	-5.19288	1.75864	-2.95279	0.00314917	0.00607967
WBGene00014755	32.4897	-5.19217	1.07798	-4.81659	1.46e-06	4.38e-06
WBGene00219587	30.8981	-5.18838	1.15292	-4.50021	6.79e-06	1.88e-05
WBGene00077694	5.59748	-5.18025	1.70557	-3.03726	0.00238741	0.00469764
WBGene00007481	5.59976	-5.17968	1.71641	-3.01774	0.00254663	0.00498567
WBGene00199615	5.59184	-5.17885	1.72071	-3.00971	0.00261494	0.00510873
WBGene00169188	5.5913	-5.17865	1.79898	-2.87866	0.00399366	0.00758708
WBGene00005277	5.58648	-5.17754	1.71042	-3.02706	0.00246943	0.00484802
WBGene00019976	5.58594	-5.1758	1.95974	-2.64107	0.00826449	0.0148394
WBGene00008013	5.56811	-5.17191	1.72183	-3.00373	0.00266695	0.00520177
WBGene00219598	65.4586	-5.16242	1.00511	-5.1362	2.8e-07	9.03e-07
WBGene00195255	5.52411	-5.16098	1.70995	-3.0182	0.0025428	0.00497946
WBGene00044054	5.52356	-5.16083	1.67891	-3.07393	0.0021126	0.00419503
WBGene00005963	5.51929	-5.15978	1.77674	-2.90407	0.00368346	0.00703754
WBGene00016275	5.49858	-5.15282	1.90977	-2.69813	0.006973	0.0126956
WBGene00219838	733.867	-5.1522	0.281624	-18.2946	9.13e-75	1.58e-72
WBGene00005320	5.44265	-5.13933	1.67967	-3.05972	0.00221546	0.00438535
WBGene00194675	5.42856	-5.13478	1.81301	-2.83219	0.00462304	0.00868314
WBGene00023302	5.41029	-5.13001	1.77669	-2.8874	0.00388445	0.00739208
WBGene00206526	20.4956	-5.12256	1.23271	-4.15553	3.25e-05	8.29e-05
WBGene00006095	5.32137	-5.10813	1.81007	-2.82206	0.00477168	0.00893921
WBGene00011483	5.29882	-5.10019	1.80327	-2.8283	0.00467967	0.00878144
WBGene00197481	5.19581	-5.07286	2.06712	-2.45407	0.014125	0.0243006
WBGene00219666	5.18664	-5.07056	1.76343	-2.8754	0.00403516	0.0076614
WBGene00268211	86.2222	-5.06373	0.702855	-7.20452	5.83e-13	3.15e-12
WBGene00006114	5.15082	-5.05981	1.70194	-2.97297	0.00294936	0.00571498
WBGene00005325	5.13928	-5.05672	1.72429	-2.93264	0.0033609	0.00645761
WBGene00009910	5.14101	-5.05608	1.81274	-2.78919	0.00528402	0.00982871
WBGene00206536	5.11446	-5.04885	1.76532	-2.86002	0.00423619	0.00800864
WBGene00202185	5.06037	-5.03313	1.85003	-2.72057	0.00651704	0.0119281
WBGene00220251	5.01918	-5.02283	1.87756	-2.67519	0.00746862	0.0135196
WBGene00219591	10.0267	-5.02032	1.45575	-3.4486	0.000563495	0.00122218
WBGene00014729	4.98027	-5.01005	1.91504	-2.61617	0.00889228	0.0158806
WBGene00235152	4.95654	-5.00434	1.71839	-2.91223	0.00358856	0.00686963
WBGene00009230	4.92299	-4.99501	1.74172	-2.86786	0.00413264	0.00783644
WBGene00005878	4.92499	-4.99429	1.78782	-2.79351	0.00521396	0.00971041
WBGene00173920	4.86863	-4.97845	1.9685	-2.52906	0.0114369	0.020044
WBGene00009837	121.045	-4.97571	1.13221	-4.39468	1.11e-05	3e-05
WBGene00219661	4.79016	-4.95669	2.00214	-2.47569	0.0132977	0.0229969
WBGene00023274	4.78463	-4.95227	1.98678	-2.49261	0.0126806	0.0220312
WBGene00219590	70.6962	-4.9516	1.11685	-4.43356	9.27e-06	2.53e-05
WBGene00235286	4.76398	-4.94805	2.05229	-2.41099	0.0159093	0.0271175
WBGene00199384	4.74735	-4.94111	1.83932	-2.68637	0.00722326	0.0131141
WBGene00194665	17.2937	-4.9338	1.40955	-3.50028	0.000464772	0.00101955
WBGene00268210	4.71451	-4.93271	1.95982	-2.51692	0.0118386	0.0206768
WBGene00022407	4.69115	-4.92594	1.82157	-2.70423	0.0068462	0.0124792
WBGene00016304	927.761	-4.91016	0.419316	-11.7099	1.13e-31	2.02e-30
WBGene00018581	824.151	-4.90986	0.410459	-11.9619	5.63e-33	1.07e-31
WBGene00023021	435.611	-4.90791	0.365288	-13.4357	3.73e-41	1.11e-39
WBGene00044764	142.97	-4.90161	0.585904	-8.36589	5.97e-17	4.36e-16
WBGene00219817	4.56342	-4.88524	1.82592	-2.6755	0.00746186	0.0135114
WBGene00202010	4.56179	-4.88469	1.77263	-2.75563	0.00585801	0.0108062
WBGene00005312	4.54651	-4.88012	1.7922	-2.72298	0.00646961	0.0118461
WBGene00005709	4.54716	-4.87896	1.85465	-2.63066	0.00852193	0.0152615
WBGene00023273	4.51351	-4.87007	1.83525	-2.65362	0.00796329	0.0143455
WBGene00219611	4.48397	-4.8608	1.93111	-2.5171	0.0118326	0.0206677
WBGene00005997	4.47497	-4.85682	1.87151	-2.59513	0.00945544	0.0168064
WBGene00005872	4.47151	-4.8558	1.81401	-2.67683	0.00743224	0.013461
WBGene00219831	25.8548	-4.85308	1.0702	-4.53476	5.77e-06	1.61e-05
WBGene00009590	91.5734	-4.85224	0.565728	-8.57699	9.74e-18	7.54e-17
WBGene00235338	4.44906	-4.84767	1.98536	-2.44171	0.014618	0.0250913
WBGene00005367	4.4326	-4.84378	1.80179	-2.68832	0.00718131	0.0130411
WBGene00015654	4.43178	-4.84351	1.78496	-2.71351	0.00665742	0.0121683
WBGene00235106	4.39368	-4.83159	1.84455	-2.61938	0.00880898	0.0157481
WBGene00200150	4.34496	-4.81476	1.8537	-2.59737	0.00939394	0.0167102
WBGene00044285	4.32941	-4.80991	1.79797	-2.67519	0.0074688	0.0135196
WBGene00023511	4.30741	-4.80287	1.83124	-2.62274	0.00872253	0.0155997
WBGene00011703	4.30714	-4.80278	1.82828	-2.62694	0.00861555	0.0154182
WBGene00005413	4.30323	-4.79999	1.81894	-2.6389	0.00831751	0.0149251
WBGene00198686	4.29695	-4.79943	1.90005	-2.52594	0.0115388	0.0202061
WBGene00198248	4.2976	-4.79819	1.82749	-2.62557	0.00865045	0.0154757
WBGene00013644	39.2102	-4.79238	0.939209	-5.10257	3.35e-07	1.07e-06
WBGene00005200	4.26704	-4.78845	1.97067	-2.42985	0.015105	0.0258503
WBGene00219662	4.26514	-4.78779	1.78772	-2.67816	0.00740287	0.0134132
WBGene00011660	561.16	-4.78723	0.318018	-15.0533	3.28e-51	1.68e-49
WBGene00219660	4.23723	-4.77876	1.81832	-2.62812	0.00858588	0.0153687
WBGene00008827	4.24004	-4.77825	1.89499	-2.52152	0.011685	0.0204417
WBGene00219803	8.53065	-4.77136	1.5137	-3.15212	0.0016209	0.00327849
WBGene00198925	4.19886	-4.76621	1.86244	-2.55913	0.0104936	0.0185113
WBGene00196884	4.1974	-4.76437	2.00503	-2.37621	0.0174913	0.0295835
WBGene00171941	4.19468	-4.76332	1.868	-2.54996	0.0107735	0.0189606
WBGene00220020	4.16786	-4.75451	1.80091	-2.64005	0.00828931	0.0148769
WBGene00009757	4.16249	-4.75275	1.80011	-2.64025	0.00828451	0.0148707
WBGene00197206	4.12868	-4.74146	1.8805	-2.52138	0.0116895	0.0204463
WBGene00219565	4.11795	-4.73791	1.86079	-2.54619	0.0108907	0.0191533
WBGene00201042	4.10749	-4.73442	1.86889	-2.53328	0.0113002	0.019824
WBGene00019494	4.02912	-4.70479	1.88388	-2.4974	0.0125109	0.0217648
WBGene00005235	3.99639	-4.69355	1.86441	-2.51745	0.0118208	0.0206505
WBGene00012218	3.97867	-4.68739	1.84393	-2.54207	0.0110198	0.0193593
WBGene00202483	3.94811	-4.6767	2.12839	-2.1973	0.0279993	0.0455234
WBGene00005307	3.93602	-4.67256	1.9331	-2.41714	0.0156431	0.0267103
WBGene00197691	7.92277	-4.67017	1.49085	-3.13255	0.00173295	0.00348882
WBGene00023244	3.92512	-4.66714	1.92811	-2.42058	0.0154956	0.0264725
WBGene00201134	3.91921	-4.66514	2.02978	-2.29835	0.0215418	0.0358037
WBGene00198402	3.89321	-4.65587	1.84032	-2.52992	0.0114088	0.0200004
WBGene00014633	3.87711	-4.65021	1.86688	-2.4909	0.0127422	0.0221295
WBGene00005970	3.87684	-4.65011	1.84624	-2.51869	0.0117793	0.0205874
WBGene00170658	3.87066	-4.64789	1.84534	-2.51872	0.0117782	0.0205874
WBGene00197265	3.86584	-4.64621	1.85237	-2.50825	0.0121332	0.0211584
WBGene00000308	3.86047	-4.6443	1.86753	-2.48687	0.0128873	0.0223608
WBGene00019853	124.905	-4.64206	0.493324	-9.40976	4.97e-21	4.69e-20
WBGene00045057	3.82747	-4.63243	1.93258	-2.39702	0.0165289	0.0280856
WBGene00005556	3.79956	-4.62224	1.97897	-2.33568	0.0195078	0.032692
WBGene00219731	3.80021	-4.62092	1.98414	-2.32893	0.019863	0.0332379
WBGene00005511	3.77365	-4.61129	1.85161	-2.49042	0.0127593	0.0221558
WBGene00202327	3.76938	-4.60974	1.94747	-2.36704	0.017931	0.0302521
WBGene00270292	3.76829	-4.60935	1.8534	-2.48697	0.0128837	0.0223564
WBGene00173683	3.76157	-4.60676	2.03046	-2.26882	0.023279	0.0384287
WBGene00200355	3.75647	-4.60496	1.92532	-2.39179	0.0167662	0.0284426
WBGene00009764	3.75284	-4.60203	1.97355	-2.33186	0.0197082	0.0329984
WBGene00023471	3.72065	-4.59005	1.88004	-2.44147	0.0146278	0.0251042
WBGene00005031	3.7032	-4.5836	1.95639	-2.34289	0.019135	0.0321151
WBGene00005906	34.0728	-4.57865	0.998431	-4.58585	4.52e-06	1.28e-05
WBGene00016305	306.875	-4.56447	0.937995	-4.8662	1.14e-06	3.46e-06
WBGene00200167	3.63237	-4.55706	1.92105	-2.37217	0.0176838	0.0298777
WBGene00008723	3.62901	-4.55396	1.90348	-2.39244	0.0167367	0.0284011
WBGene00023319	3.61774	-4.54966	1.8904	-2.40672	0.0160965	0.0274117
WBGene00206509	3.59601	-4.54141	1.87634	-2.42035	0.0155056	0.0264876
WBGene00008791	214.389	-4.53797	0.530986	-8.5463	1.27e-17	9.73e-17
WBGene00195117	3.58555	-4.53744	1.9122	-2.37289	0.0176497	0.0298245
WBGene00196447	3.57482	-4.53332	1.95612	-2.3175	0.0204763	0.0341651
WBGene00012419	3.56501	-4.52784	2.01503	-2.24703	0.0246381	0.0404881
WBGene00005130	3.52101	-4.51056	1.91211	-2.35895	0.0183267	0.0308596
WBGene00050948	13.0783	-4.50919	1.28568	-3.50726	0.000452754	0.000995705
WBGene00014353	3.51282	-4.5091	2.00125	-2.25314	0.0242502	0.0399061
WBGene00005192	3.51673	-4.50905	2.07961	-2.16822	0.0301423	0.0486842
WBGene00219442	3.499	-4.50196	1.89747	-2.37261	0.0176629	0.0298446
WBGene00014798	3.47646	-4.49308	1.90364	-2.36025	0.0182624	0.0307653
WBGene00168049	3.47028	-4.49055	2.01102	-2.23297	0.0255509	0.0418538
WBGene00044503	3.44373	-4.48008	1.94814	-2.29967	0.0214672	0.0356914
WBGene00195687	3.44318	-4.47982	1.96195	-2.28335	0.0224095	0.0371184
WBGene00014956	3.41836	-4.46798	1.92508	-2.32094	0.0202902	0.0338817
WBGene00010529	3.41782	-4.46773	1.91871	-2.32851	0.0198851	0.0332723
WBGene00005704	3.40064	-4.46082	2.01505	-2.21375	0.0268463	0.043791
WBGene00013648	3.38509	-4.45456	1.90974	-2.33255	0.0196715	0.0329468
WBGene00197205	6.89374	-4.45173	1.5252	-2.91879	0.00351395	0.00673368
WBGene00200713	3.36482	-4.44441	2.01176	-2.20922	0.0271594	0.0442537
WBGene00219415	3.34699	-4.43895	2.01008	-2.20835	0.0272198	0.0443457
WBGene00023358	3.34363	-4.43575	2.03704	-2.17754	0.02944	0.0476456
WBGene00014693	3.31491	-4.42373	1.95043	-2.26808	0.0233243	0.0384978
WBGene00014984	3.30418	-4.41929	1.92559	-2.29503	0.0217314	0.0360987
WBGene00199010	3.27708	-4.40804	1.94368	-2.26788	0.0233364	0.0385149
WBGene00199670	3.23454	-4.38796	1.9608	-2.23784	0.0252314	0.0413755
WBGene00014978	144.786	-4.37774	0.551296	-7.94083	2.01e-15	1.32e-14
WBGene00023209	2259.9	-4.37722	0.34459	-12.7027	5.71e-37	1.35e-35
WBGene00219776	6.55026	-4.37378	1.53301	-2.85307	0.00432995	0.00817492
WBGene00015575	3.10507	-4.32978	1.99436	-2.17101	0.0299306	0.0483805
WBGene00172399	3.10426	-4.32938	1.96276	-2.20576	0.027401	0.0446136
WBGene00166274	3.09407	-4.32491	2.00205	-2.16024	0.0307544	0.0495699
WBGene00219696	76.0796	-4.30181	0.859675	-5.004	5.62e-07	1.76e-06
WBGene00014979	50.3217	-4.29798	0.942044	-4.5624	5.06e-06	1.42e-05
WBGene00005974	3.00725	-4.28359	1.975	-2.16891	0.0300896	0.0486165
WBGene00045514	3.00161	-4.28101	1.98049	-2.1616	0.0306493	0.0494358
WBGene00220140	10.9723	-4.20795	1.2913	-3.25869	0.00111928	0.00232207
WBGene00206494	16.8205	-4.18588	1.19711	-3.49667	0.00047111	0.00103234
WBGene00012954	40.1506	-4.17266	1.13816	-3.66614	0.00024624	0.000561495
WBGene00015596	20.5578	-4.15093	1.08465	-3.82698	0.000129724	0.000307448
WBGene00009697	62.8613	-4.14167	0.596746	-6.94043	3.91e-12	1.98e-11
WBGene00022229	15.1887	-4.12755	1.24072	-3.32673	0.000878719	0.00185149
WBGene00009020	25.4732	-4.11563	0.836721	-4.91876	8.71e-07	2.68e-06
WBGene00219698	15.7189	-4.08408	1.18119	-3.45759	0.00054503	0.00118533
WBGene00012680	42.7816	-4.053	1.13648	-3.56627	0.000362093	0.000807199
WBGene00269436	42.5739	-4.04131	1.28426	-3.14681	0.00165062	0.00333382
WBGene00022978	5.22046	-4.02905	1.60027	-2.51773	0.0118115	0.0206373
WBGene00022755	69.3066	-4.02856	1.29163	-3.11898	0.00181477	0.00364237
WBGene00077594	243.31	-4.00978	0.666174	-6.01912	1.75e-09	7.05e-09
WBGene00005327	13.9281	-3.99956	1.18302	-3.3808	0.000722759	0.00154002
WBGene00012189	75.4533	-3.99278	0.921113	-4.33474	1.46e-05	3.89e-05
WBGene00023465	13.9236	-3.99145	1.17864	-3.3865	0.000707899	0.00151108
WBGene00014898	9.12056	-3.96213	1.37325	-2.88521	0.00391154	0.00743985
WBGene00198620	4.92809	-3.94043	1.63777	-2.40598	0.0161292	0.0274613
WBGene00219721	4.83726	-3.91172	1.62316	-2.40995	0.0159548	0.0271868
WBGene00005206	106.372	-3.90791	0.981212	-3.98274	6.81e-05	0.000167433
WBGene00019117	790.059	-3.88861	0.345669	-11.2495	2.33e-29	3.62e-28
WBGene00271636	152.67	-3.87281	0.708178	-5.4687	4.53e-08	1.58e-07
WBGene00269386	12.7133	-3.86262	1.22888	-3.14321	0.00167105	0.00337295
WBGene00013155	9.09779	-3.85529	1.54786	-2.49072	0.0127484	0.0221386
WBGene00219718	13.3662	-3.82753	1.23631	-3.09594	0.00196188	0.00391437
WBGene00015013	25.0179	-3.78435	0.828689	-4.56667	4.96e-06	1.39e-05
WBGene00017067	245.507	-3.71089	0.376019	-9.86889	5.68e-23	6.04e-22
WBGene00219866	171.37	-3.70767	0.486108	-7.62726	2.4e-14	1.45e-13
WBGene00235387	266.584	-3.7007	0.326605	-11.3308	9.23e-30	1.47e-28
WBGene00219343	100.589	-3.69088	0.759499	-4.85962	1.18e-06	3.57e-06
WBGene00014667	95.5677	-3.68853	0.958646	-3.84765	0.000119257	0.000283927
WBGene00009656	36.9379	-3.68346	1.22001	-3.01922	0.00253429	0.00496453
WBGene00049662	7.79705	-3.68072	1.32888	-2.7698	0.00560915	0.0103812
WBGene00219950	210.831	-3.66268	0.413071	-8.86695	7.52e-19	6.24e-18
WBGene00044343	20.1127	-3.6352	1.22704	-2.96257	0.00305078	0.00590085
WBGene00005668	24.6246	-3.59862	1.20465	-2.98727	0.00281481	0.00546697
WBGene00008350	44.8924	-3.57112	1.4459	-2.46982	0.013518	0.0233474
WBGene00012569	26.6487	-3.53045	1.2386	-2.85036	0.00436696	0.00824028
WBGene00194984	13.4	-3.49746	1.23767	-2.82585	0.00471555	0.00884363
WBGene00002221	141.393	-3.49651	0.388661	-8.9963	2.33e-19	2e-18
WBGene00198975	6.90297	-3.49153	1.38974	-2.51236	0.0119928	0.020933
WBGene00185076	89.7521	-3.48141	0.917758	-3.79339	0.000148605	0.000349403
WBGene00194683	42.0777	-3.46787	0.832395	-4.16614	3.1e-05	7.93e-05
WBGene00014375	41.7978	-3.46136	1.01835	-3.39897	0.000676393	0.00144726
WBGene00021130	7.0192	-3.46078	1.44504	-2.39493	0.0166234	0.0282344
WBGene00219617	57.1432	-3.44088	0.897871	-3.83226	0.00012697	0.000301271
WBGene00005431	22.1167	-3.4206	1.30965	-2.61185	0.00900537	0.0160662
WBGene00014711	9.56858	-3.42006	1.41097	-2.42391	0.0153545	0.0262494
WBGene00200151	6.54453	-3.4045	1.36553	-2.49317	0.0126609	0.0220002
WBGene00165608	6.47131	-3.38993	1.35485	-2.50208	0.0123466	0.0215023
WBGene00011160	21.5862	-3.3669	0.847209	-3.9741	7.06e-05	0.000173115
WBGene00020087	61.8796	-3.35039	0.932312	-3.59364	0.000326096	0.00073137
WBGene00269376	16.7192	-3.33292	1.35888	-2.45269	0.0141791	0.0243806
WBGene00005176	26.5677	-3.30547	1.2901	-2.56217	0.010402	0.0183612
WBGene00016080	9.47298	-3.26833	1.38523	-2.35941	0.0183038	0.0308258
WBGene00046207	5.88819	-3.23907	1.37781	-2.35088	0.0187291	0.0314948
WBGene00013843	49.2641	-3.20275	0.874799	-3.66112	0.000251114	0.00057174
WBGene00206489	54.3654	-3.19855	0.909297	-3.51761	0.000435459	0.000959543
WBGene00005092	65.5007	-3.19773	0.45938	-6.96098	3.38e-12	1.72e-11
WBGene00219709	53.2192	-3.1616	0.693119	-4.56141	5.08e-06	1.43e-05
WBGene00020352	63.0796	-3.14021	0.563865	-5.56908	2.56e-08	9.2e-08
WBGene00044053	53.8891	-3.06538	1.05137	-2.9156	0.0035501	0.00679833
WBGene00014771	8.33465	-3.06097	1.40672	-2.17596	0.0295585	0.0478168
WBGene00219972	11.1067	-3.04745	1.34203	-2.27077	0.0231607	0.0382613
WBGene00021445	138.304	-3.03748	0.395084	-7.68818	1.49e-14	9.15e-14
WBGene00219490	9.80276	-3.00448	1.36931	-2.19416	0.028224	0.0458424
WBGene00194657	149.269	-2.90424	0.484801	-5.99058	2.09e-09	8.35e-09
WBGene00045066	23.4955	-2.8649	0.711248	-4.02799	5.63e-05	0.00013957
WBGene00008083	21.0997	-2.84877	0.864343	-3.29588	0.000981141	0.00205232
WBGene00023252	203.683	-2.8046	0.507351	-5.52792	3.24e-08	1.15e-07
WBGene00021886	460.07	-2.75099	0.799635	-3.4403	0.000581064	0.00125714
WBGene00045509	30.5115	-2.72602	0.650485	-4.19075	2.78e-05	7.17e-05
WBGene00009022	12.9341	-2.713	1.06609	-2.54483	0.0109332	0.0192206
WBGene00220001	35.0456	-2.70915	0.975853	-2.77619	0.00550004	0.0102002
WBGene00014820	54.6116	-2.70489	0.951024	-2.84419	0.00445249	0.0083866
WBGene00000191	196.441	-2.70177	0.657033	-4.11207	3.92e-05	9.93e-05
WBGene00235086	25.8813	-2.65655	1.03282	-2.57214	0.0101071	0.0178772
WBGene00015989	281.8	-2.61549	0.463547	-5.64234	1.68e-08	6.15e-08
WBGene00023039	72.1497	-2.61487	1.02939	-2.54022	0.0110784	0.0194546
WBGene00013826	56.176	-2.6023	1.02156	-2.54737	0.0108537	0.0190928
WBGene00005366	30.7801	-2.55775	0.553936	-4.61741	3.89e-06	1.11e-05
WBGene00019441	249.191	-2.53044	0.405832	-6.2352	4.51e-10	1.9e-09
WBGene00198873	15.2726	-2.52784	1.04684	-2.41474	0.0157465	0.0268646
WBGene00169197	22.5147	-2.52417	0.650223	-3.88201	0.000103598	0.000248512
WBGene00005646	110.367	-2.50715	0.376735	-6.65495	2.83e-11	1.33e-10
WBGene00021278	13.529	-2.49114	1.0245	-2.43157	0.0150337	0.0257361
WBGene00018856	201.464	-2.48205	0.356649	-6.95937	3.42e-12	1.74e-11
WBGene00007165	114.148	-2.46625	0.800706	-3.0801	0.00206934	0.00411529
WBGene00004054	10.5613	-2.45628	0.996185	-2.46569	0.013675	0.023595
WBGene00010092	90.4952	-2.43422	0.584353	-4.16566	3.1e-05	7.95e-05
WBGene00219303	67.8673	-2.41909	0.520055	-4.6516	3.29e-06	9.48e-06
WBGene00010112	28.8185	-2.3635	0.575343	-4.10798	3.99e-05	0.000100937
WBGene00077457	126.673	-2.35492	0.53443	-4.40642	1.05e-05	2.85e-05
WBGene00271650	39.1212	-2.35033	0.575683	-4.08268	4.45e-05	0.000111833
WBGene00219763	25.8695	-2.33104	0.891245	-2.61549	0.00891007	0.0159111
WBGene00021520	71.53	-2.26589	0.631024	-3.59082	0.000329643	0.000738956
WBGene00014643	38.9504	-2.26295	0.499774	-4.52795	5.96e-06	1.66e-05
WBGene00219897	30.7771	-2.25382	0.637979	-3.53275	0.000411268	0.000909621
WBGene00015597	489.138	-2.22148	0.34132	-6.50849	7.59e-11	3.44e-10
WBGene00044015	20.5292	-2.20606	0.922026	-2.39262	0.0167286	0.0283916
WBGene00219644	16.8013	-2.20207	0.789062	-2.79074	0.0052587	0.00978403
WBGene00050946	17.0656	-2.17712	0.722702	-3.01247	0.0025913	0.00506431
WBGene00219631	22.1713	-2.16034	0.940078	-2.29805	0.0215592	0.0358233
WBGene00045086	16.8068	-2.15294	0.744144	-2.89318	0.00381368	0.00726722
WBGene00014917	56.4728	-2.14153	0.637878	-3.35726	0.000787183	0.00166846
WBGene00003067	127.067	-2.13785	0.388784	-5.49882	3.82e-08	1.35e-07
WBGene00021903	785.186	-2.12683	0.288995	-7.35939	1.85e-13	1.04e-12
WBGene00219859	73.7719	-2.1158	0.375695	-5.6317	1.78e-08	6.52e-08
WBGene00023069	5303.04	-2.10869	0.3031	-6.95708	3.47e-12	1.76e-11
WBGene00010302	555.674	-2.02282	0.80058	-2.5267	0.0115141	0.0201689
WBGene00021018	367.298	-1.99961	0.236107	-8.46911	2.47e-17	1.86e-16
WBGene00022370	134.638	-1.98091	0.434924	-4.5546	5.25e-06	1.47e-05
WBGene00077443	45.1013	-1.95716	0.590229	-3.31594	0.00091337	0.00191965
WBGene00018199	79.1759	-1.92567	0.568195	-3.3891	0.000701236	0.00149756
WBGene00016255	160.676	-1.85738	0.423129	-4.38964	1.14e-05	3.06e-05
WBGene00235385	47.8988	-1.82611	0.815366	-2.23962	0.0251154	0.0412064
WBGene00014941	110.74	-1.78792	0.595368	-3.00305	0.00267293	0.00521298
WBGene00219571	247.618	-1.78144	0.269703	-6.60517	3.97e-11	1.84e-10
WBGene00011866	504.435	-1.68303	0.332599	-5.06023	4.19e-07	1.33e-06
WBGene00021265	45.7737	-1.62514	0.714446	-2.27469	0.0229247	0.0379104
WBGene00012572	65.1267	-1.52576	0.647829	-2.35519	0.0185134	0.0311577
WBGene00220215	29.4953	-1.52553	0.614051	-2.48437	0.0129781	0.0225053
WBGene00010313	38.613	-1.52034	0.457871	-3.32046	0.000898697	0.00189058
WBGene00020729	219.704	-1.5146	0.29353	-5.15996	2.47e-07	8e-07
WBGene00164983	109.015	-1.44416	0.364235	-3.96491	7.34e-05	0.00017963
WBGene00000801	159.757	-1.437	0.289977	-4.95556	7.21e-07	2.23e-06
WBGene00018699	70.6353	-1.38879	0.497875	-2.78943	0.00528013	0.0098231
WBGene00022904	67.8236	-1.33133	0.534951	-2.4887	0.012821	0.0222561
WBGene00219701	45.7388	-1.30892	0.540064	-2.42364	0.0153657	0.0262646
WBGene00007902	799.104	-1.29687	0.276916	-4.68326	2.82e-06	8.2e-06
WBGene00014994	44.2707	-1.27112	0.507609	-2.50414	0.012275	0.0213858
WBGene00007899	1187.43	-1.27057	0.479098	-2.652	0.00800164	0.01441
WBGene00017477	135.061	-1.21285	0.440128	-2.75567	0.00585714	0.0108055
WBGene00014751	165.707	-1.19435	0.428289	-2.78865	0.00529276	0.00984415
WBGene00015640	714.436	-1.1862	0.527988	-2.24665	0.0246626	0.0405196
WBGene00196843	51.4363	-1.09533	0.471939	-2.32092	0.0202914	0.0338817
WBGene00017849	1219.77	-0.991447	0.444779	-2.22908	0.0258086	0.0422299
WBGene00016967	1664.93	-0.978945	0.421837	-2.32067	0.0203048	0.0339015
WBGene00235270	2027.7	-0.624043	0.205267	-3.04016	0.00236453	0.00465668
